# Supplementary material for: Dissecting Molecular Heterogeneity of Circulating Tumor Cells (CTCs) from Metastatic Breast Cancer Patients through Copy Number Aberration (CNA) and Single Nucleotide Variant (SNV) Single Cell Analysis
Source: MDPI journal article supplement (doi:10.3390/cancers14163925), 2022-08-14
Supplement: s1 [file s1]

**Supplementary Table S1.** List of the variants detected in single circulating tumor cells (CTCs) of patients in the different timepoints. Time A: baseline; time B: 6-8 weeks after the beginning of treatment; time C: 2-4 weeks after the last dose of therapy.

|                           |                           |                            |                              |                          |                           |                          |                          |                           |                              |                          |                             |
|---------------------------|---------------------------|----------------------------|------------------------------|--------------------------|---------------------------|--------------------------|--------------------------|---------------------------|------------------------------|--------------------------|-----------------------------|
| Patient CH29              | Time A                    |                            |                              |                          |                           |                          |                          |                           |                              |                          |                             |
|                           | 1                         | 4                          | 5                            | 6                        | 8                         | 12                       | 14                       | 15                        | 17                           | 18                       |                             |
|                           | APC c.4451A>G<br>p.D1484G | ATM c.998C>T<br>p.S333F    | ATM c.998C>T<br>p.S333F      | ATM c.998C>T<br>p.S333F  | ATM c.998C>T<br>p.S333F   | ATM c.998C>T<br>p.S333F  | ATM c.998C>T<br>p.S333F  | ATM c.998C>T<br>p.S333F   | ATM c.998C>T<br>p.S333F      | ATM c.998C>T<br>p.S333F  |                             |
|                           |                           | AKT1 c.63delC<br>p.T21fs   | NOTCH1 c.7327G>T<br>p.V2443L |                          | TP53 c.628C>T<br>p.R210X  | TP53 c.628C>T<br>p.R210X | EGFR c.872G>A<br>p.C291Y |                           | EGFR c.2092G>A<br>p.A698T    |                          |                             |
|                           |                           |                            |                              |                          |                           | PTEN c.900C>T<br>p.I300I |                          |                           | SMAD4 c.1275delT<br>p.A425fs |                          |                             |
|                           |                           |                            |                              |                          |                           |                          |                          |                           | PDGFRA c.2558G>A<br>p.G853D  |                          |                             |
|                           |                           |                            |                              |                          |                           |                          |                          |                           | SMAD4 c.529C>A<br>p.H177N    |                          |                             |
|                           | Time B                    |                            |                              |                          |                           |                          |                          |                           |                              |                          |                             |
|                           | 2                         | 8                          | 9                            |                          |                           |                          |                          |                           |                              |                          |                             |
|                           | ATM c.998C>T<br>p.S333F   | ATM c.998C>T<br>p.S333F    | TP53 c.628C>T<br>p.R210X     |                          |                           |                          |                          |                           |                              |                          |                             |
| PTEN c.860C>G<br>p.S287X  | PTEN c.860C>G<br>p.S287X  | CDKN2A c.346G>T<br>p.D116Y |                              |                          |                           |                          |                          |                           |                              |                          |                             |
| Time C                    |                           |                            |                              |                          |                           |                          |                          |                           |                              |                          |                             |
| 4                         | 20                        |                            |                              |                          |                           |                          |                          |                           |                              |                          |                             |
| ATM c.998C>T<br>p.S333F   | FLT3 c.1361C>A<br>p.S454X |                            |                              |                          |                           |                          |                          |                           |                              |                          |                             |
| FGFR1 c.545G>A<br>p.S182N | APC c.3067C>A<br>p.Q1023K |                            |                              |                          |                           |                          |                          |                           |                              |                          |                             |
| RB1 c.2264T>C<br>p.F755S  |                           |                            |                              |                          |                           |                          |                          |                           |                              |                          |                             |
| Patient CH30              | Time A                    |                            |                              |                          |                           |                          |                          |                           |                              |                          |                             |
|                           | 1                         | 5                          | 8                            | 4bis                     | 5bis                      | 8bis                     | 15                       | 16                        | 17                           | 15bis                    | 18bis                       |
|                           | MET c.2947C>A<br>p.L983I  | GNA11 c.694C>A<br>p.L232I  | TP53 c.678G>T<br>p.E226D     | RET c.2342A>C<br>p.Q781P | VHL c.407delG<br>p.R136fs | NRAS c.196G>T<br>p.A66S  | ABL c.1057G>T<br>p.E353X | TSC1 c.1444C>T<br>p.P482S | JAK3 c.418C>T<br>p.Q140X     | ABL1 c.772C>A<br>p.R258S | PIK3CA c.1033A>G<br>p.N345D |
|                           | ALK c.3778C>T<br>p.P1260S |                            |                              |                          |                           |                          |                          |                           | ERBB2 c.935C>T<br>p.T312I    |                          | VHL c.411delG<br>p.L137fs   |
|                           | MLH1 c.380C>T<br>p.S127L  |                            |                              |                          |                           |                          |                          |                           |                              |                          | BRAF c.1372A>G<br>p.T458A   |
|                           | Time C                    |                            |                              |                          |                           |                          |                          |                           |                              |                          |                             |
| 1                         | 2                         |                            |                              |                          |                           |                          |                          |                           |                              |                          |                             |

|  |                                       |                                    |                                |
|--|---------------------------------------|------------------------------------|--------------------------------|
|  | <i>HNFI1A</i><br>c.851A>G<br>p.D284G  | <i>JAK3</i> c.406C>T<br>p.H136Y    |                                |
|  | <i>PIK3CA</i><br>c.2699C>G<br>p.S900X | <i>FBXW7</i> c.1122G>T<br>c.G1122T |                                |
|  | Time A                                |                                    |                                |
|  | 1                                     | 2                                  | 5                              |
|  | <i>HNFI1A</i> c.893C>T<br>p.A298V     | <i>AKT1</i> c.49G>A<br>p.E17K      | <i>AKT1</i> c.49G>A<br>p.E17K  |
|  | <i>TP53</i> c.518A>G<br>p.K173R       | <i>TP53</i> c.384delC<br>p.S128fs  | <i>TP53</i> c.73G>T<br>p.V25F  |
|  |                                       | <i>TP53</i> c.384delC<br>p.S128fs  | <i>SMO</i> c.608C>T<br>p.P203L |
|  |                                       | <i>RB1</i> c.1032G>T<br>p.Q344H    |                                |
