# Supplementary material for: Dissecting Molecular Heterogeneity of Circulating Tumor Cells (CTCs) from Metastatic Breast Cancer Patients through Copy Number Aberration (CNA) and Single Nucleotide Variant (SNV) Single Cell Analysis
Source: MDPI journal article supplement (doi:10.3390/cancers14163925), 2022-08-14

**Figure S4.** Copy Number aberration (CNA) plots of the most representative circulating tumor cells (CTCs) for each patient (except for patient CH28). In the x-axis the chromosome number is reported, while the number of copies is reported in the y-axis. Black dots: normal copy number; blue dots: loss; red dots: gain.

### Patient CH29

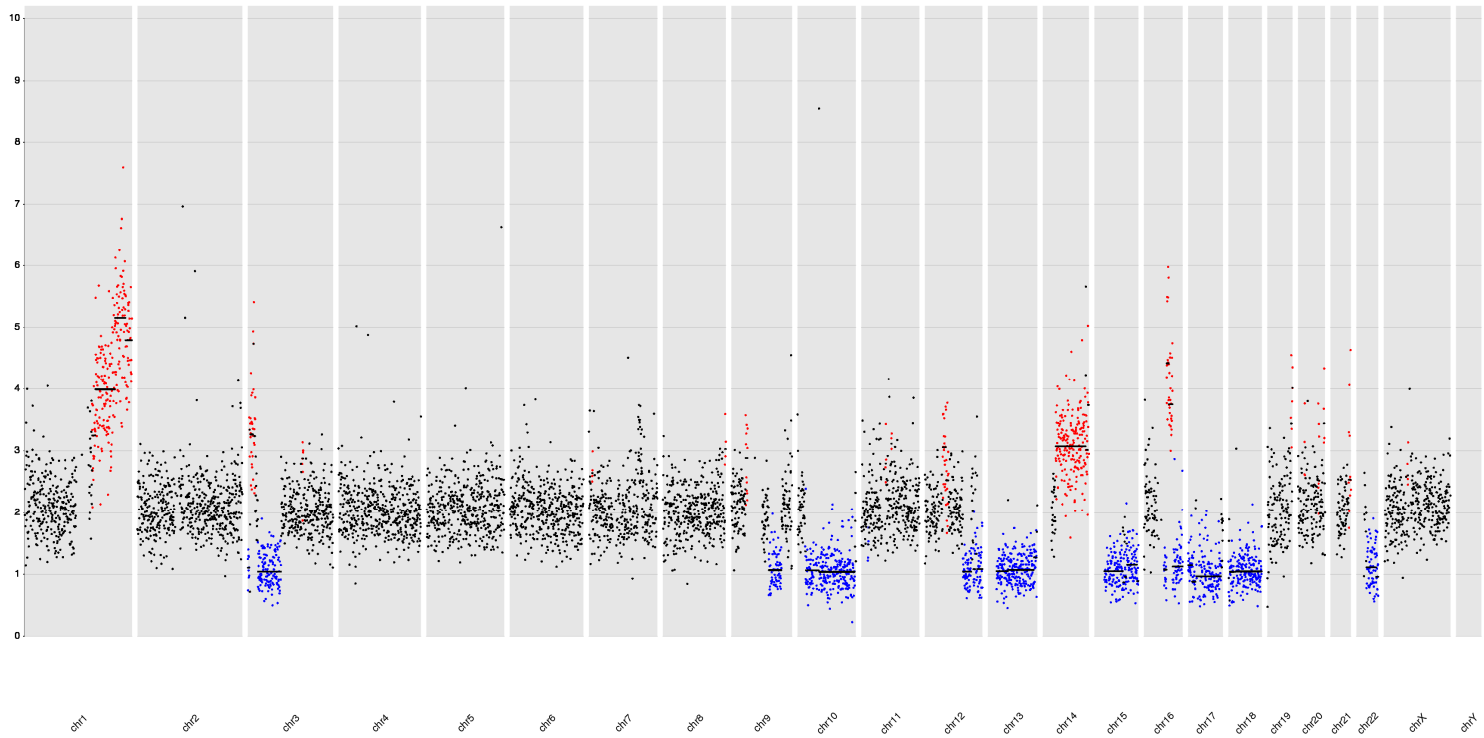

### Patient CH30

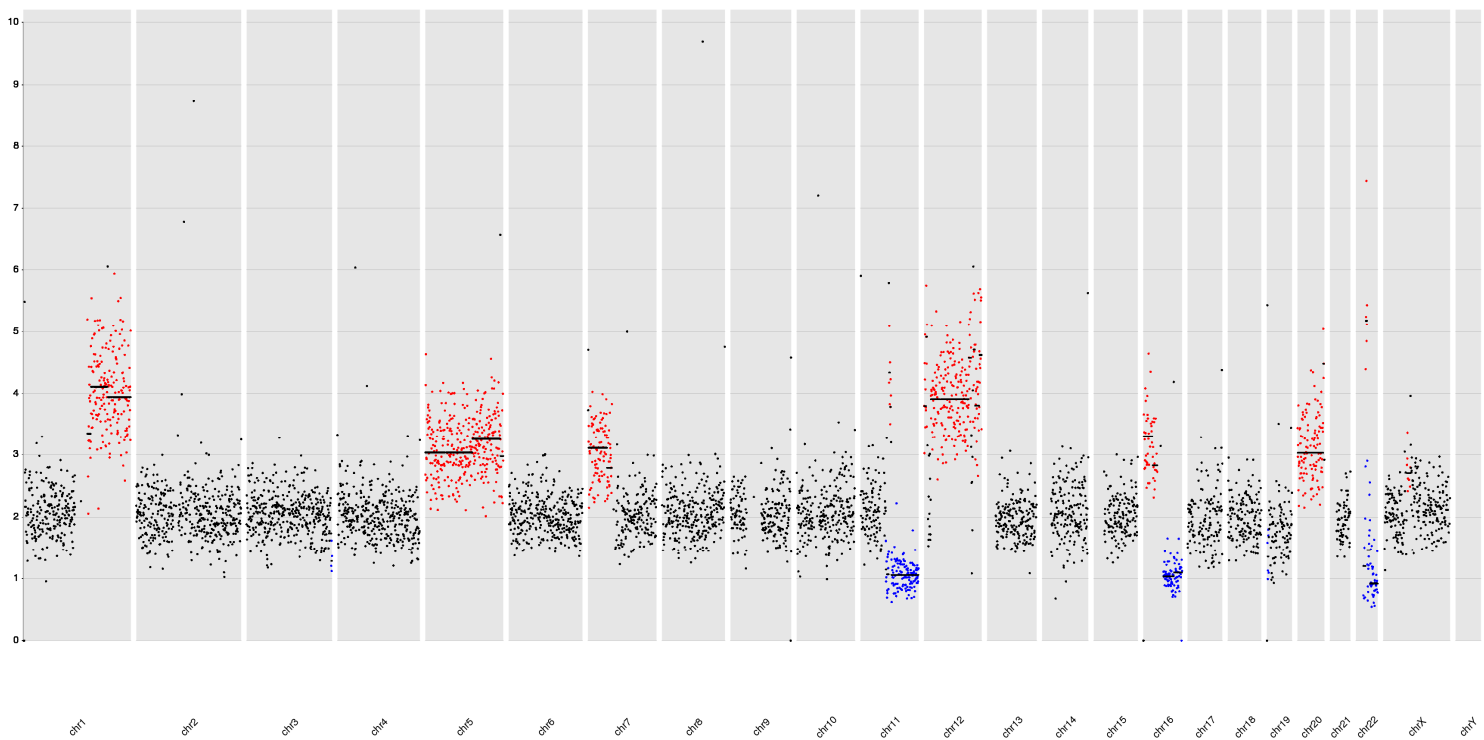

Patient CH32

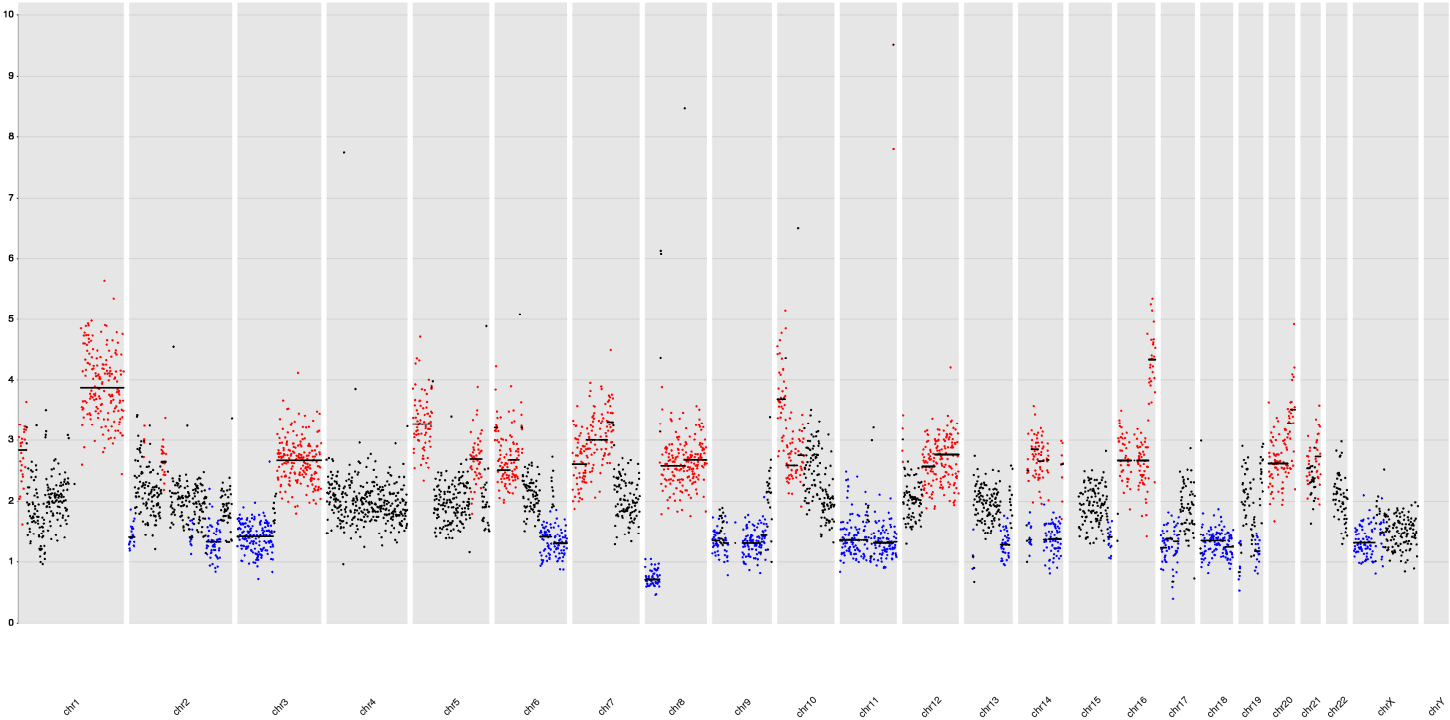

Patient CH46

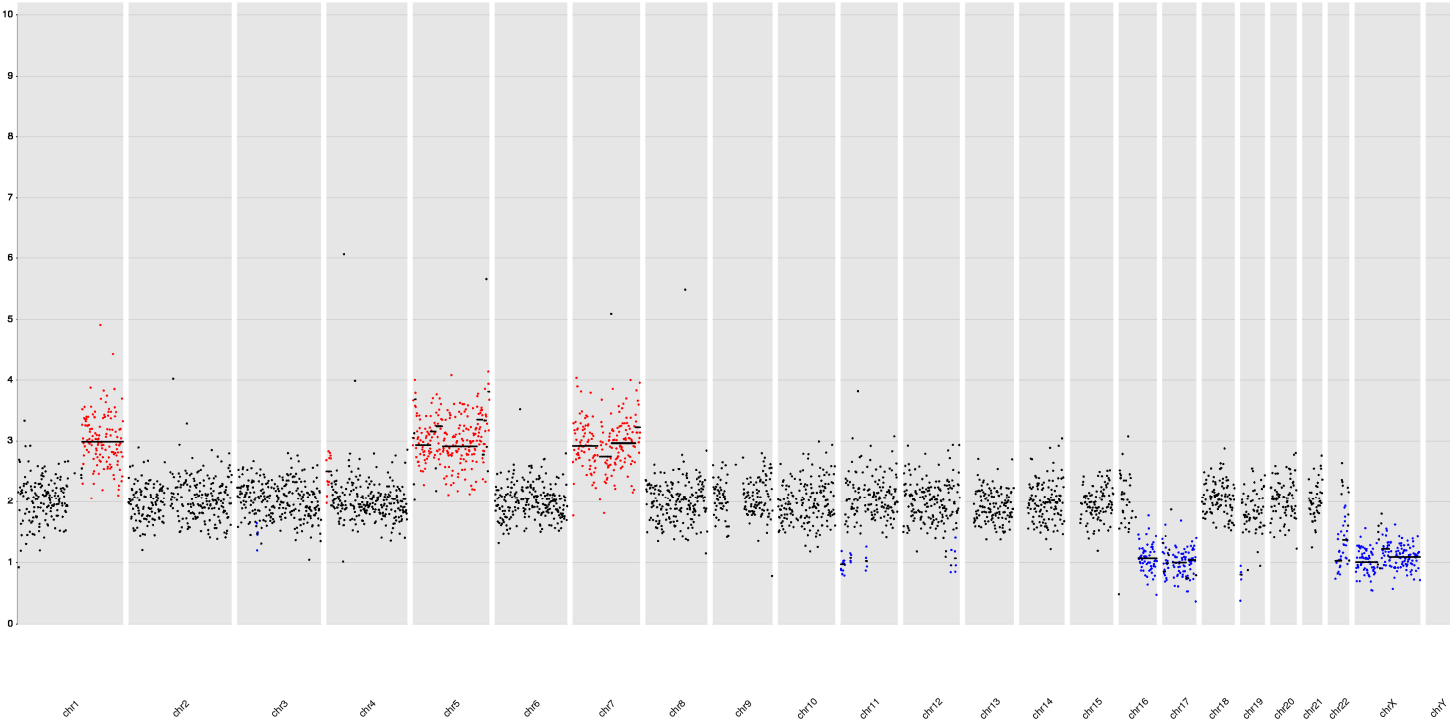

Patient CH47

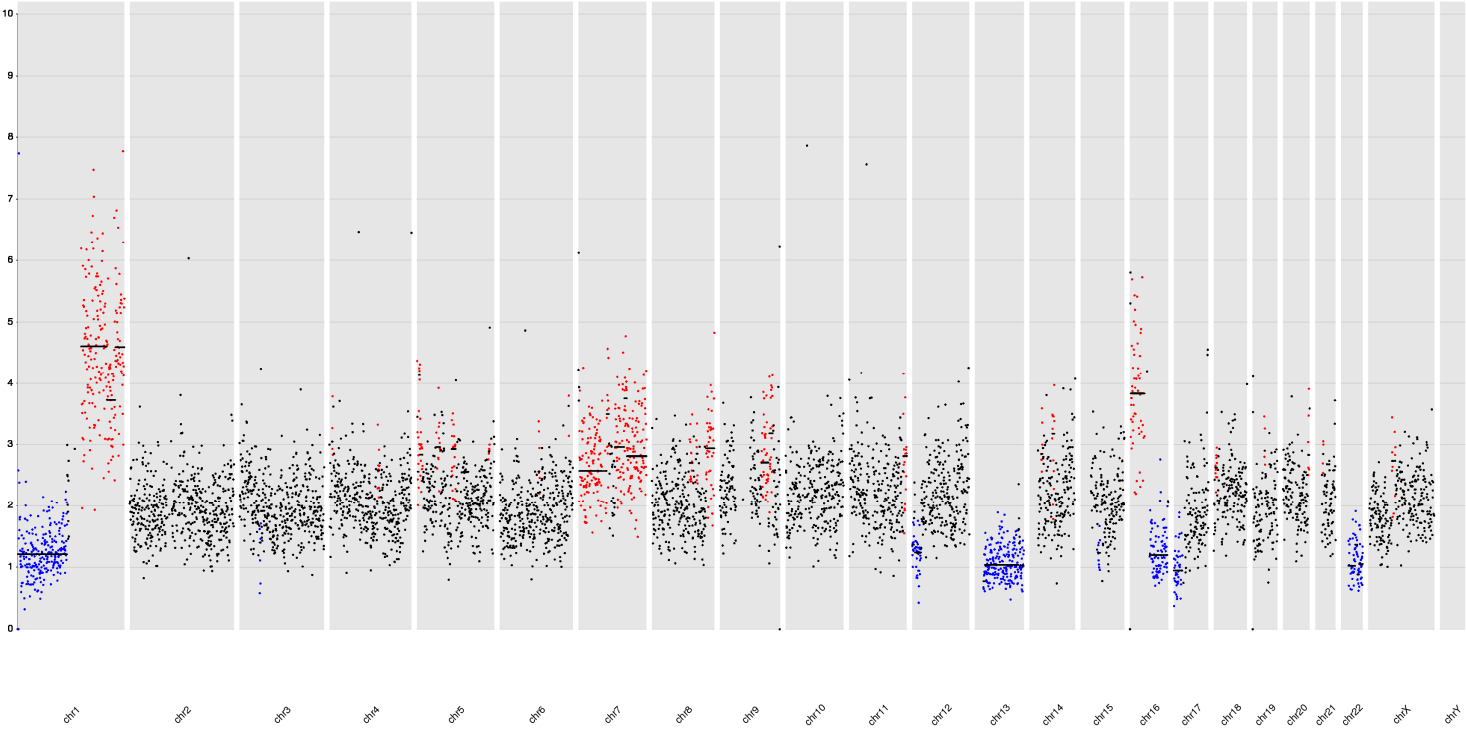

Supplement: s1 [file s1]
