# Supplementary material for: Dissecting Molecular Heterogeneity of Circulating Tumor Cells (CTCs) from Metastatic Breast Cancer Patients through Copy Number Aberration (CNA) and Single Nucleotide Variant (SNV) Single Cell Analysis
Source: Cancers (Basel). 2022 Aug 14;14(16):3925. doi: 10.3390/cancers14163925 (PMC9405921; doi:10.3390/cancers14163925)
Supplement: Supplementary file 1 [file cancers-14-03925-s001.zip]

Archive with 5 entries (5 files):
- Supplementary Material Figure S4.pdf
- Supplementary Material File S1.pdf
- Supplementary Material Table S1.pdf
- Supplementary Material Table S2.xlsx
- Supplementary Material Table S3.xlsx
