# Supplementary material for: Dissecting Molecular Heterogeneity of Circulating Tumor Cells (CTCs) from Metastatic Breast Cancer Patients through Copy Number Aberration (CNA) and Single Nucleotide Variant (SNV) Single Cell Analysis
Source: Cancers (Basel). 2022 Aug 14;14(16):3925. doi: 10.3390/cancers14163925 (PMC9405921; doi:10.3390/cancers14163925)
Supplement: Supplementary file 1 [file cancers-14-03925-s001.zip › Supplementary Material Table S2.xlsx]

## Sheet: General
Database	Enriched term	Number of CTCs
GO_Molecular_Function_2018	olfactory receptor activity (GO:0004984)	9
GO_Molecular_Function_2018	RAGE receptor binding (GO:0050786)	9
GO_Molecular_Function_2018	protein channel activity (GO:0015266)	8
GO_Molecular_Function_2018	ATP binding (GO:0005524)	8
GO_Molecular_Function_2018	peptidyl-proline dioxygenase activity (GO:0031543)	8
GO_Molecular_Function_2018	ATPase binding (GO:0051117)	7
GO_Molecular_Function_2018	transition metal ion binding (GO:0046914)	7
GO_Molecular_Function_2018	zinc ion binding (GO:0008270)	7
GO_Molecular_Function_2018	aspartic-type peptidase activity (GO:0070001)	7
GO_Molecular_Function_2018	purine ribonucleoside triphosphate binding (GO:0035639)	6
GO_Molecular_Function_2018	frizzled binding (GO:0005109)	6
GO_Molecular_Function_2018	mitogen-activated protein kinase binding (GO:0051019)	6
GO_Molecular_Function_2018	CCR chemokine receptor binding (GO:0048020)	6
GO_Molecular_Function_2018	metal ion binding (GO:0046872)	6
GO_Molecular_Function_2018	ephrin receptor binding (GO:0046875)	6
GO_Molecular_Function_2018	histone methyltransferase activity (H3-K36 specific) (GO:0046975)	5
GO_Molecular_Function_2018	inositol trisphosphate kinase activity (GO:0051766)	5
GO_Molecular_Function_2018	serine-type endopeptidase inhibitor activity (GO:0004867)	5
GO_Molecular_Function_2018	peptidyl-proline 4-dioxygenase activity (GO:0031545)	5
GO_Molecular_Function_2018	ubiquitin conjugating enzyme activity (GO:0061631)	5
GO_Molecular_Function_2018	acyl-CoA ligase activity (GO:0003996)	5
GO_Molecular_Function_2018	calmodulin-dependent protein kinase activity (GO:0004683)	5
GO_Molecular_Function_2018	acyl-CoA hydrolase activity (GO:0047617)	4
GO_Molecular_Function_2018	calcium channel inhibitor activity (GO:0019855)	4
GO_Molecular_Function_2018	MHC class I receptor activity (GO:0032393)	4
GO_Molecular_Function_2018	adenyl ribonucleotide binding (GO:0032559)	4
GO_Molecular_Function_2018	ether hydrolase activity (GO:0016803)	4
GO_Molecular_Function_2018	chemokine activity (GO:0008009)	4
GO_Molecular_Function_2018	chemokine receptor binding (GO:0042379)	4
GO_Molecular_Function_2018	water transmembrane transporter activity (GO:0005372)	4
GO_Molecular_Function_2018	water channel activity (GO:0015250)	4
GO_Molecular_Function_2018	ubiquitin protein ligase binding (GO:0031625)	4
GO_Molecular_Function_2018	ubiquitin-like protein ligase binding (GO:0044389)	4
GO_Molecular_Function_2018	transcription coactivator activity (GO:0003713)	4
GO_Molecular_Function_2018	histone deacetylase activity (GO:0004407)	4
GO_Molecular_Function_2018	calcium-dependent cysteine-type endopeptidase activity (GO:0004198)	4
GO_Molecular_Function_2018	ubiquitin-like protein conjugating enzyme activity (GO:0061650)	4
GO_Molecular_Function_2018	protein deacetylase activity (GO:0033558)	4
GO_Molecular_Function_2018	RNA polymerase II transcription factor activity, sequence-specific transcription regulatory region DNA binding (GO:0001133)	4
GO_Molecular_Function_2018	primary amine oxidase activity (GO:0008131)	4
GO_Molecular_Function_2018	calcium ion binding (GO:0005509)	4
GO_Molecular_Function_2018	fatty-acyl-CoA synthase activity (GO:0004321)	4
GO_Molecular_Function_2018	O-acyltransferase activity (GO:0008374)	4
GO_Molecular_Function_2018	vasopressin receptor activity (GO:0005000)	4
GO_Molecular_Function_2018	methylation-dependent protein binding (GO:0140034)	4
GO_Molecular_Function_2018	ATPase activity, coupled to transmembrane movement of substances (GO:0042626)	4
GO_Molecular_Function_2018	P-P-bond-hydrolysis-driven transmembrane transporter activity (GO:0015405)	4
GO_Molecular_Function_2018	RNA stem-loop binding (GO:0035613)	4
GO_Molecular_Function_2018	aspartic-type endopeptidase activity (GO:0004190)	4
GO_Molecular_Function_2018	phospholipase A2 activity (GO:0004623)	4
GO_Molecular_Function_2018	SH3/SH2 adaptor activity (GO:0005070)	4
GO_Molecular_Function_2018	phosphatidylcholine transporter activity (GO:0008525)	4
GO_Molecular_Function_2018	complement receptor activity (GO:0004875)	3
GO_Molecular_Function_2018	sterol esterase activity (GO:0004771)	3
GO_Molecular_Function_2018	retinoic acid receptor binding (GO:0042974)	3
GO_Molecular_Function_2018	syntaxin binding (GO:0019905)	3
GO_Molecular_Function_2018	calcium channel regulator activity (GO:0005246)	3
GO_Molecular_Function_2018	calcium-dependent phospholipid binding (GO:0005544)	3
GO_Molecular_Function_2018	ion channel inhibitor activity (GO:0008200)	3
GO_Molecular_Function_2018	tropomyosin binding (GO:0005523)	3
GO_Molecular_Function_2018	phosphofructokinase activity (GO:0008443)	3
GO_Molecular_Function_2018	protein heterodimerization activity (GO:0046982)	3
GO_Molecular_Function_2018	tRNA (guanine) methyltransferase activity (GO:0016423)	3
GO_Molecular_Function_2018	MHC class II protein binding (GO:0042289)	3
GO_Molecular_Function_2018	adenyl nucleotide binding (GO:0030554)	3
GO_Molecular_Function_2018	adenyl-nucleotide exchange factor activity (GO:0000774)	3
GO_Molecular_Function_2018	adenylyltransferase activity (GO:0070566)	3
GO_Molecular_Function_2018	histone methyltransferase activity (H3-K4 specific) (GO:0042800)	3
GO_Molecular_Function_2018	endopeptidase inhibitor activity (GO:0004866)	3
GO_Molecular_Function_2018	ion antiporter activity (GO:0099516)	3
GO_Molecular_Function_2018	ribonuclease activity (GO:0004540)	3
GO_Molecular_Function_2018	C-acyltransferase activity (GO:0016408)	3
GO_Molecular_Function_2018	arylsulfatase activity (GO:0004065)	3
GO_Molecular_Function_2018	sulfuric ester hydrolase activity (GO:0008484)	3
GO_Molecular_Function_2018	ligand-dependent nuclear receptor transcription coactivator activity (GO:0030374)	3
GO_Molecular_Function_2018	nuclease activity (GO:0004518)	3
GO_Molecular_Function_2018	voltage-gated cation channel activity (GO:0022843)	3
GO_Molecular_Function_2018	cholesterol binding (GO:0015485)	3
GO_Molecular_Function_2018	voltage-gated calcium channel activity (GO:0005245)	3
GO_Molecular_Function_2018	immunoglobulin binding (GO:0019865)	3
GO_Molecular_Function_2018	core promoter sequence-specific DNA binding (GO:0001046)	3
GO_Molecular_Function_2018	high voltage-gated calcium channel activity (GO:0008331)	3
GO_Molecular_Function_2018	leak channel activity (GO:0022840)	3
GO_Molecular_Function_2018	potassium ion leak channel activity (GO:0022841)	3
GO_Molecular_Function_2018	methylated histone binding (GO:0035064)	3
GO_Molecular_Function_2018	endonuclease activity (GO:0004519)	3
GO_Molecular_Function_2018	[heparan sulfate]-glucosamine 3-sulfotransferase 1 activity (GO:0008467)	3
GO_Molecular_Function_2018	histone-lysine N-methyltransferase activity (GO:0018024)	3
GO_Molecular_Function_2018	ATPase activity, coupled to movement of substances (GO:0043492)	3
GO_Molecular_Function_2018	G-protein coupled peptide receptor activity (GO:0008528)	3
GO_Molecular_Function_2018	oxidoreductase activity, acting on single donors with incorporation of molecular oxygen, incorporation of two atoms of oxygen (GO:0016702)	3
GO_Molecular_Function_2018	G-protein beta/gamma-subunit complex binding (GO:0031683)	3
GO_Molecular_Function_2018	palmitoyl-CoA hydrolase activity (GO:0016290)	3
GO_Molecular_Function_2018	calcium-dependent phospholipase A2 activity (GO:0047498)	3
GO_Molecular_Function_2018	ADP-ribosylation factor binding (GO:0030306)	3
GO_Molecular_Function_2018	purinergic receptor activity (GO:0035586)	3
GO_Molecular_Function_2018	extracellular ATP-gated cation channel activity (GO:0004931)	3
GO_Molecular_Function_2018	ATP-gated ion channel activity (GO:0035381)	3
GO_Molecular_Function_2018	nucleotide receptor activity (GO:0016502)	3
GO_Molecular_Function_2018	WW domain binding (GO:0050699)	3
GO_Molecular_Function_2018	phosphatidylinositol transporter activity (GO:0008526)	3
GO_Molecular_Function_2018	GTPase regulator activity (GO:0030695)	3
GO_Molecular_Function_2018	inorganic cation transmembrane transporter activity (GO:0022890)	3
GO_Molecular_Function_2018	RNA binding (GO:0003723)	3
GO_Molecular_Function_2018	GTPase activator activity (GO:0005096)	3
GO_Molecular_Function_2018	Rab GTPase binding (GO:0017137)	3
GO_Molecular_Function_2018	Ras GTPase binding (GO:0017016)	3
GO_Molecular_Function_2018	anion:anion antiporter activity (GO:0015301)	3
GO_Molecular_Function_2018	phosphatidylinositol 3-kinase regulator activity (GO:0035014)	3
GO_Molecular_Function_2018	telomerase RNA binding (GO:0070034)	3
GO_Molecular_Function_2018	hydrolase activity, acting on acid anhydrides, catalyzing transmembrane movement of substances (GO:0016820)	3
GO_Molecular_Function_2018	oxidoreductase activity, oxidizing metal ions, NAD or NADP as acceptor (GO:0016723)	3
GO_Molecular_Function_2018	G-rich strand telomeric DNA binding (GO:0098505)	3
GO_Molecular_Function_2018	actin filament binding (GO:0051015)	2
GO_Molecular_Function_2018	CoA hydrolase activity (GO:0016289)	2
GO_Molecular_Function_2018	protein kinase A regulatory subunit binding (GO:0034237)	2
GO_Molecular_Function_2018	sequence-specific DNA binding (GO:0043565)	2
GO_Molecular_Function_2018	intronic transcription regulatory region sequence-specific DNA binding (GO:0001161)	2
GO_Molecular_Function_2018	NADP-retinol dehydrogenase activity (GO:0052650)	2
GO_Molecular_Function_2018	RNA polymerase II core binding (GO:0000993)	2
GO_Molecular_Function_2018	basal RNA polymerase II transcription machinery binding (GO:0001099)	2
GO_Molecular_Function_2018	potassium ion binding (GO:0030955)	2
GO_Molecular_Function_2018	sodium ion transmembrane transporter activity (GO:0015081)	2
GO_Molecular_Function_2018	prenyltransferase activity (GO:0004659)	2
GO_Molecular_Function_2018	alkali metal ion binding (GO:0031420)	2
GO_Molecular_Function_2018	sodium ion binding (GO:0031402)	2
GO_Molecular_Function_2018	protein serine/threonine kinase activator activity (GO:0043539)	2
GO_Molecular_Function_2018	ATPase regulator activity (GO:0060590)	2
GO_Molecular_Function_2018	chloride channel inhibitor activity (GO:0019869)	2
GO_Molecular_Function_2018	protein homodimerization activity (GO:0042803)	2
GO_Molecular_Function_2018	calcium-dependent protein serine/threonine kinase activity (GO:0009931)	2
GO_Molecular_Function_2018	bitter taste receptor activity (GO:0033038)	2
GO_Molecular_Function_2018	salt transmembrane transporter activity (GO:1901702)	2
GO_Molecular_Function_2018	urate transmembrane transporter activity (GO:0015143)	2
GO_Molecular_Function_2018	cysteine-type endopeptidase inhibitor activity (GO:0004869)	2
GO_Molecular_Function_2018	protease binding (GO:0002020)	2
GO_Molecular_Function_2018	taste receptor activity (GO:0008527)	2
GO_Molecular_Function_2018	inorganic anion transmembrane transporter activity (GO:0015103)	2
GO_Molecular_Function_2018	organic acid transmembrane transporter activity (GO:0005342)	2
GO_Molecular_Function_2018	inorganic anion exchanger activity (GO:0005452)	2
GO_Molecular_Function_2018	sodium-independent organic anion transmembrane transporter activity (GO:0015347)	2
GO_Molecular_Function_2018	pre-mRNA binding (GO:0036002)	2
GO_Molecular_Function_2018	CARD domain binding (GO:0050700)	2
GO_Molecular_Function_2018	caspase binding (GO:0089720)	2
GO_Molecular_Function_2018	sterol binding (GO:0032934)	2
GO_Molecular_Function_2018	cation:amino acid symporter activity (GO:0005416)	2
GO_Molecular_Function_2018	carbonate dehydratase activity (GO:0004089)	2
GO_Molecular_Function_2018	neuropeptide binding (GO:0042923)	2
GO_Molecular_Function_2018	organic anion transmembrane transporter activity (GO:0008514)	2
GO_Molecular_Function_2018	galanin receptor activity (GO:0004966)	2
GO_Molecular_Function_2018	bicarbonate transmembrane transporter activity (GO:0015106)	2
GO_Molecular_Function_2018	ligand-gated sodium channel activity (GO:0015280)	2
GO_Molecular_Function_2018	amide transmembrane transporter activity (GO:0042887)	2
GO_Molecular_Function_2018	MHC protein complex binding (GO:0023023)	2
GO_Molecular_Function_2018	deoxyribonuclease activity (GO:0004536)	2
GO_Molecular_Function_2018	endodeoxyribonuclease activity (GO:0004520)	2
GO_Molecular_Function_2018	CoA-ligase activity (GO:0016405)	2
GO_Molecular_Function_2018	protein-lysine N-methyltransferase activity (GO:0016279)	2
GO_Molecular_Function_2018	LBD domain binding (GO:0050693)	2
GO_Molecular_Function_2018	2-acylglycerol-3-phosphate O-acyltransferase activity (GO:0047144)	2
GO_Molecular_Function_2018	intramolecular oxidoreductase activity, transposing S-S bonds (GO:0016864)	2
GO_Molecular_Function_2018	protein disulfide isomerase activity (GO:0003756)	2
GO_Molecular_Function_2018	tau-protein kinase activity (GO:0050321)	2
GO_Molecular_Function_2018	poly(G) binding (GO:0034046)	2
GO_Molecular_Function_2018	lysine N-methyltransferase activity (GO:0016278)	2
GO_Molecular_Function_2018	heparan sulfate sulfotransferase activity (GO:0034483)	2
GO_Molecular_Function_2018	fatty acid ligase activity (GO:0015645)	2
GO_Molecular_Function_2018	sodium:potassium-exchanging ATPase activity (GO:0005391)	2
GO_Molecular_Function_2018	potassium-transporting ATPase activity (GO:0008556)	2
GO_Molecular_Function_2018	G-protein coupled chemoattractant receptor activity (GO:0001637)	2
GO_Molecular_Function_2018	G-protein coupled receptor binding (GO:0001664)	2
GO_Molecular_Function_2018	nitric-oxide synthase binding (GO:0050998)	2
GO_Molecular_Function_2018	cAMP-dependent protein kinase regulator activity (GO:0008603)	2
GO_Molecular_Function_2018	histone serine kinase activity (GO:0035174)	2
GO_Molecular_Function_2018	channel activity (GO:0015267)	2
GO_Molecular_Function_2018	ATPase activator activity (GO:0001671)	2
GO_Molecular_Function_2018	armadillo repeat domain binding (GO:0070016)	2
GO_Molecular_Function_2018	MHC class II protein complex binding (GO:0023026)	2
GO_Molecular_Function_2018	SUMO transferase activity (GO:0019789)	2
GO_Molecular_Function_2018	DNA-directed 5'-3' RNA polymerase activity (GO:0003899)	2
GO_Molecular_Function_2018	phosphatidylcholine-sterol O-acyltransferase activator activity (GO:0060228)	2
GO_Molecular_Function_2018	Ral GTPase binding (GO:0017160)	2
GO_Molecular_Function_2018	ubiquitin-like protein ligase activity (GO:0061659)	2
GO_Molecular_Function_2018	sequence-specific double-stranded DNA binding (GO:1990837)	2
GO_Molecular_Function_2018	RNA polymerase II regulatory region sequence-specific DNA binding (GO:0000977)	2
GO_Molecular_Function_2018	ammonium transmembrane transporter activity (GO:0008519)	2
GO_Molecular_Function_2018	dicarboxylic acid transmembrane transporter activity (GO:0005310)	2
GO_Molecular_Function_2018	ubiquitin protein ligase activity (GO:0061630)	2
GO_Molecular_Function_2018	phosphatidylcholine 1-acylhydrolase activity (GO:0008970)	2
GO_Molecular_Function_2018	lysophospholipase activity (GO:0004622)	2
GO_Molecular_Function_2018	interleukin-17 receptor activity (GO:0030368)	2
GO_Molecular_Function_2018	chitinase activity (GO:0004568)	2
GO_Molecular_Function_2018	kinesin binding (GO:0019894)	2
GO_Molecular_Function_2018	protein transmembrane transporter activity (GO:0008320)	2
GO_Molecular_Function_2018	peptidoglycan binding (GO:0042834)	2
GO_Molecular_Function_2018	RNA polymerase III activity (GO:0001056)	2
GO_Molecular_Function_2018	single-stranded DNA exodeoxyribonuclease activity (GO:0008297)	2
GO_Molecular_Function_2018	crossover junction endodeoxyribonuclease activity (GO:0008821)	2
GO_Molecular_Function_2018	guanylate kinase activity (GO:0004385)	2
GO_Molecular_Function_2018	double-stranded RNA binding (GO:0003725)	2
GO_Molecular_Function_2018	endoribonuclease activity (GO:0004521)	2
GO_Molecular_Function_2018	G-protein activated inward rectifier potassium channel activity (GO:0015467)	2
GO_Molecular_Function_2018	lipase activator activity (GO:0060229)	2
GO_Molecular_Function_2018	O-methyltransferase activity (GO:0008171)	2
GO_Molecular_Function_2018	sulfate transmembrane transporter activity (GO:0015116)	2
GO_Molecular_Function_2018	protein transporter activity (GO:0008565)	2
GO_Molecular_Function_2018	protein kinase A catalytic subunit binding (GO:0034236)	2
GO_Molecular_Function_2018	hydrogen ion transmembrane transporter activity (GO:0015078)	2
GO_Molecular_Function_2018	cAMP-dependent protein kinase inhibitor activity (GO:0004862)	2
GO_Molecular_Function_2018	single-stranded telomeric DNA binding (GO:0043047)	2
GO_Molecular_Function_2018	ephrin receptor activity (GO:0005003)	2
GO_Molecular_Function_2018	transmembrane-ephrin receptor activity (GO:0005005)	2
GO_Molecular_Function_2018	inward rectifier potassium channel activity (GO:0005242)	2
GO_Molecular_Function_2018	carboxylic ester hydrolase activity (GO:0052689)	2
GO_Molecular_Function_2018	G-protein coupled neurotransmitter receptor activity (GO:0099528)	2
GO_Molecular_Function_2018	G-protein coupled acetylcholine receptor activity (GO:0016907)	2
GO_Molecular_Function_2018	dopamine transmembrane transporter activity (GO:0005329)	2
GO_Molecular_Function_2018	monoamine transmembrane transporter activity (GO:0008504)	2
GO_Molecular_Function_2018	aryl sulfotransferase activity (GO:0004062)	2
GO_Molecular_Function_2018	telomeric DNA binding (GO:0042162)	2
GO_Molecular_Function_2018	mRNA 3'-UTR binding (GO:0003730)	2
GO_Molecular_Function_2018	phosphatidylinositol-3,4,5-trisphosphate binding (GO:0005547)	1
GO_Molecular_Function_2018	SH2 domain binding (GO:0042169)	1
GO_Molecular_Function_2018	adenylate cyclase binding (GO:0008179)	1
GO_Molecular_Function_2018	prostaglandin receptor activity (GO:0004955)	1
GO_Molecular_Function_2018	protein phosphatase binding (GO:0019903)	1
GO_Molecular_Function_2018	calcium activated cation channel activity (GO:0005227)	1
GO_Molecular_Function_2018	DNA ligase activity (GO:0003909)	1
GO_Molecular_Function_2018	type II transforming growth factor beta receptor binding (GO:0005114)	1
GO_Molecular_Function_2018	ion gated channel activity (GO:0022839)	1
GO_Molecular_Function_2018	protein phosphatase activator activity (GO:0072542)	1
GO_Molecular_Function_2018	3-chloroallyl aldehyde dehydrogenase activity (GO:0004028)	1
GO_Molecular_Function_2018	protein phosphatase 2A binding (GO:0051721)	1
GO_Molecular_Function_2018	titin binding (GO:0031432)	1
GO_Molecular_Function_2018	cytokine activity (GO:0005125)	1
GO_Molecular_Function_2018	retinoic acid binding (GO:0001972)	1
GO_Molecular_Function_2018	intermediate filament binding (GO:0019215)	1
GO_Molecular_Function_2018	poly-pyrimidine tract binding (GO:0008187)	1
GO_Molecular_Function_2018	protein serine/threonine/tyrosine kinase activity (GO:0004712)	1
GO_Molecular_Function_2018	retinoid binding (GO:0005501)	1
GO_Molecular_Function_2018	1-phosphatidylinositol-4-phosphate 5-kinase activity (GO:0016308)	1
GO_Molecular_Function_2018	phospholipase activator activity (GO:0016004)	1
GO_Molecular_Function_2018	chromo shadow domain binding (GO:0070087)	1
GO_Molecular_Function_2018	phosphatidylinositol phosphate kinase activity (GO:0016307)	1
GO_Molecular_Function_2018	protein kinase activator activity (GO:0030295)	1
GO_Molecular_Function_2018	neutral amino acid transmembrane transporter activity (GO:0015175)	1
GO_Molecular_Function_2018	sodium:amino acid symporter activity (GO:0005283)	1
GO_Molecular_Function_2018	secondary active transmembrane transporter activity (GO:0015291)	1
GO_Molecular_Function_2018	anion transmembrane transporter activity (GO:0008509)	1
GO_Molecular_Function_2018	alanine transmembrane transporter activity (GO:0022858)	1
GO_Molecular_Function_2018	L-proline transmembrane transporter activity (GO:0015193)	1
GO_Molecular_Function_2018	L-alanine transmembrane transporter activity (GO:0015180)	1
GO_Molecular_Function_2018	NEDD8-specific protease activity (GO:0019784)	1
GO_Molecular_Function_2018	amino acid transmembrane transporter activity (GO:0015171)	1
GO_Molecular_Function_2018	L-amino acid transmembrane transporter activity (GO:0015179)	1
GO_Molecular_Function_2018	dipeptidyl-peptidase activity (GO:0008239)	1
GO_Molecular_Function_2018	anion:cation symporter activity (GO:0015296)	1
GO_Molecular_Function_2018	cysteine-type endopeptidase activity (GO:0004197)	1
GO_Molecular_Function_2018	double-stranded DNA binding (GO:0003690)	1
GO_Molecular_Function_2018	cysteine-type peptidase activity (GO:0008234)	1
GO_Molecular_Function_2018	RNA polymerase II repressing transcription factor binding (GO:0001103)	1
GO_Molecular_Function_2018	metalloendopeptidase activity (GO:0004222)	1
GO_Molecular_Function_2018	activin-activated receptor activity (GO:0017002)	1
GO_Molecular_Function_2018	glycine transmembrane transporter activity (GO:0015187)	1
GO_Molecular_Function_2018	antiporter activity (GO:0015297)	1
GO_Molecular_Function_2018	N-acyltransferase activity (GO:0016410)	1
GO_Molecular_Function_2018	actinin binding (GO:0042805)	1
GO_Molecular_Function_2018	core promoter proximal region sequence-specific DNA binding (GO:0000987)	1
GO_Molecular_Function_2018	growth factor activity (GO:0008083)	1
GO_Molecular_Function_2018	intracellular calcium activated chloride channel activity (GO:0005229)	1
GO_Molecular_Function_2018	intracellular chloride channel activity (GO:0061778)	1
GO_Molecular_Function_2018	ubiquitin-like protein conjugating enzyme binding (GO:0044390)	1
GO_Molecular_Function_2018	neuropeptide receptor activity (GO:0008188)	1
GO_Molecular_Function_2018	GABA-A receptor activity (GO:0004890)	1
GO_Molecular_Function_2018	RNA polymerase II core promoter sequence-specific DNA binding (GO:0000979)	1
GO_Molecular_Function_2018	GABA receptor activity (GO:0016917)	1
GO_Molecular_Function_2018	semaphorin receptor activity (GO:0017154)	1
GO_Molecular_Function_2018	Lys63-specific deubiquitinase activity (GO:0061578)	1
GO_Molecular_Function_2018	acylglycerol O-acyltransferase activity (GO:0016411)	1
GO_Molecular_Function_2018	1-acylglycerol-3-phosphate O-acyltransferase activity (GO:0003841)	1
GO_Molecular_Function_2018	G-protein coupled photoreceptor activity (GO:0008020)	1
GO_Molecular_Function_2018	lysophosphatidic acid acyltransferase activity (GO:0042171)	1
GO_Molecular_Function_2018	death receptor activity (GO:0005035)	1
GO_Molecular_Function_2018	tumor necrosis factor-activated receptor activity (GO:0005031)	1
GO_Molecular_Function_2018	ATPase coupled ion transmembrane transporter activity (GO:0042625)	1
GO_Molecular_Function_2018	Lys48-specific deubiquitinase activity (GO:1990380)	1
GO_Molecular_Function_2018	benzodiazepine receptor activity (GO:0008503)	1
GO_Molecular_Function_2018	transcription factor activity, RNA polymerase II core promoter proximal region sequence-specific binding (GO:0000982)	1
GO_Molecular_Function_2018	protein methyltransferase activity (GO:0008276)	1
GO_Molecular_Function_2018	transcriptional activator activity, RNA polymerase II transcription regulatory region sequence-specific binding (GO:0001228)	1
GO_Molecular_Function_2018	calcium channel activity (GO:0005262)	1
GO_Molecular_Function_2018	pre-mRNA 3'-splice site binding (GO:0030628)	1
GO_Molecular_Function_2018	GDP-dissociation inhibitor activity (GO:0005092)	1
GO_Molecular_Function_2018	phosphatidylinositol-3,5-bisphosphate phosphatase activity (GO:0106018)	1
GO_Molecular_Function_2018	microfilament motor activity (GO:0000146)	1
GO_Molecular_Function_2018	O-acetyltransferase activity (GO:0016413)	1
GO_Molecular_Function_2018	hyalurononglucosaminidase activity (GO:0004415)	1
GO_Molecular_Function_2018	histone methyltransferase activity (GO:0042054)	1
GO_Molecular_Function_2018	substrate-specific channel activity (GO:0022838)	1
GO_Molecular_Function_2018	SUMO-specific protease activity (GO:0016929)	1
GO_Molecular_Function_2018	vascular endothelial growth factor-activated receptor activity (GO:0005021)	1
GO_Molecular_Function_2018	transcriptional repressor activity, RNA polymerase II activating transcription factor binding (GO:0098811)	1
GO_Molecular_Function_2018	kinase inhibitor activity (GO:0019210)	1
GO_Molecular_Function_2018	organic acid:sodium symporter activity (GO:0005343)	1
GO_Molecular_Function_2018	transforming growth factor beta binding (GO:0050431)	1
GO_Molecular_Function_2018	histone kinase activity (GO:0035173)	1
GO_Molecular_Function_2018	MHC class II receptor activity (GO:0032395)	1
GO_Molecular_Function_2018	DNA polymerase binding (GO:0070182)	1
GO_Molecular_Function_2018	ATPase activity (GO:0016887)	1
GO_Molecular_Function_2018	MHC class I protein binding (GO:0042288)	1
GO_Molecular_Function_2018	nucleoside-triphosphatase activity (GO:0017111)	1
GO_Molecular_Function_2018	ATPase activity, coupled (GO:0042623)	1
GO_Molecular_Function_2018	cholesterol transporter activity (GO:0017127)	1
GO_Molecular_Function_2018	motor activity (GO:0003774)	1
GO_Molecular_Function_2018	U6 snRNA binding (GO:0017070)	1
GO_Molecular_Function_2018	transcription regulatory region sequence-specific DNA binding (GO:0000976)	1
GO_Molecular_Function_2018	transcriptional activator activity, RNA polymerase II distal enhancer sequence-specific binding (GO:0001205)	1
GO_Molecular_Function_2018	alpha-sialidase activity (GO:0016997)	1
GO_Molecular_Function_2018	exo-alpha-sialidase activity (GO:0004308)	1
GO_Molecular_Function_2018	retinoid X receptor binding (GO:0046965)	1
GO_Molecular_Function_2018	complement component C1q binding (GO:0001849)	1
GO_Molecular_Function_2018	RNA polymerase II transcription corepressor activity (GO:0001106)	1
GO_Molecular_Function_2018	MHC protein binding (GO:0042287)	1
GO_Molecular_Function_2018	RNA polymerase II regulatory region DNA binding (GO:0001012)	1
GO_Molecular_Function_2018	divalent inorganic cation transmembrane transporter activity (GO:0072509)	1
GO_Molecular_Function_2018	polyubiquitin modification-dependent protein binding (GO:0031593)	1
GO_Molecular_Function_2018	C4-dicarboxylate transmembrane transporter activity (GO:0015556)	1
GO_Molecular_Function_2018	lipoprotein particle receptor binding (GO:0070325)	1
GO_Molecular_Function_2018	single-stranded DNA binding (GO:0003697)	1
GO_Molecular_Function_2018	zinc ion transmembrane transporter activity (GO:0005385)	1
GO_Molecular_Function_2018	hydrolase activity, acting on carbon-nitrogen (but not peptide) bonds, in linear amides (GO:0016811)	1
GO_Molecular_Function_2018	calcium-dependent protein serine/threonine phosphatase activity (GO:0004723)	1
GO_Molecular_Function_2018	tRNA methyltransferase activity (GO:0008175)	1
GO_Molecular_Function_2018	sequence-specific mRNA binding (GO:1990825)	1
GO_Molecular_Function_2018	transcriptional repressor activity, RNA polymerase II core promoter proximal region sequence-specific binding (GO:0001078)	1
GO_Molecular_Function_2018	peptidase activity, acting on L-amino acid peptides (GO:0070011)	1
GO_Molecular_Function_2018	protein serine/threonine kinase activity (GO:0004674)	1
GO_Molecular_Function_2018	GABA receptor binding (GO:0050811)	1
GO_Molecular_Function_2018	oxidoreductase activity, acting on paired donors, with incorporation or reduction of molecular oxygen, 2-oxoglutarate as one donor, and incorporation of one atom each of oxygen into both donors (GO:0016706)	1
GO_Molecular_Function_2018	muscle alpha-actinin binding (GO:0051371)	1
GO_Molecular_Function_2018	DNA secondary structure binding (GO:0000217)	1
GO_Molecular_Function_2018	microtubule minus-end binding (GO:0051011)	1
GO_Molecular_Function_2018	calcium ion transmembrane transporter activity (GO:0015085)	1
GO_Molecular_Function_2018	phosphoprotein phosphatase activity (GO:0004721)	1
GO_Molecular_Function_2018	arylesterase activity (GO:0004064)	1
GO_Molecular_Function_2018	hydro-lyase activity (GO:0016836)	1
GO_Molecular_Function_2018	sulfurtransferase activity (GO:0016783)	1
GO_Molecular_Function_2018	phosphatidylinositol binding (GO:0035091)	1
GO_Molecular_Function_2018	glutathione transferase activity (GO:0004364)	1
GO_Molecular_Function_2018	lipoprotein transporter activity (GO:0042954)	1
GO_Molecular_Function_2018	proton-transporting ATPase activity, rotational mechanism (GO:0046961)	1
GO_Molecular_Function_2018	Arp2/3 complex binding (GO:0071933)	1
GO_Molecular_Function_2018	transcriptional repressor activity, RNA polymerase II transcription regulatory region sequence-specific binding (GO:0001227)	1
GO_Molecular_Function_2018	voltage-gated potassium channel activity involved in ventricular cardiac muscle cell action potential repolarization (GO:1902282)	1
GO_Molecular_Function_2018	hydrogen-exporting ATPase activity (GO:0036442)	1
GO_Molecular_Function_2018	ribonuclease P activity (GO:0004526)	1
GO_Molecular_Function_2018	hydrogen-exporting ATPase activity, phosphorylative mechanism (GO:0008553)	1
GO_Molecular_Function_2018	superoxide-generating NADPH oxidase activator activity (GO:0016176)	1
GO_Molecular_Function_2018	DNA N-glycosylase activity (GO:0019104)	1
GO_Molecular_Function_2018	NADPH binding (GO:0070402)	1
GO_Molecular_Function_2018	dipeptidase activity (GO:0016805)	1
GO_Molecular_Function_2018	histone deacetylase binding (GO:0042826)	1
GO_Molecular_Function_2018	cytochrome-b5 reductase activity, acting on NAD(P)H (GO:0004128)	1
GO_Molecular_Function_2018	dynein complex binding (GO:0070840)	1
GO_Molecular_Function_2018	single-stranded RNA binding (GO:0003727)	1
GO_Molecular_Function_2018	ionotropic glutamate receptor binding (GO:0035255)	1
GO_Molecular_Function_2018	beta-tubulin binding (GO:0048487)	1
GO_Molecular_Function_2018	N-acetylglucosamine 6-O-sulfotransferase activity (GO:0001517)	1
GO_Molecular_Function_2018	tubulin binding (GO:0015631)	1
GO_Molecular_Function_2018	ion transmembrane transporter activity (GO:0015075)	1
GO_Molecular_Function_2018	Rac GTPase binding (GO:0048365)	1
GO_Molecular_Function_2018	RNA helicase activity (GO:0003724)	1
GO_Molecular_Function_2018	ATP-dependent RNA helicase activity (GO:0004004)	1
GO_Molecular_Function_2018	RNA-dependent ATPase activity (GO:0008186)	1
GO_Molecular_Function_2018	ligand-gated ion channel activity (GO:0015276)	1
GO_Molecular_Function_2018	phosphatidylinositol phosphate binding (GO:1901981)	1
GO_Molecular_Function_2018	chloride transmembrane transporter activity (GO:0015108)	1
GO_Molecular_Function_2018	oxalate transmembrane transporter activity (GO:0019531)	1
GO_Molecular_Function_2018	chloride channel activity (GO:0005254)	1
GO_Molecular_Function_2018	hydrogen:amino acid symporter activity (GO:0005280)	1
GO_Molecular_Function_2018	monovalent inorganic cation transmembrane transporter activity (GO:0015077)	1
GO_Molecular_Function_2018	carboxylic acid transmembrane transporter activity (GO:0046943)	1
GO_Molecular_Function_2018	RNA polymerase II activity (GO:0001055)	1
GO_Molecular_Function_2018	anion channel activity (GO:0005253)	1
GO_Molecular_Function_2018	actin binding (GO:0003779)	1
GO_Molecular_Function_2018	ATP-dependent microtubule motor activity (GO:1990939)	1
GO_Molecular_Function_2018	inhibitory extracellular ligand-gated ion channel activity (GO:0005237)	1
GO_Molecular_Function_2018	ligand-gated anion channel activity (GO:0099095)	1
GO_Molecular_Function_2018	calcium-dependent protein kinase activity (GO:0010857)	1
GO_Molecular_Function_2018	ankyrin binding (GO:0030506)	1
GO_Molecular_Function_2018	small GTPase binding (GO:0031267)	1
GO_Molecular_Function_2018	pseudouridine synthase activity (GO:0009982)	1
GO_Molecular_Function_2018	lipoprotein particle binding (GO:0071813)	1
GO_Molecular_Function_2018	voltage-gated ion channel activity involved in regulation of postsynaptic membrane potential (GO:1905030)	1
GO_Molecular_Function_2018	voltage-gated sodium channel activity (GO:0005248)	1
GO_Molecular_Function_2018	sterol transporter activity (GO:0015248)	1
GO_Molecular_Function_2018	ATPase activity, coupled to transmembrane movement of ions, rotational mechanism (GO:0044769)	1
GO_Molecular_Function_2018	glucosyltransferase activity (GO:0046527)	1
GO_Molecular_Function_2018	cysteine-type endopeptidase activity involved in execution phase of apoptosis (GO:0097200)	1
GO_Molecular_Function_2018	excitatory extracellular ligand-gated ion channel activity (GO:0005231)	1
GO_Molecular_Function_2018	ubiquitin-protein transferase activity (GO:0004842)	1
GO_Molecular_Function_2018	protein serine/threonine kinase inhibitor activity (GO:0030291)	1
GO_Molecular_Function_2018	interleukin-1 receptor binding (GO:0005149)	1
GO_Molecular_Function_2018	sulfotransferase activity (GO:0008146)	1
GO_Molecular_Function_2018	hyaluronic acid binding (GO:0005540)	1
GO_Molecular_Function_2018	core promoter binding (GO:0001047)	1
GO_Molecular_Function_2018	myosin binding (GO:0017022)	1
GO_Molecular_Function_2018	transcriptional activator activity, RNA polymerase II core promoter proximal region sequence-specific binding (GO:0001077)	1
GO_Molecular_Function_2018	ATP-dependent helicase activity (GO:0008026)	1
GO_Molecular_Function_2018	serotonin receptor activity (GO:0099589)	1
GO_Molecular_Function_2018	G-protein coupled serotonin receptor activity (GO:0004993)	1
GO_Molecular_Function_2018	mRNA 5'-UTR binding (GO:0048027)	1
GO_Molecular_Function_2018	glycine binding (GO:0016594)	1
GO_Molecular_Function_2018	RNA polymerase II core promoter proximal region sequence-specific DNA binding (GO:0000978)	1
GO_Molecular_Function_2018	potassium:proton antiporter activity (GO:0015386)	1
GO_Molecular_Function_2018	phospholipid-translocating ATPase activity (GO:0004012)	1
GO_Molecular_Function_2018	natural killer cell lectin-like receptor binding (GO:0046703)	1
GO_Molecular_Function_2018	neurotrophin binding (GO:0043121)	1
GO_Molecular_Function_2018	glucose:sodium symporter activity (GO:0005412)	1
GO_Molecular_Function_2018	glucose transmembrane transporter activity (GO:0005355)	1
GO_Molecular_Function_2018	macromolecule transmembrane transporter activity (GO:0022884)	1
GO_Molecular_Function_2018	peptide transmembrane transporter activity (GO:1904680)	1
GO_Molecular_Function_2018	phosphotransferase activity, phosphate group as acceptor (GO:0016776)	1
GO_Molecular_Function_2018	phospholipase activity (GO:0004620)	1
GO_Molecular_Function_2018	aldo-keto reductase (NADP) activity (GO:0004033)	1
GO_Molecular_Function_2018	transmembrane receptor protein tyrosine phosphatase activity (GO:0005001)	1
GO_Molecular_Function_2018	transmembrane receptor protein phosphatase activity (GO:0019198)	1
GO_Molecular_Function_2018	hydrolase activity, acting on carbon-nitrogen (but not peptide) bonds, in linear amidines (GO:0016813)	1
GO_Molecular_Function_2018	GTPase binding (GO:0051020)	1
GO_Molecular_Function_2018	protein tyrosine phosphatase activity (GO:0004725)	1
GO_Molecular_Function_2018	flap endonuclease activity (GO:0048256)	1
GO_Molecular_Function_2018	acid-thiol ligase activity (GO:0016878)	1
GO_Molecular_Function_2018	leucine zipper domain binding (GO:0043522)	1
GO_Molecular_Function_2018	histone acetyltransferase activity (GO:0004402)	1
GO_Molecular_Function_2018	peptide-lysine-N-acetyltransferase activity (GO:0061733)	1
GO_Molecular_Function_2018	phosphate ion binding (GO:0042301)	1
GO_Molecular_Function_2018	LRR domain binding (GO:0030275)	1
GO_Molecular_Function_2018	copper ion binding (GO:0005507)	1
GO_Molecular_Function_2018	3'-5'-exodeoxyribonuclease activity (GO:0008296)	1
GO_Molecular_Function_2018	JUN kinase binding (GO:0008432)	1
GO_Molecular_Function_2018	aldehyde dehydrogenase [NAD(P)+] activity (GO:0004030)	1
GO_Molecular_Function_2018	endodeoxyribonuclease activity, producing 3'-phosphomonoesters (GO:0016889)	1
GO_Molecular_Function_2018	NADH dehydrogenase activity (GO:0003954)	1
GO_Molecular_Function_2018	NAADP-sensitive calcium-release channel activity (GO:0072345)	1
GO_Molecular_Function_2018	endodeoxyribonuclease activity, producing 5'-phosphomonoesters (GO:0016888)	1
GO_Molecular_Function_2018	GTP-Rho binding (GO:0017049)	1
GO_Cellular_Component_2018	pseudopodium (GO:0031143)	9
GO_Cellular_Component_2018	spindle midzone (GO:0051233)	7
GO_Cellular_Component_2018	telomerase holoenzyme complex (GO:0005697)	7
GO_Cellular_Component_2018	condensed chromosome kinetochore (GO:0000777)	6
GO_Cellular_Component_2018	ficolin-1-rich granule membrane (GO:0101003)	5
GO_Cellular_Component_2018	tertiary granule (GO:0070820)	5
GO_Cellular_Component_2018	platelet alpha granule lumen (GO:0031093)	5
GO_Cellular_Component_2018	platelet alpha granule (GO:0031091)	5
GO_Cellular_Component_2018	myofibril (GO:0030016)	5
GO_Cellular_Component_2018	nuclear transcription factor complex (GO:0044798)	5
GO_Cellular_Component_2018	integral component of mitochondrial membrane (GO:0032592)	5
GO_Cellular_Component_2018	intrinsic component of the cytoplasmic side of the plasma membrane (GO:0031235)	5
GO_Cellular_Component_2018	perinuclear region of cytoplasm (GO:0048471)	5
GO_Cellular_Component_2018	cytoskeleton (GO:0005856)	5
GO_Cellular_Component_2018	microtubule minus-end (GO:0036449)	4
GO_Cellular_Component_2018	MLL1/2 complex (GO:0044665)	4
GO_Cellular_Component_2018	MLL1 complex (GO:0071339)	4
GO_Cellular_Component_2018	STAGA complex (GO:0030914)	4
GO_Cellular_Component_2018	kinesin complex (GO:0005871)	4
GO_Cellular_Component_2018	DNA-directed RNA polymerase complex (GO:0000428)	4
GO_Cellular_Component_2018	manchette (GO:0002177)	4
GO_Cellular_Component_2018	cation channel complex (GO:0034703)	3
GO_Cellular_Component_2018	mitotic spindle midzone (GO:1990023)	3
GO_Cellular_Component_2018	node of Ranvier (GO:0033268)	3
GO_Cellular_Component_2018	U2-type prespliceosome (GO:0071004)	3
GO_Cellular_Component_2018	striated muscle thin filament (GO:0005865)	3
GO_Cellular_Component_2018	axon initial segment (GO:0043194)	3
GO_Cellular_Component_2018	polymeric cytoskeletal fiber (GO:0099513)	3
GO_Cellular_Component_2018	intermediate filament cytoskeleton (GO:0045111)	3
GO_Cellular_Component_2018	nuclear inclusion body (GO:0042405)	3
GO_Cellular_Component_2018	AIM2 inflammasome complex (GO:0097169)	3
GO_Cellular_Component_2018	IPAF inflammasome complex (GO:0072557)	3
GO_Cellular_Component_2018	NLRP3 inflammasome complex (GO:0072559)	3
GO_Cellular_Component_2018	main axon (GO:0044304)	3
GO_Cellular_Component_2018	lipid droplet (GO:0005811)	3
GO_Cellular_Component_2018	L-type voltage-gated calcium channel complex (GO:1990454)	3
GO_Cellular_Component_2018	AMPA glutamate receptor complex (GO:0032281)	3
GO_Cellular_Component_2018	gamma-secretase complex (GO:0070765)	3
GO_Cellular_Component_2018	actin filament (GO:0005884)	3
GO_Cellular_Component_2018	T cell receptor complex (GO:0042101)	3
GO_Cellular_Component_2018	integral component of nuclear inner membrane (GO:0005639)	3
GO_Cellular_Component_2018	actin cytoskeleton (GO:0015629)	3
GO_Cellular_Component_2018	U1 snRNP (GO:0005685)	2
GO_Cellular_Component_2018	Golgi stack (GO:0005795)	2
GO_Cellular_Component_2018	membrane raft (GO:0045121)	2
GO_Cellular_Component_2018	actomyosin (GO:0042641)	2
GO_Cellular_Component_2018	spectrin-associated cytoskeleton (GO:0014731)	2
GO_Cellular_Component_2018	Ino80 complex (GO:0031011)	2
GO_Cellular_Component_2018	intercalated disc (GO:0014704)	2
GO_Cellular_Component_2018	intermediate filament (GO:0005882)	2
GO_Cellular_Component_2018	keratin filament (GO:0045095)	2
GO_Cellular_Component_2018	nuclear DNA-directed RNA polymerase complex (GO:0055029)	2
GO_Cellular_Component_2018	early phagosome (GO:0032009)	2
GO_Cellular_Component_2018	nuclear nucleosome (GO:0000788)	2
GO_Cellular_Component_2018	microtubule cytoskeleton (GO:0015630)	2
GO_Cellular_Component_2018	RNA polymerase II transcription factor complex (GO:0090575)	2
GO_Cellular_Component_2018	condensed chromosome, centromeric region (GO:0000779)	2
GO_Cellular_Component_2018	catenin complex (GO:0016342)	2
GO_Cellular_Component_2018	signal recognition particle (GO:0048500)	2
GO_Cellular_Component_2018	spherical high-density lipoprotein particle (GO:0034366)	2
GO_Cellular_Component_2018	contractile fiber (GO:0043292)	2
GO_Cellular_Component_2018	early endosome membrane (GO:0031901)	2
GO_Cellular_Component_2018	early endosome (GO:0005769)	2
GO_Cellular_Component_2018	P granule (GO:0043186)	2
GO_Cellular_Component_2018	Cul4-RING E3 ubiquitin ligase complex (GO:0080008)	2
GO_Cellular_Component_2018	cytoplasmic ribonucleoprotein granule (GO:0036464)	2
GO_Cellular_Component_2018	intrinsic component of mitochondrial inner membrane (GO:0031304)	2
GO_Cellular_Component_2018	nuclear body (GO:0016604)	2
GO_Cellular_Component_2018	integral component of mitochondrial inner membrane (GO:0031305)	2
GO_Cellular_Component_2018	actin cortical patch (GO:0030479)	2
GO_Cellular_Component_2018	endocytic patch (GO:0061645)	2
GO_Cellular_Component_2018	nuclear telomere cap complex (GO:0000783)	2
GO_Cellular_Component_2018	septin cytoskeleton (GO:0032156)	2
GO_Cellular_Component_2018	septin ring (GO:0005940)	2
GO_Cellular_Component_2018	septin filament array (GO:0032160)	2
GO_Cellular_Component_2018	autophagosome (GO:0005776)	2
GO_Cellular_Component_2018	autophagosome membrane (GO:0000421)	2
GO_Cellular_Component_2018	nuclear speck (GO:0016607)	2
GO_Cellular_Component_2018	microtubule end (GO:1990752)	1
GO_Cellular_Component_2018	precatalytic spliceosome (GO:0071011)	1
GO_Cellular_Component_2018	U4 snRNP (GO:0005687)	1
GO_Cellular_Component_2018	methylosome (GO:0034709)	1
GO_Cellular_Component_2018	mitotic spindle pole (GO:0097431)	1
GO_Cellular_Component_2018	ionotropic glutamate receptor complex (GO:0008328)	1
GO_Cellular_Component_2018	commitment complex (GO:0000243)	1
GO_Cellular_Component_2018	centrosome (GO:0005813)	1
GO_Cellular_Component_2018	endoplasmic reticulum-Golgi intermediate compartment membrane (GO:0033116)	1
GO_Cellular_Component_2018	polysome (GO:0005844)	1
GO_Cellular_Component_2018	SWI/SNF complex (GO:0016514)	1
GO_Cellular_Component_2018	npBAF complex (GO:0071564)	1
GO_Cellular_Component_2018	integral component of plasma membrane (GO:0005887)	1
GO_Cellular_Component_2018	mRNA cleavage and polyadenylation specificity factor complex (GO:0005847)	1
GO_Cellular_Component_2018	endoribonuclease complex (GO:1902555)	1
GO_Cellular_Component_2018	mitochondrial inner membrane presequence translocase complex (GO:0005744)	1
GO_Cellular_Component_2018	platelet dense granule (GO:0042827)	1
GO_Cellular_Component_2018	anchored component of external side of plasma membrane (GO:0031362)	1
GO_Cellular_Component_2018	HAUS complex (GO:0070652)	1
GO_Cellular_Component_2018	GABA-A receptor complex (GO:1902711)	1
GO_Cellular_Component_2018	ATP-binding cassette (ABC) transporter complex (GO:0043190)	1
GO_Cellular_Component_2018	Golgi lumen (GO:0005796)	1
GO_Cellular_Component_2018	messenger ribonucleoprotein complex (GO:1990124)	1
GO_Cellular_Component_2018	spindle pole centrosome (GO:0031616)	1
GO_Cellular_Component_2018	axonal growth cone (GO:0044295)	1
GO_Cellular_Component_2018	endoplasmic reticulum quality control compartment (GO:0044322)	1
GO_Cellular_Component_2018	MLL3/4 complex (GO:0044666)	1
GO_Cellular_Component_2018	insulin-responsive compartment (GO:0032593)	1
GO_Cellular_Component_2018	INO80-type complex (GO:0097346)	1
GO_Cellular_Component_2018	condensed nuclear chromosome, centromeric region (GO:0000780)	1
GO_Cellular_Component_2018	ficolin-1-rich granule (GO:0101002)	1
GO_Cellular_Component_2018	MHC protein complex (GO:0042611)	1
GO_Cellular_Component_2018	MHC class II protein complex (GO:0042613)	1
GO_Cellular_Component_2018	ER to Golgi transport vesicle membrane (GO:0012507)	1
GO_Cellular_Component_2018	integral component of lumenal side of endoplasmic reticulum membrane (GO:0071556)	1
GO_Cellular_Component_2018	COPII-coated ER to Golgi transport vesicle (GO:0030134)	1
GO_Cellular_Component_2018	integral component of endoplasmic reticulum membrane (GO:0030176)	1
GO_Cellular_Component_2018	mitochondrial small ribosomal subunit (GO:0005763)	1
GO_Cellular_Component_2018	recycling endosome (GO:0055037)	1
GO_Cellular_Component_2018	recycling endosome membrane (GO:0055038)	1
GO_Cellular_Component_2018	trans-Golgi network (GO:0005802)	1
GO_Cellular_Component_2018	micro-ribonucleoprotein complex (GO:0035068)	1
GO_Cellular_Component_2018	DNA-directed RNA polymerase II, holoenzyme (GO:0016591)	1
GO_Cellular_Component_2018	nucleoplasm part (GO:0044451)	1
GO_Cellular_Component_2018	U4/U6 x U5 tri-snRNP complex (GO:0046540)	1
GO_Cellular_Component_2018	small ribosomal subunit (GO:0015935)	1
GO_Cellular_Component_2018	sarcoplasmic reticulum (GO:0016529)	1
GO_Cellular_Component_2018	clathrin-coated endocytic vesicle membrane (GO:0030669)	1
GO_Cellular_Component_2018	condensed nuclear chromosome kinetochore (GO:0000778)	1
GO_Cellular_Component_2018	clathrin-coated endocytic vesicle (GO:0045334)	1
GO_Cellular_Component_2018	primary lysosome (GO:0005766)	1
GO_Cellular_Component_2018	H3 histone acetyltransferase complex (GO:0070775)	1
GO_Cellular_Component_2018	MOZ/MORF histone acetyltransferase complex (GO:0070776)	1
GO_Cellular_Component_2018	smooth endoplasmic reticulum (GO:0005790)	1
GO_Cellular_Component_2018	COPII vesicle coat (GO:0030127)	1
GO_Cellular_Component_2018	germ plasm (GO:0060293)	1
GO_Cellular_Component_2018	Set1C/COMPASS complex (GO:0048188)	1
GO_Cellular_Component_2018	secretory granule lumen (GO:0034774)	1
GO_Cellular_Component_2018	Cdc73/Paf1 complex (GO:0016593)	1
GO_Cellular_Component_2018	specific granule lumen (GO:0035580)	1
GO_Cellular_Component_2018	mitochondrial outer membrane translocase complex (GO:0005742)	1
GO_Cellular_Component_2018	calcium channel complex (GO:0034704)	1
GO_Cellular_Component_2018	DNA-directed RNA polymerase III complex (GO:0005666)	1
GO_Cellular_Component_2018	endosomal part (GO:0044440)	1
GO_Cellular_Component_2018	endoplasmic reticulum exit site (GO:0070971)	1
GO_Cellular_Component_2018	phagocytic vesicle membrane (GO:0030670)	1
GO_Cellular_Component_2018	alpha DNA polymerase:primase complex (GO:0005658)	1
GO_Cellular_Component_2018	vacuolar proton-transporting V-type ATPase complex (GO:0016471)	1
GO_Cellular_Component_2018	extrinsic component of endosome membrane (GO:0031313)	1
GO_Cellular_Component_2018	phagocytic vesicle (GO:0045335)	1
GO_Cellular_Component_2018	lysosome (GO:0005764)	1
GO_Cellular_Component_2018	junctional sarcoplasmic reticulum membrane (GO:0014701)	1
GO_Cellular_Component_2018	SCF ubiquitin ligase complex (GO:0019005)	1
GO_Cellular_Component_2018	signal recognition particle, endoplasmic reticulum targeting (GO:0005786)	1
GO_Cellular_Component_2018	nuclear ubiquitin ligase complex (GO:0000152)	1
GO_Cellular_Component_2018	spindle microtubule (GO:0005876)	1
GO_Cellular_Component_2018	microtubule (GO:0005874)	1
GO_Cellular_Component_2018	lateral element (GO:0000800)	1
GO_Cellular_Component_2018	brush border membrane (GO:0031526)	1
GO_Cellular_Component_2018	nuclear chromosome (GO:0000228)	1
GO_Cellular_Component_2018	bicellular tight junction (GO:0005923)	1
GO_Cellular_Component_2018	transcription factor TFTC complex (GO:0033276)	1
GO_Cellular_Component_2018	coated vesicle (GO:0030135)	1
GO_Cellular_Component_2018	cytoplasmic vesicle membrane (GO:0030659)	1
GO_Cellular_Component_2018	nucleolus (GO:0005730)	1
GO_Cellular_Component_2018	microvillus membrane (GO:0031528)	1
GO_Cellular_Component_2018	lytic vacuole membrane (GO:0098852)	1
GO_Cellular_Component_2018	axon (GO:0030424)	1
GO_Cellular_Component_2018	proton-transporting V-type ATPase complex (GO:0033176)	1
GO_Cellular_Component_2018	vacuole (GO:0005773)	1
GO_Cellular_Component_2018	microvillus (GO:0005902)	1
GO_Cellular_Component_2018	MICOS complex (GO:0061617)	1
GO_Cellular_Component_2018	AP-3 adaptor complex (GO:0030123)	1
GO_Cellular_Component_2018	cell cortex part (GO:0044448)	1
GO_Cellular_Component_2018	myosin filament (GO:0032982)	1
GO_Cellular_Component_2018	PML body (GO:0016605)	1
GO_Cellular_Component_2018	juxtaparanode region of axon (GO:0044224)	1
GO_Cellular_Component_2018	endoplasmic reticulum lumen (GO:0005788)	1
GO_Cellular_Component_2018	core mediator complex (GO:0070847)	1
GO_Cellular_Component_2018	nuclear origin of replication recognition complex (GO:0005664)	1
GO_Cellular_Component_2018	multivesicular body lumen (GO:0097486)	1
GO_Cellular_Component_2018	pi-body (GO:0071546)	1
GO_Cellular_Component_2018	mitochondrial large ribosomal subunit (GO:0005762)	1
GO_Biological_Process_2018	positive regulation of transforming growth factor beta production (GO:0071636)	14
GO_Biological_Process_2018	regulation of transforming growth factor beta production (GO:0071634)	13
GO_Biological_Process_2018	cellular response to copper ion (GO:0071280)	12
GO_Biological_Process_2018	cellular response to zinc ion (GO:0071294)	12
GO_Biological_Process_2018	response to copper ion (GO:0046688)	12
GO_Biological_Process_2018	response to zinc ion (GO:0010043)	12
GO_Biological_Process_2018	cellular response to cadmium ion (GO:0071276)	12
GO_Biological_Process_2018	zinc ion homeostasis (GO:0055069)	12
GO_Biological_Process_2018	cellular zinc ion homeostasis (GO:0006882)	12
GO_Biological_Process_2018	response to cadmium ion (GO:0046686)	12
GO_Biological_Process_2018	negative regulation of complement activation (GO:0045916)	12
GO_Biological_Process_2018	sensory perception of smell (GO:0007608)	11
GO_Biological_Process_2018	regulation of response to external stimulus (GO:0032101)	11
GO_Biological_Process_2018	cellular divalent inorganic cation homeostasis (GO:0072503)	10
GO_Biological_Process_2018	sensory perception of chemical stimulus (GO:0007606)	10
GO_Biological_Process_2018	regulation of inflammatory response (GO:0050727)	10
GO_Biological_Process_2018	extracellular matrix disassembly (GO:0022617)	10
GO_Biological_Process_2018	cellular transition metal ion homeostasis (GO:0046916)	9
GO_Biological_Process_2018	positive regulation of ATPase activity (GO:0032781)	9
GO_Biological_Process_2018	skeletal muscle contraction (GO:0003009)	9
GO_Biological_Process_2018	cellular response to metal ion (GO:0071248)	9
GO_Biological_Process_2018	keratinocyte differentiation (GO:0030216)	9
GO_Biological_Process_2018	peptide cross-linking (GO:0018149)	9
GO_Biological_Process_2018	epidermal cell differentiation (GO:0009913)	9
GO_Biological_Process_2018	skin development (GO:0043588)	9
GO_Biological_Process_2018	regulation of defense response (GO:0031347)	8
GO_Biological_Process_2018	positive regulation of cytolysis (GO:0045919)	8
GO_Biological_Process_2018	positive regulation of immune system process (GO:0002684)	8
GO_Biological_Process_2018	cellular metal ion homeostasis (GO:0006875)	8
GO_Biological_Process_2018	cholesterol metabolic process (GO:0008203)	8
GO_Biological_Process_2018	positive regulation of immune response (GO:0050778)	8
GO_Biological_Process_2018	neutrophil migration (GO:1990266)	8
GO_Biological_Process_2018	response to interleukin-1 (GO:0070555)	8
GO_Biological_Process_2018	positive regulation of potassium ion transmembrane transport (GO:1901381)	8
GO_Biological_Process_2018	negative regulation of B cell proliferation (GO:0030889)	8
GO_Biological_Process_2018	positive regulation of type 2 immune response (GO:0002830)	8
GO_Biological_Process_2018	epidermis development (GO:0008544)	8
GO_Biological_Process_2018	lipoxygenase pathway (GO:0019372)	8
GO_Biological_Process_2018	regulation of water loss via skin (GO:0033561)	8
GO_Biological_Process_2018	establishment of skin barrier (GO:0061436)	8
GO_Biological_Process_2018	regulation of interleukin-18 production (GO:0032661)	7
GO_Biological_Process_2018	positive regulation of CD4-positive, alpha-beta T cell activation (GO:2000516)	7
GO_Biological_Process_2018	negative regulation of peptidase activity (GO:0010466)	7
GO_Biological_Process_2018	amyloid precursor protein metabolic process (GO:0042982)	7
GO_Biological_Process_2018	regulation of endopeptidase activity (GO:0052548)	7
GO_Biological_Process_2018	negative regulation of endopeptidase activity (GO:0010951)	7
GO_Biological_Process_2018	negative regulation of cytokine production involved in immune response (GO:0002719)	7
GO_Biological_Process_2018	hematopoietic progenitor cell differentiation (GO:0002244)	7
GO_Biological_Process_2018	inactivation of MAPK activity (GO:0000188)	7
GO_Biological_Process_2018	neutrophil chemotaxis (GO:0030593)	7
GO_Biological_Process_2018	granulocyte chemotaxis (GO:0071621)	7
GO_Biological_Process_2018	response to tumor necrosis factor (GO:0034612)	7
GO_Biological_Process_2018	positive regulation of hydrolase activity (GO:0051345)	7
GO_Biological_Process_2018	synaptic vesicle recycling (GO:0036465)	7
GO_Biological_Process_2018	unsaturated fatty acid biosynthetic process (GO:0006636)	7
GO_Biological_Process_2018	icosanoid metabolic process (GO:0006690)	7
GO_Biological_Process_2018	negative regulation of immune response (GO:0050777)	6
GO_Biological_Process_2018	inflammatory response (GO:0006954)	6
GO_Biological_Process_2018	regulation of regulatory T cell differentiation (GO:0045589)	6
GO_Biological_Process_2018	divalent metal ion transport (GO:0070838)	6
GO_Biological_Process_2018	lens fiber cell development (GO:0070307)	6
GO_Biological_Process_2018	positive regulation of potassium ion transmembrane transporter activity (GO:1901018)	6
GO_Biological_Process_2018	gas homeostasis (GO:0033483)	6
GO_Biological_Process_2018	regulation of AMPA receptor activity (GO:2000311)	6
GO_Biological_Process_2018	sarcomere organization (GO:0045214)	6
GO_Biological_Process_2018	water transport (GO:0006833)	6
GO_Biological_Process_2018	negative regulation of hydrolase activity (GO:0051346)	6
GO_Biological_Process_2018	monocyte chemotaxis (GO:0002548)	6
GO_Biological_Process_2018	positive regulation of ERK1 and ERK2 cascade (GO:0070374)	6
GO_Biological_Process_2018	protein homotrimerization (GO:0070207)	6
GO_Biological_Process_2018	regulation of leukocyte migration (GO:0002685)	6
GO_Biological_Process_2018	striated muscle contraction (GO:0006941)	6
GO_Biological_Process_2018	cholesterol biosynthetic process (GO:0006695)	6
GO_Biological_Process_2018	secondary alcohol biosynthetic process (GO:1902653)	6
GO_Biological_Process_2018	positive regulation of MAPK cascade (GO:0043410)	6
GO_Biological_Process_2018	protein transmembrane import into intracellular organelle (GO:0044743)	6
GO_Biological_Process_2018	cellular protein modification process (GO:0006464)	6
GO_Biological_Process_2018	outer mitochondrial membrane organization (GO:0007008)	6
GO_Biological_Process_2018	regulation of organelle organization (GO:0033043)	6
GO_Biological_Process_2018	regulation of nucleic acid-templated transcription (GO:1903506)	5
GO_Biological_Process_2018	regulation of cellular macromolecule biosynthetic process (GO:2000112)	5
GO_Biological_Process_2018	regulation of gene expression (GO:0010468)	5
GO_Biological_Process_2018	regulation of endothelial cell proliferation (GO:0001936)	5
GO_Biological_Process_2018	protein complex assembly (GO:0006461)	5
GO_Biological_Process_2018	COPII vesicle coating (GO:0048208)	5
GO_Biological_Process_2018	vesicle targeting, rough ER to cis-Golgi (GO:0048207)	5
GO_Biological_Process_2018	vesicle coating (GO:0006901)	5
GO_Biological_Process_2018	negative regulation of immune system process (GO:0002683)	5
GO_Biological_Process_2018	regulation of cardiac conduction (GO:1903779)	5
GO_Biological_Process_2018	negative regulation of inflammatory response (GO:0050728)	5
GO_Biological_Process_2018	response to prostaglandin E (GO:0034695)	5
GO_Biological_Process_2018	positive regulation of regulatory T cell differentiation (GO:0045591)	5
GO_Biological_Process_2018	calcium ion transport (GO:0006816)	5
GO_Biological_Process_2018	myelination (GO:0042552)	5
GO_Biological_Process_2018	response to metal ion (GO:0010038)	5
GO_Biological_Process_2018	regulation of mRNA 3'-end processing (GO:0031440)	5
GO_Biological_Process_2018	negative regulation of NF-kappaB transcription factor activity (GO:0032088)	5
GO_Biological_Process_2018	regulation of immunoglobulin mediated immune response (GO:0002889)	5
GO_Biological_Process_2018	peptidyl-proline hydroxylation (GO:0019511)	5
GO_Biological_Process_2018	cellular response to retinoic acid (GO:0071300)	5
GO_Biological_Process_2018	regulation of nitric-oxide synthase activity (GO:0050999)	5
GO_Biological_Process_2018	positive regulation of isomerase activity (GO:0010912)	5
GO_Biological_Process_2018	negative regulation of growth (GO:0045926)	5
GO_Biological_Process_2018	positive regulation of ERAD pathway (GO:1904294)	5
GO_Biological_Process_2018	negative regulation of sequence-specific DNA binding transcription factor activity (GO:0043433)	5
GO_Biological_Process_2018	regulation of ATPase activity (GO:0043462)	5
GO_Biological_Process_2018	vesicle organization (GO:0016050)	5
GO_Biological_Process_2018	eosinophil chemotaxis (GO:0048245)	5
GO_Biological_Process_2018	eosinophil migration (GO:0072677)	5
GO_Biological_Process_2018	lymphocyte chemotaxis (GO:0048247)	5
GO_Biological_Process_2018	response to interferon-gamma (GO:0034341)	5
GO_Biological_Process_2018	positive regulation of GTPase activity (GO:0043547)	5
GO_Biological_Process_2018	regulation of GTPase activity (GO:0043087)	5
GO_Biological_Process_2018	cellular response to interferon-gamma (GO:0071346)	5
GO_Biological_Process_2018	myeloid leukocyte differentiation (GO:0002573)	5
GO_Biological_Process_2018	positive regulation of interleukin-1 beta production (GO:0032731)	5
GO_Biological_Process_2018	regulation of ERK1 and ERK2 cascade (GO:0070372)	5
GO_Biological_Process_2018	positive regulation of defense response (GO:0031349)	5
GO_Biological_Process_2018	sterol biosynthetic process (GO:0016126)	5
GO_Biological_Process_2018	peptidyl-lysine dimethylation (GO:0018027)	5
GO_Biological_Process_2018	negative regulation of acute inflammatory response (GO:0002674)	5
GO_Biological_Process_2018	positive regulation of humoral immune response (GO:0002922)	5
GO_Biological_Process_2018	oxygen homeostasis (GO:0032364)	5
GO_Biological_Process_2018	regulation of B cell proliferation (GO:0030888)	5
GO_Biological_Process_2018	G-protein coupled acetylcholine receptor signaling pathway (GO:0007213)	5
GO_Biological_Process_2018	regulation of immunoglobulin production (GO:0002637)	5
GO_Biological_Process_2018	regulation of chromosome organization (GO:0033044)	5
GO_Biological_Process_2018	calcium ion import into cytosol (GO:1902656)	5
GO_Biological_Process_2018	calcium ion import across plasma membrane (GO:0098703)	5
GO_Biological_Process_2018	long-chain fatty acid biosynthetic process (GO:0042759)	5
GO_Biological_Process_2018	regulation of glutamate receptor signaling pathway (GO:1900449)	5
GO_Biological_Process_2018	muscle contraction (GO:0006936)	5
GO_Biological_Process_2018	ephrin receptor signaling pathway (GO:0048013)	5
GO_Biological_Process_2018	unsaturated fatty acid metabolic process (GO:0033559)	5
GO_Biological_Process_2018	vesicle fusion (GO:0006906)	5
GO_Biological_Process_2018	protein transport (GO:0015031)	5
GO_Biological_Process_2018	regulation of transcription, DNA-templated (GO:0006355)	4
GO_Biological_Process_2018	COPII-coated vesicle budding (GO:0090114)	4
GO_Biological_Process_2018	regulation of cholesterol transport (GO:0032374)	4
GO_Biological_Process_2018	cellular response to prostaglandin E stimulus (GO:0071380)	4
GO_Biological_Process_2018	regulation of neuron apoptotic process (GO:0043523)	4
GO_Biological_Process_2018	cellular response to prostaglandin stimulus (GO:0071379)	4
GO_Biological_Process_2018	negative regulation of defense response (GO:0031348)	4
GO_Biological_Process_2018	regulation of heart contraction (GO:0008016)	4
GO_Biological_Process_2018	regulation of G-protein coupled receptor protein signaling pathway (GO:0008277)	4
GO_Biological_Process_2018	immune response-inhibiting cell surface receptor signaling pathway (GO:0002767)	4
GO_Biological_Process_2018	midbrain dopaminergic neuron differentiation (GO:1904948)	4
GO_Biological_Process_2018	negative regulation of response to external stimulus (GO:0032102)	4
GO_Biological_Process_2018	striated muscle tissue development (GO:0014706)	4
GO_Biological_Process_2018	actomyosin structure organization (GO:0031032)	4
GO_Biological_Process_2018	release of sequestered calcium ion into cytosol by endoplasmic reticulum (GO:1903514)	4
GO_Biological_Process_2018	negative regulation of T cell mediated immunity (GO:0002710)	4
GO_Biological_Process_2018	cofactor biosynthetic process (GO:0051188)	4
GO_Biological_Process_2018	regulation of spindle assembly (GO:0090169)	4
GO_Biological_Process_2018	positive regulation of interleukin-1 beta secretion (GO:0050718)	4
GO_Biological_Process_2018	negative regulation of calcium ion transport (GO:0051926)	4
GO_Biological_Process_2018	regulation of dopamine receptor signaling pathway (GO:0060159)	4
GO_Biological_Process_2018	peptidyl-lysine monomethylation (GO:0018026)	4
GO_Biological_Process_2018	regulation of blood vessel diameter (GO:0097746)	4
GO_Biological_Process_2018	organelle membrane fusion (GO:0090174)	4
GO_Biological_Process_2018	chemokine-mediated signaling pathway (GO:0070098)	4
GO_Biological_Process_2018	regulation of natural killer cell chemotaxis (GO:2000501)	4
GO_Biological_Process_2018	calcium ion homeostasis (GO:0055074)	4
GO_Biological_Process_2018	cellular response to tumor necrosis factor (GO:0071356)	4
GO_Biological_Process_2018	cellular response to cytokine stimulus (GO:0071345)	4
GO_Biological_Process_2018	cellular response to interleukin-1 (GO:0071347)	4
GO_Biological_Process_2018	response to nitric oxide (GO:0071731)	4
GO_Biological_Process_2018	negative regulation of secretion by cell (GO:1903531)	4
GO_Biological_Process_2018	histone lysine methylation (GO:0034968)	4
GO_Biological_Process_2018	ATP synthesis coupled electron transport (GO:0042773)	4
GO_Biological_Process_2018	positive regulation of inflammatory response (GO:0050729)	4
GO_Biological_Process_2018	fluid transport (GO:0042044)	4
GO_Biological_Process_2018	creatine metabolic process (GO:0006600)	4
GO_Biological_Process_2018	protein prenylation (GO:0018342)	4
GO_Biological_Process_2018	galactosylceramide metabolic process (GO:0006681)	4
GO_Biological_Process_2018	T-helper 17 cell lineage commitment (GO:0072540)	4
GO_Biological_Process_2018	cardiac muscle contraction (GO:0060048)	4
GO_Biological_Process_2018	protein localization to membrane (GO:0072657)	4
GO_Biological_Process_2018	relaxation of cardiac muscle (GO:0055119)	4
GO_Biological_Process_2018	stress granule assembly (GO:0034063)	4
GO_Biological_Process_2018	negative regulation of cardiac muscle hypertrophy (GO:0010614)	4
GO_Biological_Process_2018	myeloid cell activation involved in immune response (GO:0002275)	4
GO_Biological_Process_2018	detection of chemical stimulus involved in sensory perception (GO:0050907)	4
GO_Biological_Process_2018	chemical homeostasis (GO:0048878)	4
GO_Biological_Process_2018	snRNA processing (GO:0016180)	4
GO_Biological_Process_2018	response to interferon-alpha (GO:0035455)	4
GO_Biological_Process_2018	protein import into mitochondrial matrix (GO:0030150)	4
GO_Biological_Process_2018	T-helper cell lineage commitment (GO:0002295)	4
GO_Biological_Process_2018	amyloid precursor protein catabolic process (GO:0042987)	4
GO_Biological_Process_2018	regulation of cell cycle G1/S phase transition (GO:1902806)	4
GO_Biological_Process_2018	regulation of neurotransmitter receptor activity (GO:0099601)	4
GO_Biological_Process_2018	regulation of protein tyrosine kinase activity (GO:0061097)	4
GO_Biological_Process_2018	regulation of intracellular protein transport (GO:0033157)	4
GO_Biological_Process_2018	sulfur compound transport (GO:0072348)	4
GO_Biological_Process_2018	protein localization to nucleus (GO:0034504)	4
GO_Biological_Process_2018	potassium ion import across plasma membrane (GO:1990573)	4
GO_Biological_Process_2018	regulation of alcohol biosynthetic process (GO:1902930)	4
GO_Biological_Process_2018	fatty acid metabolic process (GO:0006631)	4
GO_Biological_Process_2018	RNA export from nucleus (GO:0006405)	4
GO_Biological_Process_2018	acetyl-CoA metabolic process (GO:0006084)	4
GO_Biological_Process_2018	cellular nitrogen compound catabolic process (GO:0044270)	4
GO_Biological_Process_2018	regulation of vesicle-mediated transport (GO:0060627)	4
GO_Biological_Process_2018	mRNA-containing ribonucleoprotein complex export from nucleus (GO:0071427)	4
GO_Biological_Process_2018	mRNA transport (GO:0051028)	4
GO_Biological_Process_2018	intracellular protein transport (GO:0006886)	4
GO_Biological_Process_2018	cellular protein localization (GO:0034613)	4
GO_Biological_Process_2018	positive regulation of response to external stimulus (GO:0032103)	4
GO_Biological_Process_2018	positive regulation of histone acetylation (GO:0035066)	4
GO_Biological_Process_2018	cell morphogenesis involved in differentiation (GO:0000904)	4
GO_Biological_Process_2018	cellular hyperosmotic response (GO:0071474)	4
GO_Biological_Process_2018	regulation of fibroblast proliferation (GO:0048145)	4
GO_Biological_Process_2018	negative regulation of phosphatase activity (GO:0010923)	3
GO_Biological_Process_2018	positive regulation of endothelial cell proliferation (GO:0001938)	3
GO_Biological_Process_2018	skeletal muscle organ development (GO:0060538)	3
GO_Biological_Process_2018	negative regulation of macrophage derived foam cell differentiation (GO:0010745)	3
GO_Biological_Process_2018	negative regulation of neuron death (GO:1901215)	3
GO_Biological_Process_2018	metallo-sulfur cluster assembly (GO:0031163)	3
GO_Biological_Process_2018	cellular response to transforming growth factor beta stimulus (GO:0071560)	3
GO_Biological_Process_2018	regulation of phosphatase activity (GO:0010921)	3
GO_Biological_Process_2018	skeletal muscle tissue development (GO:0007519)	3
GO_Biological_Process_2018	mRNA transcription (GO:0009299)	3
GO_Biological_Process_2018	negative regulation of protein tyrosine kinase activity (GO:0061099)	3
GO_Biological_Process_2018	stabilization of membrane potential (GO:0030322)	3
GO_Biological_Process_2018	positive regulation of fatty acid biosynthetic process (GO:0045723)	3
GO_Biological_Process_2018	regulation of cholesterol esterification (GO:0010872)	3
GO_Biological_Process_2018	regulation of striated muscle contraction (GO:0006942)	3
GO_Biological_Process_2018	regulation of vasoconstriction (GO:0019229)	3
GO_Biological_Process_2018	positive regulation of calcium ion transmembrane transporter activity (GO:1901021)	3
GO_Biological_Process_2018	vitamin transport (GO:0051180)	3
GO_Biological_Process_2018	cholesterol efflux (GO:0033344)	3
GO_Biological_Process_2018	negative regulation of cell differentiation (GO:0045596)	3
GO_Biological_Process_2018	negative regulation of nitric oxide metabolic process (GO:1904406)	3
GO_Biological_Process_2018	negative regulation of nitric oxide biosynthetic process (GO:0045019)	3
GO_Biological_Process_2018	regulation of protein binding (GO:0043393)	3
GO_Biological_Process_2018	regulation of immune response (GO:0050776)	3
GO_Biological_Process_2018	regulation of regulated secretory pathway (GO:1903305)	3
GO_Biological_Process_2018	iron-sulfur cluster assembly (GO:0016226)	3
GO_Biological_Process_2018	DNA-templated transcription, initiation (GO:0006352)	3
GO_Biological_Process_2018	regulation of macromolecule metabolic process (GO:0060255)	3
GO_Biological_Process_2018	myelination in peripheral nervous system (GO:0022011)	3
GO_Biological_Process_2018	negative regulation of reactive oxygen species biosynthetic process (GO:1903427)	3
GO_Biological_Process_2018	protein localization to endoplasmic reticulum (GO:0070972)	3
GO_Biological_Process_2018	RNA interference (GO:0016246)	3
GO_Biological_Process_2018	regulation of cytolysis (GO:0042268)	3
GO_Biological_Process_2018	neurotransmitter receptor diffusion trapping (GO:0099628)	3
GO_Biological_Process_2018	postsynaptic neurotransmitter receptor diffusion trapping (GO:0098970)	3
GO_Biological_Process_2018	exocyst localization (GO:0051601)	3
GO_Biological_Process_2018	4-hydroxyproline metabolic process (GO:0019471)	3
GO_Biological_Process_2018	negative regulation of leukocyte mediated cytotoxicity (GO:0001911)	3
GO_Biological_Process_2018	inorganic cation transmembrane transport (GO:0098662)	3
GO_Biological_Process_2018	cytoskeleton-dependent intracellular transport (GO:0030705)	3
GO_Biological_Process_2018	axon development (GO:0061564)	3
GO_Biological_Process_2018	negative regulation of transcription, DNA-templated (GO:0045892)	3
GO_Biological_Process_2018	positive regulation of mitochondrial membrane potential (GO:0010918)	3
GO_Biological_Process_2018	release of sequestered calcium ion into cytosol (GO:0051209)	3
GO_Biological_Process_2018	negative regulation of dendritic cell apoptotic process (GO:2000669)	3
GO_Biological_Process_2018	negative regulation of sequestering of calcium ion (GO:0051283)	3
GO_Biological_Process_2018	nicotinamide nucleotide metabolic process (GO:0046496)	3
GO_Biological_Process_2018	zinc II ion transport (GO:0006829)	3
GO_Biological_Process_2018	sensory perception of light stimulus (GO:0050953)	3
GO_Biological_Process_2018	protein trimerization (GO:0070206)	3
GO_Biological_Process_2018	visual perception (GO:0007601)	3
GO_Biological_Process_2018	negative regulation of response to stimulus (GO:0048585)	3
GO_Biological_Process_2018	platelet degranulation (GO:0002576)	3
GO_Biological_Process_2018	regulation of sequestering of zinc ion (GO:0061088)	3
GO_Biological_Process_2018	embryonic skeletal joint development (GO:0072498)	3
GO_Biological_Process_2018	positive regulation of T-helper 2 cell differentiation (GO:0045630)	3
GO_Biological_Process_2018	endosome to lysosome transport via multivesicular body sorting pathway (GO:0032510)	3
GO_Biological_Process_2018	sodium ion transport (GO:0006814)	3
GO_Biological_Process_2018	myofibril assembly (GO:0030239)	3
GO_Biological_Process_2018	negative regulation of innate immune response (GO:0045824)	3
GO_Biological_Process_2018	neuromuscular junction development (GO:0007528)	3
GO_Biological_Process_2018	hemidesmosome assembly (GO:0031581)	3
GO_Biological_Process_2018	positive regulation of T-helper cell differentiation (GO:0045624)	3
GO_Biological_Process_2018	cell-substrate junction assembly (GO:0007044)	3
GO_Biological_Process_2018	dendritic cell differentiation (GO:0097028)	3
GO_Biological_Process_2018	positive regulation of mRNA processing (GO:0050685)	3
GO_Biological_Process_2018	calcium-dependent cell-cell adhesion via plasma membrane cell adhesion molecules (GO:0016339)	3
GO_Biological_Process_2018	mononuclear cell differentiation (GO:1903131)	3
GO_Biological_Process_2018	monocyte differentiation (GO:0030224)	3
GO_Biological_Process_2018	negative regulation of epithelial to mesenchymal transition (GO:0010719)	3
GO_Biological_Process_2018	regulation of dephosphorylation (GO:0035303)	3
GO_Biological_Process_2018	organic substance transport (GO:0071702)	3
GO_Biological_Process_2018	bicarbonate transport (GO:0015701)	3
GO_Biological_Process_2018	myeloid dendritic cell activation (GO:0001773)	3
GO_Biological_Process_2018	positive regulation of peptidyl-tyrosine phosphorylation (GO:0050731)	3
GO_Biological_Process_2018	modulation by host of viral process (GO:0044788)	3
GO_Biological_Process_2018	acyl-CoA metabolic process (GO:0006637)	3
GO_Biological_Process_2018	vesicle-mediated transport in synapse (GO:0099003)	3
GO_Biological_Process_2018	cellular response to light stimulus (GO:0071482)	3
GO_Biological_Process_2018	regulation of protein exit from endoplasmic reticulum (GO:0070861)	3
GO_Biological_Process_2018	positive regulation of protein exit from endoplasmic reticulum (GO:0070863)	3
GO_Biological_Process_2018	regulated exocytosis (GO:0045055)	3
GO_Biological_Process_2018	DNA catabolic process (GO:0006308)	3
GO_Biological_Process_2018	leukocyte adhesion to vascular endothelial cell (GO:0061756)	3
GO_Biological_Process_2018	negative regulation of NF-kappaB import into nucleus (GO:0042347)	3
GO_Biological_Process_2018	leukocyte tethering or rolling (GO:0050901)	3
GO_Biological_Process_2018	negative regulation of transcription elongation from RNA polymerase II promoter (GO:0034244)	3
GO_Biological_Process_2018	nucleoside salvage (GO:0043174)	3
GO_Biological_Process_2018	snRNA 3'-end processing (GO:0034472)	3
GO_Biological_Process_2018	neutrophil activation involved in immune response (GO:0002283)	3
GO_Biological_Process_2018	nose development (GO:0043584)	3
GO_Biological_Process_2018	regulation of T-helper 2 cell cytokine production (GO:2000551)	3
GO_Biological_Process_2018	regulation of interleukin-4 production (GO:0032673)	3
GO_Biological_Process_2018	negative regulation of viral entry into host cell (GO:0046597)	3
GO_Biological_Process_2018	muscle filament sliding (GO:0030049)	3
GO_Biological_Process_2018	actin-myosin filament sliding (GO:0033275)	3
GO_Biological_Process_2018	ERAD pathway (GO:0036503)	3
GO_Biological_Process_2018	sodium ion export from cell (GO:0036376)	3
GO_Biological_Process_2018	sodium ion export (GO:0071436)	3
GO_Biological_Process_2018	regulation of nucleocytoplasmic transport (GO:0046822)	3
GO_Biological_Process_2018	negative regulation of leukocyte degranulation (GO:0043301)	3
GO_Biological_Process_2018	pyrimidine-containing compound metabolic process (GO:0072527)	3
GO_Biological_Process_2018	regulation of muscle contraction (GO:0006937)	3
GO_Biological_Process_2018	regulation of nitric oxide biosynthetic process (GO:0045428)	3
GO_Biological_Process_2018	heart contraction (GO:0060047)	3
GO_Biological_Process_2018	negative regulation of immune effector process (GO:0002698)	3
GO_Biological_Process_2018	positive regulation of nitric-oxide synthase activity (GO:0051000)	3
GO_Biological_Process_2018	regulation of cation channel activity (GO:2001257)	3
GO_Biological_Process_2018	positive regulation of fibroblast proliferation (GO:0048146)	3
GO_Biological_Process_2018	heterocycle biosynthetic process (GO:0018130)	3
GO_Biological_Process_2018	Golgi vesicle transport (GO:0048193)	3
GO_Biological_Process_2018	response to endoplasmic reticulum stress (GO:0034976)	3
GO_Biological_Process_2018	endodermal cell differentiation (GO:0035987)	3
GO_Biological_Process_2018	tumor necrosis factor-mediated signaling pathway (GO:0033209)	3
GO_Biological_Process_2018	response to UV (GO:0009411)	3
GO_Biological_Process_2018	neuronal ion channel clustering (GO:0045161)	3
GO_Biological_Process_2018	cellular protein complex assembly (GO:0043623)	3
GO_Biological_Process_2018	neuron projection regeneration (GO:0031102)	3
GO_Biological_Process_2018	potassium ion import (GO:0010107)	3
GO_Biological_Process_2018	lipoprotein metabolic process (GO:0042157)	3
GO_Biological_Process_2018	positive regulation of cholesterol esterification (GO:0010873)	3
GO_Biological_Process_2018	regulation of cholesterol metabolic process (GO:0090181)	3
GO_Biological_Process_2018	signal transduction by p53 class mediator (GO:0072331)	3
GO_Biological_Process_2018	cell-cell junction maintenance (GO:0045217)	3
GO_Biological_Process_2018	potassium ion homeostasis (GO:0055075)	3
GO_Biological_Process_2018	import across plasma membrane (GO:0098739)	3
GO_Biological_Process_2018	nuclear import (GO:0051170)	3
GO_Biological_Process_2018	regulation of brown fat cell differentiation (GO:0090335)	3
GO_Biological_Process_2018	carbohydrate homeostasis (GO:0033500)	3
GO_Biological_Process_2018	response to nutrient levels (GO:0031667)	3
GO_Biological_Process_2018	phosphatidylcholine acyl-chain remodeling (GO:0036151)	3
GO_Biological_Process_2018	regulation of adaptive immune response (GO:0002819)	3
GO_Biological_Process_2018	positive regulation of gene expression (GO:0010628)	3
GO_Biological_Process_2018	regulation of cellular response to heat (GO:1900034)	3
GO_Biological_Process_2018	cell-cell junction assembly (GO:0007043)	3
GO_Biological_Process_2018	positive regulation of fertilization (GO:1905516)	3
GO_Biological_Process_2018	regulation of secretion by cell (GO:1903530)	3
GO_Biological_Process_2018	poly(A)+ mRNA export from nucleus (GO:0016973)	3
GO_Biological_Process_2018	mRNA export from nucleus (GO:0006406)	3
GO_Biological_Process_2018	tooth mineralization (GO:0034505)	3
GO_Biological_Process_2018	cytochrome complex assembly (GO:0017004)	3
GO_Biological_Process_2018	energy coupled proton transport, down electrochemical gradient (GO:0015985)	3
GO_Biological_Process_2018	lipoprotein biosynthetic process (GO:0042158)	3
GO_Biological_Process_2018	regulation of JAK-STAT cascade (GO:0046425)	3
GO_Biological_Process_2018	IRES-dependent viral translational initiation (GO:0075522)	3
GO_Biological_Process_2018	growth hormone receptor signaling pathway (GO:0060396)	3
GO_Biological_Process_2018	positive regulation of histone H4 acetylation (GO:0090240)	3
GO_Biological_Process_2018	regulation of single stranded viral RNA replication via double stranded DNA intermediate (GO:0045091)	3
GO_Biological_Process_2018	negative regulation of single stranded viral RNA replication via double stranded DNA intermediate (GO:0045869)	3
GO_Biological_Process_2018	DNA cytosine deamination (GO:0070383)	3
GO_Biological_Process_2018	negative regulation of leukocyte activation (GO:0002695)	3
GO_Biological_Process_2018	cytidine to uridine editing (GO:0016554)	3
GO_Biological_Process_2018	copper ion import (GO:0015677)	3
GO_Biological_Process_2018	positive regulation of calcium ion transport (GO:0051928)	3
GO_Biological_Process_2018	positive regulation of cardiocyte differentiation (GO:1905209)	3
GO_Biological_Process_2018	DNA deamination (GO:0045006)	3
GO_Biological_Process_2018	spindle assembly checkpoint (GO:0071173)	3
GO_Biological_Process_2018	mitotic spindle assembly checkpoint (GO:0007094)	3
GO_Biological_Process_2018	mitotic spindle checkpoint (GO:0071174)	3
GO_Biological_Process_2018	base conversion or substitution editing (GO:0016553)	3
GO_Biological_Process_2018	substrate adhesion-dependent cell spreading (GO:0034446)	3
GO_Biological_Process_2018	purine ribonucleotide metabolic process (GO:0009150)	3
GO_Biological_Process_2018	hexose biosynthetic process (GO:0019319)	3
GO_Biological_Process_2018	gluconeogenesis (GO:0006094)	3
GO_Biological_Process_2018	regulation of telomere maintenance via telomere lengthening (GO:1904356)	3
GO_Biological_Process_2018	complement receptor mediated signaling pathway (GO:0002430)	2
GO_Biological_Process_2018	lipid catabolic process (GO:0016042)	2
GO_Biological_Process_2018	regulation of phosphoprotein phosphatase activity (GO:0043666)	2
GO_Biological_Process_2018	amide transport (GO:0042886)	2
GO_Biological_Process_2018	immune response-activating cell surface receptor signaling pathway (GO:0002429)	2
GO_Biological_Process_2018	folic acid transport (GO:0015884)	2
GO_Biological_Process_2018	mRNA transcription from RNA polymerase II promoter (GO:0042789)	2
GO_Biological_Process_2018	cholesterol homeostasis (GO:0042632)	2
GO_Biological_Process_2018	sterol homeostasis (GO:0055092)	2
GO_Biological_Process_2018	positive regulation of epidermal cell differentiation (GO:0045606)	2
GO_Biological_Process_2018	positive regulation of G-protein coupled receptor protein signaling pathway (GO:0045745)	2
GO_Biological_Process_2018	positive regulation of cytosolic calcium ion concentration (GO:0007204)	2
GO_Biological_Process_2018	positive regulation of epidermis development (GO:0045684)	2
GO_Biological_Process_2018	negative regulation of neuron apoptotic process (GO:0043524)	2
GO_Biological_Process_2018	regulation of cytosolic calcium ion concentration (GO:0051480)	2
GO_Biological_Process_2018	negative regulation of hydrogen peroxide-induced cell death (GO:1903206)	2
GO_Biological_Process_2018	transforming growth factor beta receptor signaling pathway (GO:0007179)	2
GO_Biological_Process_2018	positive regulation of epithelial cell proliferation (GO:0050679)	2
GO_Biological_Process_2018	negative regulation of tumor necrosis factor production (GO:0032720)	2
GO_Biological_Process_2018	regulation of macrophage derived foam cell differentiation (GO:0010743)	2
GO_Biological_Process_2018	positive regulation of blood circulation (GO:1903524)	2
GO_Biological_Process_2018	regulation of blood vessel endothelial cell migration (GO:0043535)	2
GO_Biological_Process_2018	phospholipid efflux (GO:0033700)	2
GO_Biological_Process_2018	positive regulation of keratinocyte differentiation (GO:0045618)	2
GO_Biological_Process_2018	regulation of cyclic-nucleotide phosphodiesterase activity (GO:0051342)	2
GO_Biological_Process_2018	lymphatic endothelial cell differentiation (GO:0060836)	2
GO_Biological_Process_2018	regulation of dendritic cell differentiation (GO:2001198)	2
GO_Biological_Process_2018	regulation of cell cycle process (GO:0010564)	2
GO_Biological_Process_2018	positive regulation of alpha-beta T cell proliferation (GO:0046641)	2
GO_Biological_Process_2018	hemopoiesis (GO:0030097)	2
GO_Biological_Process_2018	negative regulation of MAP kinase activity (GO:0043407)	2
GO_Biological_Process_2018	negative regulation of interleukin-1 production (GO:0032692)	2
GO_Biological_Process_2018	positive regulation of cAMP metabolic process (GO:0030816)	2
GO_Biological_Process_2018	regulation of epidermal cell differentiation (GO:0045604)	2
GO_Biological_Process_2018	positive regulation of cAMP biosynthetic process (GO:0030819)	2
GO_Biological_Process_2018	modified amino acid transport (GO:0072337)	2
GO_Biological_Process_2018	flavonoid glucuronidation (GO:0052696)	2
GO_Biological_Process_2018	xenobiotic glucuronidation (GO:0052697)	2
GO_Biological_Process_2018	positive regulation of membrane potential (GO:0045838)	2
GO_Biological_Process_2018	cellular calcium ion homeostasis (GO:0006874)	2
GO_Biological_Process_2018	positive regulation of G2/M transition of mitotic cell cycle (GO:0010971)	2
GO_Biological_Process_2018	leptin-mediated signaling pathway (GO:0033210)	2
GO_Biological_Process_2018	regulation of dendritic cell antigen processing and presentation (GO:0002604)	2
GO_Biological_Process_2018	regulation of cardiac muscle hypertrophy (GO:0010611)	2
GO_Biological_Process_2018	negative regulation of cytokine production (GO:0001818)	2
GO_Biological_Process_2018	positive regulation of cell cycle G2/M phase transition (GO:1902751)	2
GO_Biological_Process_2018	protein monoubiquitination (GO:0006513)	2
GO_Biological_Process_2018	regulation of cytokinesis (GO:0032465)	2
GO_Biological_Process_2018	negative regulation of cellular macromolecule biosynthetic process (GO:2000113)	2
GO_Biological_Process_2018	intermediate filament organization (GO:0045109)	2
GO_Biological_Process_2018	macrophage chemotaxis (GO:0048246)	2
GO_Biological_Process_2018	macrophage migration (GO:1905517)	2
GO_Biological_Process_2018	carbohydrate catabolic process (GO:0016052)	2
GO_Biological_Process_2018	citrate metabolic process (GO:0006101)	2
GO_Biological_Process_2018	carbohydrate transport (GO:0008643)	2
GO_Biological_Process_2018	striated muscle hypertrophy (GO:0014897)	2
GO_Biological_Process_2018	regulation of calcium ion transport (GO:0051924)	2
GO_Biological_Process_2018	protein depolymerization (GO:0051261)	2
GO_Biological_Process_2018	microtubule depolymerization (GO:0007019)	2
GO_Biological_Process_2018	calcium ion transmembrane import into cytosol (GO:0097553)	2
GO_Biological_Process_2018	mitochondrion distribution (GO:0048311)	2
GO_Biological_Process_2018	low-density lipoprotein particle remodeling (GO:0034374)	2
GO_Biological_Process_2018	regulation of steroid metabolic process (GO:0019218)	2
GO_Biological_Process_2018	negative regulation of gene expression (GO:0010629)	2
GO_Biological_Process_2018	GPI anchor biosynthetic process (GO:0006506)	2
GO_Biological_Process_2018	nervous system development (GO:0007399)	2
GO_Biological_Process_2018	synapse assembly (GO:0007416)	2
GO_Biological_Process_2018	regulation of cysteine-type endopeptidase activity (GO:2000116)	2
GO_Biological_Process_2018	nitrogen compound transport (GO:0071705)	2
GO_Biological_Process_2018	detection of chemical stimulus involved in sensory perception of bitter taste (GO:0001580)	2
GO_Biological_Process_2018	cell-cell adhesion via plasma-membrane adhesion molecules (GO:0098742)	2
GO_Biological_Process_2018	sensory perception of bitter taste (GO:0050913)	2
GO_Biological_Process_2018	chemical synaptic transmission (GO:0007268)	2
GO_Biological_Process_2018	detection of chemical stimulus involved in sensory perception of taste (GO:0050912)	2
GO_Biological_Process_2018	urate transport (GO:0015747)	2
GO_Biological_Process_2018	carboxylic acid transmembrane transport (GO:1905039)	2
GO_Biological_Process_2018	transcription from RNA polymerase II promoter (GO:0006366)	2
GO_Biological_Process_2018	sodium-independent organic anion transport (GO:0043252)	2
GO_Biological_Process_2018	immunoglobulin mediated immune response (GO:0016064)	2
GO_Biological_Process_2018	positive regulation of viral process (GO:0048524)	2
GO_Biological_Process_2018	regulation of fertilization (GO:0080154)	2
GO_Biological_Process_2018	negative regulation of necroptotic process (GO:0060546)	2
GO_Biological_Process_2018	activation of cysteine-type endopeptidase activity (GO:0097202)	2
GO_Biological_Process_2018	positive regulation of protein depolymerization (GO:1901881)	2
GO_Biological_Process_2018	negative regulation of serine-type endopeptidase activity (GO:1900004)	2
GO_Biological_Process_2018	adipose tissue development (GO:0060612)	2
GO_Biological_Process_2018	toll-like receptor 3 signaling pathway (GO:0034138)	2
GO_Biological_Process_2018	negative regulation of serine-type peptidase activity (GO:1902572)	2
GO_Biological_Process_2018	small RNA loading onto RISC (GO:0070922)	2
GO_Biological_Process_2018	protein targeting to mitochondrion (GO:0006626)	2
GO_Biological_Process_2018	positive regulation of ion transmembrane transporter activity (GO:0032414)	2
GO_Biological_Process_2018	regulation of acrosome reaction (GO:0060046)	2
GO_Biological_Process_2018	negative regulation of multicellular organismal process (GO:0051241)	2
GO_Biological_Process_2018	ion transport (GO:0006811)	2
GO_Biological_Process_2018	regulation of cardiac muscle cell action potential (GO:0098901)	2
GO_Biological_Process_2018	myeloid dendritic cell differentiation (GO:0043011)	2
GO_Biological_Process_2018	cellular response to alcohol (GO:0097306)	2
GO_Biological_Process_2018	regulation of intracellular pH (GO:0051453)	2
GO_Biological_Process_2018	ATP hydrolysis coupled proton transport (GO:0015991)	2
GO_Biological_Process_2018	positive regulation of transmembrane transport (GO:0034764)	2
GO_Biological_Process_2018	carnitine transport (GO:0015879)	2
GO_Biological_Process_2018	amino-acid betaine transport (GO:0015838)	2
GO_Biological_Process_2018	regulation of hormone biosynthetic process (GO:0046885)	2
GO_Biological_Process_2018	ATP hydrolysis coupled cation transmembrane transport (GO:0099132)	2
GO_Biological_Process_2018	leukocyte aggregation (GO:0070486)	2
GO_Biological_Process_2018	defense response to fungus (GO:0050832)	2
GO_Biological_Process_2018	purine-containing compound metabolic process (GO:0072521)	2
GO_Biological_Process_2018	negative regulation of STAT cascade (GO:1904893)	2
GO_Biological_Process_2018	dicarboxylic acid transport (GO:0006835)	2
GO_Biological_Process_2018	extrinsic apoptotic signaling pathway (GO:0097191)	2
GO_Biological_Process_2018	positive regulation of transcription, DNA-templated (GO:0045893)	2
GO_Biological_Process_2018	negative regulation of cysteine-type endopeptidase activity (GO:2000117)	2
GO_Biological_Process_2018	regulation of serine-type endopeptidase activity (GO:1900003)	2
GO_Biological_Process_2018	cell morphogenesis (GO:0000902)	2
GO_Biological_Process_2018	early endosome to late endosome transport (GO:0045022)	2
GO_Biological_Process_2018	regulation of epithelial to mesenchymal transition (GO:0010717)	2
GO_Biological_Process_2018	glycerophospholipid metabolic process (GO:0006650)	2
GO_Biological_Process_2018	transepithelial transport (GO:0070633)	2
GO_Biological_Process_2018	positive regulation of monocyte differentiation (GO:0045657)	2
GO_Biological_Process_2018	negative regulation of vascular permeability (GO:0043116)	2
GO_Biological_Process_2018	fibroblast growth factor receptor signaling pathway (GO:0008543)	2
GO_Biological_Process_2018	anion transport (GO:0006820)	2
GO_Biological_Process_2018	brain development (GO:0007420)	2
GO_Biological_Process_2018	positive regulation of immunoglobulin production (GO:0002639)	2
GO_Biological_Process_2018	positive regulation of protein modification by small protein conjugation or removal (GO:1903322)	2
GO_Biological_Process_2018	positive regulation of potassium ion transport (GO:0043268)	2
GO_Biological_Process_2018	positive regulation of interleukin-10 production (GO:0032733)	2
GO_Biological_Process_2018	synaptic vesicle endocytosis (GO:0048488)	2
GO_Biological_Process_2018	negative regulation of transcription from RNA polymerase II promoter (GO:0000122)	2
GO_Biological_Process_2018	negative regulation of nucleic acid-templated transcription (GO:1903507)	2
GO_Biological_Process_2018	regulation of interleukin-10 production (GO:0032653)	2
GO_Biological_Process_2018	semaphorin-plexin signaling pathway involved in axon guidance (GO:1902287)	2
GO_Biological_Process_2018	protein modification by small protein conjugation or removal (GO:0070647)	2
GO_Biological_Process_2018	positive regulation of cellular protein metabolic process (GO:0032270)	2
GO_Biological_Process_2018	positive regulation of nucleic acid-templated transcription (GO:1903508)	2
GO_Biological_Process_2018	regulation of JNK cascade (GO:0046328)	2
GO_Biological_Process_2018	negative regulation of G1/S transition of mitotic cell cycle (GO:2000134)	2
GO_Biological_Process_2018	calcium ion import (GO:0070509)	2
GO_Biological_Process_2018	positive regulation of ER-associated ubiquitin-dependent protein catabolic process (GO:1903071)	2
GO_Biological_Process_2018	regulation of lymphocyte migration (GO:2000401)	2
GO_Biological_Process_2018	positive regulation of stem cell proliferation (GO:2000648)	2
GO_Biological_Process_2018	regulation of cardiac muscle cell membrane repolarization (GO:0099623)	2
GO_Biological_Process_2018	membrane protein ectodomain proteolysis (GO:0006509)	2
GO_Biological_Process_2018	regulation of receptor biosynthetic process (GO:0010869)	2
GO_Biological_Process_2018	protein carboxylation (GO:0018214)	2
GO_Biological_Process_2018	peptidyl-glutamic acid carboxylation (GO:0017187)	2
GO_Biological_Process_2018	negative regulation of cell cycle G1/S phase transition (GO:1902807)	2
GO_Biological_Process_2018	renal system development (GO:0072001)	2
GO_Biological_Process_2018	sodium ion homeostasis (GO:0055078)	2
GO_Biological_Process_2018	T-helper 17 cell differentiation (GO:0072539)	2
GO_Biological_Process_2018	pyrimidine nucleobase metabolic process (GO:0006206)	2
GO_Biological_Process_2018	aldehyde biosynthetic process (GO:0046184)	2
GO_Biological_Process_2018	positive regulation of interleukin-4 production (GO:0032753)	2
GO_Biological_Process_2018	tRNA transport (GO:0051031)	2
GO_Biological_Process_2018	regulation of protein export from nucleus (GO:0046825)	2
GO_Biological_Process_2018	regulation of cytokine production (GO:0001817)	2
GO_Biological_Process_2018	cellular potassium ion homeostasis (GO:0030007)	2
GO_Biological_Process_2018	positive regulation of T cell chemotaxis (GO:0010820)	2
GO_Biological_Process_2018	oogenesis (GO:0048477)	2
GO_Biological_Process_2018	regulation of glycolytic process (GO:0006110)	2
GO_Biological_Process_2018	protein alpha-1,2-demannosylation (GO:0036508)	2
GO_Biological_Process_2018	mitotic spindle midzone assembly (GO:0051256)	2
GO_Biological_Process_2018	cellular copper ion homeostasis (GO:0006878)	2
GO_Biological_Process_2018	detection of bacterium (GO:0016045)	2
GO_Biological_Process_2018	regulation of T cell chemotaxis (GO:0010819)	2
GO_Biological_Process_2018	respiratory chain complex IV assembly (GO:0008535)	2
GO_Biological_Process_2018	histone-serine phosphorylation (GO:0035404)	2
GO_Biological_Process_2018	positive regulation of protein export from nucleus (GO:0046827)	2
GO_Biological_Process_2018	regulation of gene silencing by miRNA (GO:0060964)	2
GO_Biological_Process_2018	cytoplasmic mRNA processing body assembly (GO:0033962)	2
GO_Biological_Process_2018	mitotic spindle elongation (GO:0000022)	2
GO_Biological_Process_2018	neutrophil degranulation (GO:0043312)	2
GO_Biological_Process_2018	response to retinoic acid (GO:0032526)	2
GO_Biological_Process_2018	regulation of extracellular matrix organization (GO:1903053)	2
GO_Biological_Process_2018	negative regulation of striated muscle tissue development (GO:0045843)	2
GO_Biological_Process_2018	negative regulation of nervous system development (GO:0051961)	2
GO_Biological_Process_2018	cellular response to ketone (GO:1901655)	2
GO_Biological_Process_2018	regulation of viral transcription (GO:0046782)	2
GO_Biological_Process_2018	negative regulation of interleukin-12 production (GO:0032695)	2
GO_Biological_Process_2018	regulation of mitotic spindle assembly (GO:1901673)	2
GO_Biological_Process_2018	protein exit from endoplasmic reticulum (GO:0032527)	2
GO_Biological_Process_2018	cell-cell adhesion mediated by cadherin (GO:0044331)	2
GO_Biological_Process_2018	negative regulation of cell cycle (GO:0045786)	2
GO_Biological_Process_2018	proteasome-mediated ubiquitin-dependent protein catabolic process (GO:0043161)	2
GO_Biological_Process_2018	positive regulation of T cell cytokine production (GO:0002726)	2
GO_Biological_Process_2018	sulfur amino acid biosynthetic process (GO:0000097)	2
GO_Biological_Process_2018	molybdopterin cofactor metabolic process (GO:0043545)	2
GO_Biological_Process_2018	molybdopterin cofactor biosynthetic process (GO:0032324)	2
GO_Biological_Process_2018	positive regulation of immunoglobulin mediated immune response (GO:0002891)	2
GO_Biological_Process_2018	regulation of T-helper 2 cell differentiation (GO:0045628)	2
GO_Biological_Process_2018	stem cell differentiation (GO:0048863)	2
GO_Biological_Process_2018	regulation of protein localization (GO:0032880)	2
GO_Biological_Process_2018	cargo loading into vesicle (GO:0035459)	2
GO_Biological_Process_2018	negative regulation of lymphocyte apoptotic process (GO:0070229)	2
GO_Biological_Process_2018	negative regulation of DNA-templated transcription, elongation (GO:0032785)	2
GO_Biological_Process_2018	ubiquitin-dependent ERAD pathway (GO:0030433)	2
GO_Biological_Process_2018	myotube differentiation (GO:0014902)	2
GO_Biological_Process_2018	nuclear pore organization (GO:0006999)	2
GO_Biological_Process_2018	cellular response to virus (GO:0098586)	2
GO_Biological_Process_2018	proteasomal protein catabolic process (GO:0010498)	2
GO_Biological_Process_2018	antigen processing and presentation of exogenous peptide antigen (GO:0002478)	2
GO_Biological_Process_2018	antigen processing and presentation of exogenous peptide antigen via MHC class II (GO:0019886)	2
GO_Biological_Process_2018	antigen processing and presentation of peptide antigen via MHC class II (GO:0002495)	2
GO_Biological_Process_2018	positive regulation of transcription from RNA polymerase II promoter in response to endoplasmic reticulum stress (GO:1990440)	2
GO_Biological_Process_2018	cytokine-mediated signaling pathway (GO:0019221)	2
GO_Biological_Process_2018	ER overload response (GO:0006983)	2
GO_Biological_Process_2018	regulation of T cell proliferation (GO:0042129)	2
GO_Biological_Process_2018	negative regulation of transcription factor import into nucleus (GO:0042992)	2
GO_Biological_Process_2018	high-density lipoprotein particle remodeling (GO:0034375)	2
GO_Biological_Process_2018	reverse cholesterol transport (GO:0043691)	2
GO_Biological_Process_2018	transcription, DNA-templated (GO:0006351)	2
GO_Biological_Process_2018	inner mitochondrial membrane organization (GO:0007007)	2
GO_Biological_Process_2018	mitochondrial transport (GO:0006839)	2
GO_Biological_Process_2018	positive regulation of transcription from RNA polymerase II promoter in response to stress (GO:0036003)	2
GO_Biological_Process_2018	regulation of keratinocyte differentiation (GO:0045616)	2
GO_Biological_Process_2018	regulation of cytokine secretion involved in immune response (GO:0002739)	2
GO_Biological_Process_2018	beta-catenin-TCF complex assembly (GO:1904837)	2
GO_Biological_Process_2018	Notch receptor processing (GO:0007220)	2
GO_Biological_Process_2018	regulation of membrane repolarization (GO:0060306)	2
GO_Biological_Process_2018	positive regulation of catabolic process (GO:0009896)	2
GO_Biological_Process_2018	telomere maintenance via telomere lengthening (GO:0010833)	2
GO_Biological_Process_2018	positive regulation of lymphocyte proliferation (GO:0050671)	2
GO_Biological_Process_2018	triglyceride-rich lipoprotein particle remodeling (GO:0034370)	2
GO_Biological_Process_2018	high-density lipoprotein particle assembly (GO:0034380)	2
GO_Biological_Process_2018	Notch receptor processing, ligand-dependent (GO:0035333)	2
GO_Biological_Process_2018	telomere maintenance via telomerase (GO:0007004)	2
GO_Biological_Process_2018	regulation of ion transmembrane transport (GO:0034765)	2
GO_Biological_Process_2018	RNA transport (GO:0050658)	2
GO_Biological_Process_2018	regulation of transcription involved in cell fate commitment (GO:0060850)	2
GO_Biological_Process_2018	ATP metabolic process (GO:0046034)	2
GO_Biological_Process_2018	regulation of cholesterol biosynthetic process (GO:0045540)	2
GO_Biological_Process_2018	RNA-dependent DNA biosynthetic process (GO:0006278)	2
GO_Biological_Process_2018	regulation of ventricular cardiac muscle cell membrane repolarization (GO:0060307)	2
GO_Biological_Process_2018	regulation of phosphate metabolic process (GO:0019220)	2
GO_Biological_Process_2018	positive regulation of protein metabolic process (GO:0051247)	2
GO_Biological_Process_2018	nuclear export (GO:0051168)	2
GO_Biological_Process_2018	positive regulation of heterotypic cell-cell adhesion (GO:0034116)	2
GO_Biological_Process_2018	Golgi ribbon formation (GO:0090161)	2
GO_Biological_Process_2018	regulation of muscle cell differentiation (GO:0051147)	2
GO_Biological_Process_2018	glucose homeostasis (GO:0042593)	2
GO_Biological_Process_2018	phosphatidylglycerol acyl-chain remodeling (GO:0036148)	2
GO_Biological_Process_2018	chitin metabolic process (GO:0006030)	2
GO_Biological_Process_2018	chitin catabolic process (GO:0006032)	2
GO_Biological_Process_2018	lipid homeostasis (GO:0055088)	2
GO_Biological_Process_2018	phosphatidylserine metabolic process (GO:0006658)	2
GO_Biological_Process_2018	negative regulation of appetite (GO:0032099)	2
GO_Biological_Process_2018	regulation of mRNA catabolic process (GO:0061013)	2
GO_Biological_Process_2018	histone deacetylation (GO:0016575)	2
GO_Biological_Process_2018	phosphatidylserine acyl-chain remodeling (GO:0036150)	2
GO_Biological_Process_2018	phosphatidylcholine metabolic process (GO:0046470)	2
GO_Biological_Process_2018	phosphatidylglycerol metabolic process (GO:0046471)	2
GO_Biological_Process_2018	organonitrogen compound biosynthetic process (GO:1901566)	2
GO_Biological_Process_2018	phosphatidylinositol acyl-chain remodeling (GO:0036149)	2
GO_Biological_Process_2018	positive regulation of macromolecule biosynthetic process (GO:0010557)	2
GO_Biological_Process_2018	negative regulation of protein binding (GO:0032091)	2
GO_Biological_Process_2018	chaperone-mediated protein transport (GO:0072321)	2
GO_Biological_Process_2018	glucosamine-containing compound catabolic process (GO:1901072)	2
GO_Biological_Process_2018	glutathione metabolic process (GO:0006749)	2
GO_Biological_Process_2018	heart development (GO:0007507)	2
GO_Biological_Process_2018	interleukin-17-mediated signaling pathway (GO:0097400)	2
GO_Biological_Process_2018	cellular response to interleukin-17 (GO:0097398)	2
GO_Biological_Process_2018	sulfur compound biosynthetic process (GO:0044272)	2
GO_Biological_Process_2018	smooth muscle cell differentiation (GO:0051145)	2
GO_Biological_Process_2018	glutathione derivative biosynthetic process (GO:1901687)	2
GO_Biological_Process_2018	glutathione derivative metabolic process (GO:1901685)	2
GO_Biological_Process_2018	TORC1 signaling (GO:0038202)	2
GO_Biological_Process_2018	cell junction maintenance (GO:0034331)	2
GO_Biological_Process_2018	regulation of Wnt signaling pathway (GO:0030111)	2
GO_Biological_Process_2018	positive regulation of acrosome reaction (GO:2000344)	2
GO_Biological_Process_2018	sister chromatid segregation (GO:0000819)	2
GO_Biological_Process_2018	regulation of transcription from RNA polymerase I promoter (GO:0006356)	2
GO_Biological_Process_2018	microtubule polymerization (GO:0046785)	2
GO_Biological_Process_2018	cell differentiation in hindbrain (GO:0021533)	2
GO_Biological_Process_2018	regulation of systemic arterial blood pressure by renin-angiotensin (GO:0003081)	2
GO_Biological_Process_2018	mRNA cleavage involved in mRNA processing (GO:0098787)	2
GO_Biological_Process_2018	histone H2A ubiquitination (GO:0033522)	2
GO_Biological_Process_2018	histone H2A monoubiquitination (GO:0035518)	2
GO_Biological_Process_2018	regulation of vesicle fusion (GO:0031338)	2
GO_Biological_Process_2018	spermine metabolic process (GO:0008215)	2
GO_Biological_Process_2018	negative regulation of G2/M transition of mitotic cell cycle (GO:0010972)	2
GO_Biological_Process_2018	ncRNA 3'-end processing (GO:0043628)	2
GO_Biological_Process_2018	JAK-STAT cascade involved in growth hormone signaling pathway (GO:0060397)	2
GO_Biological_Process_2018	pre-mRNA cleavage required for polyadenylation (GO:0098789)	2
GO_Biological_Process_2018	positive regulation of NF-kappaB transcription factor activity (GO:0051092)	2
GO_Biological_Process_2018	cell junction assembly (GO:0034329)	2
GO_Biological_Process_2018	regulation of protein catabolic process (GO:0042176)	2
GO_Biological_Process_2018	protein import (GO:0017038)	2
GO_Biological_Process_2018	activation of GTPase activity (GO:0090630)	2
GO_Biological_Process_2018	regulation of viral entry into host cell (GO:0046596)	2
GO_Biological_Process_2018	viral process (GO:0016032)	2
GO_Biological_Process_2018	glycerophospholipid biosynthetic process (GO:0046474)	2
GO_Biological_Process_2018	regulation of calcium ion-dependent exocytosis (GO:0017158)	2
GO_Biological_Process_2018	viral translation (GO:0019081)	2
GO_Biological_Process_2018	superoxide anion generation (GO:0042554)	2
GO_Biological_Process_2018	regulation of isotype switching (GO:0045191)	2
GO_Biological_Process_2018	formation of translation preinitiation complex (GO:0001731)	2
GO_Biological_Process_2018	protection from non-homologous end joining at telomere (GO:0031848)	2
GO_Biological_Process_2018	regulation of activation of Janus kinase activity (GO:0010533)	2
GO_Biological_Process_2018	response to increased oxygen levels (GO:0036296)	2
GO_Biological_Process_2018	establishment of protein localization to organelle (GO:0072594)	2
GO_Biological_Process_2018	sulfur compound catabolic process (GO:0044273)	2
GO_Biological_Process_2018	negative regulation of B cell activation (GO:0050869)	2
GO_Biological_Process_2018	regulation of exocytosis (GO:0017157)	2
GO_Biological_Process_2018	Wnt signaling pathway, planar cell polarity pathway (GO:0060071)	2
GO_Biological_Process_2018	sulfate transport (GO:0008272)	2
GO_Biological_Process_2018	inorganic anion transmembrane transport (GO:0098661)	2
GO_Biological_Process_2018	positive regulation of cytoskeleton organization (GO:0051495)	2
GO_Biological_Process_2018	chloride transport (GO:0006821)	2
GO_Biological_Process_2018	positive regulation of actin filament polymerization (GO:0030838)	2
GO_Biological_Process_2018	regulation of viral genome replication (GO:0045069)	2
GO_Biological_Process_2018	negative regulation of viral genome replication (GO:0045071)	2
GO_Biological_Process_2018	positive regulation of STAT cascade (GO:1904894)	2
GO_Biological_Process_2018	semaphorin-plexin signaling pathway (GO:0071526)	2
GO_Biological_Process_2018	regulation of pH (GO:0006885)	2
GO_Biological_Process_2018	oxalate transport (GO:0019532)	2
GO_Biological_Process_2018	septin ring assembly (GO:0000921)	2
GO_Biological_Process_2018	regulation of fatty acid oxidation (GO:0046320)	2
GO_Biological_Process_2018	negative regulation of cellular senescence (GO:2000773)	2
GO_Biological_Process_2018	negative regulation of viral life cycle (GO:1903901)	2
GO_Biological_Process_2018	positive regulation of protein polymerization (GO:0032273)	2
GO_Biological_Process_2018	regulation of bone remodeling (GO:0046850)	2
GO_Biological_Process_2018	septin ring organization (GO:0031106)	2
GO_Biological_Process_2018	positive regulation of filopodium assembly (GO:0051491)	2
GO_Biological_Process_2018	inorganic cation import across plasma membrane (GO:0098659)	2
GO_Biological_Process_2018	cellular response to insulin stimulus (GO:0032869)	2
GO_Biological_Process_2018	negative regulation of cell aging (GO:0090344)	2
GO_Biological_Process_2018	vesicle-mediated transport between endosomal compartments (GO:0098927)	2
GO_Biological_Process_2018	adenylate cyclase-modulating G-protein coupled receptor signaling pathway (GO:0007188)	2
GO_Biological_Process_2018	biomineral tissue development (GO:0031214)	2
GO_Biological_Process_2018	peroxisomal transport (GO:0043574)	2
GO_Biological_Process_2018	membrane depolarization during action potential (GO:0086010)	2
GO_Biological_Process_2018	membrane depolarization (GO:0051899)	2
GO_Biological_Process_2018	regulation of stress fiber assembly (GO:0051492)	2
GO_Biological_Process_2018	endosomal vesicle fusion (GO:0034058)	2
GO_Biological_Process_2018	regulation of autophagy of mitochondrion (GO:1903146)	2
GO_Biological_Process_2018	digestive tract development (GO:0048565)	2
GO_Biological_Process_2018	replicative senescence (GO:0090399)	2
GO_Biological_Process_2018	calcium ion regulated exocytosis (GO:0017156)	2
GO_Biological_Process_2018	icosanoid secretion (GO:0032309)	2
GO_Biological_Process_2018	regulation of autophagosome maturation (GO:1901096)	2
GO_Biological_Process_2018	phagosome maturation (GO:0090382)	2
GO_Biological_Process_2018	positive regulation of TOR signaling (GO:0032008)	2
GO_Biological_Process_2018	adenylate cyclase-inhibiting G-protein coupled acetylcholine receptor signaling pathway (GO:0007197)	2
GO_Biological_Process_2018	positive regulation of cell-substrate adhesion (GO:0010811)	2
GO_Biological_Process_2018	negative regulation of cell cycle G2/M phase transition (GO:1902750)	2
GO_Biological_Process_2018	response to muramyl dipeptide (GO:0032495)	2
GO_Biological_Process_2018	serine family amino acid metabolic process (GO:0009069)	2
GO_Biological_Process_2018	anion transmembrane transport (GO:0098656)	2
GO_Biological_Process_2018	fructose metabolic process (GO:0006000)	2
GO_Biological_Process_2018	adult heart development (GO:0007512)	2
GO_Biological_Process_2018	positive regulation of striated muscle cell differentiation (GO:0051155)	2
GO_Biological_Process_2018	glucose metabolic process (GO:0006006)	2
GO_Biological_Process_2018	pyruvate metabolic process (GO:0006090)	2
GO_Biological_Process_2018	oxoacid metabolic process (GO:0043436)	2
GO_Biological_Process_2018	purine ribonucleoside bisphosphate metabolic process (GO:0034035)	2
GO_Biological_Process_2018	leukotriene metabolic process (GO:0006691)	2
GO_Biological_Process_2018	pyrimidine nucleoside catabolic process (GO:0046135)	2
GO_Biological_Process_2018	phosphatidylethanolamine acyl-chain remodeling (GO:0036152)	2
GO_Biological_Process_2018	telomere maintenance (GO:0000723)	2
GO_Biological_Process_2018	hexose transport (GO:0008645)	2
GO_Biological_Process_2018	DNA damage response, signal transduction resulting in transcription (GO:0042772)	2
GO_Biological_Process_2018	regulation of signal transduction by p53 class mediator (GO:1901796)	2
GO_Biological_Process_2018	negative regulation of viral process (GO:0048525)	2
GO_Biological_Process_2018	DNA damage response, signal transduction by p53 class mediator resulting in transcription of p21 class mediator (GO:0006978)	2
GO_Biological_Process_2018	regulation of macroautophagy (GO:0016241)	2
GO_Biological_Process_2018	negative regulation of endocytosis (GO:0045806)	1
GO_Biological_Process_2018	negative regulation of endothelial cell proliferation (GO:0001937)	1
GO_Biological_Process_2018	cofactor transport (GO:0051181)	1
GO_Biological_Process_2018	positive regulation of binding (GO:0051099)	1
GO_Biological_Process_2018	regulation of cholesterol efflux (GO:0010874)	1
GO_Biological_Process_2018	regulation of cell communication by electrical coupling involved in cardiac conduction (GO:1901844)	1
GO_Biological_Process_2018	positive regulation of heart contraction (GO:0045823)	1
GO_Biological_Process_2018	regulation of dendritic spine development (GO:0060998)	1
GO_Biological_Process_2018	positive regulation of protein dephosphorylation (GO:0035307)	1
GO_Biological_Process_2018	positive regulation of phosphoprotein phosphatase activity (GO:0032516)	1
GO_Biological_Process_2018	membrane raft organization (GO:0031579)	1
GO_Biological_Process_2018	regulation of actin filament length (GO:0030832)	1
GO_Biological_Process_2018	astrocyte development (GO:0014002)	1
GO_Biological_Process_2018	regulation of cardiac muscle contraction by calcium ion signaling (GO:0010882)	1
GO_Biological_Process_2018	positive regulation of protein binding (GO:0032092)	1
GO_Biological_Process_2018	regulation of protein dephosphorylation (GO:0035304)	1
GO_Biological_Process_2018	negative regulation of cholesterol storage (GO:0010887)	1
GO_Biological_Process_2018	smooth muscle tissue development (GO:0048745)	1
GO_Biological_Process_2018	positive regulation of cardiac muscle contraction (GO:0060452)	1
GO_Biological_Process_2018	negative regulation of cellular response to hypoxia (GO:1900038)	1
GO_Biological_Process_2018	regulation of skeletal muscle contraction (GO:0014819)	1
GO_Biological_Process_2018	regulation of endothelial cell migration (GO:0010594)	1
GO_Biological_Process_2018	brain morphogenesis (GO:0048854)	1
GO_Biological_Process_2018	regulation of mRNA polyadenylation (GO:1900363)	1
GO_Biological_Process_2018	regulation of cardiac muscle contraction (GO:0055117)	1
GO_Biological_Process_2018	negative regulation of dephosphorylation (GO:0035305)	1
GO_Biological_Process_2018	regulation of Rho protein signal transduction (GO:0035023)	1
GO_Biological_Process_2018	regulation of neuron death (GO:1901214)	1
GO_Biological_Process_2018	cell wall macromolecule catabolic process (GO:0016998)	1
GO_Biological_Process_2018	regulation of cell communication by electrical coupling (GO:0010649)	1
GO_Biological_Process_2018	negative regulation of interleukin-1 secretion (GO:0050711)	1
GO_Biological_Process_2018	positive regulation of vascular endothelial growth factor receptor signaling pathway (GO:0030949)	1
GO_Biological_Process_2018	intracellular sterol transport (GO:0032366)	1
GO_Biological_Process_2018	negative regulation of nitrogen compound metabolic process (GO:0051172)	1
GO_Biological_Process_2018	pharyngeal arch artery morphogenesis (GO:0061626)	1
GO_Biological_Process_2018	chylomicron remnant clearance (GO:0034382)	1
GO_Biological_Process_2018	regulation of Cdc42 protein signal transduction (GO:0032489)	1
GO_Biological_Process_2018	negative regulation of developmental growth (GO:0048640)	1
GO_Biological_Process_2018	positive regulation of cyclic nucleotide biosynthetic process (GO:0030804)	1
GO_Biological_Process_2018	negative regulation of epithelial cell proliferation (GO:0050680)	1
GO_Biological_Process_2018	cellular response to vascular endothelial growth factor stimulus (GO:0035924)	1
GO_Biological_Process_2018	membrane lipid biosynthetic process (GO:0046467)	1
GO_Biological_Process_2018	positive regulation of cholesterol efflux (GO:0010875)	1
GO_Biological_Process_2018	leukocyte differentiation (GO:0002521)	1
GO_Biological_Process_2018	regulation of endothelial cell chemotaxis (GO:2001026)	1
GO_Biological_Process_2018	cyclic-nucleotide-mediated signaling (GO:0019935)	1
GO_Biological_Process_2018	neuron differentiation (GO:0030182)	1
GO_Biological_Process_2018	lipoprotein transport (GO:0042953)	1
GO_Biological_Process_2018	integrin activation (GO:0033622)	1
GO_Biological_Process_2018	positive regulation of ryanodine-sensitive calcium-release channel activity (GO:0060316)	1
GO_Biological_Process_2018	positive regulation of catenin import into nucleus (GO:0035413)	1
GO_Biological_Process_2018	negative regulation of mRNA polyadenylation (GO:1900364)	1
GO_Biological_Process_2018	peripheral nervous system axon ensheathment (GO:0032292)	1
GO_Biological_Process_2018	lipoprotein localization (GO:0044872)	1
GO_Biological_Process_2018	negative regulation of monooxygenase activity (GO:0032769)	1
GO_Biological_Process_2018	excitatory synapse assembly (GO:1904861)	1
GO_Biological_Process_2018	Schwann cell development (GO:0014044)	1
GO_Biological_Process_2018	regulation of lipid metabolic process (GO:0019216)	1
GO_Biological_Process_2018	regulation of supramolecular fiber organization (GO:1902903)	1
GO_Biological_Process_2018	positive regulation of organelle assembly (GO:1902117)	1
GO_Biological_Process_2018	second-messenger-mediated signaling (GO:0019932)	1
GO_Biological_Process_2018	positive regulation of cysteine-type endopeptidase activity involved in apoptotic process (GO:0043280)	1
GO_Biological_Process_2018	positive regulation of dendritic spine development (GO:0060999)	1
GO_Biological_Process_2018	negative regulation of actin filament bundle assembly (GO:0032232)	1
GO_Biological_Process_2018	dopaminergic neuron differentiation (GO:0071542)	1
GO_Biological_Process_2018	negative regulation of receptor-mediated endocytosis (GO:0048261)	1
GO_Biological_Process_2018	negative regulation of interleukin-1 beta production (GO:0032691)	1
GO_Biological_Process_2018	transcription initiation from RNA polymerase II promoter (GO:0006367)	1
GO_Biological_Process_2018	regulation of interleukin-8 production (GO:0032677)	1
GO_Biological_Process_2018	activation of cysteine-type endopeptidase activity involved in apoptotic process (GO:0006919)	1
GO_Biological_Process_2018	pyroptosis (GO:0070269)	1
GO_Biological_Process_2018	positive regulation of glycoprotein biosynthetic process (GO:0010560)	1
GO_Biological_Process_2018	immunological synapse formation (GO:0001771)	1
GO_Biological_Process_2018	positive regulation of lymphocyte migration (GO:2000403)	1
GO_Biological_Process_2018	cytoskeleton organization (GO:0007010)	1
GO_Biological_Process_2018	positive regulation of chromatin silencing (GO:0031937)	1
GO_Biological_Process_2018	positive regulation of lyase activity (GO:0051349)	1
GO_Biological_Process_2018	cellular glucuronidation (GO:0052695)	1
GO_Biological_Process_2018	regulation of lymphocyte activation (GO:0051249)	1
GO_Biological_Process_2018	myelin assembly (GO:0032288)	1
GO_Biological_Process_2018	nuclear envelope reassembly (GO:0031468)	1
GO_Biological_Process_2018	regulation of ion homeostasis (GO:2000021)	1
GO_Biological_Process_2018	glucuronate metabolic process (GO:0019585)	1
GO_Biological_Process_2018	morphogenesis of an epithelium (GO:0002009)	1
GO_Biological_Process_2018	response to organic cyclic compound (GO:0014070)	1
GO_Biological_Process_2018	mitotic nuclear envelope reassembly (GO:0007084)	1
GO_Biological_Process_2018	regulation of dendritic cell apoptotic process (GO:2000668)	1
GO_Biological_Process_2018	negative regulation of type I interferon-mediated signaling pathway (GO:0060339)	1
GO_Biological_Process_2018	regulation of glial cell differentiation (GO:0045685)	1
GO_Biological_Process_2018	white fat cell differentiation (GO:0050872)	1
GO_Biological_Process_2018	gland morphogenesis (GO:0022612)	1
GO_Biological_Process_2018	positive regulation of antigen processing and presentation (GO:0002579)	1
GO_Biological_Process_2018	cellular response to magnesium ion (GO:0071286)	1
GO_Biological_Process_2018	positive regulation of dendritic cell antigen processing and presentation (GO:0002606)	1
GO_Biological_Process_2018	single strand break repair (GO:0000012)	1
GO_Biological_Process_2018	response to alcohol (GO:0097305)	1
GO_Biological_Process_2018	positive regulation of peptidyl-threonine phosphorylation (GO:0010800)	1
GO_Biological_Process_2018	sodium ion transmembrane transport (GO:0035725)	1
GO_Biological_Process_2018	regulation of cell division (GO:0051302)	1
GO_Biological_Process_2018	T cell proliferation (GO:0042098)	1
GO_Biological_Process_2018	low-density lipoprotein receptor particle metabolic process (GO:0032799)	1
GO_Biological_Process_2018	negative regulation of cytokine biosynthetic process (GO:0042036)	1
GO_Biological_Process_2018	protein-DNA complex disassembly (GO:0032986)	1
GO_Biological_Process_2018	positive regulation of cardiac muscle hypertrophy (GO:0010613)	1
GO_Biological_Process_2018	positive regulation of cyclic nucleotide metabolic process (GO:0030801)	1
GO_Biological_Process_2018	dendritic cell chemotaxis (GO:0002407)	1
GO_Biological_Process_2018	amino acid transmembrane transport (GO:0003333)	1
GO_Biological_Process_2018	anterograde trans-synaptic signaling (GO:0098916)	1
GO_Biological_Process_2018	amino acid transport (GO:0006865)	1
GO_Biological_Process_2018	toll-like receptor 9 signaling pathway (GO:0034162)	1
GO_Biological_Process_2018	neutral amino acid transport (GO:0015804)	1
GO_Biological_Process_2018	toll-like receptor signaling pathway (GO:0002224)	1
GO_Biological_Process_2018	alanine transport (GO:0032328)	1
GO_Biological_Process_2018	positive regulation of production of molecular mediator of immune response (GO:0002702)	1
GO_Biological_Process_2018	detection of mechanical stimulus involved in sensory perception (GO:0050974)	1
GO_Biological_Process_2018	L-alanine transport (GO:0015808)	1
GO_Biological_Process_2018	negative regulation of necrotic cell death (GO:0060547)	1
GO_Biological_Process_2018	carboxylic acid transport (GO:0046942)	1
GO_Biological_Process_2018	homophilic cell adhesion via plasma membrane adhesion molecules (GO:0007156)	1
GO_Biological_Process_2018	negative regulation of cell projection organization (GO:0031345)	1
GO_Biological_Process_2018	positive regulation of B cell proliferation (GO:0030890)	1
GO_Biological_Process_2018	I-kappaB kinase/NF-kappaB signaling (GO:0007249)	1
GO_Biological_Process_2018	organic anion transport (GO:0015711)	1
GO_Biological_Process_2018	cell migration involved in heart development (GO:0060973)	1
GO_Biological_Process_2018	B cell mediated immunity (GO:0019724)	1
GO_Biological_Process_2018	positive regulation of DNA damage response, signal transduction by p53 class mediator (GO:0043517)	1
GO_Biological_Process_2018	negative regulation of JAK-STAT cascade (GO:0046426)	1
GO_Biological_Process_2018	regulation of neuron projection development (GO:0010975)	1
GO_Biological_Process_2018	pattern recognition receptor signaling pathway (GO:0002221)	1
GO_Biological_Process_2018	positive regulation of cytokine production involved in immune response (GO:0002720)	1
GO_Biological_Process_2018	positive regulation of aspartic-type peptidase activity (GO:1905247)	1
GO_Biological_Process_2018	negative regulation of DNA repair (GO:0045738)	1
GO_Biological_Process_2018	positive regulation of intracellular estrogen receptor signaling pathway (GO:0033148)	1
GO_Biological_Process_2018	positive regulation of aspartic-type endopeptidase activity involved in amyloid precursor protein catabolic process (GO:1902961)	1
GO_Biological_Process_2018	negative regulation of catecholamine secretion (GO:0033604)	1
GO_Biological_Process_2018	negative regulation of digestive system process (GO:0060457)	1
GO_Biological_Process_2018	embryonic forelimb morphogenesis (GO:0035115)	1
GO_Biological_Process_2018	sphingoid biosynthetic process (GO:0046520)	1
GO_Biological_Process_2018	proline transport (GO:0015824)	1
GO_Biological_Process_2018	positive regulation of interferon-beta production (GO:0032728)	1
GO_Biological_Process_2018	neuropeptide signaling pathway (GO:0007218)	1
GO_Biological_Process_2018	DNA double-strand break processing (GO:0000729)	1
GO_Biological_Process_2018	cation transport (GO:0006812)	1
GO_Biological_Process_2018	membrane assembly (GO:0071709)	1
GO_Biological_Process_2018	cardiolipin metabolic process (GO:0032048)	1
GO_Biological_Process_2018	cranial nerve development (GO:0021545)	1
GO_Biological_Process_2018	secretion (GO:0046903)	1
GO_Biological_Process_2018	regulation of T cell cytokine production (GO:0002724)	1
GO_Biological_Process_2018	glomerular visceral epithelial cell differentiation (GO:0072112)	1
GO_Biological_Process_2018	canonical Wnt signaling pathway (GO:0060070)	1
GO_Biological_Process_2018	regulation of peptide hormone secretion (GO:0090276)	1
GO_Biological_Process_2018	dorsal/ventral axis specification (GO:0009950)	1
GO_Biological_Process_2018	forelimb morphogenesis (GO:0035136)	1
GO_Biological_Process_2018	adrenal gland development (GO:0030325)	1
GO_Biological_Process_2018	phosphatidylglycerol biosynthetic process (GO:0006655)	1
GO_Biological_Process_2018	positive regulation of glial cell differentiation (GO:0045687)	1
GO_Biological_Process_2018	cellular response to acid chemical (GO:0071229)	1
GO_Biological_Process_2018	regulation of mitochondrial membrane permeability involved in apoptotic process (GO:1902108)	1
GO_Biological_Process_2018	pri-miRNA transcription from RNA polymerase II promoter (GO:0061614)	1
GO_Biological_Process_2018	positive regulation of membrane depolarization (GO:1904181)	1
GO_Biological_Process_2018	cardiac muscle cell-cardiac muscle cell adhesion (GO:0086042)	1
GO_Biological_Process_2018	negative regulation of stress fiber assembly (GO:0051497)	1
GO_Biological_Process_2018	regulation of tyrosine phosphorylation of STAT protein (GO:0042509)	1
GO_Biological_Process_2018	non-motile cilium assembly (GO:1905515)	1
GO_Biological_Process_2018	regulation of interleukin-2 production (GO:0032663)	1
GO_Biological_Process_2018	hepaticobiliary system development (GO:0061008)	1
GO_Biological_Process_2018	positive regulation of neuron projection development (GO:0010976)	1
GO_Biological_Process_2018	positive regulation of transcription from RNA polymerase II promoter (GO:0045944)	1
GO_Biological_Process_2018	spliceosomal snRNP assembly (GO:0000387)	1
GO_Biological_Process_2018	positive regulation of organelle organization (GO:0010638)	1
GO_Biological_Process_2018	piRNA metabolic process (GO:0034587)	1
GO_Biological_Process_2018	regulation of ion transmembrane transporter activity (GO:0032412)	1
GO_Biological_Process_2018	rRNA base methylation (GO:0070475)	1
GO_Biological_Process_2018	response to axon injury (GO:0048678)	1
GO_Biological_Process_2018	negative regulation of chemotaxis (GO:0050922)	1
GO_Biological_Process_2018	carnitine metabolic process (GO:0009437)	1
GO_Biological_Process_2018	regulation of ventricular cardiac muscle cell action potential (GO:0098911)	1
GO_Biological_Process_2018	positive regulation of chemokine production (GO:0032722)	1
GO_Biological_Process_2018	cation transmembrane transport (GO:0098655)	1
GO_Biological_Process_2018	monovalent inorganic cation transport (GO:0015672)	1
GO_Biological_Process_2018	regulation of peptidyl-serine phosphorylation (GO:0033135)	1
GO_Biological_Process_2018	coenzyme metabolic process (GO:0006732)	1
GO_Biological_Process_2018	peptidyl-cysteine modification (GO:0018198)	1
GO_Biological_Process_2018	positive regulation of interleukin-8 biosynthetic process (GO:0045416)	1
GO_Biological_Process_2018	cardiolipin biosynthetic process (GO:0032049)	1
GO_Biological_Process_2018	bundle of His cell to Purkinje myocyte communication (GO:0086069)	1
GO_Biological_Process_2018	diol biosynthetic process (GO:0034312)	1
GO_Biological_Process_2018	regulation of aspartic-type endopeptidase activity involved in amyloid precursor protein catabolic process (GO:1902959)	1
GO_Biological_Process_2018	sphingosine biosynthetic process (GO:0046512)	1
GO_Biological_Process_2018	glomerular visceral epithelial cell development (GO:0072015)	1
GO_Biological_Process_2018	regulation of histone H4 acetylation (GO:0090239)	1
GO_Biological_Process_2018	positive regulation of viral release from host cell (GO:1902188)	1
GO_Biological_Process_2018	regulation of mast cell degranulation (GO:0043304)	1
GO_Biological_Process_2018	mRNA splicing, via spliceosome (GO:0000398)	1
GO_Biological_Process_2018	positive regulation of adherens junction organization (GO:1903393)	1
GO_Biological_Process_2018	metal ion transport (GO:0030001)	1
GO_Biological_Process_2018	erythrocyte development (GO:0048821)	1
GO_Biological_Process_2018	receptor clustering (GO:0043113)	1
GO_Biological_Process_2018	synaptic transmission, GABAergic (GO:0051932)	1
GO_Biological_Process_2018	clathrin-dependent endocytosis (GO:0072583)	1
GO_Biological_Process_2018	protein localization to endoplasmic reticulum exit site (GO:0070973)	1
GO_Biological_Process_2018	negative regulation of glial cell proliferation (GO:0060253)	1
GO_Biological_Process_2018	regulation of sarcomere organization (GO:0060297)	1
GO_Biological_Process_2018	negative regulation of leukocyte apoptotic process (GO:2000107)	1
GO_Biological_Process_2018	regulation of retrograde protein transport, ER to cytosol (GO:1904152)	1
GO_Biological_Process_2018	negative regulation of catalytic activity (GO:0043086)	1
GO_Biological_Process_2018	regulation of G1/S transition of mitotic cell cycle (GO:2000045)	1
GO_Biological_Process_2018	positive regulation of ubiquitin-protein transferase activity (GO:0051443)	1
GO_Biological_Process_2018	B cell activation involved in immune response (GO:0002312)	1
GO_Biological_Process_2018	semaphorin-plexin signaling pathway involved in neuron projection guidance (GO:1902285)	1
GO_Biological_Process_2018	cellular defense response (GO:0006968)	1
GO_Biological_Process_2018	negative regulation of stem cell differentiation (GO:2000737)	1
GO_Biological_Process_2018	cellular response to interferon-alpha (GO:0035457)	1
GO_Biological_Process_2018	neurotransmitter receptor transport, postsynaptic endosome to lysosome (GO:0098943)	1
GO_Biological_Process_2018	regulation of potassium ion transmembrane transport (GO:1901379)	1
GO_Biological_Process_2018	aminoglycan biosynthetic process (GO:0006023)	1
GO_Biological_Process_2018	regulation of hemopoiesis (GO:1903706)	1
GO_Biological_Process_2018	UDP-N-acetylglucosamine biosynthetic process (GO:0006048)	1
GO_Biological_Process_2018	isotype switching (GO:0045190)	1
GO_Biological_Process_2018	positive regulation of cell development (GO:0010720)	1
GO_Biological_Process_2018	regulation of DNA methylation (GO:0044030)	1
GO_Biological_Process_2018	acylglycerol acyl-chain remodeling (GO:0036155)	1
GO_Biological_Process_2018	positive regulation of TORC1 signaling (GO:1904263)	1
GO_Biological_Process_2018	positive regulation of peptidyl-lysine acetylation (GO:2000758)	1
GO_Biological_Process_2018	regulation of G0 to G1 transition (GO:0070316)	1
GO_Biological_Process_2018	positive regulation of mononuclear cell migration (GO:0071677)	1
GO_Biological_Process_2018	positive regulation of monocyte chemotaxis (GO:0090026)	1
GO_Biological_Process_2018	mitotic nuclear envelope disassembly (GO:0007077)	1
GO_Biological_Process_2018	purine ribonucleoside monophosphate metabolic process (GO:0009167)	1
GO_Biological_Process_2018	nucleobase-containing small molecule catabolic process (GO:0034656)	1
GO_Biological_Process_2018	nuclear envelope disassembly (GO:0051081)	1
GO_Biological_Process_2018	peptidyl-lysine methylation (GO:0018022)	1
GO_Biological_Process_2018	cellular response to UV-B (GO:0071493)	1
GO_Biological_Process_2018	negative regulation of cell development (GO:0010721)	1
GO_Biological_Process_2018	transcription from RNA polymerase III promoter (GO:0006383)	1
GO_Biological_Process_2018	regulation of monocyte chemotaxis (GO:0090025)	1
GO_Biological_Process_2018	cellular response to UV (GO:0034644)	1
GO_Biological_Process_2018	response to UV-B (GO:0010224)	1
GO_Biological_Process_2018	acute inflammatory response (GO:0002526)	1
GO_Biological_Process_2018	regulation of monooxygenase activity (GO:0032768)	1
GO_Biological_Process_2018	positive regulation of cell junction assembly (GO:1901890)	1
GO_Biological_Process_2018	regulation of chromosome segregation (GO:0051983)	1
GO_Biological_Process_2018	negative regulation by host of viral process (GO:0044793)	1
GO_Biological_Process_2018	regulation of vascular smooth muscle cell proliferation (GO:1904705)	1
GO_Biological_Process_2018	lipoxin biosynthetic process (GO:2001301)	1
GO_Biological_Process_2018	aortic valve development (GO:0003176)	1
GO_Biological_Process_2018	lymphoid progenitor cell differentiation (GO:0002320)	1
GO_Biological_Process_2018	aortic valve morphogenesis (GO:0003180)	1
GO_Biological_Process_2018	succinyl-CoA metabolic process (GO:0006104)	1
GO_Biological_Process_2018	sensory perception (GO:0007600)	1
GO_Biological_Process_2018	organelle disassembly (GO:1903008)	1
GO_Biological_Process_2018	positive regulation of T cell migration (GO:2000406)	1
GO_Biological_Process_2018	mitochondrial respiratory chain complex IV assembly (GO:0033617)	1
GO_Biological_Process_2018	cellular sodium ion homeostasis (GO:0006883)	1
GO_Biological_Process_2018	regulation of carbohydrate catabolic process (GO:0043470)	1
GO_Biological_Process_2018	positive regulation of leukocyte chemotaxis (GO:0002690)	1
GO_Biological_Process_2018	nucleobase-containing compound catabolic process (GO:0034655)	1
GO_Biological_Process_2018	mitochondrial respiratory chain complex IV biogenesis (GO:0097034)	1
GO_Biological_Process_2018	regulation of RNA polymerase II transcriptional preinitiation complex assembly (GO:0045898)	1
GO_Biological_Process_2018	postsynaptic membrane organization (GO:0001941)	1
GO_Biological_Process_2018	tRNA-containing ribonucleoprotein complex export from nucleus (GO:0071431)	1
GO_Biological_Process_2018	regulation of cell-substrate adhesion (GO:0010810)	1
GO_Biological_Process_2018	tRNA export from nucleus (GO:0006409)	1
GO_Biological_Process_2018	regulation of Notch signaling pathway (GO:0008593)	1
GO_Biological_Process_2018	regulation of coenzyme metabolic process (GO:0051196)	1
GO_Biological_Process_2018	ornithine transport (GO:0015822)	1
GO_Biological_Process_2018	regulation of toll-like receptor 9 signaling pathway (GO:0034163)	1
GO_Biological_Process_2018	peroxisome proliferator activated receptor signaling pathway (GO:0035357)	1
GO_Biological_Process_2018	positive regulation of inositol phosphate biosynthetic process (GO:0060732)	1
GO_Biological_Process_2018	tRNA transcription (GO:0009304)	1
GO_Biological_Process_2018	regulation of pinocytosis (GO:0048548)	1
GO_Biological_Process_2018	cellular response to platelet-derived growth factor stimulus (GO:0036120)	1
GO_Biological_Process_2018	regulation of tube diameter (GO:0035296)	1
GO_Biological_Process_2018	regulation of natural killer cell mediated cytotoxicity (GO:0042269)	1
GO_Biological_Process_2018	synaptic vesicle transport (GO:0048489)	1
GO_Biological_Process_2018	cellular monovalent inorganic cation homeostasis (GO:0030004)	1
GO_Biological_Process_2018	negative regulation of vascular smooth muscle cell proliferation (GO:1904706)	1
GO_Biological_Process_2018	purine nucleoside monophosphate biosynthetic process (GO:0009127)	1
GO_Biological_Process_2018	regulation of vascular endothelial cell proliferation (GO:1905562)	1
GO_Biological_Process_2018	dermatan sulfate biosynthetic process (GO:0030208)	1
GO_Biological_Process_2018	negative regulation of ATPase activity (GO:0032780)	1
GO_Biological_Process_2018	negative regulation of JUN kinase activity (GO:0043508)	1
GO_Biological_Process_2018	negative regulation of JNK cascade (GO:0046329)	1
GO_Biological_Process_2018	cardiocyte differentiation (GO:0035051)	1
GO_Biological_Process_2018	regulation of B cell apoptotic process (GO:0002902)	1
GO_Biological_Process_2018	response to catecholamine (GO:0071869)	1
GO_Biological_Process_2018	cellular response to monoamine stimulus (GO:0071868)	1
GO_Biological_Process_2018	regulation of response to biotic stimulus (GO:0002831)	1
GO_Biological_Process_2018	negative regulation of alpha-beta T cell activation (GO:0046636)	1
GO_Biological_Process_2018	negative regulation of B cell apoptotic process (GO:0002903)	1
GO_Biological_Process_2018	regulation of establishment of protein localization (GO:0070201)	1
GO_Biological_Process_2018	ribonucleoprotein complex assembly (GO:0022618)	1
GO_Biological_Process_2018	cellular response to hypoxia (GO:0071456)	1
GO_Biological_Process_2018	protein sumoylation (GO:0016925)	1
GO_Biological_Process_2018	endothelial cell differentiation (GO:0045446)	1
GO_Biological_Process_2018	response to iron ion (GO:0010039)	1
GO_Biological_Process_2018	striated muscle cell differentiation (GO:0051146)	1
GO_Biological_Process_2018	positive regulation of excitatory postsynaptic potential (GO:2000463)	1
GO_Biological_Process_2018	membrane fusion (GO:0061025)	1
GO_Biological_Process_2018	cellular response to purine-containing compound (GO:0071415)	1
GO_Biological_Process_2018	basement membrane organization (GO:0071711)	1
GO_Biological_Process_2018	positive regulation of RNA polymerase II transcriptional preinitiation complex assembly (GO:0045899)	1
GO_Biological_Process_2018	oligosaccharide biosynthetic process (GO:0009312)	1
GO_Biological_Process_2018	intrinsic apoptotic signaling pathway in response to DNA damage (GO:0008630)	1
GO_Biological_Process_2018	thymus development (GO:0048538)	1
GO_Biological_Process_2018	oligodendrocyte differentiation (GO:0048709)	1
GO_Biological_Process_2018	regulation of JUN kinase activity (GO:0043506)	1
GO_Biological_Process_2018	cellular response to decreased oxygen levels (GO:0036294)	1
GO_Biological_Process_2018	protein localization to organelle (GO:0033365)	1
GO_Biological_Process_2018	regulation of mitotic spindle organization (GO:0060236)	1
GO_Biological_Process_2018	positive regulation of Wnt signaling pathway (GO:0030177)	1
GO_Biological_Process_2018	negative regulation of natural killer cell mediated cytotoxicity (GO:0045953)	1
GO_Biological_Process_2018	Cdc42 protein signal transduction (GO:0032488)	1
GO_Biological_Process_2018	regulation of striated muscle tissue development (GO:0016202)	1
GO_Biological_Process_2018	dynamin family protein polymerization involved in mitochondrial fission (GO:0003374)	1
GO_Biological_Process_2018	regulation of glycoprotein biosynthetic process (GO:0010559)	1
GO_Biological_Process_2018	dynamin family protein polymerization involved in membrane fission (GO:0003373)	1
GO_Biological_Process_2018	cardiac muscle cell differentiation (GO:0055007)	1
GO_Biological_Process_2018	presynapse assembly (GO:0099054)	1
GO_Biological_Process_2018	regulation of T cell mediated cytotoxicity (GO:0001914)	1
GO_Biological_Process_2018	regulation of branching involved in ureteric bud morphogenesis (GO:0090189)	1
GO_Biological_Process_2018	negative regulation of binding (GO:0051100)	1
GO_Biological_Process_2018	positive regulation of epithelial cell migration (GO:0010634)	1
GO_Biological_Process_2018	antigen processing and presentation of peptide antigen via MHC class I (GO:0002474)	1
GO_Biological_Process_2018	regulation of potassium ion transmembrane transporter activity (GO:1901016)	1
GO_Biological_Process_2018	response to unfolded protein (GO:0006986)	1
GO_Biological_Process_2018	interferon-gamma-mediated signaling pathway (GO:0060333)	1
GO_Biological_Process_2018	antigen processing and presentation of exogenous peptide antigen via MHC class I, TAP-independent (GO:0002480)	1
GO_Biological_Process_2018	positive regulation of urine volume (GO:0035810)	1
GO_Biological_Process_2018	cellular response to unfolded protein (GO:0034620)	1
GO_Biological_Process_2018	negative regulation of response to biotic stimulus (GO:0002832)	1
GO_Biological_Process_2018	regulation of urine volume (GO:0035809)	1
GO_Biological_Process_2018	receptor guanylyl cyclase signaling pathway (GO:0007168)	1
GO_Biological_Process_2018	positive regulation of response to endoplasmic reticulum stress (GO:1905898)	1
GO_Biological_Process_2018	organic cyclic compound biosynthetic process (GO:1901362)	1
GO_Biological_Process_2018	'de novo' posttranslational protein folding (GO:0051084)	1
GO_Biological_Process_2018	regulation of response to cytokine stimulus (GO:0060759)	1
GO_Biological_Process_2018	cellular response to topologically incorrect protein (GO:0035967)	1
GO_Biological_Process_2018	mitochondrial translational termination (GO:0070126)	1
GO_Biological_Process_2018	chaperone-mediated protein complex assembly (GO:0051131)	1
GO_Biological_Process_2018	positive regulation of neural precursor cell proliferation (GO:2000179)	1
GO_Biological_Process_2018	amyloid-beta metabolic process (GO:0050435)	1
GO_Biological_Process_2018	regulation of protein modification by small protein conjugation or removal (GO:1903320)	1
GO_Biological_Process_2018	negative regulation of defense response to virus (GO:0050687)	1
GO_Biological_Process_2018	chaperone mediated protein folding requiring cofactor (GO:0051085)	1
GO_Biological_Process_2018	mitochondrial ATP synthesis coupled proton transport (GO:0042776)	1
GO_Biological_Process_2018	positive regulation of phagocytosis (GO:0050766)	1
GO_Biological_Process_2018	mitochondrial translational elongation (GO:0070125)	1
GO_Biological_Process_2018	sterol metabolic process (GO:0016125)	1
GO_Biological_Process_2018	protein localization to plasma membrane (GO:0072659)	1
GO_Biological_Process_2018	hindlimb morphogenesis (GO:0035137)	1
GO_Biological_Process_2018	regulation of cardiac muscle hypertrophy in response to stress (GO:1903242)	1
GO_Biological_Process_2018	neuron remodeling (GO:0016322)	1
GO_Biological_Process_2018	positive regulation of podosome assembly (GO:0071803)	1
GO_Biological_Process_2018	protein K48-linked ubiquitination (GO:0070936)	1
GO_Biological_Process_2018	serine family amino acid biosynthetic process (GO:0009070)	1
GO_Biological_Process_2018	kinetochore organization (GO:0051383)	1
GO_Biological_Process_2018	endosome transport via multivesicular body sorting pathway (GO:0032509)	1
GO_Biological_Process_2018	neuron maturation (GO:0042551)	1
GO_Biological_Process_2018	regulation of rhodopsin mediated signaling pathway (GO:0022400)	1
GO_Biological_Process_2018	protein complex subunit organization (GO:0071822)	1
GO_Biological_Process_2018	osteoclast differentiation (GO:0030316)	1
GO_Biological_Process_2018	phosphatidylinositol 3-kinase signaling (GO:0014065)	1
GO_Biological_Process_2018	zinc II ion transmembrane transport (GO:0071577)	1
GO_Biological_Process_2018	ammonium transport (GO:0015696)	1
GO_Biological_Process_2018	endoplasmic reticulum to cytosol transport (GO:1903513)	1
GO_Biological_Process_2018	ruffle organization (GO:0031529)	1
GO_Biological_Process_2018	phospholipid transport (GO:0015914)	1
GO_Biological_Process_2018	translational termination (GO:0006415)	1
GO_Biological_Process_2018	cristae formation (GO:0042407)	1
GO_Biological_Process_2018	translational elongation (GO:0006414)	1
GO_Biological_Process_2018	regulation of execution phase of apoptosis (GO:1900117)	1
GO_Biological_Process_2018	membrane repolarization (GO:0086009)	1
GO_Biological_Process_2018	intrinsic apoptotic signaling pathway (GO:0097193)	1
GO_Biological_Process_2018	protein homooligomerization (GO:0051260)	1
GO_Biological_Process_2018	positive regulation of steroid metabolic process (GO:0045940)	1
GO_Biological_Process_2018	chylomicron assembly (GO:0034378)	1
GO_Biological_Process_2018	negative regulation of lipopolysaccharide-mediated signaling pathway (GO:0031665)	1
GO_Biological_Process_2018	regulation of neuroblast proliferation (GO:1902692)	1
GO_Biological_Process_2018	muscle cell migration (GO:0014812)	1
GO_Biological_Process_2018	membrane raft polarization (GO:0001766)	1
GO_Biological_Process_2018	phosphate ion transmembrane transport (GO:0035435)	1
GO_Biological_Process_2018	positive regulation of apoptotic cell clearance (GO:2000427)	1
GO_Biological_Process_2018	membrane raft distribution (GO:0031580)	1
GO_Biological_Process_2018	regulation of sterol transport (GO:0032371)	1
GO_Biological_Process_2018	positive regulation of mitotic sister chromatid separation (GO:1901970)	1
GO_Biological_Process_2018	positive regulation of neuroblast proliferation (GO:0002052)	1
GO_Biological_Process_2018	glyoxylate metabolic process (GO:0046487)	1
GO_Biological_Process_2018	positive regulation of metaphase/anaphase transition of cell cycle (GO:1902101)	1
GO_Biological_Process_2018	transcription elongation from RNA polymerase I promoter (GO:0006362)	1
GO_Biological_Process_2018	mitochondrial translation (GO:0032543)	1
GO_Biological_Process_2018	ceramide biosynthetic process (GO:0046513)	1
GO_Biological_Process_2018	organophosphate biosynthetic process (GO:0090407)	1
GO_Biological_Process_2018	microtubule cytoskeleton organization involved in mitosis (GO:1902850)	1
GO_Biological_Process_2018	negative regulation of cytokine secretion (GO:0050710)	1
GO_Biological_Process_2018	positive regulation of cytokine production (GO:0001819)	1
GO_Biological_Process_2018	protein localization to cell periphery (GO:1990778)	1
GO_Biological_Process_2018	regulation of defense response to virus (GO:0050688)	1
GO_Biological_Process_2018	protein oligomerization (GO:0051259)	1
GO_Biological_Process_2018	protein autoubiquitination (GO:0051865)	1
GO_Biological_Process_2018	vascular endothelial growth factor receptor signaling pathway (GO:0048010)	1
GO_Biological_Process_2018	negative regulation of multi-organism process (GO:0043901)	1
GO_Biological_Process_2018	epithelial cell differentiation (GO:0030855)	1
GO_Biological_Process_2018	regulation of lipopolysaccharide-mediated signaling pathway (GO:0031664)	1
GO_Biological_Process_2018	retrograde protein transport, ER to cytosol (GO:0030970)	1
GO_Biological_Process_2018	maintenance of protein localization in organelle (GO:0072595)	1
GO_Biological_Process_2018	nitric oxide biosynthetic process (GO:0006809)	1
GO_Biological_Process_2018	immune response-regulating cell surface receptor signaling pathway (GO:0002768)	1
GO_Biological_Process_2018	L-serine metabolic process (GO:0006563)	1
GO_Biological_Process_2018	membrane repolarization during action potential (GO:0086011)	1
GO_Biological_Process_2018	T cell activation (GO:0042110)	1
GO_Biological_Process_2018	DNA-templated transcription, termination (GO:0006353)	1
GO_Biological_Process_2018	wound healing (GO:0042060)	1
GO_Biological_Process_2018	regulation of DNA metabolic process (GO:0051052)	1
GO_Biological_Process_2018	positive regulation of insulin receptor signaling pathway (GO:0046628)	1
GO_Biological_Process_2018	tRNA methylation (GO:0030488)	1
GO_Biological_Process_2018	establishment of protein localization to mitochondrion (GO:0072655)	1
GO_Biological_Process_2018	regulation of response to stress (GO:0080134)	1
GO_Biological_Process_2018	skeletal muscle thin filament assembly (GO:0030240)	1
GO_Biological_Process_2018	chromatin silencing at telomere (GO:0006348)	1
GO_Biological_Process_2018	regulation of NAD(P)H oxidase activity (GO:0033860)	1
GO_Biological_Process_2018	UV-damage excision repair (GO:0070914)	1
GO_Biological_Process_2018	peptidyl-serine modification (GO:0018209)	1
GO_Biological_Process_2018	negative regulation of oxidative stress-induced cell death (GO:1903202)	1
GO_Biological_Process_2018	negative regulation of oxidative stress-induced intrinsic apoptotic signaling pathway (GO:1902176)	1
GO_Biological_Process_2018	peptidyl-serine phosphorylation (GO:0018105)	1
GO_Biological_Process_2018	cargo loading into COPII-coated vesicle (GO:0090110)	1
GO_Biological_Process_2018	regulation of sequestering of triglyceride (GO:0010889)	1
GO_Biological_Process_2018	skeletal myofibril assembly (GO:0014866)	1
GO_Biological_Process_2018	regulation of epithelial cell migration (GO:0010632)	1
GO_Biological_Process_2018	positive regulation of mitotic cell cycle spindle assembly checkpoint (GO:0090267)	1
GO_Biological_Process_2018	G-quadruplex DNA unwinding (GO:0044806)	1
GO_Biological_Process_2018	response to interferon-beta (GO:0035456)	1
GO_Biological_Process_2018	mitochondrial genome maintenance (GO:0000002)	1
GO_Biological_Process_2018	negative regulation of lipase activity (GO:0060192)	1
GO_Biological_Process_2018	positive regulation of spindle checkpoint (GO:0090232)	1
GO_Biological_Process_2018	regulation of MHC class II biosynthetic process (GO:0045346)	1
GO_Biological_Process_2018	regulation of peroxisome proliferator activated receptor signaling pathway (GO:0035358)	1
GO_Biological_Process_2018	protein dephosphorylation (GO:0006470)	1
GO_Biological_Process_2018	response to insulin (GO:0032868)	1
GO_Biological_Process_2018	negative regulation of lipid catabolic process (GO:0050995)	1
GO_Biological_Process_2018	positive regulation of cellular response to insulin stimulus (GO:1900078)	1
GO_Biological_Process_2018	positive regulation of alpha-beta T cell activation (GO:0046635)	1
GO_Biological_Process_2018	positive regulation of voltage-gated potassium channel activity (GO:1903818)	1
GO_Biological_Process_2018	epithelial cell apoptotic process (GO:1904019)	1
GO_Biological_Process_2018	anoikis (GO:0043276)	1
GO_Biological_Process_2018	neuron projection organization (GO:0106027)	1
GO_Biological_Process_2018	regulation of ER-associated ubiquitin-dependent protein catabolic process (GO:1903069)	1
GO_Biological_Process_2018	histone H3-K4 methylation (GO:0051568)	1
GO_Biological_Process_2018	regulation of signal transduction (GO:0009966)	1
GO_Biological_Process_2018	protein deacylation (GO:0035601)	1
GO_Biological_Process_2018	negative regulation of lipid storage (GO:0010888)	1
GO_Biological_Process_2018	positive regulation of DNA-templated transcription, elongation (GO:0032786)	1
GO_Biological_Process_2018	membrane protein intracellular domain proteolysis (GO:0031293)	1
GO_Biological_Process_2018	protein deacetylation (GO:0006476)	1
GO_Biological_Process_2018	regulation of chromatin organization (GO:1902275)	1
GO_Biological_Process_2018	regulation of fatty acid beta-oxidation (GO:0031998)	1
GO_Biological_Process_2018	negative regulation of endoplasmic reticulum unfolded protein response (GO:1900102)	1
GO_Biological_Process_2018	negative regulation of response to cytokine stimulus (GO:0060761)	1
GO_Biological_Process_2018	regulation of myeloid leukocyte differentiation (GO:0002761)	1
GO_Biological_Process_2018	energy coupled proton transmembrane transport, against electrochemical gradient (GO:0015988)	1
GO_Biological_Process_2018	positive regulation of signal transduction (GO:0009967)	1
GO_Biological_Process_2018	cardiac myofibril assembly (GO:0055003)	1
GO_Biological_Process_2018	negative regulation of interleukin-8 production (GO:0032717)	1
GO_Biological_Process_2018	negative regulation of reactive oxygen species metabolic process (GO:2000378)	1
GO_Biological_Process_2018	phospholipid catabolic process (GO:0009395)	1
GO_Biological_Process_2018	positive regulation of natural killer cell mediated immunity (GO:0002717)	1
GO_Biological_Process_2018	regulation of phagocytosis (GO:0050764)	1
GO_Biological_Process_2018	positive regulation of cellular catabolic process (GO:0031331)	1
GO_Biological_Process_2018	mRNA stabilization (GO:0048255)	1
GO_Biological_Process_2018	positive regulation of catalytic activity (GO:0043085)	1
GO_Biological_Process_2018	regulation of protein import into nucleus (GO:0042306)	1
GO_Biological_Process_2018	response to organonitrogen compound (GO:0010243)	1
GO_Biological_Process_2018	regulation of actin filament depolymerization (GO:0030834)	1
GO_Biological_Process_2018	circulatory system development (GO:0072359)	1
GO_Biological_Process_2018	negative regulation of keratinocyte differentiation (GO:0045617)	1
GO_Biological_Process_2018	regulation of wound healing (GO:0061041)	1
GO_Biological_Process_2018	negative regulation of epidermal cell differentiation (GO:0045605)	1
GO_Biological_Process_2018	regulation of delayed rectifier potassium channel activity (GO:1902259)	1
GO_Biological_Process_2018	regulation of centrosome duplication (GO:0010824)	1
GO_Biological_Process_2018	negative regulation of cellular response to transforming growth factor beta stimulus (GO:1903845)	1
GO_Biological_Process_2018	negative regulation of transforming growth factor beta receptor signaling pathway (GO:0030512)	1
GO_Biological_Process_2018	regulation of coagulation (GO:0050818)	1
GO_Biological_Process_2018	cartilage development (GO:0051216)	1
GO_Biological_Process_2018	positive regulation of actin filament depolymerization (GO:0030836)	1
GO_Biological_Process_2018	response to peptide (GO:1901652)	1
GO_Biological_Process_2018	cellular macromolecular complex assembly (GO:0034622)	1
GO_Biological_Process_2018	sulfur amino acid metabolic process (GO:0000096)	1
GO_Biological_Process_2018	triglyceride catabolic process (GO:0019433)	1
GO_Biological_Process_2018	regulation of transforming growth factor beta receptor signaling pathway (GO:0017015)	1
GO_Biological_Process_2018	transition metal ion homeostasis (GO:0055076)	1
GO_Biological_Process_2018	regulation of TOR signaling (GO:0032006)	1
GO_Biological_Process_2018	in utero embryonic development (GO:0001701)	1
GO_Biological_Process_2018	positive regulation of Rho protein signal transduction (GO:0035025)	1
GO_Biological_Process_2018	positive regulation of wound healing (GO:0090303)	1
GO_Biological_Process_2018	vesicle-mediated transport (GO:0016192)	1
GO_Biological_Process_2018	chordate embryonic development (GO:0043009)	1
GO_Biological_Process_2018	odontogenesis (GO:0042476)	1
GO_Biological_Process_2018	atrioventricular valve morphogenesis (GO:0003181)	1
GO_Biological_Process_2018	skeletal system development (GO:0001501)	1
GO_Biological_Process_2018	cellular response to calcium ion (GO:0071277)	1
GO_Biological_Process_2018	chondrocyte differentiation (GO:0002062)	1
GO_Biological_Process_2018	regulation of glomerular filtration (GO:0003093)	1
GO_Biological_Process_2018	positive regulation of RNA binding (GO:1905216)	1
GO_Biological_Process_2018	regulation of hydrogen peroxide metabolic process (GO:0010310)	1
GO_Biological_Process_2018	choline catabolic process (GO:0042426)	1
GO_Biological_Process_2018	positive regulation of osteoblast proliferation (GO:0033690)	1
GO_Biological_Process_2018	embryonic skeletal joint morphogenesis (GO:0060272)	1
GO_Biological_Process_2018	forebrain regionalization (GO:0021871)	1
GO_Biological_Process_2018	regulation of aldosterone biosynthetic process (GO:0032347)	1
GO_Biological_Process_2018	regulation of cortisol biosynthetic process (GO:2000064)	1
GO_Biological_Process_2018	negative regulation of delayed rectifier potassium channel activity (GO:1902260)	1
GO_Biological_Process_2018	negative regulation of mononuclear cell migration (GO:0071676)	1
GO_Biological_Process_2018	odontogenesis of dentin-containing tooth (GO:0042475)	1
GO_Biological_Process_2018	negative regulation of transmembrane receptor protein serine/threonine kinase signaling pathway (GO:0090101)	1
GO_Biological_Process_2018	acylglycerol catabolic process (GO:0046464)	1
GO_Biological_Process_2018	cellular response to drug (GO:0035690)	1
GO_Biological_Process_2018	protein localization to lysosome (GO:0061462)	1
GO_Biological_Process_2018	regulation of blood coagulation (GO:0030193)	1
GO_Biological_Process_2018	positive regulation of blood vessel endothelial cell migration (GO:0043536)	1
GO_Biological_Process_2018	positive regulation of type I interferon production (GO:0032481)	1
GO_Biological_Process_2018	positive regulation of keratinocyte proliferation (GO:0010838)	1
GO_Biological_Process_2018	negative regulation of leukocyte migration (GO:0002686)	1
GO_Biological_Process_2018	oxygen transport (GO:0015671)	1
GO_Biological_Process_2018	heme catabolic process (GO:0042167)	1
GO_Biological_Process_2018	porphyrin-containing compound catabolic process (GO:0006787)	1
GO_Biological_Process_2018	pericardium morphogenesis (GO:0003344)	1
GO_Biological_Process_2018	positive regulation of mRNA binding (GO:1902416)	1
GO_Biological_Process_2018	myoblast fusion (GO:0007520)	1
GO_Biological_Process_2018	L-methionine salvage (GO:0071267)	1
GO_Biological_Process_2018	regulation of keratinocyte proliferation (GO:0010837)	1
GO_Biological_Process_2018	tRNA metabolic process (GO:0006399)	1
GO_Biological_Process_2018	negative regulation of fat cell differentiation (GO:0045599)	1
GO_Biological_Process_2018	protein targeting to lysosome (GO:0006622)	1
GO_Biological_Process_2018	endocardial cushion development (GO:0003197)	1
GO_Biological_Process_2018	antimicrobial humoral immune response mediated by antimicrobial peptide (GO:0061844)	1
GO_Biological_Process_2018	ventricular cardiac muscle cell membrane repolarization (GO:0099625)	1
GO_Biological_Process_2018	glycerolipid biosynthetic process (GO:0045017)	1
GO_Biological_Process_2018	negative regulation of voltage-gated potassium channel activity (GO:1903817)	1
GO_Biological_Process_2018	regulation of toll-like receptor 2 signaling pathway (GO:0034135)	1
GO_Biological_Process_2018	lung epithelium development (GO:0060428)	1
GO_Biological_Process_2018	cellular biogenic amine catabolic process (GO:0042402)	1
GO_Biological_Process_2018	regulation of autophagy (GO:0010506)	1
GO_Biological_Process_2018	positive regulation of angiogenesis (GO:0045766)	1
GO_Biological_Process_2018	positive regulation of muscle cell differentiation (GO:0051149)	1
GO_Biological_Process_2018	peptide metabolic process (GO:0006518)	1
GO_Biological_Process_2018	proteolysis (GO:0006508)	1
GO_Biological_Process_2018	mitochondrial electron transport, cytochrome c to oxygen (GO:0006123)	1
GO_Biological_Process_2018	regulation of nuclear division (GO:0051783)	1
GO_Biological_Process_2018	ventricular septum morphogenesis (GO:0060412)	1
GO_Biological_Process_2018	triglyceride metabolic process (GO:0006641)	1
GO_Biological_Process_2018	actin polymerization or depolymerization (GO:0008154)	1
GO_Biological_Process_2018	muscle cell differentiation (GO:0042692)	1
GO_Biological_Process_2018	type B pancreatic cell differentiation (GO:0003309)	1
GO_Biological_Process_2018	positive regulation of protein sumoylation (GO:0033235)	1
GO_Biological_Process_2018	pericardium development (GO:0060039)	1
GO_Biological_Process_2018	potassium ion export (GO:0071435)	1
GO_Biological_Process_2018	Notch signaling involved in heart development (GO:0061314)	1
GO_Biological_Process_2018	atrioventricular valve development (GO:0003171)	1
GO_Biological_Process_2018	B cell homeostasis (GO:0001782)	1
GO_Biological_Process_2018	regulation of dendrite development (GO:0050773)	1
GO_Biological_Process_2018	positive regulation of phosphatase activity (GO:0010922)	1
GO_Biological_Process_2018	cellular protein metabolic process (GO:0044267)	1
GO_Biological_Process_2018	regulation of fat cell differentiation (GO:0045598)	1
GO_Biological_Process_2018	gas transport (GO:0015669)	1
GO_Biological_Process_2018	positive regulation of bone remodeling (GO:0046852)	1
GO_Biological_Process_2018	regulation of respiratory burst (GO:0060263)	1
GO_Biological_Process_2018	base-excision repair, AP site formation (GO:0006285)	1
GO_Biological_Process_2018	positive regulation of cardiac muscle cell differentiation (GO:2000727)	1
GO_Biological_Process_2018	actin filament depolymerization (GO:0030042)	1
GO_Biological_Process_2018	nucleoside metabolic process (GO:0009116)	1
GO_Biological_Process_2018	insulin-like growth factor receptor signaling pathway (GO:0048009)	1
GO_Biological_Process_2018	intraciliary retrograde transport (GO:0035721)	1
GO_Biological_Process_2018	negative regulation of centrosome duplication (GO:0010826)	1
GO_Biological_Process_2018	positive regulation of bone resorption (GO:0045780)	1
GO_Biological_Process_2018	pulmonary valve development (GO:0003177)	1
GO_Biological_Process_2018	cytoplasmic sequestering of NF-kappaB (GO:0007253)	1
GO_Biological_Process_2018	cytosolic transport (GO:0016482)	1
GO_Biological_Process_2018	positive regulation of metabolic process (GO:0009893)	1
GO_Biological_Process_2018	embryonic camera-type eye development (GO:0031076)	1
GO_Biological_Process_2018	phosphatidylinositol biosynthetic process (GO:0006661)	1
GO_Biological_Process_2018	positive regulation of cellular protein localization (GO:1903829)	1
GO_Biological_Process_2018	regulation of cellular amine metabolic process (GO:0033238)	1
GO_Biological_Process_2018	regulation of cellular amino acid metabolic process (GO:0006521)	1
GO_Biological_Process_2018	regulation of microtubule-based movement (GO:0060632)	1
GO_Biological_Process_2018	positive regulation of ruffle assembly (GO:1900029)	1
GO_Biological_Process_2018	negative regulation of catabolic process (GO:0009895)	1
GO_Biological_Process_2018	histone deubiquitination (GO:0016578)	1
GO_Biological_Process_2018	Rho protein signal transduction (GO:0007266)	1
GO_Biological_Process_2018	negative regulation of axonogenesis (GO:0050771)	1
GO_Biological_Process_2018	microtubule polymerization or depolymerization (GO:0031109)	1
GO_Biological_Process_2018	cellular response to interleukin-15 (GO:0071350)	1
GO_Biological_Process_2018	interleukin-15-mediated signaling pathway (GO:0035723)	1
GO_Biological_Process_2018	retrograde transport, endosome to Golgi (GO:0042147)	1
GO_Biological_Process_2018	negative regulation of viral-induced cytoplasmic pattern recognition receptor signaling pathway (GO:0039532)	1
GO_Biological_Process_2018	establishment of spindle localization (GO:0051293)	1
GO_Biological_Process_2018	positive regulation of mRNA splicing, via spliceosome (GO:0048026)	1
GO_Biological_Process_2018	determination of digestive tract left/right asymmetry (GO:0071907)	1
GO_Biological_Process_2018	negative regulation of receptor internalization (GO:0002091)	1
GO_Biological_Process_2018	negative regulation of RIG-I signaling pathway (GO:0039536)	1
GO_Biological_Process_2018	fatty acid derivative biosynthetic process (GO:1901570)	1
GO_Biological_Process_2018	histone monoubiquitination (GO:0010390)	1
GO_Biological_Process_2018	anaphase-promoting complex-dependent catabolic process (GO:0031145)	1
GO_Biological_Process_2018	preassembly of GPI anchor in ER membrane (GO:0016254)	1
GO_Biological_Process_2018	negative regulation of ubiquitin-protein ligase activity involved in mitotic cell cycle (GO:0051436)	1
GO_Biological_Process_2018	long-chain fatty acid metabolic process (GO:0001676)	1
GO_Biological_Process_2018	positive regulation of transcription from RNA polymerase I promoter (GO:0045943)	1
GO_Biological_Process_2018	mesoderm development (GO:0007498)	1
GO_Biological_Process_2018	regulation of ubiquitin-protein ligase activity involved in mitotic cell cycle (GO:0051439)	1
GO_Biological_Process_2018	regulation of mRNA splicing, via spliceosome (GO:0048024)	1
GO_Biological_Process_2018	chromosome organization (GO:0051276)	1
GO_Biological_Process_2018	chloride transmembrane transport (GO:1902476)	1
GO_Biological_Process_2018	regulation of peptidyl-tyrosine phosphorylation (GO:0050730)	1
GO_Biological_Process_2018	sulfate transmembrane transport (GO:1902358)	1
GO_Biological_Process_2018	regulation of cellular localization (GO:0060341)	1
GO_Biological_Process_2018	cell-cell junction organization (GO:0045216)	1
GO_Biological_Process_2018	positive regulation of phosphatidylinositol 3-kinase signaling (GO:0014068)	1
GO_Biological_Process_2018	positive regulation of calcium ion import (GO:0090280)	1
GO_Biological_Process_2018	negative regulation of myeloid cell apoptotic process (GO:0033033)	1
GO_Biological_Process_2018	catecholamine metabolic process (GO:0006584)	1
GO_Biological_Process_2018	positive regulation of plasma membrane bounded cell projection assembly (GO:0120034)	1
GO_Biological_Process_2018	regulation of neurotransmitter transport (GO:0051588)	1
GO_Biological_Process_2018	chondroitin sulfate catabolic process (GO:0030207)	1
GO_Biological_Process_2018	positive regulation of supramolecular fiber organization (GO:1902905)	1
GO_Biological_Process_2018	cellular response to organic cyclic compound (GO:0071407)	1
GO_Biological_Process_2018	insulin receptor signaling pathway (GO:0008286)	1
GO_Biological_Process_2018	regulation of platelet-derived growth factor receptor-beta signaling pathway (GO:2000586)	1
GO_Biological_Process_2018	actin crosslink formation (GO:0051764)	1
GO_Biological_Process_2018	positive regulation of protein kinase A signaling (GO:0010739)	1
GO_Biological_Process_2018	cellular response to histamine (GO:0071420)	1
GO_Biological_Process_2018	positive regulation of interleukin-5 production (GO:0032754)	1
[truncated: 348 more rows]

## Sheet: GO Molecular Function
Database	Enriched term	Number of CTCs
GO_Molecular_Function_2018	olfactory receptor activity (GO:0004984)	9
GO_Molecular_Function_2018	RAGE receptor binding (GO:0050786)	9
GO_Molecular_Function_2018	protein channel activity (GO:0015266)	8
GO_Molecular_Function_2018	ATP binding (GO:0005524)	8
GO_Molecular_Function_2018	peptidyl-proline dioxygenase activity (GO:0031543)	8
GO_Molecular_Function_2018	ATPase binding (GO:0051117)	7
GO_Molecular_Function_2018	transition metal ion binding (GO:0046914)	7
GO_Molecular_Function_2018	zinc ion binding (GO:0008270)	7
GO_Molecular_Function_2018	aspartic-type peptidase activity (GO:0070001)	7
GO_Molecular_Function_2018	purine ribonucleoside triphosphate binding (GO:0035639)	6
GO_Molecular_Function_2018	frizzled binding (GO:0005109)	6
GO_Molecular_Function_2018	mitogen-activated protein kinase binding (GO:0051019)	6
GO_Molecular_Function_2018	CCR chemokine receptor binding (GO:0048020)	6
GO_Molecular_Function_2018	metal ion binding (GO:0046872)	6
GO_Molecular_Function_2018	ephrin receptor binding (GO:0046875)	6
GO_Molecular_Function_2018	histone methyltransferase activity (H3-K36 specific) (GO:0046975)	5
GO_Molecular_Function_2018	inositol trisphosphate kinase activity (GO:0051766)	5
GO_Molecular_Function_2018	serine-type endopeptidase inhibitor activity (GO:0004867)	5
GO_Molecular_Function_2018	peptidyl-proline 4-dioxygenase activity (GO:0031545)	5
GO_Molecular_Function_2018	ubiquitin conjugating enzyme activity (GO:0061631)	5
GO_Molecular_Function_2018	acyl-CoA ligase activity (GO:0003996)	5
GO_Molecular_Function_2018	calmodulin-dependent protein kinase activity (GO:0004683)	5
GO_Molecular_Function_2018	acyl-CoA hydrolase activity (GO:0047617)	4
GO_Molecular_Function_2018	calcium channel inhibitor activity (GO:0019855)	4
GO_Molecular_Function_2018	MHC class I receptor activity (GO:0032393)	4
GO_Molecular_Function_2018	adenyl ribonucleotide binding (GO:0032559)	4
GO_Molecular_Function_2018	ether hydrolase activity (GO:0016803)	4
GO_Molecular_Function_2018	chemokine activity (GO:0008009)	4
GO_Molecular_Function_2018	chemokine receptor binding (GO:0042379)	4
GO_Molecular_Function_2018	water transmembrane transporter activity (GO:0005372)	4
GO_Molecular_Function_2018	water channel activity (GO:0015250)	4
GO_Molecular_Function_2018	ubiquitin protein ligase binding (GO:0031625)	4
GO_Molecular_Function_2018	ubiquitin-like protein ligase binding (GO:0044389)	4
GO_Molecular_Function_2018	transcription coactivator activity (GO:0003713)	4
GO_Molecular_Function_2018	histone deacetylase activity (GO:0004407)	4
GO_Molecular_Function_2018	calcium-dependent cysteine-type endopeptidase activity (GO:0004198)	4
GO_Molecular_Function_2018	ubiquitin-like protein conjugating enzyme activity (GO:0061650)	4
GO_Molecular_Function_2018	protein deacetylase activity (GO:0033558)	4
GO_Molecular_Function_2018	RNA polymerase II transcription factor activity, sequence-specific transcription regulatory region DNA binding (GO:0001133)	4
GO_Molecular_Function_2018	primary amine oxidase activity (GO:0008131)	4
GO_Molecular_Function_2018	calcium ion binding (GO:0005509)	4
GO_Molecular_Function_2018	fatty-acyl-CoA synthase activity (GO:0004321)	4
GO_Molecular_Function_2018	O-acyltransferase activity (GO:0008374)	4
GO_Molecular_Function_2018	vasopressin receptor activity (GO:0005000)	4
GO_Molecular_Function_2018	methylation-dependent protein binding (GO:0140034)	4
GO_Molecular_Function_2018	ATPase activity, coupled to transmembrane movement of substances (GO:0042626)	4
GO_Molecular_Function_2018	P-P-bond-hydrolysis-driven transmembrane transporter activity (GO:0015405)	4
GO_Molecular_Function_2018	RNA stem-loop binding (GO:0035613)	4
GO_Molecular_Function_2018	aspartic-type endopeptidase activity (GO:0004190)	4
GO_Molecular_Function_2018	phospholipase A2 activity (GO:0004623)	4
GO_Molecular_Function_2018	SH3/SH2 adaptor activity (GO:0005070)	4
GO_Molecular_Function_2018	phosphatidylcholine transporter activity (GO:0008525)	4
GO_Molecular_Function_2018	complement receptor activity (GO:0004875)	3
GO_Molecular_Function_2018	sterol esterase activity (GO:0004771)	3
GO_Molecular_Function_2018	retinoic acid receptor binding (GO:0042974)	3
GO_Molecular_Function_2018	syntaxin binding (GO:0019905)	3
GO_Molecular_Function_2018	calcium channel regulator activity (GO:0005246)	3
GO_Molecular_Function_2018	calcium-dependent phospholipid binding (GO:0005544)	3
GO_Molecular_Function_2018	ion channel inhibitor activity (GO:0008200)	3
GO_Molecular_Function_2018	tropomyosin binding (GO:0005523)	3
GO_Molecular_Function_2018	phosphofructokinase activity (GO:0008443)	3
GO_Molecular_Function_2018	protein heterodimerization activity (GO:0046982)	3
GO_Molecular_Function_2018	tRNA (guanine) methyltransferase activity (GO:0016423)	3
GO_Molecular_Function_2018	MHC class II protein binding (GO:0042289)	3
GO_Molecular_Function_2018	adenyl nucleotide binding (GO:0030554)	3
GO_Molecular_Function_2018	adenyl-nucleotide exchange factor activity (GO:0000774)	3
GO_Molecular_Function_2018	adenylyltransferase activity (GO:0070566)	3
GO_Molecular_Function_2018	histone methyltransferase activity (H3-K4 specific) (GO:0042800)	3
GO_Molecular_Function_2018	endopeptidase inhibitor activity (GO:0004866)	3
GO_Molecular_Function_2018	ion antiporter activity (GO:0099516)	3
GO_Molecular_Function_2018	ribonuclease activity (GO:0004540)	3
GO_Molecular_Function_2018	C-acyltransferase activity (GO:0016408)	3
GO_Molecular_Function_2018	arylsulfatase activity (GO:0004065)	3
GO_Molecular_Function_2018	sulfuric ester hydrolase activity (GO:0008484)	3
GO_Molecular_Function_2018	ligand-dependent nuclear receptor transcription coactivator activity (GO:0030374)	3
GO_Molecular_Function_2018	nuclease activity (GO:0004518)	3
GO_Molecular_Function_2018	voltage-gated cation channel activity (GO:0022843)	3
GO_Molecular_Function_2018	cholesterol binding (GO:0015485)	3
GO_Molecular_Function_2018	voltage-gated calcium channel activity (GO:0005245)	3
GO_Molecular_Function_2018	immunoglobulin binding (GO:0019865)	3
GO_Molecular_Function_2018	core promoter sequence-specific DNA binding (GO:0001046)	3
GO_Molecular_Function_2018	high voltage-gated calcium channel activity (GO:0008331)	3
GO_Molecular_Function_2018	leak channel activity (GO:0022840)	3
GO_Molecular_Function_2018	potassium ion leak channel activity (GO:0022841)	3
GO_Molecular_Function_2018	methylated histone binding (GO:0035064)	3
GO_Molecular_Function_2018	endonuclease activity (GO:0004519)	3
GO_Molecular_Function_2018	[heparan sulfate]-glucosamine 3-sulfotransferase 1 activity (GO:0008467)	3
GO_Molecular_Function_2018	histone-lysine N-methyltransferase activity (GO:0018024)	3
GO_Molecular_Function_2018	ATPase activity, coupled to movement of substances (GO:0043492)	3
GO_Molecular_Function_2018	G-protein coupled peptide receptor activity (GO:0008528)	3
GO_Molecular_Function_2018	oxidoreductase activity, acting on single donors with incorporation of molecular oxygen, incorporation of two atoms of oxygen (GO:0016702)	3
GO_Molecular_Function_2018	G-protein beta/gamma-subunit complex binding (GO:0031683)	3
GO_Molecular_Function_2018	palmitoyl-CoA hydrolase activity (GO:0016290)	3
GO_Molecular_Function_2018	calcium-dependent phospholipase A2 activity (GO:0047498)	3
GO_Molecular_Function_2018	ADP-ribosylation factor binding (GO:0030306)	3
GO_Molecular_Function_2018	purinergic receptor activity (GO:0035586)	3
GO_Molecular_Function_2018	extracellular ATP-gated cation channel activity (GO:0004931)	3
GO_Molecular_Function_2018	ATP-gated ion channel activity (GO:0035381)	3
GO_Molecular_Function_2018	nucleotide receptor activity (GO:0016502)	3
GO_Molecular_Function_2018	WW domain binding (GO:0050699)	3
GO_Molecular_Function_2018	phosphatidylinositol transporter activity (GO:0008526)	3
GO_Molecular_Function_2018	GTPase regulator activity (GO:0030695)	3
GO_Molecular_Function_2018	inorganic cation transmembrane transporter activity (GO:0022890)	3
GO_Molecular_Function_2018	RNA binding (GO:0003723)	3
GO_Molecular_Function_2018	GTPase activator activity (GO:0005096)	3
GO_Molecular_Function_2018	Rab GTPase binding (GO:0017137)	3
GO_Molecular_Function_2018	Ras GTPase binding (GO:0017016)	3
GO_Molecular_Function_2018	anion:anion antiporter activity (GO:0015301)	3
GO_Molecular_Function_2018	phosphatidylinositol 3-kinase regulator activity (GO:0035014)	3
GO_Molecular_Function_2018	telomerase RNA binding (GO:0070034)	3
GO_Molecular_Function_2018	hydrolase activity, acting on acid anhydrides, catalyzing transmembrane movement of substances (GO:0016820)	3
GO_Molecular_Function_2018	oxidoreductase activity, oxidizing metal ions, NAD or NADP as acceptor (GO:0016723)	3
GO_Molecular_Function_2018	G-rich strand telomeric DNA binding (GO:0098505)	3
GO_Molecular_Function_2018	actin filament binding (GO:0051015)	2
GO_Molecular_Function_2018	CoA hydrolase activity (GO:0016289)	2
GO_Molecular_Function_2018	protein kinase A regulatory subunit binding (GO:0034237)	2
GO_Molecular_Function_2018	sequence-specific DNA binding (GO:0043565)	2
GO_Molecular_Function_2018	intronic transcription regulatory region sequence-specific DNA binding (GO:0001161)	2
GO_Molecular_Function_2018	NADP-retinol dehydrogenase activity (GO:0052650)	2
GO_Molecular_Function_2018	RNA polymerase II core binding (GO:0000993)	2
GO_Molecular_Function_2018	basal RNA polymerase II transcription machinery binding (GO:0001099)	2
GO_Molecular_Function_2018	potassium ion binding (GO:0030955)	2
GO_Molecular_Function_2018	sodium ion transmembrane transporter activity (GO:0015081)	2
GO_Molecular_Function_2018	prenyltransferase activity (GO:0004659)	2
GO_Molecular_Function_2018	alkali metal ion binding (GO:0031420)	2
GO_Molecular_Function_2018	sodium ion binding (GO:0031402)	2
GO_Molecular_Function_2018	protein serine/threonine kinase activator activity (GO:0043539)	2
GO_Molecular_Function_2018	ATPase regulator activity (GO:0060590)	2
GO_Molecular_Function_2018	chloride channel inhibitor activity (GO:0019869)	2
GO_Molecular_Function_2018	protein homodimerization activity (GO:0042803)	2
GO_Molecular_Function_2018	calcium-dependent protein serine/threonine kinase activity (GO:0009931)	2
GO_Molecular_Function_2018	bitter taste receptor activity (GO:0033038)	2
GO_Molecular_Function_2018	salt transmembrane transporter activity (GO:1901702)	2
GO_Molecular_Function_2018	urate transmembrane transporter activity (GO:0015143)	2
GO_Molecular_Function_2018	cysteine-type endopeptidase inhibitor activity (GO:0004869)	2
GO_Molecular_Function_2018	protease binding (GO:0002020)	2
GO_Molecular_Function_2018	taste receptor activity (GO:0008527)	2
GO_Molecular_Function_2018	inorganic anion transmembrane transporter activity (GO:0015103)	2
GO_Molecular_Function_2018	organic acid transmembrane transporter activity (GO:0005342)	2
GO_Molecular_Function_2018	inorganic anion exchanger activity (GO:0005452)	2
GO_Molecular_Function_2018	sodium-independent organic anion transmembrane transporter activity (GO:0015347)	2
GO_Molecular_Function_2018	pre-mRNA binding (GO:0036002)	2
GO_Molecular_Function_2018	CARD domain binding (GO:0050700)	2
GO_Molecular_Function_2018	caspase binding (GO:0089720)	2
GO_Molecular_Function_2018	sterol binding (GO:0032934)	2
GO_Molecular_Function_2018	cation:amino acid symporter activity (GO:0005416)	2
GO_Molecular_Function_2018	carbonate dehydratase activity (GO:0004089)	2
GO_Molecular_Function_2018	neuropeptide binding (GO:0042923)	2
GO_Molecular_Function_2018	organic anion transmembrane transporter activity (GO:0008514)	2
GO_Molecular_Function_2018	galanin receptor activity (GO:0004966)	2
GO_Molecular_Function_2018	bicarbonate transmembrane transporter activity (GO:0015106)	2
GO_Molecular_Function_2018	ligand-gated sodium channel activity (GO:0015280)	2
GO_Molecular_Function_2018	amide transmembrane transporter activity (GO:0042887)	2
GO_Molecular_Function_2018	MHC protein complex binding (GO:0023023)	2
GO_Molecular_Function_2018	deoxyribonuclease activity (GO:0004536)	2
GO_Molecular_Function_2018	endodeoxyribonuclease activity (GO:0004520)	2
GO_Molecular_Function_2018	CoA-ligase activity (GO:0016405)	2
GO_Molecular_Function_2018	protein-lysine N-methyltransferase activity (GO:0016279)	2
GO_Molecular_Function_2018	LBD domain binding (GO:0050693)	2
GO_Molecular_Function_2018	2-acylglycerol-3-phosphate O-acyltransferase activity (GO:0047144)	2
GO_Molecular_Function_2018	intramolecular oxidoreductase activity, transposing S-S bonds (GO:0016864)	2
GO_Molecular_Function_2018	protein disulfide isomerase activity (GO:0003756)	2
GO_Molecular_Function_2018	tau-protein kinase activity (GO:0050321)	2
GO_Molecular_Function_2018	poly(G) binding (GO:0034046)	2
GO_Molecular_Function_2018	lysine N-methyltransferase activity (GO:0016278)	2
GO_Molecular_Function_2018	heparan sulfate sulfotransferase activity (GO:0034483)	2
GO_Molecular_Function_2018	fatty acid ligase activity (GO:0015645)	2
GO_Molecular_Function_2018	sodium:potassium-exchanging ATPase activity (GO:0005391)	2
GO_Molecular_Function_2018	potassium-transporting ATPase activity (GO:0008556)	2
GO_Molecular_Function_2018	G-protein coupled chemoattractant receptor activity (GO:0001637)	2
GO_Molecular_Function_2018	G-protein coupled receptor binding (GO:0001664)	2
GO_Molecular_Function_2018	nitric-oxide synthase binding (GO:0050998)	2
GO_Molecular_Function_2018	cAMP-dependent protein kinase regulator activity (GO:0008603)	2
GO_Molecular_Function_2018	histone serine kinase activity (GO:0035174)	2
GO_Molecular_Function_2018	channel activity (GO:0015267)	2
GO_Molecular_Function_2018	ATPase activator activity (GO:0001671)	2
GO_Molecular_Function_2018	armadillo repeat domain binding (GO:0070016)	2
GO_Molecular_Function_2018	MHC class II protein complex binding (GO:0023026)	2
GO_Molecular_Function_2018	SUMO transferase activity (GO:0019789)	2
GO_Molecular_Function_2018	DNA-directed 5'-3' RNA polymerase activity (GO:0003899)	2
GO_Molecular_Function_2018	phosphatidylcholine-sterol O-acyltransferase activator activity (GO:0060228)	2
GO_Molecular_Function_2018	Ral GTPase binding (GO:0017160)	2
GO_Molecular_Function_2018	ubiquitin-like protein ligase activity (GO:0061659)	2
GO_Molecular_Function_2018	sequence-specific double-stranded DNA binding (GO:1990837)	2
GO_Molecular_Function_2018	RNA polymerase II regulatory region sequence-specific DNA binding (GO:0000977)	2
GO_Molecular_Function_2018	ammonium transmembrane transporter activity (GO:0008519)	2
GO_Molecular_Function_2018	dicarboxylic acid transmembrane transporter activity (GO:0005310)	2
GO_Molecular_Function_2018	ubiquitin protein ligase activity (GO:0061630)	2
GO_Molecular_Function_2018	phosphatidylcholine 1-acylhydrolase activity (GO:0008970)	2
GO_Molecular_Function_2018	lysophospholipase activity (GO:0004622)	2
GO_Molecular_Function_2018	interleukin-17 receptor activity (GO:0030368)	2
GO_Molecular_Function_2018	chitinase activity (GO:0004568)	2
GO_Molecular_Function_2018	kinesin binding (GO:0019894)	2
GO_Molecular_Function_2018	protein transmembrane transporter activity (GO:0008320)	2
GO_Molecular_Function_2018	peptidoglycan binding (GO:0042834)	2
GO_Molecular_Function_2018	RNA polymerase III activity (GO:0001056)	2
GO_Molecular_Function_2018	single-stranded DNA exodeoxyribonuclease activity (GO:0008297)	2
GO_Molecular_Function_2018	crossover junction endodeoxyribonuclease activity (GO:0008821)	2
GO_Molecular_Function_2018	guanylate kinase activity (GO:0004385)	2
GO_Molecular_Function_2018	double-stranded RNA binding (GO:0003725)	2
GO_Molecular_Function_2018	endoribonuclease activity (GO:0004521)	2
GO_Molecular_Function_2018	G-protein activated inward rectifier potassium channel activity (GO:0015467)	2
GO_Molecular_Function_2018	lipase activator activity (GO:0060229)	2
GO_Molecular_Function_2018	O-methyltransferase activity (GO:0008171)	2
GO_Molecular_Function_2018	sulfate transmembrane transporter activity (GO:0015116)	2
GO_Molecular_Function_2018	protein transporter activity (GO:0008565)	2
GO_Molecular_Function_2018	protein kinase A catalytic subunit binding (GO:0034236)	2
GO_Molecular_Function_2018	hydrogen ion transmembrane transporter activity (GO:0015078)	2
GO_Molecular_Function_2018	cAMP-dependent protein kinase inhibitor activity (GO:0004862)	2
GO_Molecular_Function_2018	single-stranded telomeric DNA binding (GO:0043047)	2
GO_Molecular_Function_2018	ephrin receptor activity (GO:0005003)	2
GO_Molecular_Function_2018	transmembrane-ephrin receptor activity (GO:0005005)	2
GO_Molecular_Function_2018	inward rectifier potassium channel activity (GO:0005242)	2
GO_Molecular_Function_2018	carboxylic ester hydrolase activity (GO:0052689)	2
GO_Molecular_Function_2018	G-protein coupled neurotransmitter receptor activity (GO:0099528)	2
GO_Molecular_Function_2018	G-protein coupled acetylcholine receptor activity (GO:0016907)	2
GO_Molecular_Function_2018	dopamine transmembrane transporter activity (GO:0005329)	2
GO_Molecular_Function_2018	monoamine transmembrane transporter activity (GO:0008504)	2
GO_Molecular_Function_2018	aryl sulfotransferase activity (GO:0004062)	2
GO_Molecular_Function_2018	telomeric DNA binding (GO:0042162)	2
GO_Molecular_Function_2018	mRNA 3'-UTR binding (GO:0003730)	2
GO_Molecular_Function_2018	phosphatidylinositol-3,4,5-trisphosphate binding (GO:0005547)	1
GO_Molecular_Function_2018	SH2 domain binding (GO:0042169)	1
GO_Molecular_Function_2018	adenylate cyclase binding (GO:0008179)	1
GO_Molecular_Function_2018	prostaglandin receptor activity (GO:0004955)	1
GO_Molecular_Function_2018	protein phosphatase binding (GO:0019903)	1
GO_Molecular_Function_2018	calcium activated cation channel activity (GO:0005227)	1
GO_Molecular_Function_2018	DNA ligase activity (GO:0003909)	1
GO_Molecular_Function_2018	type II transforming growth factor beta receptor binding (GO:0005114)	1
GO_Molecular_Function_2018	ion gated channel activity (GO:0022839)	1
GO_Molecular_Function_2018	protein phosphatase activator activity (GO:0072542)	1
GO_Molecular_Function_2018	3-chloroallyl aldehyde dehydrogenase activity (GO:0004028)	1
GO_Molecular_Function_2018	protein phosphatase 2A binding (GO:0051721)	1
GO_Molecular_Function_2018	titin binding (GO:0031432)	1
GO_Molecular_Function_2018	cytokine activity (GO:0005125)	1
GO_Molecular_Function_2018	retinoic acid binding (GO:0001972)	1
GO_Molecular_Function_2018	intermediate filament binding (GO:0019215)	1
GO_Molecular_Function_2018	poly-pyrimidine tract binding (GO:0008187)	1
GO_Molecular_Function_2018	protein serine/threonine/tyrosine kinase activity (GO:0004712)	1
GO_Molecular_Function_2018	retinoid binding (GO:0005501)	1
GO_Molecular_Function_2018	1-phosphatidylinositol-4-phosphate 5-kinase activity (GO:0016308)	1
GO_Molecular_Function_2018	phospholipase activator activity (GO:0016004)	1
GO_Molecular_Function_2018	chromo shadow domain binding (GO:0070087)	1
GO_Molecular_Function_2018	phosphatidylinositol phosphate kinase activity (GO:0016307)	1
GO_Molecular_Function_2018	protein kinase activator activity (GO:0030295)	1
GO_Molecular_Function_2018	neutral amino acid transmembrane transporter activity (GO:0015175)	1
GO_Molecular_Function_2018	sodium:amino acid symporter activity (GO:0005283)	1
GO_Molecular_Function_2018	secondary active transmembrane transporter activity (GO:0015291)	1
GO_Molecular_Function_2018	anion transmembrane transporter activity (GO:0008509)	1
GO_Molecular_Function_2018	alanine transmembrane transporter activity (GO:0022858)	1
GO_Molecular_Function_2018	L-proline transmembrane transporter activity (GO:0015193)	1
GO_Molecular_Function_2018	L-alanine transmembrane transporter activity (GO:0015180)	1
GO_Molecular_Function_2018	NEDD8-specific protease activity (GO:0019784)	1
GO_Molecular_Function_2018	amino acid transmembrane transporter activity (GO:0015171)	1
GO_Molecular_Function_2018	L-amino acid transmembrane transporter activity (GO:0015179)	1
GO_Molecular_Function_2018	dipeptidyl-peptidase activity (GO:0008239)	1
GO_Molecular_Function_2018	anion:cation symporter activity (GO:0015296)	1
GO_Molecular_Function_2018	cysteine-type endopeptidase activity (GO:0004197)	1
GO_Molecular_Function_2018	double-stranded DNA binding (GO:0003690)	1
GO_Molecular_Function_2018	cysteine-type peptidase activity (GO:0008234)	1
GO_Molecular_Function_2018	RNA polymerase II repressing transcription factor binding (GO:0001103)	1
GO_Molecular_Function_2018	metalloendopeptidase activity (GO:0004222)	1
GO_Molecular_Function_2018	activin-activated receptor activity (GO:0017002)	1
GO_Molecular_Function_2018	glycine transmembrane transporter activity (GO:0015187)	1
GO_Molecular_Function_2018	antiporter activity (GO:0015297)	1
GO_Molecular_Function_2018	N-acyltransferase activity (GO:0016410)	1
GO_Molecular_Function_2018	actinin binding (GO:0042805)	1
GO_Molecular_Function_2018	core promoter proximal region sequence-specific DNA binding (GO:0000987)	1
GO_Molecular_Function_2018	growth factor activity (GO:0008083)	1
GO_Molecular_Function_2018	intracellular calcium activated chloride channel activity (GO:0005229)	1
GO_Molecular_Function_2018	intracellular chloride channel activity (GO:0061778)	1
GO_Molecular_Function_2018	ubiquitin-like protein conjugating enzyme binding (GO:0044390)	1
GO_Molecular_Function_2018	neuropeptide receptor activity (GO:0008188)	1
GO_Molecular_Function_2018	GABA-A receptor activity (GO:0004890)	1
GO_Molecular_Function_2018	RNA polymerase II core promoter sequence-specific DNA binding (GO:0000979)	1
GO_Molecular_Function_2018	GABA receptor activity (GO:0016917)	1
GO_Molecular_Function_2018	semaphorin receptor activity (GO:0017154)	1
GO_Molecular_Function_2018	Lys63-specific deubiquitinase activity (GO:0061578)	1
GO_Molecular_Function_2018	acylglycerol O-acyltransferase activity (GO:0016411)	1
GO_Molecular_Function_2018	1-acylglycerol-3-phosphate O-acyltransferase activity (GO:0003841)	1
GO_Molecular_Function_2018	G-protein coupled photoreceptor activity (GO:0008020)	1
GO_Molecular_Function_2018	lysophosphatidic acid acyltransferase activity (GO:0042171)	1
GO_Molecular_Function_2018	death receptor activity (GO:0005035)	1
GO_Molecular_Function_2018	tumor necrosis factor-activated receptor activity (GO:0005031)	1
GO_Molecular_Function_2018	ATPase coupled ion transmembrane transporter activity (GO:0042625)	1
GO_Molecular_Function_2018	Lys48-specific deubiquitinase activity (GO:1990380)	1
GO_Molecular_Function_2018	benzodiazepine receptor activity (GO:0008503)	1
GO_Molecular_Function_2018	transcription factor activity, RNA polymerase II core promoter proximal region sequence-specific binding (GO:0000982)	1
GO_Molecular_Function_2018	protein methyltransferase activity (GO:0008276)	1
GO_Molecular_Function_2018	transcriptional activator activity, RNA polymerase II transcription regulatory region sequence-specific binding (GO:0001228)	1
GO_Molecular_Function_2018	calcium channel activity (GO:0005262)	1
GO_Molecular_Function_2018	pre-mRNA 3'-splice site binding (GO:0030628)	1
GO_Molecular_Function_2018	GDP-dissociation inhibitor activity (GO:0005092)	1
GO_Molecular_Function_2018	phosphatidylinositol-3,5-bisphosphate phosphatase activity (GO:0106018)	1
GO_Molecular_Function_2018	microfilament motor activity (GO:0000146)	1
GO_Molecular_Function_2018	O-acetyltransferase activity (GO:0016413)	1
GO_Molecular_Function_2018	hyalurononglucosaminidase activity (GO:0004415)	1
GO_Molecular_Function_2018	histone methyltransferase activity (GO:0042054)	1
GO_Molecular_Function_2018	substrate-specific channel activity (GO:0022838)	1
GO_Molecular_Function_2018	SUMO-specific protease activity (GO:0016929)	1
GO_Molecular_Function_2018	vascular endothelial growth factor-activated receptor activity (GO:0005021)	1
GO_Molecular_Function_2018	transcriptional repressor activity, RNA polymerase II activating transcription factor binding (GO:0098811)	1
GO_Molecular_Function_2018	kinase inhibitor activity (GO:0019210)	1
GO_Molecular_Function_2018	organic acid:sodium symporter activity (GO:0005343)	1
GO_Molecular_Function_2018	transforming growth factor beta binding (GO:0050431)	1
GO_Molecular_Function_2018	histone kinase activity (GO:0035173)	1
GO_Molecular_Function_2018	MHC class II receptor activity (GO:0032395)	1
GO_Molecular_Function_2018	DNA polymerase binding (GO:0070182)	1
GO_Molecular_Function_2018	ATPase activity (GO:0016887)	1
GO_Molecular_Function_2018	MHC class I protein binding (GO:0042288)	1
GO_Molecular_Function_2018	nucleoside-triphosphatase activity (GO:0017111)	1
GO_Molecular_Function_2018	ATPase activity, coupled (GO:0042623)	1
GO_Molecular_Function_2018	cholesterol transporter activity (GO:0017127)	1
GO_Molecular_Function_2018	motor activity (GO:0003774)	1
GO_Molecular_Function_2018	U6 snRNA binding (GO:0017070)	1
GO_Molecular_Function_2018	transcription regulatory region sequence-specific DNA binding (GO:0000976)	1
GO_Molecular_Function_2018	transcriptional activator activity, RNA polymerase II distal enhancer sequence-specific binding (GO:0001205)	1
GO_Molecular_Function_2018	alpha-sialidase activity (GO:0016997)	1
GO_Molecular_Function_2018	exo-alpha-sialidase activity (GO:0004308)	1
GO_Molecular_Function_2018	retinoid X receptor binding (GO:0046965)	1
GO_Molecular_Function_2018	complement component C1q binding (GO:0001849)	1
GO_Molecular_Function_2018	RNA polymerase II transcription corepressor activity (GO:0001106)	1
GO_Molecular_Function_2018	MHC protein binding (GO:0042287)	1
GO_Molecular_Function_2018	RNA polymerase II regulatory region DNA binding (GO:0001012)	1
GO_Molecular_Function_2018	divalent inorganic cation transmembrane transporter activity (GO:0072509)	1
GO_Molecular_Function_2018	polyubiquitin modification-dependent protein binding (GO:0031593)	1
GO_Molecular_Function_2018	C4-dicarboxylate transmembrane transporter activity (GO:0015556)	1
GO_Molecular_Function_2018	lipoprotein particle receptor binding (GO:0070325)	1
GO_Molecular_Function_2018	single-stranded DNA binding (GO:0003697)	1
GO_Molecular_Function_2018	zinc ion transmembrane transporter activity (GO:0005385)	1
GO_Molecular_Function_2018	hydrolase activity, acting on carbon-nitrogen (but not peptide) bonds, in linear amides (GO:0016811)	1
GO_Molecular_Function_2018	calcium-dependent protein serine/threonine phosphatase activity (GO:0004723)	1
GO_Molecular_Function_2018	tRNA methyltransferase activity (GO:0008175)	1
GO_Molecular_Function_2018	sequence-specific mRNA binding (GO:1990825)	1
GO_Molecular_Function_2018	transcriptional repressor activity, RNA polymerase II core promoter proximal region sequence-specific binding (GO:0001078)	1
GO_Molecular_Function_2018	peptidase activity, acting on L-amino acid peptides (GO:0070011)	1
GO_Molecular_Function_2018	protein serine/threonine kinase activity (GO:0004674)	1
GO_Molecular_Function_2018	GABA receptor binding (GO:0050811)	1
GO_Molecular_Function_2018	oxidoreductase activity, acting on paired donors, with incorporation or reduction of molecular oxygen, 2-oxoglutarate as one donor, and incorporation of one atom each of oxygen into both donors (GO:0016706)	1
GO_Molecular_Function_2018	muscle alpha-actinin binding (GO:0051371)	1
GO_Molecular_Function_2018	DNA secondary structure binding (GO:0000217)	1
GO_Molecular_Function_2018	microtubule minus-end binding (GO:0051011)	1
GO_Molecular_Function_2018	calcium ion transmembrane transporter activity (GO:0015085)	1
GO_Molecular_Function_2018	phosphoprotein phosphatase activity (GO:0004721)	1
GO_Molecular_Function_2018	arylesterase activity (GO:0004064)	1
GO_Molecular_Function_2018	hydro-lyase activity (GO:0016836)	1
GO_Molecular_Function_2018	sulfurtransferase activity (GO:0016783)	1
GO_Molecular_Function_2018	phosphatidylinositol binding (GO:0035091)	1
GO_Molecular_Function_2018	glutathione transferase activity (GO:0004364)	1
GO_Molecular_Function_2018	lipoprotein transporter activity (GO:0042954)	1
GO_Molecular_Function_2018	proton-transporting ATPase activity, rotational mechanism (GO:0046961)	1
GO_Molecular_Function_2018	Arp2/3 complex binding (GO:0071933)	1
GO_Molecular_Function_2018	transcriptional repressor activity, RNA polymerase II transcription regulatory region sequence-specific binding (GO:0001227)	1
GO_Molecular_Function_2018	voltage-gated potassium channel activity involved in ventricular cardiac muscle cell action potential repolarization (GO:1902282)	1
GO_Molecular_Function_2018	hydrogen-exporting ATPase activity (GO:0036442)	1
GO_Molecular_Function_2018	ribonuclease P activity (GO:0004526)	1
GO_Molecular_Function_2018	hydrogen-exporting ATPase activity, phosphorylative mechanism (GO:0008553)	1
GO_Molecular_Function_2018	superoxide-generating NADPH oxidase activator activity (GO:0016176)	1
GO_Molecular_Function_2018	DNA N-glycosylase activity (GO:0019104)	1
GO_Molecular_Function_2018	NADPH binding (GO:0070402)	1
GO_Molecular_Function_2018	dipeptidase activity (GO:0016805)	1
GO_Molecular_Function_2018	histone deacetylase binding (GO:0042826)	1
GO_Molecular_Function_2018	cytochrome-b5 reductase activity, acting on NAD(P)H (GO:0004128)	1
GO_Molecular_Function_2018	dynein complex binding (GO:0070840)	1
GO_Molecular_Function_2018	single-stranded RNA binding (GO:0003727)	1
GO_Molecular_Function_2018	ionotropic glutamate receptor binding (GO:0035255)	1
GO_Molecular_Function_2018	beta-tubulin binding (GO:0048487)	1
GO_Molecular_Function_2018	N-acetylglucosamine 6-O-sulfotransferase activity (GO:0001517)	1
GO_Molecular_Function_2018	tubulin binding (GO:0015631)	1
GO_Molecular_Function_2018	ion transmembrane transporter activity (GO:0015075)	1
GO_Molecular_Function_2018	Rac GTPase binding (GO:0048365)	1
GO_Molecular_Function_2018	RNA helicase activity (GO:0003724)	1
GO_Molecular_Function_2018	ATP-dependent RNA helicase activity (GO:0004004)	1
GO_Molecular_Function_2018	RNA-dependent ATPase activity (GO:0008186)	1
GO_Molecular_Function_2018	ligand-gated ion channel activity (GO:0015276)	1
GO_Molecular_Function_2018	phosphatidylinositol phosphate binding (GO:1901981)	1
GO_Molecular_Function_2018	chloride transmembrane transporter activity (GO:0015108)	1
GO_Molecular_Function_2018	oxalate transmembrane transporter activity (GO:0019531)	1
GO_Molecular_Function_2018	chloride channel activity (GO:0005254)	1
GO_Molecular_Function_2018	hydrogen:amino acid symporter activity (GO:0005280)	1
GO_Molecular_Function_2018	monovalent inorganic cation transmembrane transporter activity (GO:0015077)	1
GO_Molecular_Function_2018	carboxylic acid transmembrane transporter activity (GO:0046943)	1
GO_Molecular_Function_2018	RNA polymerase II activity (GO:0001055)	1
GO_Molecular_Function_2018	anion channel activity (GO:0005253)	1
GO_Molecular_Function_2018	actin binding (GO:0003779)	1
GO_Molecular_Function_2018	ATP-dependent microtubule motor activity (GO:1990939)	1
GO_Molecular_Function_2018	inhibitory extracellular ligand-gated ion channel activity (GO:0005237)	1
GO_Molecular_Function_2018	ligand-gated anion channel activity (GO:0099095)	1
GO_Molecular_Function_2018	calcium-dependent protein kinase activity (GO:0010857)	1
GO_Molecular_Function_2018	ankyrin binding (GO:0030506)	1
GO_Molecular_Function_2018	small GTPase binding (GO:0031267)	1
GO_Molecular_Function_2018	pseudouridine synthase activity (GO:0009982)	1
GO_Molecular_Function_2018	lipoprotein particle binding (GO:0071813)	1
GO_Molecular_Function_2018	voltage-gated ion channel activity involved in regulation of postsynaptic membrane potential (GO:1905030)	1
GO_Molecular_Function_2018	voltage-gated sodium channel activity (GO:0005248)	1
GO_Molecular_Function_2018	sterol transporter activity (GO:0015248)	1
GO_Molecular_Function_2018	ATPase activity, coupled to transmembrane movement of ions, rotational mechanism (GO:0044769)	1
GO_Molecular_Function_2018	glucosyltransferase activity (GO:0046527)	1
GO_Molecular_Function_2018	cysteine-type endopeptidase activity involved in execution phase of apoptosis (GO:0097200)	1
GO_Molecular_Function_2018	excitatory extracellular ligand-gated ion channel activity (GO:0005231)	1
GO_Molecular_Function_2018	ubiquitin-protein transferase activity (GO:0004842)	1
GO_Molecular_Function_2018	protein serine/threonine kinase inhibitor activity (GO:0030291)	1
GO_Molecular_Function_2018	interleukin-1 receptor binding (GO:0005149)	1
GO_Molecular_Function_2018	sulfotransferase activity (GO:0008146)	1
GO_Molecular_Function_2018	hyaluronic acid binding (GO:0005540)	1
GO_Molecular_Function_2018	core promoter binding (GO:0001047)	1
GO_Molecular_Function_2018	myosin binding (GO:0017022)	1
GO_Molecular_Function_2018	transcriptional activator activity, RNA polymerase II core promoter proximal region sequence-specific binding (GO:0001077)	1
GO_Molecular_Function_2018	ATP-dependent helicase activity (GO:0008026)	1
GO_Molecular_Function_2018	serotonin receptor activity (GO:0099589)	1
GO_Molecular_Function_2018	G-protein coupled serotonin receptor activity (GO:0004993)	1
GO_Molecular_Function_2018	mRNA 5'-UTR binding (GO:0048027)	1
GO_Molecular_Function_2018	glycine binding (GO:0016594)	1
GO_Molecular_Function_2018	RNA polymerase II core promoter proximal region sequence-specific DNA binding (GO:0000978)	1
GO_Molecular_Function_2018	potassium:proton antiporter activity (GO:0015386)	1
GO_Molecular_Function_2018	phospholipid-translocating ATPase activity (GO:0004012)	1
GO_Molecular_Function_2018	natural killer cell lectin-like receptor binding (GO:0046703)	1
GO_Molecular_Function_2018	neurotrophin binding (GO:0043121)	1
GO_Molecular_Function_2018	glucose:sodium symporter activity (GO:0005412)	1
GO_Molecular_Function_2018	glucose transmembrane transporter activity (GO:0005355)	1
GO_Molecular_Function_2018	macromolecule transmembrane transporter activity (GO:0022884)	1
GO_Molecular_Function_2018	peptide transmembrane transporter activity (GO:1904680)	1
GO_Molecular_Function_2018	phosphotransferase activity, phosphate group as acceptor (GO:0016776)	1
GO_Molecular_Function_2018	phospholipase activity (GO:0004620)	1
GO_Molecular_Function_2018	aldo-keto reductase (NADP) activity (GO:0004033)	1
GO_Molecular_Function_2018	transmembrane receptor protein tyrosine phosphatase activity (GO:0005001)	1
GO_Molecular_Function_2018	transmembrane receptor protein phosphatase activity (GO:0019198)	1
GO_Molecular_Function_2018	hydrolase activity, acting on carbon-nitrogen (but not peptide) bonds, in linear amidines (GO:0016813)	1
GO_Molecular_Function_2018	GTPase binding (GO:0051020)	1
GO_Molecular_Function_2018	protein tyrosine phosphatase activity (GO:0004725)	1
GO_Molecular_Function_2018	flap endonuclease activity (GO:0048256)	1
GO_Molecular_Function_2018	acid-thiol ligase activity (GO:0016878)	1
GO_Molecular_Function_2018	leucine zipper domain binding (GO:0043522)	1
GO_Molecular_Function_2018	histone acetyltransferase activity (GO:0004402)	1
GO_Molecular_Function_2018	peptide-lysine-N-acetyltransferase activity (GO:0061733)	1
GO_Molecular_Function_2018	phosphate ion binding (GO:0042301)	1
GO_Molecular_Function_2018	LRR domain binding (GO:0030275)	1
GO_Molecular_Function_2018	copper ion binding (GO:0005507)	1
GO_Molecular_Function_2018	3'-5'-exodeoxyribonuclease activity (GO:0008296)	1
GO_Molecular_Function_2018	JUN kinase binding (GO:0008432)	1
GO_Molecular_Function_2018	aldehyde dehydrogenase [NAD(P)+] activity (GO:0004030)	1
GO_Molecular_Function_2018	endodeoxyribonuclease activity, producing 3'-phosphomonoesters (GO:0016889)	1
GO_Molecular_Function_2018	NADH dehydrogenase activity (GO:0003954)	1
GO_Molecular_Function_2018	NAADP-sensitive calcium-release channel activity (GO:0072345)	1
GO_Molecular_Function_2018	endodeoxyribonuclease activity, producing 5'-phosphomonoesters (GO:0016888)	1
GO_Molecular_Function_2018	GTP-Rho binding (GO:0017049)	1

## Sheet: GO Cellular Component
Database	Enriched term	Number of CTCs
GO_Cellular_Component_2018	pseudopodium (GO:0031143)	9
GO_Cellular_Component_2018	spindle midzone (GO:0051233)	7
GO_Cellular_Component_2018	telomerase holoenzyme complex (GO:0005697)	7
GO_Cellular_Component_2018	condensed chromosome kinetochore (GO:0000777)	6
GO_Cellular_Component_2018	ficolin-1-rich granule membrane (GO:0101003)	5
GO_Cellular_Component_2018	tertiary granule (GO:0070820)	5
GO_Cellular_Component_2018	platelet alpha granule lumen (GO:0031093)	5
GO_Cellular_Component_2018	platelet alpha granule (GO:0031091)	5
GO_Cellular_Component_2018	myofibril (GO:0030016)	5
GO_Cellular_Component_2018	nuclear transcription factor complex (GO:0044798)	5
GO_Cellular_Component_2018	integral component of mitochondrial membrane (GO:0032592)	5
GO_Cellular_Component_2018	intrinsic component of the cytoplasmic side of the plasma membrane (GO:0031235)	5
GO_Cellular_Component_2018	perinuclear region of cytoplasm (GO:0048471)	5
GO_Cellular_Component_2018	cytoskeleton (GO:0005856)	5
GO_Cellular_Component_2018	microtubule minus-end (GO:0036449)	4
GO_Cellular_Component_2018	MLL1/2 complex (GO:0044665)	4
GO_Cellular_Component_2018	MLL1 complex (GO:0071339)	4
GO_Cellular_Component_2018	STAGA complex (GO:0030914)	4
GO_Cellular_Component_2018	kinesin complex (GO:0005871)	4
GO_Cellular_Component_2018	DNA-directed RNA polymerase complex (GO:0000428)	4
GO_Cellular_Component_2018	manchette (GO:0002177)	4
GO_Cellular_Component_2018	cation channel complex (GO:0034703)	3
GO_Cellular_Component_2018	mitotic spindle midzone (GO:1990023)	3
GO_Cellular_Component_2018	node of Ranvier (GO:0033268)	3
GO_Cellular_Component_2018	U2-type prespliceosome (GO:0071004)	3
GO_Cellular_Component_2018	striated muscle thin filament (GO:0005865)	3
GO_Cellular_Component_2018	axon initial segment (GO:0043194)	3
GO_Cellular_Component_2018	polymeric cytoskeletal fiber (GO:0099513)	3
GO_Cellular_Component_2018	intermediate filament cytoskeleton (GO:0045111)	3
GO_Cellular_Component_2018	nuclear inclusion body (GO:0042405)	3
GO_Cellular_Component_2018	AIM2 inflammasome complex (GO:0097169)	3
GO_Cellular_Component_2018	IPAF inflammasome complex (GO:0072557)	3
GO_Cellular_Component_2018	NLRP3 inflammasome complex (GO:0072559)	3
GO_Cellular_Component_2018	main axon (GO:0044304)	3
GO_Cellular_Component_2018	lipid droplet (GO:0005811)	3
GO_Cellular_Component_2018	L-type voltage-gated calcium channel complex (GO:1990454)	3
GO_Cellular_Component_2018	AMPA glutamate receptor complex (GO:0032281)	3
GO_Cellular_Component_2018	gamma-secretase complex (GO:0070765)	3
GO_Cellular_Component_2018	actin filament (GO:0005884)	3
GO_Cellular_Component_2018	T cell receptor complex (GO:0042101)	3
GO_Cellular_Component_2018	integral component of nuclear inner membrane (GO:0005639)	3
GO_Cellular_Component_2018	actin cytoskeleton (GO:0015629)	3
GO_Cellular_Component_2018	U1 snRNP (GO:0005685)	2
GO_Cellular_Component_2018	Golgi stack (GO:0005795)	2
GO_Cellular_Component_2018	membrane raft (GO:0045121)	2
GO_Cellular_Component_2018	actomyosin (GO:0042641)	2
GO_Cellular_Component_2018	spectrin-associated cytoskeleton (GO:0014731)	2
GO_Cellular_Component_2018	Ino80 complex (GO:0031011)	2
GO_Cellular_Component_2018	intercalated disc (GO:0014704)	2
GO_Cellular_Component_2018	intermediate filament (GO:0005882)	2
GO_Cellular_Component_2018	keratin filament (GO:0045095)	2
GO_Cellular_Component_2018	nuclear DNA-directed RNA polymerase complex (GO:0055029)	2
GO_Cellular_Component_2018	early phagosome (GO:0032009)	2
GO_Cellular_Component_2018	nuclear nucleosome (GO:0000788)	2
GO_Cellular_Component_2018	microtubule cytoskeleton (GO:0015630)	2
GO_Cellular_Component_2018	RNA polymerase II transcription factor complex (GO:0090575)	2
GO_Cellular_Component_2018	condensed chromosome, centromeric region (GO:0000779)	2
GO_Cellular_Component_2018	catenin complex (GO:0016342)	2
GO_Cellular_Component_2018	signal recognition particle (GO:0048500)	2
GO_Cellular_Component_2018	spherical high-density lipoprotein particle (GO:0034366)	2
GO_Cellular_Component_2018	contractile fiber (GO:0043292)	2
GO_Cellular_Component_2018	early endosome membrane (GO:0031901)	2
GO_Cellular_Component_2018	early endosome (GO:0005769)	2
GO_Cellular_Component_2018	P granule (GO:0043186)	2
GO_Cellular_Component_2018	Cul4-RING E3 ubiquitin ligase complex (GO:0080008)	2
GO_Cellular_Component_2018	cytoplasmic ribonucleoprotein granule (GO:0036464)	2
GO_Cellular_Component_2018	intrinsic component of mitochondrial inner membrane (GO:0031304)	2
GO_Cellular_Component_2018	nuclear body (GO:0016604)	2
GO_Cellular_Component_2018	integral component of mitochondrial inner membrane (GO:0031305)	2
GO_Cellular_Component_2018	actin cortical patch (GO:0030479)	2
GO_Cellular_Component_2018	endocytic patch (GO:0061645)	2
GO_Cellular_Component_2018	nuclear telomere cap complex (GO:0000783)	2
GO_Cellular_Component_2018	septin cytoskeleton (GO:0032156)	2
GO_Cellular_Component_2018	septin ring (GO:0005940)	2
GO_Cellular_Component_2018	septin filament array (GO:0032160)	2
GO_Cellular_Component_2018	autophagosome (GO:0005776)	2
GO_Cellular_Component_2018	autophagosome membrane (GO:0000421)	2
GO_Cellular_Component_2018	nuclear speck (GO:0016607)	2
GO_Cellular_Component_2018	microtubule end (GO:1990752)	1
GO_Cellular_Component_2018	precatalytic spliceosome (GO:0071011)	1
GO_Cellular_Component_2018	U4 snRNP (GO:0005687)	1
GO_Cellular_Component_2018	methylosome (GO:0034709)	1
GO_Cellular_Component_2018	mitotic spindle pole (GO:0097431)	1
GO_Cellular_Component_2018	ionotropic glutamate receptor complex (GO:0008328)	1
GO_Cellular_Component_2018	commitment complex (GO:0000243)	1
GO_Cellular_Component_2018	centrosome (GO:0005813)	1
GO_Cellular_Component_2018	endoplasmic reticulum-Golgi intermediate compartment membrane (GO:0033116)	1
GO_Cellular_Component_2018	polysome (GO:0005844)	1
GO_Cellular_Component_2018	SWI/SNF complex (GO:0016514)	1
GO_Cellular_Component_2018	npBAF complex (GO:0071564)	1
GO_Cellular_Component_2018	integral component of plasma membrane (GO:0005887)	1
GO_Cellular_Component_2018	mRNA cleavage and polyadenylation specificity factor complex (GO:0005847)	1
GO_Cellular_Component_2018	endoribonuclease complex (GO:1902555)	1
GO_Cellular_Component_2018	mitochondrial inner membrane presequence translocase complex (GO:0005744)	1
GO_Cellular_Component_2018	platelet dense granule (GO:0042827)	1
GO_Cellular_Component_2018	anchored component of external side of plasma membrane (GO:0031362)	1
GO_Cellular_Component_2018	HAUS complex (GO:0070652)	1
GO_Cellular_Component_2018	GABA-A receptor complex (GO:1902711)	1
GO_Cellular_Component_2018	ATP-binding cassette (ABC) transporter complex (GO:0043190)	1
GO_Cellular_Component_2018	Golgi lumen (GO:0005796)	1
GO_Cellular_Component_2018	messenger ribonucleoprotein complex (GO:1990124)	1
GO_Cellular_Component_2018	spindle pole centrosome (GO:0031616)	1
GO_Cellular_Component_2018	axonal growth cone (GO:0044295)	1
GO_Cellular_Component_2018	endoplasmic reticulum quality control compartment (GO:0044322)	1
GO_Cellular_Component_2018	MLL3/4 complex (GO:0044666)	1
GO_Cellular_Component_2018	insulin-responsive compartment (GO:0032593)	1
GO_Cellular_Component_2018	INO80-type complex (GO:0097346)	1
GO_Cellular_Component_2018	condensed nuclear chromosome, centromeric region (GO:0000780)	1
GO_Cellular_Component_2018	ficolin-1-rich granule (GO:0101002)	1
GO_Cellular_Component_2018	MHC protein complex (GO:0042611)	1
GO_Cellular_Component_2018	MHC class II protein complex (GO:0042613)	1
GO_Cellular_Component_2018	ER to Golgi transport vesicle membrane (GO:0012507)	1
GO_Cellular_Component_2018	integral component of lumenal side of endoplasmic reticulum membrane (GO:0071556)	1
GO_Cellular_Component_2018	COPII-coated ER to Golgi transport vesicle (GO:0030134)	1
GO_Cellular_Component_2018	integral component of endoplasmic reticulum membrane (GO:0030176)	1
GO_Cellular_Component_2018	mitochondrial small ribosomal subunit (GO:0005763)	1
GO_Cellular_Component_2018	recycling endosome (GO:0055037)	1
GO_Cellular_Component_2018	recycling endosome membrane (GO:0055038)	1
GO_Cellular_Component_2018	trans-Golgi network (GO:0005802)	1
GO_Cellular_Component_2018	micro-ribonucleoprotein complex (GO:0035068)	1
GO_Cellular_Component_2018	DNA-directed RNA polymerase II, holoenzyme (GO:0016591)	1
GO_Cellular_Component_2018	nucleoplasm part (GO:0044451)	1
GO_Cellular_Component_2018	U4/U6 x U5 tri-snRNP complex (GO:0046540)	1
GO_Cellular_Component_2018	small ribosomal subunit (GO:0015935)	1
GO_Cellular_Component_2018	sarcoplasmic reticulum (GO:0016529)	1
GO_Cellular_Component_2018	clathrin-coated endocytic vesicle membrane (GO:0030669)	1
GO_Cellular_Component_2018	condensed nuclear chromosome kinetochore (GO:0000778)	1
GO_Cellular_Component_2018	clathrin-coated endocytic vesicle (GO:0045334)	1
GO_Cellular_Component_2018	primary lysosome (GO:0005766)	1
GO_Cellular_Component_2018	H3 histone acetyltransferase complex (GO:0070775)	1
GO_Cellular_Component_2018	MOZ/MORF histone acetyltransferase complex (GO:0070776)	1
GO_Cellular_Component_2018	smooth endoplasmic reticulum (GO:0005790)	1
GO_Cellular_Component_2018	COPII vesicle coat (GO:0030127)	1
GO_Cellular_Component_2018	germ plasm (GO:0060293)	1
GO_Cellular_Component_2018	Set1C/COMPASS complex (GO:0048188)	1
GO_Cellular_Component_2018	secretory granule lumen (GO:0034774)	1
GO_Cellular_Component_2018	Cdc73/Paf1 complex (GO:0016593)	1
GO_Cellular_Component_2018	specific granule lumen (GO:0035580)	1
GO_Cellular_Component_2018	mitochondrial outer membrane translocase complex (GO:0005742)	1
GO_Cellular_Component_2018	calcium channel complex (GO:0034704)	1
GO_Cellular_Component_2018	DNA-directed RNA polymerase III complex (GO:0005666)	1
GO_Cellular_Component_2018	endosomal part (GO:0044440)	1
GO_Cellular_Component_2018	endoplasmic reticulum exit site (GO:0070971)	1
GO_Cellular_Component_2018	phagocytic vesicle membrane (GO:0030670)	1
GO_Cellular_Component_2018	alpha DNA polymerase:primase complex (GO:0005658)	1
GO_Cellular_Component_2018	vacuolar proton-transporting V-type ATPase complex (GO:0016471)	1
GO_Cellular_Component_2018	extrinsic component of endosome membrane (GO:0031313)	1
GO_Cellular_Component_2018	phagocytic vesicle (GO:0045335)	1
GO_Cellular_Component_2018	lysosome (GO:0005764)	1
GO_Cellular_Component_2018	junctional sarcoplasmic reticulum membrane (GO:0014701)	1
GO_Cellular_Component_2018	SCF ubiquitin ligase complex (GO:0019005)	1
GO_Cellular_Component_2018	signal recognition particle, endoplasmic reticulum targeting (GO:0005786)	1
GO_Cellular_Component_2018	nuclear ubiquitin ligase complex (GO:0000152)	1
GO_Cellular_Component_2018	spindle microtubule (GO:0005876)	1
GO_Cellular_Component_2018	microtubule (GO:0005874)	1
GO_Cellular_Component_2018	lateral element (GO:0000800)	1
GO_Cellular_Component_2018	brush border membrane (GO:0031526)	1
GO_Cellular_Component_2018	nuclear chromosome (GO:0000228)	1
GO_Cellular_Component_2018	bicellular tight junction (GO:0005923)	1
GO_Cellular_Component_2018	transcription factor TFTC complex (GO:0033276)	1
GO_Cellular_Component_2018	coated vesicle (GO:0030135)	1
GO_Cellular_Component_2018	cytoplasmic vesicle membrane (GO:0030659)	1
GO_Cellular_Component_2018	nucleolus (GO:0005730)	1
GO_Cellular_Component_2018	microvillus membrane (GO:0031528)	1
GO_Cellular_Component_2018	lytic vacuole membrane (GO:0098852)	1
GO_Cellular_Component_2018	axon (GO:0030424)	1
GO_Cellular_Component_2018	proton-transporting V-type ATPase complex (GO:0033176)	1
GO_Cellular_Component_2018	vacuole (GO:0005773)	1
GO_Cellular_Component_2018	microvillus (GO:0005902)	1
GO_Cellular_Component_2018	MICOS complex (GO:0061617)	1
GO_Cellular_Component_2018	AP-3 adaptor complex (GO:0030123)	1
GO_Cellular_Component_2018	cell cortex part (GO:0044448)	1
GO_Cellular_Component_2018	myosin filament (GO:0032982)	1
GO_Cellular_Component_2018	PML body (GO:0016605)	1
GO_Cellular_Component_2018	juxtaparanode region of axon (GO:0044224)	1
GO_Cellular_Component_2018	endoplasmic reticulum lumen (GO:0005788)	1
GO_Cellular_Component_2018	core mediator complex (GO:0070847)	1
GO_Cellular_Component_2018	nuclear origin of replication recognition complex (GO:0005664)	1
GO_Cellular_Component_2018	multivesicular body lumen (GO:0097486)	1
GO_Cellular_Component_2018	pi-body (GO:0071546)	1
GO_Cellular_Component_2018	mitochondrial large ribosomal subunit (GO:0005762)	1

## Sheet: GO Biological Process
Database	Enriched term	Number of CTCs
GO_Biological_Process_2018	positive regulation of transforming growth factor beta production (GO:0071636)	14
GO_Biological_Process_2018	regulation of transforming growth factor beta production (GO:0071634)	13
GO_Biological_Process_2018	cellular response to copper ion (GO:0071280)	12
GO_Biological_Process_2018	cellular response to zinc ion (GO:0071294)	12
GO_Biological_Process_2018	response to copper ion (GO:0046688)	12
GO_Biological_Process_2018	response to zinc ion (GO:0010043)	12
GO_Biological_Process_2018	cellular response to cadmium ion (GO:0071276)	12
GO_Biological_Process_2018	zinc ion homeostasis (GO:0055069)	12
GO_Biological_Process_2018	cellular zinc ion homeostasis (GO:0006882)	12
GO_Biological_Process_2018	response to cadmium ion (GO:0046686)	12
GO_Biological_Process_2018	negative regulation of complement activation (GO:0045916)	12
GO_Biological_Process_2018	sensory perception of smell (GO:0007608)	11
GO_Biological_Process_2018	regulation of response to external stimulus (GO:0032101)	11
GO_Biological_Process_2018	cellular divalent inorganic cation homeostasis (GO:0072503)	10
GO_Biological_Process_2018	sensory perception of chemical stimulus (GO:0007606)	10
GO_Biological_Process_2018	regulation of inflammatory response (GO:0050727)	10
GO_Biological_Process_2018	extracellular matrix disassembly (GO:0022617)	10
GO_Biological_Process_2018	cellular transition metal ion homeostasis (GO:0046916)	9
GO_Biological_Process_2018	positive regulation of ATPase activity (GO:0032781)	9
GO_Biological_Process_2018	skeletal muscle contraction (GO:0003009)	9
GO_Biological_Process_2018	cellular response to metal ion (GO:0071248)	9
GO_Biological_Process_2018	keratinocyte differentiation (GO:0030216)	9
GO_Biological_Process_2018	peptide cross-linking (GO:0018149)	9
GO_Biological_Process_2018	epidermal cell differentiation (GO:0009913)	9
GO_Biological_Process_2018	skin development (GO:0043588)	9
GO_Biological_Process_2018	regulation of defense response (GO:0031347)	8
GO_Biological_Process_2018	positive regulation of cytolysis (GO:0045919)	8
GO_Biological_Process_2018	positive regulation of immune system process (GO:0002684)	8
GO_Biological_Process_2018	cellular metal ion homeostasis (GO:0006875)	8
GO_Biological_Process_2018	cholesterol metabolic process (GO:0008203)	8
GO_Biological_Process_2018	positive regulation of immune response (GO:0050778)	8
GO_Biological_Process_2018	neutrophil migration (GO:1990266)	8
GO_Biological_Process_2018	response to interleukin-1 (GO:0070555)	8
GO_Biological_Process_2018	positive regulation of potassium ion transmembrane transport (GO:1901381)	8
GO_Biological_Process_2018	negative regulation of B cell proliferation (GO:0030889)	8
GO_Biological_Process_2018	positive regulation of type 2 immune response (GO:0002830)	8
GO_Biological_Process_2018	epidermis development (GO:0008544)	8
GO_Biological_Process_2018	lipoxygenase pathway (GO:0019372)	8
GO_Biological_Process_2018	regulation of water loss via skin (GO:0033561)	8
GO_Biological_Process_2018	establishment of skin barrier (GO:0061436)	8
GO_Biological_Process_2018	regulation of interleukin-18 production (GO:0032661)	7
GO_Biological_Process_2018	positive regulation of CD4-positive, alpha-beta T cell activation (GO:2000516)	7
GO_Biological_Process_2018	negative regulation of peptidase activity (GO:0010466)	7
GO_Biological_Process_2018	amyloid precursor protein metabolic process (GO:0042982)	7
GO_Biological_Process_2018	regulation of endopeptidase activity (GO:0052548)	7
GO_Biological_Process_2018	negative regulation of endopeptidase activity (GO:0010951)	7
GO_Biological_Process_2018	negative regulation of cytokine production involved in immune response (GO:0002719)	7
GO_Biological_Process_2018	hematopoietic progenitor cell differentiation (GO:0002244)	7
GO_Biological_Process_2018	inactivation of MAPK activity (GO:0000188)	7
GO_Biological_Process_2018	neutrophil chemotaxis (GO:0030593)	7
GO_Biological_Process_2018	granulocyte chemotaxis (GO:0071621)	7
GO_Biological_Process_2018	response to tumor necrosis factor (GO:0034612)	7
GO_Biological_Process_2018	positive regulation of hydrolase activity (GO:0051345)	7
GO_Biological_Process_2018	synaptic vesicle recycling (GO:0036465)	7
GO_Biological_Process_2018	unsaturated fatty acid biosynthetic process (GO:0006636)	7
GO_Biological_Process_2018	icosanoid metabolic process (GO:0006690)	7
GO_Biological_Process_2018	negative regulation of immune response (GO:0050777)	6
GO_Biological_Process_2018	inflammatory response (GO:0006954)	6
GO_Biological_Process_2018	regulation of regulatory T cell differentiation (GO:0045589)	6
GO_Biological_Process_2018	divalent metal ion transport (GO:0070838)	6
GO_Biological_Process_2018	lens fiber cell development (GO:0070307)	6
GO_Biological_Process_2018	positive regulation of potassium ion transmembrane transporter activity (GO:1901018)	6
GO_Biological_Process_2018	gas homeostasis (GO:0033483)	6
GO_Biological_Process_2018	regulation of AMPA receptor activity (GO:2000311)	6
GO_Biological_Process_2018	sarcomere organization (GO:0045214)	6
GO_Biological_Process_2018	water transport (GO:0006833)	6
GO_Biological_Process_2018	negative regulation of hydrolase activity (GO:0051346)	6
GO_Biological_Process_2018	monocyte chemotaxis (GO:0002548)	6
GO_Biological_Process_2018	positive regulation of ERK1 and ERK2 cascade (GO:0070374)	6
GO_Biological_Process_2018	protein homotrimerization (GO:0070207)	6
GO_Biological_Process_2018	regulation of leukocyte migration (GO:0002685)	6
GO_Biological_Process_2018	striated muscle contraction (GO:0006941)	6
GO_Biological_Process_2018	cholesterol biosynthetic process (GO:0006695)	6
GO_Biological_Process_2018	secondary alcohol biosynthetic process (GO:1902653)	6
GO_Biological_Process_2018	positive regulation of MAPK cascade (GO:0043410)	6
GO_Biological_Process_2018	protein transmembrane import into intracellular organelle (GO:0044743)	6
GO_Biological_Process_2018	cellular protein modification process (GO:0006464)	6
GO_Biological_Process_2018	outer mitochondrial membrane organization (GO:0007008)	6
GO_Biological_Process_2018	regulation of organelle organization (GO:0033043)	6
GO_Biological_Process_2018	regulation of nucleic acid-templated transcription (GO:1903506)	5
GO_Biological_Process_2018	regulation of cellular macromolecule biosynthetic process (GO:2000112)	5
GO_Biological_Process_2018	regulation of gene expression (GO:0010468)	5
GO_Biological_Process_2018	regulation of endothelial cell proliferation (GO:0001936)	5
GO_Biological_Process_2018	protein complex assembly (GO:0006461)	5
GO_Biological_Process_2018	COPII vesicle coating (GO:0048208)	5
GO_Biological_Process_2018	vesicle targeting, rough ER to cis-Golgi (GO:0048207)	5
GO_Biological_Process_2018	vesicle coating (GO:0006901)	5
GO_Biological_Process_2018	negative regulation of immune system process (GO:0002683)	5
GO_Biological_Process_2018	regulation of cardiac conduction (GO:1903779)	5
GO_Biological_Process_2018	negative regulation of inflammatory response (GO:0050728)	5
GO_Biological_Process_2018	response to prostaglandin E (GO:0034695)	5
GO_Biological_Process_2018	positive regulation of regulatory T cell differentiation (GO:0045591)	5
GO_Biological_Process_2018	calcium ion transport (GO:0006816)	5
GO_Biological_Process_2018	myelination (GO:0042552)	5
GO_Biological_Process_2018	response to metal ion (GO:0010038)	5
GO_Biological_Process_2018	regulation of mRNA 3'-end processing (GO:0031440)	5
GO_Biological_Process_2018	negative regulation of NF-kappaB transcription factor activity (GO:0032088)	5
GO_Biological_Process_2018	regulation of immunoglobulin mediated immune response (GO:0002889)	5
GO_Biological_Process_2018	peptidyl-proline hydroxylation (GO:0019511)	5
GO_Biological_Process_2018	cellular response to retinoic acid (GO:0071300)	5
GO_Biological_Process_2018	regulation of nitric-oxide synthase activity (GO:0050999)	5
GO_Biological_Process_2018	positive regulation of isomerase activity (GO:0010912)	5
GO_Biological_Process_2018	negative regulation of growth (GO:0045926)	5
GO_Biological_Process_2018	positive regulation of ERAD pathway (GO:1904294)	5
GO_Biological_Process_2018	negative regulation of sequence-specific DNA binding transcription factor activity (GO:0043433)	5
GO_Biological_Process_2018	regulation of ATPase activity (GO:0043462)	5
GO_Biological_Process_2018	vesicle organization (GO:0016050)	5
GO_Biological_Process_2018	eosinophil chemotaxis (GO:0048245)	5
GO_Biological_Process_2018	eosinophil migration (GO:0072677)	5
GO_Biological_Process_2018	lymphocyte chemotaxis (GO:0048247)	5
GO_Biological_Process_2018	response to interferon-gamma (GO:0034341)	5
GO_Biological_Process_2018	positive regulation of GTPase activity (GO:0043547)	5
GO_Biological_Process_2018	regulation of GTPase activity (GO:0043087)	5
GO_Biological_Process_2018	cellular response to interferon-gamma (GO:0071346)	5
GO_Biological_Process_2018	myeloid leukocyte differentiation (GO:0002573)	5
GO_Biological_Process_2018	positive regulation of interleukin-1 beta production (GO:0032731)	5
GO_Biological_Process_2018	regulation of ERK1 and ERK2 cascade (GO:0070372)	5
GO_Biological_Process_2018	positive regulation of defense response (GO:0031349)	5
GO_Biological_Process_2018	sterol biosynthetic process (GO:0016126)	5
GO_Biological_Process_2018	peptidyl-lysine dimethylation (GO:0018027)	5
GO_Biological_Process_2018	negative regulation of acute inflammatory response (GO:0002674)	5
GO_Biological_Process_2018	positive regulation of humoral immune response (GO:0002922)	5
GO_Biological_Process_2018	oxygen homeostasis (GO:0032364)	5
GO_Biological_Process_2018	regulation of B cell proliferation (GO:0030888)	5
GO_Biological_Process_2018	G-protein coupled acetylcholine receptor signaling pathway (GO:0007213)	5
GO_Biological_Process_2018	regulation of immunoglobulin production (GO:0002637)	5
GO_Biological_Process_2018	regulation of chromosome organization (GO:0033044)	5
GO_Biological_Process_2018	calcium ion import into cytosol (GO:1902656)	5
GO_Biological_Process_2018	calcium ion import across plasma membrane (GO:0098703)	5
GO_Biological_Process_2018	long-chain fatty acid biosynthetic process (GO:0042759)	5
GO_Biological_Process_2018	regulation of glutamate receptor signaling pathway (GO:1900449)	5
GO_Biological_Process_2018	muscle contraction (GO:0006936)	5
GO_Biological_Process_2018	ephrin receptor signaling pathway (GO:0048013)	5
GO_Biological_Process_2018	unsaturated fatty acid metabolic process (GO:0033559)	5
GO_Biological_Process_2018	vesicle fusion (GO:0006906)	5
GO_Biological_Process_2018	protein transport (GO:0015031)	5
GO_Biological_Process_2018	regulation of transcription, DNA-templated (GO:0006355)	4
GO_Biological_Process_2018	COPII-coated vesicle budding (GO:0090114)	4
GO_Biological_Process_2018	regulation of cholesterol transport (GO:0032374)	4
GO_Biological_Process_2018	cellular response to prostaglandin E stimulus (GO:0071380)	4
GO_Biological_Process_2018	regulation of neuron apoptotic process (GO:0043523)	4
GO_Biological_Process_2018	cellular response to prostaglandin stimulus (GO:0071379)	4
GO_Biological_Process_2018	negative regulation of defense response (GO:0031348)	4
GO_Biological_Process_2018	regulation of heart contraction (GO:0008016)	4
GO_Biological_Process_2018	regulation of G-protein coupled receptor protein signaling pathway (GO:0008277)	4
GO_Biological_Process_2018	immune response-inhibiting cell surface receptor signaling pathway (GO:0002767)	4
GO_Biological_Process_2018	midbrain dopaminergic neuron differentiation (GO:1904948)	4
GO_Biological_Process_2018	negative regulation of response to external stimulus (GO:0032102)	4
GO_Biological_Process_2018	striated muscle tissue development (GO:0014706)	4
GO_Biological_Process_2018	actomyosin structure organization (GO:0031032)	4
GO_Biological_Process_2018	release of sequestered calcium ion into cytosol by endoplasmic reticulum (GO:1903514)	4
GO_Biological_Process_2018	negative regulation of T cell mediated immunity (GO:0002710)	4
GO_Biological_Process_2018	cofactor biosynthetic process (GO:0051188)	4
GO_Biological_Process_2018	regulation of spindle assembly (GO:0090169)	4
GO_Biological_Process_2018	positive regulation of interleukin-1 beta secretion (GO:0050718)	4
GO_Biological_Process_2018	negative regulation of calcium ion transport (GO:0051926)	4
GO_Biological_Process_2018	regulation of dopamine receptor signaling pathway (GO:0060159)	4
GO_Biological_Process_2018	peptidyl-lysine monomethylation (GO:0018026)	4
GO_Biological_Process_2018	regulation of blood vessel diameter (GO:0097746)	4
GO_Biological_Process_2018	organelle membrane fusion (GO:0090174)	4
GO_Biological_Process_2018	chemokine-mediated signaling pathway (GO:0070098)	4
GO_Biological_Process_2018	regulation of natural killer cell chemotaxis (GO:2000501)	4
GO_Biological_Process_2018	calcium ion homeostasis (GO:0055074)	4
GO_Biological_Process_2018	cellular response to tumor necrosis factor (GO:0071356)	4
GO_Biological_Process_2018	cellular response to cytokine stimulus (GO:0071345)	4
GO_Biological_Process_2018	cellular response to interleukin-1 (GO:0071347)	4
GO_Biological_Process_2018	response to nitric oxide (GO:0071731)	4
GO_Biological_Process_2018	negative regulation of secretion by cell (GO:1903531)	4
GO_Biological_Process_2018	histone lysine methylation (GO:0034968)	4
GO_Biological_Process_2018	ATP synthesis coupled electron transport (GO:0042773)	4
GO_Biological_Process_2018	positive regulation of inflammatory response (GO:0050729)	4
GO_Biological_Process_2018	fluid transport (GO:0042044)	4
GO_Biological_Process_2018	creatine metabolic process (GO:0006600)	4
GO_Biological_Process_2018	protein prenylation (GO:0018342)	4
GO_Biological_Process_2018	galactosylceramide metabolic process (GO:0006681)	4
GO_Biological_Process_2018	T-helper 17 cell lineage commitment (GO:0072540)	4
GO_Biological_Process_2018	cardiac muscle contraction (GO:0060048)	4
GO_Biological_Process_2018	protein localization to membrane (GO:0072657)	4
GO_Biological_Process_2018	relaxation of cardiac muscle (GO:0055119)	4
GO_Biological_Process_2018	stress granule assembly (GO:0034063)	4
GO_Biological_Process_2018	negative regulation of cardiac muscle hypertrophy (GO:0010614)	4
GO_Biological_Process_2018	myeloid cell activation involved in immune response (GO:0002275)	4
GO_Biological_Process_2018	detection of chemical stimulus involved in sensory perception (GO:0050907)	4
GO_Biological_Process_2018	chemical homeostasis (GO:0048878)	4
GO_Biological_Process_2018	snRNA processing (GO:0016180)	4
GO_Biological_Process_2018	response to interferon-alpha (GO:0035455)	4
GO_Biological_Process_2018	protein import into mitochondrial matrix (GO:0030150)	4
GO_Biological_Process_2018	T-helper cell lineage commitment (GO:0002295)	4
GO_Biological_Process_2018	amyloid precursor protein catabolic process (GO:0042987)	4
GO_Biological_Process_2018	regulation of cell cycle G1/S phase transition (GO:1902806)	4
GO_Biological_Process_2018	regulation of neurotransmitter receptor activity (GO:0099601)	4
GO_Biological_Process_2018	regulation of protein tyrosine kinase activity (GO:0061097)	4
GO_Biological_Process_2018	regulation of intracellular protein transport (GO:0033157)	4
GO_Biological_Process_2018	sulfur compound transport (GO:0072348)	4
GO_Biological_Process_2018	protein localization to nucleus (GO:0034504)	4
GO_Biological_Process_2018	potassium ion import across plasma membrane (GO:1990573)	4
GO_Biological_Process_2018	regulation of alcohol biosynthetic process (GO:1902930)	4
GO_Biological_Process_2018	fatty acid metabolic process (GO:0006631)	4
GO_Biological_Process_2018	RNA export from nucleus (GO:0006405)	4
GO_Biological_Process_2018	acetyl-CoA metabolic process (GO:0006084)	4
GO_Biological_Process_2018	cellular nitrogen compound catabolic process (GO:0044270)	4
GO_Biological_Process_2018	regulation of vesicle-mediated transport (GO:0060627)	4
GO_Biological_Process_2018	mRNA-containing ribonucleoprotein complex export from nucleus (GO:0071427)	4
GO_Biological_Process_2018	mRNA transport (GO:0051028)	4
GO_Biological_Process_2018	intracellular protein transport (GO:0006886)	4
GO_Biological_Process_2018	cellular protein localization (GO:0034613)	4
GO_Biological_Process_2018	positive regulation of response to external stimulus (GO:0032103)	4
GO_Biological_Process_2018	positive regulation of histone acetylation (GO:0035066)	4
GO_Biological_Process_2018	cell morphogenesis involved in differentiation (GO:0000904)	4
GO_Biological_Process_2018	cellular hyperosmotic response (GO:0071474)	4
GO_Biological_Process_2018	regulation of fibroblast proliferation (GO:0048145)	4
GO_Biological_Process_2018	negative regulation of phosphatase activity (GO:0010923)	3
GO_Biological_Process_2018	positive regulation of endothelial cell proliferation (GO:0001938)	3
GO_Biological_Process_2018	skeletal muscle organ development (GO:0060538)	3
GO_Biological_Process_2018	negative regulation of macrophage derived foam cell differentiation (GO:0010745)	3
GO_Biological_Process_2018	negative regulation of neuron death (GO:1901215)	3
GO_Biological_Process_2018	metallo-sulfur cluster assembly (GO:0031163)	3
GO_Biological_Process_2018	cellular response to transforming growth factor beta stimulus (GO:0071560)	3
GO_Biological_Process_2018	regulation of phosphatase activity (GO:0010921)	3
GO_Biological_Process_2018	skeletal muscle tissue development (GO:0007519)	3
GO_Biological_Process_2018	mRNA transcription (GO:0009299)	3
GO_Biological_Process_2018	negative regulation of protein tyrosine kinase activity (GO:0061099)	3
GO_Biological_Process_2018	stabilization of membrane potential (GO:0030322)	3
GO_Biological_Process_2018	positive regulation of fatty acid biosynthetic process (GO:0045723)	3
GO_Biological_Process_2018	regulation of cholesterol esterification (GO:0010872)	3
GO_Biological_Process_2018	regulation of striated muscle contraction (GO:0006942)	3
GO_Biological_Process_2018	regulation of vasoconstriction (GO:0019229)	3
GO_Biological_Process_2018	positive regulation of calcium ion transmembrane transporter activity (GO:1901021)	3
GO_Biological_Process_2018	vitamin transport (GO:0051180)	3
GO_Biological_Process_2018	cholesterol efflux (GO:0033344)	3
GO_Biological_Process_2018	negative regulation of cell differentiation (GO:0045596)	3
GO_Biological_Process_2018	negative regulation of nitric oxide metabolic process (GO:1904406)	3
GO_Biological_Process_2018	negative regulation of nitric oxide biosynthetic process (GO:0045019)	3
GO_Biological_Process_2018	regulation of protein binding (GO:0043393)	3
GO_Biological_Process_2018	regulation of immune response (GO:0050776)	3
GO_Biological_Process_2018	regulation of regulated secretory pathway (GO:1903305)	3
GO_Biological_Process_2018	iron-sulfur cluster assembly (GO:0016226)	3
GO_Biological_Process_2018	DNA-templated transcription, initiation (GO:0006352)	3
GO_Biological_Process_2018	regulation of macromolecule metabolic process (GO:0060255)	3
GO_Biological_Process_2018	myelination in peripheral nervous system (GO:0022011)	3
GO_Biological_Process_2018	negative regulation of reactive oxygen species biosynthetic process (GO:1903427)	3
GO_Biological_Process_2018	protein localization to endoplasmic reticulum (GO:0070972)	3
GO_Biological_Process_2018	RNA interference (GO:0016246)	3
GO_Biological_Process_2018	regulation of cytolysis (GO:0042268)	3
GO_Biological_Process_2018	neurotransmitter receptor diffusion trapping (GO:0099628)	3
GO_Biological_Process_2018	postsynaptic neurotransmitter receptor diffusion trapping (GO:0098970)	3
GO_Biological_Process_2018	exocyst localization (GO:0051601)	3
GO_Biological_Process_2018	4-hydroxyproline metabolic process (GO:0019471)	3
GO_Biological_Process_2018	negative regulation of leukocyte mediated cytotoxicity (GO:0001911)	3
GO_Biological_Process_2018	inorganic cation transmembrane transport (GO:0098662)	3
GO_Biological_Process_2018	cytoskeleton-dependent intracellular transport (GO:0030705)	3
GO_Biological_Process_2018	axon development (GO:0061564)	3
GO_Biological_Process_2018	negative regulation of transcription, DNA-templated (GO:0045892)	3
GO_Biological_Process_2018	positive regulation of mitochondrial membrane potential (GO:0010918)	3
GO_Biological_Process_2018	release of sequestered calcium ion into cytosol (GO:0051209)	3
GO_Biological_Process_2018	negative regulation of dendritic cell apoptotic process (GO:2000669)	3
GO_Biological_Process_2018	negative regulation of sequestering of calcium ion (GO:0051283)	3
GO_Biological_Process_2018	nicotinamide nucleotide metabolic process (GO:0046496)	3
GO_Biological_Process_2018	zinc II ion transport (GO:0006829)	3
GO_Biological_Process_2018	sensory perception of light stimulus (GO:0050953)	3
GO_Biological_Process_2018	protein trimerization (GO:0070206)	3
GO_Biological_Process_2018	visual perception (GO:0007601)	3
GO_Biological_Process_2018	negative regulation of response to stimulus (GO:0048585)	3
GO_Biological_Process_2018	platelet degranulation (GO:0002576)	3
GO_Biological_Process_2018	regulation of sequestering of zinc ion (GO:0061088)	3
GO_Biological_Process_2018	embryonic skeletal joint development (GO:0072498)	3
GO_Biological_Process_2018	positive regulation of T-helper 2 cell differentiation (GO:0045630)	3
GO_Biological_Process_2018	endosome to lysosome transport via multivesicular body sorting pathway (GO:0032510)	3
GO_Biological_Process_2018	sodium ion transport (GO:0006814)	3
GO_Biological_Process_2018	myofibril assembly (GO:0030239)	3
GO_Biological_Process_2018	negative regulation of innate immune response (GO:0045824)	3
GO_Biological_Process_2018	neuromuscular junction development (GO:0007528)	3
GO_Biological_Process_2018	hemidesmosome assembly (GO:0031581)	3
GO_Biological_Process_2018	positive regulation of T-helper cell differentiation (GO:0045624)	3
GO_Biological_Process_2018	cell-substrate junction assembly (GO:0007044)	3
GO_Biological_Process_2018	dendritic cell differentiation (GO:0097028)	3
GO_Biological_Process_2018	positive regulation of mRNA processing (GO:0050685)	3
GO_Biological_Process_2018	calcium-dependent cell-cell adhesion via plasma membrane cell adhesion molecules (GO:0016339)	3
GO_Biological_Process_2018	mononuclear cell differentiation (GO:1903131)	3
GO_Biological_Process_2018	monocyte differentiation (GO:0030224)	3
GO_Biological_Process_2018	negative regulation of epithelial to mesenchymal transition (GO:0010719)	3
GO_Biological_Process_2018	regulation of dephosphorylation (GO:0035303)	3
GO_Biological_Process_2018	organic substance transport (GO:0071702)	3
GO_Biological_Process_2018	bicarbonate transport (GO:0015701)	3
GO_Biological_Process_2018	myeloid dendritic cell activation (GO:0001773)	3
GO_Biological_Process_2018	positive regulation of peptidyl-tyrosine phosphorylation (GO:0050731)	3
GO_Biological_Process_2018	modulation by host of viral process (GO:0044788)	3
GO_Biological_Process_2018	acyl-CoA metabolic process (GO:0006637)	3
GO_Biological_Process_2018	vesicle-mediated transport in synapse (GO:0099003)	3
GO_Biological_Process_2018	cellular response to light stimulus (GO:0071482)	3
GO_Biological_Process_2018	regulation of protein exit from endoplasmic reticulum (GO:0070861)	3
GO_Biological_Process_2018	positive regulation of protein exit from endoplasmic reticulum (GO:0070863)	3
GO_Biological_Process_2018	regulated exocytosis (GO:0045055)	3
GO_Biological_Process_2018	DNA catabolic process (GO:0006308)	3
GO_Biological_Process_2018	leukocyte adhesion to vascular endothelial cell (GO:0061756)	3
GO_Biological_Process_2018	negative regulation of NF-kappaB import into nucleus (GO:0042347)	3
GO_Biological_Process_2018	leukocyte tethering or rolling (GO:0050901)	3
GO_Biological_Process_2018	negative regulation of transcription elongation from RNA polymerase II promoter (GO:0034244)	3
GO_Biological_Process_2018	nucleoside salvage (GO:0043174)	3
GO_Biological_Process_2018	snRNA 3'-end processing (GO:0034472)	3
GO_Biological_Process_2018	neutrophil activation involved in immune response (GO:0002283)	3
GO_Biological_Process_2018	nose development (GO:0043584)	3
GO_Biological_Process_2018	regulation of T-helper 2 cell cytokine production (GO:2000551)	3
GO_Biological_Process_2018	regulation of interleukin-4 production (GO:0032673)	3
GO_Biological_Process_2018	negative regulation of viral entry into host cell (GO:0046597)	3
GO_Biological_Process_2018	muscle filament sliding (GO:0030049)	3
GO_Biological_Process_2018	actin-myosin filament sliding (GO:0033275)	3
GO_Biological_Process_2018	ERAD pathway (GO:0036503)	3
GO_Biological_Process_2018	sodium ion export from cell (GO:0036376)	3
GO_Biological_Process_2018	sodium ion export (GO:0071436)	3
GO_Biological_Process_2018	regulation of nucleocytoplasmic transport (GO:0046822)	3
GO_Biological_Process_2018	negative regulation of leukocyte degranulation (GO:0043301)	3
GO_Biological_Process_2018	pyrimidine-containing compound metabolic process (GO:0072527)	3
GO_Biological_Process_2018	regulation of muscle contraction (GO:0006937)	3
GO_Biological_Process_2018	regulation of nitric oxide biosynthetic process (GO:0045428)	3
GO_Biological_Process_2018	heart contraction (GO:0060047)	3
GO_Biological_Process_2018	negative regulation of immune effector process (GO:0002698)	3
GO_Biological_Process_2018	positive regulation of nitric-oxide synthase activity (GO:0051000)	3
GO_Biological_Process_2018	regulation of cation channel activity (GO:2001257)	3
GO_Biological_Process_2018	positive regulation of fibroblast proliferation (GO:0048146)	3
GO_Biological_Process_2018	heterocycle biosynthetic process (GO:0018130)	3
GO_Biological_Process_2018	Golgi vesicle transport (GO:0048193)	3
GO_Biological_Process_2018	response to endoplasmic reticulum stress (GO:0034976)	3
GO_Biological_Process_2018	endodermal cell differentiation (GO:0035987)	3
GO_Biological_Process_2018	tumor necrosis factor-mediated signaling pathway (GO:0033209)	3
GO_Biological_Process_2018	response to UV (GO:0009411)	3
GO_Biological_Process_2018	neuronal ion channel clustering (GO:0045161)	3
GO_Biological_Process_2018	cellular protein complex assembly (GO:0043623)	3
GO_Biological_Process_2018	neuron projection regeneration (GO:0031102)	3
GO_Biological_Process_2018	potassium ion import (GO:0010107)	3
GO_Biological_Process_2018	lipoprotein metabolic process (GO:0042157)	3
GO_Biological_Process_2018	positive regulation of cholesterol esterification (GO:0010873)	3
GO_Biological_Process_2018	regulation of cholesterol metabolic process (GO:0090181)	3
GO_Biological_Process_2018	signal transduction by p53 class mediator (GO:0072331)	3
GO_Biological_Process_2018	cell-cell junction maintenance (GO:0045217)	3
GO_Biological_Process_2018	potassium ion homeostasis (GO:0055075)	3
GO_Biological_Process_2018	import across plasma membrane (GO:0098739)	3
GO_Biological_Process_2018	nuclear import (GO:0051170)	3
GO_Biological_Process_2018	regulation of brown fat cell differentiation (GO:0090335)	3
GO_Biological_Process_2018	carbohydrate homeostasis (GO:0033500)	3
GO_Biological_Process_2018	response to nutrient levels (GO:0031667)	3
GO_Biological_Process_2018	phosphatidylcholine acyl-chain remodeling (GO:0036151)	3
GO_Biological_Process_2018	regulation of adaptive immune response (GO:0002819)	3
GO_Biological_Process_2018	positive regulation of gene expression (GO:0010628)	3
GO_Biological_Process_2018	regulation of cellular response to heat (GO:1900034)	3
GO_Biological_Process_2018	cell-cell junction assembly (GO:0007043)	3
GO_Biological_Process_2018	positive regulation of fertilization (GO:1905516)	3
GO_Biological_Process_2018	regulation of secretion by cell (GO:1903530)	3
GO_Biological_Process_2018	poly(A)+ mRNA export from nucleus (GO:0016973)	3
GO_Biological_Process_2018	mRNA export from nucleus (GO:0006406)	3
GO_Biological_Process_2018	tooth mineralization (GO:0034505)	3
GO_Biological_Process_2018	cytochrome complex assembly (GO:0017004)	3
GO_Biological_Process_2018	energy coupled proton transport, down electrochemical gradient (GO:0015985)	3
GO_Biological_Process_2018	lipoprotein biosynthetic process (GO:0042158)	3
GO_Biological_Process_2018	regulation of JAK-STAT cascade (GO:0046425)	3
GO_Biological_Process_2018	IRES-dependent viral translational initiation (GO:0075522)	3
GO_Biological_Process_2018	growth hormone receptor signaling pathway (GO:0060396)	3
GO_Biological_Process_2018	positive regulation of histone H4 acetylation (GO:0090240)	3
GO_Biological_Process_2018	regulation of single stranded viral RNA replication via double stranded DNA intermediate (GO:0045091)	3
GO_Biological_Process_2018	negative regulation of single stranded viral RNA replication via double stranded DNA intermediate (GO:0045869)	3
GO_Biological_Process_2018	DNA cytosine deamination (GO:0070383)	3
GO_Biological_Process_2018	negative regulation of leukocyte activation (GO:0002695)	3
GO_Biological_Process_2018	cytidine to uridine editing (GO:0016554)	3
GO_Biological_Process_2018	copper ion import (GO:0015677)	3
GO_Biological_Process_2018	positive regulation of calcium ion transport (GO:0051928)	3
GO_Biological_Process_2018	positive regulation of cardiocyte differentiation (GO:1905209)	3
GO_Biological_Process_2018	DNA deamination (GO:0045006)	3
GO_Biological_Process_2018	spindle assembly checkpoint (GO:0071173)	3
GO_Biological_Process_2018	mitotic spindle assembly checkpoint (GO:0007094)	3
GO_Biological_Process_2018	mitotic spindle checkpoint (GO:0071174)	3
GO_Biological_Process_2018	base conversion or substitution editing (GO:0016553)	3
GO_Biological_Process_2018	substrate adhesion-dependent cell spreading (GO:0034446)	3
GO_Biological_Process_2018	purine ribonucleotide metabolic process (GO:0009150)	3
GO_Biological_Process_2018	hexose biosynthetic process (GO:0019319)	3
GO_Biological_Process_2018	gluconeogenesis (GO:0006094)	3
GO_Biological_Process_2018	regulation of telomere maintenance via telomere lengthening (GO:1904356)	3
GO_Biological_Process_2018	complement receptor mediated signaling pathway (GO:0002430)	2
GO_Biological_Process_2018	lipid catabolic process (GO:0016042)	2
GO_Biological_Process_2018	regulation of phosphoprotein phosphatase activity (GO:0043666)	2
GO_Biological_Process_2018	amide transport (GO:0042886)	2
GO_Biological_Process_2018	immune response-activating cell surface receptor signaling pathway (GO:0002429)	2
GO_Biological_Process_2018	folic acid transport (GO:0015884)	2
GO_Biological_Process_2018	mRNA transcription from RNA polymerase II promoter (GO:0042789)	2
GO_Biological_Process_2018	cholesterol homeostasis (GO:0042632)	2
GO_Biological_Process_2018	sterol homeostasis (GO:0055092)	2
GO_Biological_Process_2018	positive regulation of epidermal cell differentiation (GO:0045606)	2
GO_Biological_Process_2018	positive regulation of G-protein coupled receptor protein signaling pathway (GO:0045745)	2
GO_Biological_Process_2018	positive regulation of cytosolic calcium ion concentration (GO:0007204)	2
GO_Biological_Process_2018	positive regulation of epidermis development (GO:0045684)	2
GO_Biological_Process_2018	negative regulation of neuron apoptotic process (GO:0043524)	2
GO_Biological_Process_2018	regulation of cytosolic calcium ion concentration (GO:0051480)	2
GO_Biological_Process_2018	negative regulation of hydrogen peroxide-induced cell death (GO:1903206)	2
GO_Biological_Process_2018	transforming growth factor beta receptor signaling pathway (GO:0007179)	2
GO_Biological_Process_2018	positive regulation of epithelial cell proliferation (GO:0050679)	2
GO_Biological_Process_2018	negative regulation of tumor necrosis factor production (GO:0032720)	2
GO_Biological_Process_2018	regulation of macrophage derived foam cell differentiation (GO:0010743)	2
GO_Biological_Process_2018	positive regulation of blood circulation (GO:1903524)	2
GO_Biological_Process_2018	regulation of blood vessel endothelial cell migration (GO:0043535)	2
GO_Biological_Process_2018	phospholipid efflux (GO:0033700)	2
GO_Biological_Process_2018	positive regulation of keratinocyte differentiation (GO:0045618)	2
GO_Biological_Process_2018	regulation of cyclic-nucleotide phosphodiesterase activity (GO:0051342)	2
GO_Biological_Process_2018	lymphatic endothelial cell differentiation (GO:0060836)	2
GO_Biological_Process_2018	regulation of dendritic cell differentiation (GO:2001198)	2
GO_Biological_Process_2018	regulation of cell cycle process (GO:0010564)	2
GO_Biological_Process_2018	positive regulation of alpha-beta T cell proliferation (GO:0046641)	2
GO_Biological_Process_2018	hemopoiesis (GO:0030097)	2
GO_Biological_Process_2018	negative regulation of MAP kinase activity (GO:0043407)	2
GO_Biological_Process_2018	negative regulation of interleukin-1 production (GO:0032692)	2
GO_Biological_Process_2018	positive regulation of cAMP metabolic process (GO:0030816)	2
GO_Biological_Process_2018	regulation of epidermal cell differentiation (GO:0045604)	2
GO_Biological_Process_2018	positive regulation of cAMP biosynthetic process (GO:0030819)	2
GO_Biological_Process_2018	modified amino acid transport (GO:0072337)	2
GO_Biological_Process_2018	flavonoid glucuronidation (GO:0052696)	2
GO_Biological_Process_2018	xenobiotic glucuronidation (GO:0052697)	2
GO_Biological_Process_2018	positive regulation of membrane potential (GO:0045838)	2
GO_Biological_Process_2018	cellular calcium ion homeostasis (GO:0006874)	2
GO_Biological_Process_2018	positive regulation of G2/M transition of mitotic cell cycle (GO:0010971)	2
GO_Biological_Process_2018	leptin-mediated signaling pathway (GO:0033210)	2
GO_Biological_Process_2018	regulation of dendritic cell antigen processing and presentation (GO:0002604)	2
GO_Biological_Process_2018	regulation of cardiac muscle hypertrophy (GO:0010611)	2
GO_Biological_Process_2018	negative regulation of cytokine production (GO:0001818)	2
GO_Biological_Process_2018	positive regulation of cell cycle G2/M phase transition (GO:1902751)	2
GO_Biological_Process_2018	protein monoubiquitination (GO:0006513)	2
GO_Biological_Process_2018	regulation of cytokinesis (GO:0032465)	2
GO_Biological_Process_2018	negative regulation of cellular macromolecule biosynthetic process (GO:2000113)	2
GO_Biological_Process_2018	intermediate filament organization (GO:0045109)	2
GO_Biological_Process_2018	macrophage chemotaxis (GO:0048246)	2
GO_Biological_Process_2018	macrophage migration (GO:1905517)	2
GO_Biological_Process_2018	carbohydrate catabolic process (GO:0016052)	2
GO_Biological_Process_2018	citrate metabolic process (GO:0006101)	2
GO_Biological_Process_2018	carbohydrate transport (GO:0008643)	2
GO_Biological_Process_2018	striated muscle hypertrophy (GO:0014897)	2
GO_Biological_Process_2018	regulation of calcium ion transport (GO:0051924)	2
GO_Biological_Process_2018	protein depolymerization (GO:0051261)	2
GO_Biological_Process_2018	microtubule depolymerization (GO:0007019)	2
GO_Biological_Process_2018	calcium ion transmembrane import into cytosol (GO:0097553)	2
GO_Biological_Process_2018	mitochondrion distribution (GO:0048311)	2
GO_Biological_Process_2018	low-density lipoprotein particle remodeling (GO:0034374)	2
GO_Biological_Process_2018	regulation of steroid metabolic process (GO:0019218)	2
GO_Biological_Process_2018	negative regulation of gene expression (GO:0010629)	2
GO_Biological_Process_2018	GPI anchor biosynthetic process (GO:0006506)	2
GO_Biological_Process_2018	nervous system development (GO:0007399)	2
GO_Biological_Process_2018	synapse assembly (GO:0007416)	2
GO_Biological_Process_2018	regulation of cysteine-type endopeptidase activity (GO:2000116)	2
GO_Biological_Process_2018	nitrogen compound transport (GO:0071705)	2
GO_Biological_Process_2018	detection of chemical stimulus involved in sensory perception of bitter taste (GO:0001580)	2
GO_Biological_Process_2018	cell-cell adhesion via plasma-membrane adhesion molecules (GO:0098742)	2
GO_Biological_Process_2018	sensory perception of bitter taste (GO:0050913)	2
GO_Biological_Process_2018	chemical synaptic transmission (GO:0007268)	2
GO_Biological_Process_2018	detection of chemical stimulus involved in sensory perception of taste (GO:0050912)	2
GO_Biological_Process_2018	urate transport (GO:0015747)	2
GO_Biological_Process_2018	carboxylic acid transmembrane transport (GO:1905039)	2
GO_Biological_Process_2018	transcription from RNA polymerase II promoter (GO:0006366)	2
GO_Biological_Process_2018	sodium-independent organic anion transport (GO:0043252)	2
GO_Biological_Process_2018	immunoglobulin mediated immune response (GO:0016064)	2
GO_Biological_Process_2018	positive regulation of viral process (GO:0048524)	2
GO_Biological_Process_2018	regulation of fertilization (GO:0080154)	2
GO_Biological_Process_2018	negative regulation of necroptotic process (GO:0060546)	2
GO_Biological_Process_2018	activation of cysteine-type endopeptidase activity (GO:0097202)	2
GO_Biological_Process_2018	positive regulation of protein depolymerization (GO:1901881)	2
GO_Biological_Process_2018	negative regulation of serine-type endopeptidase activity (GO:1900004)	2
GO_Biological_Process_2018	adipose tissue development (GO:0060612)	2
GO_Biological_Process_2018	toll-like receptor 3 signaling pathway (GO:0034138)	2
GO_Biological_Process_2018	negative regulation of serine-type peptidase activity (GO:1902572)	2
GO_Biological_Process_2018	small RNA loading onto RISC (GO:0070922)	2
GO_Biological_Process_2018	protein targeting to mitochondrion (GO:0006626)	2
GO_Biological_Process_2018	positive regulation of ion transmembrane transporter activity (GO:0032414)	2
GO_Biological_Process_2018	regulation of acrosome reaction (GO:0060046)	2
GO_Biological_Process_2018	negative regulation of multicellular organismal process (GO:0051241)	2
GO_Biological_Process_2018	ion transport (GO:0006811)	2
GO_Biological_Process_2018	regulation of cardiac muscle cell action potential (GO:0098901)	2
GO_Biological_Process_2018	myeloid dendritic cell differentiation (GO:0043011)	2
GO_Biological_Process_2018	cellular response to alcohol (GO:0097306)	2
GO_Biological_Process_2018	regulation of intracellular pH (GO:0051453)	2
GO_Biological_Process_2018	ATP hydrolysis coupled proton transport (GO:0015991)	2
GO_Biological_Process_2018	positive regulation of transmembrane transport (GO:0034764)	2
GO_Biological_Process_2018	carnitine transport (GO:0015879)	2
GO_Biological_Process_2018	amino-acid betaine transport (GO:0015838)	2
GO_Biological_Process_2018	regulation of hormone biosynthetic process (GO:0046885)	2
GO_Biological_Process_2018	ATP hydrolysis coupled cation transmembrane transport (GO:0099132)	2
GO_Biological_Process_2018	leukocyte aggregation (GO:0070486)	2
GO_Biological_Process_2018	defense response to fungus (GO:0050832)	2
GO_Biological_Process_2018	purine-containing compound metabolic process (GO:0072521)	2
GO_Biological_Process_2018	negative regulation of STAT cascade (GO:1904893)	2
GO_Biological_Process_2018	dicarboxylic acid transport (GO:0006835)	2
GO_Biological_Process_2018	extrinsic apoptotic signaling pathway (GO:0097191)	2
GO_Biological_Process_2018	positive regulation of transcription, DNA-templated (GO:0045893)	2
GO_Biological_Process_2018	negative regulation of cysteine-type endopeptidase activity (GO:2000117)	2
GO_Biological_Process_2018	regulation of serine-type endopeptidase activity (GO:1900003)	2
GO_Biological_Process_2018	cell morphogenesis (GO:0000902)	2
GO_Biological_Process_2018	early endosome to late endosome transport (GO:0045022)	2
GO_Biological_Process_2018	regulation of epithelial to mesenchymal transition (GO:0010717)	2
GO_Biological_Process_2018	glycerophospholipid metabolic process (GO:0006650)	2
GO_Biological_Process_2018	transepithelial transport (GO:0070633)	2
GO_Biological_Process_2018	positive regulation of monocyte differentiation (GO:0045657)	2
GO_Biological_Process_2018	negative regulation of vascular permeability (GO:0043116)	2
GO_Biological_Process_2018	fibroblast growth factor receptor signaling pathway (GO:0008543)	2
GO_Biological_Process_2018	anion transport (GO:0006820)	2
GO_Biological_Process_2018	brain development (GO:0007420)	2
GO_Biological_Process_2018	positive regulation of immunoglobulin production (GO:0002639)	2
GO_Biological_Process_2018	positive regulation of protein modification by small protein conjugation or removal (GO:1903322)	2
GO_Biological_Process_2018	positive regulation of potassium ion transport (GO:0043268)	2
GO_Biological_Process_2018	positive regulation of interleukin-10 production (GO:0032733)	2
GO_Biological_Process_2018	synaptic vesicle endocytosis (GO:0048488)	2
GO_Biological_Process_2018	negative regulation of transcription from RNA polymerase II promoter (GO:0000122)	2
GO_Biological_Process_2018	negative regulation of nucleic acid-templated transcription (GO:1903507)	2
GO_Biological_Process_2018	regulation of interleukin-10 production (GO:0032653)	2
GO_Biological_Process_2018	semaphorin-plexin signaling pathway involved in axon guidance (GO:1902287)	2
GO_Biological_Process_2018	protein modification by small protein conjugation or removal (GO:0070647)	2
GO_Biological_Process_2018	positive regulation of cellular protein metabolic process (GO:0032270)	2
GO_Biological_Process_2018	positive regulation of nucleic acid-templated transcription (GO:1903508)	2
GO_Biological_Process_2018	regulation of JNK cascade (GO:0046328)	2
GO_Biological_Process_2018	negative regulation of G1/S transition of mitotic cell cycle (GO:2000134)	2
GO_Biological_Process_2018	calcium ion import (GO:0070509)	2
GO_Biological_Process_2018	positive regulation of ER-associated ubiquitin-dependent protein catabolic process (GO:1903071)	2
GO_Biological_Process_2018	regulation of lymphocyte migration (GO:2000401)	2
GO_Biological_Process_2018	positive regulation of stem cell proliferation (GO:2000648)	2
GO_Biological_Process_2018	regulation of cardiac muscle cell membrane repolarization (GO:0099623)	2
GO_Biological_Process_2018	membrane protein ectodomain proteolysis (GO:0006509)	2
GO_Biological_Process_2018	regulation of receptor biosynthetic process (GO:0010869)	2
GO_Biological_Process_2018	protein carboxylation (GO:0018214)	2
GO_Biological_Process_2018	peptidyl-glutamic acid carboxylation (GO:0017187)	2
GO_Biological_Process_2018	negative regulation of cell cycle G1/S phase transition (GO:1902807)	2
GO_Biological_Process_2018	renal system development (GO:0072001)	2
GO_Biological_Process_2018	sodium ion homeostasis (GO:0055078)	2
GO_Biological_Process_2018	T-helper 17 cell differentiation (GO:0072539)	2
GO_Biological_Process_2018	pyrimidine nucleobase metabolic process (GO:0006206)	2
GO_Biological_Process_2018	aldehyde biosynthetic process (GO:0046184)	2
GO_Biological_Process_2018	positive regulation of interleukin-4 production (GO:0032753)	2
GO_Biological_Process_2018	tRNA transport (GO:0051031)	2
GO_Biological_Process_2018	regulation of protein export from nucleus (GO:0046825)	2
GO_Biological_Process_2018	regulation of cytokine production (GO:0001817)	2
GO_Biological_Process_2018	cellular potassium ion homeostasis (GO:0030007)	2
GO_Biological_Process_2018	positive regulation of T cell chemotaxis (GO:0010820)	2
GO_Biological_Process_2018	oogenesis (GO:0048477)	2
GO_Biological_Process_2018	regulation of glycolytic process (GO:0006110)	2
GO_Biological_Process_2018	protein alpha-1,2-demannosylation (GO:0036508)	2
GO_Biological_Process_2018	mitotic spindle midzone assembly (GO:0051256)	2
GO_Biological_Process_2018	cellular copper ion homeostasis (GO:0006878)	2
GO_Biological_Process_2018	detection of bacterium (GO:0016045)	2
GO_Biological_Process_2018	regulation of T cell chemotaxis (GO:0010819)	2
GO_Biological_Process_2018	respiratory chain complex IV assembly (GO:0008535)	2
GO_Biological_Process_2018	histone-serine phosphorylation (GO:0035404)	2
GO_Biological_Process_2018	positive regulation of protein export from nucleus (GO:0046827)	2
GO_Biological_Process_2018	regulation of gene silencing by miRNA (GO:0060964)	2
GO_Biological_Process_2018	cytoplasmic mRNA processing body assembly (GO:0033962)	2
GO_Biological_Process_2018	mitotic spindle elongation (GO:0000022)	2
GO_Biological_Process_2018	neutrophil degranulation (GO:0043312)	2
GO_Biological_Process_2018	response to retinoic acid (GO:0032526)	2
GO_Biological_Process_2018	regulation of extracellular matrix organization (GO:1903053)	2
GO_Biological_Process_2018	negative regulation of striated muscle tissue development (GO:0045843)	2
GO_Biological_Process_2018	negative regulation of nervous system development (GO:0051961)	2
GO_Biological_Process_2018	cellular response to ketone (GO:1901655)	2
GO_Biological_Process_2018	regulation of viral transcription (GO:0046782)	2
GO_Biological_Process_2018	negative regulation of interleukin-12 production (GO:0032695)	2
GO_Biological_Process_2018	regulation of mitotic spindle assembly (GO:1901673)	2
GO_Biological_Process_2018	protein exit from endoplasmic reticulum (GO:0032527)	2
GO_Biological_Process_2018	cell-cell adhesion mediated by cadherin (GO:0044331)	2
GO_Biological_Process_2018	negative regulation of cell cycle (GO:0045786)	2
GO_Biological_Process_2018	proteasome-mediated ubiquitin-dependent protein catabolic process (GO:0043161)	2
GO_Biological_Process_2018	positive regulation of T cell cytokine production (GO:0002726)	2
GO_Biological_Process_2018	sulfur amino acid biosynthetic process (GO:0000097)	2
GO_Biological_Process_2018	molybdopterin cofactor metabolic process (GO:0043545)	2
GO_Biological_Process_2018	molybdopterin cofactor biosynthetic process (GO:0032324)	2
GO_Biological_Process_2018	positive regulation of immunoglobulin mediated immune response (GO:0002891)	2
GO_Biological_Process_2018	regulation of T-helper 2 cell differentiation (GO:0045628)	2
GO_Biological_Process_2018	stem cell differentiation (GO:0048863)	2
GO_Biological_Process_2018	regulation of protein localization (GO:0032880)	2
GO_Biological_Process_2018	cargo loading into vesicle (GO:0035459)	2
GO_Biological_Process_2018	negative regulation of lymphocyte apoptotic process (GO:0070229)	2
GO_Biological_Process_2018	negative regulation of DNA-templated transcription, elongation (GO:0032785)	2
GO_Biological_Process_2018	ubiquitin-dependent ERAD pathway (GO:0030433)	2
GO_Biological_Process_2018	myotube differentiation (GO:0014902)	2
GO_Biological_Process_2018	nuclear pore organization (GO:0006999)	2
GO_Biological_Process_2018	cellular response to virus (GO:0098586)	2
GO_Biological_Process_2018	proteasomal protein catabolic process (GO:0010498)	2
GO_Biological_Process_2018	antigen processing and presentation of exogenous peptide antigen (GO:0002478)	2
GO_Biological_Process_2018	antigen processing and presentation of exogenous peptide antigen via MHC class II (GO:0019886)	2
GO_Biological_Process_2018	antigen processing and presentation of peptide antigen via MHC class II (GO:0002495)	2
GO_Biological_Process_2018	positive regulation of transcription from RNA polymerase II promoter in response to endoplasmic reticulum stress (GO:1990440)	2
GO_Biological_Process_2018	cytokine-mediated signaling pathway (GO:0019221)	2
GO_Biological_Process_2018	ER overload response (GO:0006983)	2
GO_Biological_Process_2018	regulation of T cell proliferation (GO:0042129)	2
GO_Biological_Process_2018	negative regulation of transcription factor import into nucleus (GO:0042992)	2
GO_Biological_Process_2018	high-density lipoprotein particle remodeling (GO:0034375)	2
GO_Biological_Process_2018	reverse cholesterol transport (GO:0043691)	2
GO_Biological_Process_2018	transcription, DNA-templated (GO:0006351)	2
GO_Biological_Process_2018	inner mitochondrial membrane organization (GO:0007007)	2
GO_Biological_Process_2018	mitochondrial transport (GO:0006839)	2
GO_Biological_Process_2018	positive regulation of transcription from RNA polymerase II promoter in response to stress (GO:0036003)	2
GO_Biological_Process_2018	regulation of keratinocyte differentiation (GO:0045616)	2
GO_Biological_Process_2018	regulation of cytokine secretion involved in immune response (GO:0002739)	2
GO_Biological_Process_2018	beta-catenin-TCF complex assembly (GO:1904837)	2
GO_Biological_Process_2018	Notch receptor processing (GO:0007220)	2
GO_Biological_Process_2018	regulation of membrane repolarization (GO:0060306)	2
GO_Biological_Process_2018	positive regulation of catabolic process (GO:0009896)	2
GO_Biological_Process_2018	telomere maintenance via telomere lengthening (GO:0010833)	2
GO_Biological_Process_2018	positive regulation of lymphocyte proliferation (GO:0050671)	2
GO_Biological_Process_2018	triglyceride-rich lipoprotein particle remodeling (GO:0034370)	2
GO_Biological_Process_2018	high-density lipoprotein particle assembly (GO:0034380)	2
GO_Biological_Process_2018	Notch receptor processing, ligand-dependent (GO:0035333)	2
GO_Biological_Process_2018	telomere maintenance via telomerase (GO:0007004)	2
GO_Biological_Process_2018	regulation of ion transmembrane transport (GO:0034765)	2
GO_Biological_Process_2018	RNA transport (GO:0050658)	2
GO_Biological_Process_2018	regulation of transcription involved in cell fate commitment (GO:0060850)	2
GO_Biological_Process_2018	ATP metabolic process (GO:0046034)	2
GO_Biological_Process_2018	regulation of cholesterol biosynthetic process (GO:0045540)	2
GO_Biological_Process_2018	RNA-dependent DNA biosynthetic process (GO:0006278)	2
GO_Biological_Process_2018	regulation of ventricular cardiac muscle cell membrane repolarization (GO:0060307)	2
GO_Biological_Process_2018	regulation of phosphate metabolic process (GO:0019220)	2
GO_Biological_Process_2018	positive regulation of protein metabolic process (GO:0051247)	2
GO_Biological_Process_2018	nuclear export (GO:0051168)	2
GO_Biological_Process_2018	positive regulation of heterotypic cell-cell adhesion (GO:0034116)	2
GO_Biological_Process_2018	Golgi ribbon formation (GO:0090161)	2
GO_Biological_Process_2018	regulation of muscle cell differentiation (GO:0051147)	2
GO_Biological_Process_2018	glucose homeostasis (GO:0042593)	2
GO_Biological_Process_2018	phosphatidylglycerol acyl-chain remodeling (GO:0036148)	2
GO_Biological_Process_2018	chitin metabolic process (GO:0006030)	2
GO_Biological_Process_2018	chitin catabolic process (GO:0006032)	2
GO_Biological_Process_2018	lipid homeostasis (GO:0055088)	2
GO_Biological_Process_2018	phosphatidylserine metabolic process (GO:0006658)	2
GO_Biological_Process_2018	negative regulation of appetite (GO:0032099)	2
GO_Biological_Process_2018	regulation of mRNA catabolic process (GO:0061013)	2
GO_Biological_Process_2018	histone deacetylation (GO:0016575)	2
GO_Biological_Process_2018	phosphatidylserine acyl-chain remodeling (GO:0036150)	2
GO_Biological_Process_2018	phosphatidylcholine metabolic process (GO:0046470)	2
GO_Biological_Process_2018	phosphatidylglycerol metabolic process (GO:0046471)	2
GO_Biological_Process_2018	organonitrogen compound biosynthetic process (GO:1901566)	2
GO_Biological_Process_2018	phosphatidylinositol acyl-chain remodeling (GO:0036149)	2
GO_Biological_Process_2018	positive regulation of macromolecule biosynthetic process (GO:0010557)	2
GO_Biological_Process_2018	negative regulation of protein binding (GO:0032091)	2
GO_Biological_Process_2018	chaperone-mediated protein transport (GO:0072321)	2
GO_Biological_Process_2018	glucosamine-containing compound catabolic process (GO:1901072)	2
GO_Biological_Process_2018	glutathione metabolic process (GO:0006749)	2
GO_Biological_Process_2018	heart development (GO:0007507)	2
GO_Biological_Process_2018	interleukin-17-mediated signaling pathway (GO:0097400)	2
GO_Biological_Process_2018	cellular response to interleukin-17 (GO:0097398)	2
GO_Biological_Process_2018	sulfur compound biosynthetic process (GO:0044272)	2
GO_Biological_Process_2018	smooth muscle cell differentiation (GO:0051145)	2
GO_Biological_Process_2018	glutathione derivative biosynthetic process (GO:1901687)	2
GO_Biological_Process_2018	glutathione derivative metabolic process (GO:1901685)	2
GO_Biological_Process_2018	TORC1 signaling (GO:0038202)	2
GO_Biological_Process_2018	cell junction maintenance (GO:0034331)	2
GO_Biological_Process_2018	regulation of Wnt signaling pathway (GO:0030111)	2
GO_Biological_Process_2018	positive regulation of acrosome reaction (GO:2000344)	2
GO_Biological_Process_2018	sister chromatid segregation (GO:0000819)	2
GO_Biological_Process_2018	regulation of transcription from RNA polymerase I promoter (GO:0006356)	2
GO_Biological_Process_2018	microtubule polymerization (GO:0046785)	2
GO_Biological_Process_2018	cell differentiation in hindbrain (GO:0021533)	2
GO_Biological_Process_2018	regulation of systemic arterial blood pressure by renin-angiotensin (GO:0003081)	2
GO_Biological_Process_2018	mRNA cleavage involved in mRNA processing (GO:0098787)	2
GO_Biological_Process_2018	histone H2A ubiquitination (GO:0033522)	2
GO_Biological_Process_2018	histone H2A monoubiquitination (GO:0035518)	2
GO_Biological_Process_2018	regulation of vesicle fusion (GO:0031338)	2
GO_Biological_Process_2018	spermine metabolic process (GO:0008215)	2
GO_Biological_Process_2018	negative regulation of G2/M transition of mitotic cell cycle (GO:0010972)	2
GO_Biological_Process_2018	ncRNA 3'-end processing (GO:0043628)	2
GO_Biological_Process_2018	JAK-STAT cascade involved in growth hormone signaling pathway (GO:0060397)	2
GO_Biological_Process_2018	pre-mRNA cleavage required for polyadenylation (GO:0098789)	2
GO_Biological_Process_2018	positive regulation of NF-kappaB transcription factor activity (GO:0051092)	2
GO_Biological_Process_2018	cell junction assembly (GO:0034329)	2
GO_Biological_Process_2018	regulation of protein catabolic process (GO:0042176)	2
GO_Biological_Process_2018	protein import (GO:0017038)	2
GO_Biological_Process_2018	activation of GTPase activity (GO:0090630)	2
GO_Biological_Process_2018	regulation of viral entry into host cell (GO:0046596)	2
GO_Biological_Process_2018	viral process (GO:0016032)	2
GO_Biological_Process_2018	glycerophospholipid biosynthetic process (GO:0046474)	2
GO_Biological_Process_2018	regulation of calcium ion-dependent exocytosis (GO:0017158)	2
GO_Biological_Process_2018	viral translation (GO:0019081)	2
GO_Biological_Process_2018	superoxide anion generation (GO:0042554)	2
GO_Biological_Process_2018	regulation of isotype switching (GO:0045191)	2
GO_Biological_Process_2018	formation of translation preinitiation complex (GO:0001731)	2
GO_Biological_Process_2018	protection from non-homologous end joining at telomere (GO:0031848)	2
GO_Biological_Process_2018	regulation of activation of Janus kinase activity (GO:0010533)	2
GO_Biological_Process_2018	response to increased oxygen levels (GO:0036296)	2
GO_Biological_Process_2018	establishment of protein localization to organelle (GO:0072594)	2
GO_Biological_Process_2018	sulfur compound catabolic process (GO:0044273)	2
GO_Biological_Process_2018	negative regulation of B cell activation (GO:0050869)	2
GO_Biological_Process_2018	regulation of exocytosis (GO:0017157)	2
GO_Biological_Process_2018	Wnt signaling pathway, planar cell polarity pathway (GO:0060071)	2
GO_Biological_Process_2018	sulfate transport (GO:0008272)	2
GO_Biological_Process_2018	inorganic anion transmembrane transport (GO:0098661)	2
GO_Biological_Process_2018	positive regulation of cytoskeleton organization (GO:0051495)	2
GO_Biological_Process_2018	chloride transport (GO:0006821)	2
GO_Biological_Process_2018	positive regulation of actin filament polymerization (GO:0030838)	2
GO_Biological_Process_2018	regulation of viral genome replication (GO:0045069)	2
GO_Biological_Process_2018	negative regulation of viral genome replication (GO:0045071)	2
GO_Biological_Process_2018	positive regulation of STAT cascade (GO:1904894)	2
GO_Biological_Process_2018	semaphorin-plexin signaling pathway (GO:0071526)	2
GO_Biological_Process_2018	regulation of pH (GO:0006885)	2
GO_Biological_Process_2018	oxalate transport (GO:0019532)	2
GO_Biological_Process_2018	septin ring assembly (GO:0000921)	2
GO_Biological_Process_2018	regulation of fatty acid oxidation (GO:0046320)	2
GO_Biological_Process_2018	negative regulation of cellular senescence (GO:2000773)	2
GO_Biological_Process_2018	negative regulation of viral life cycle (GO:1903901)	2
GO_Biological_Process_2018	positive regulation of protein polymerization (GO:0032273)	2
GO_Biological_Process_2018	regulation of bone remodeling (GO:0046850)	2
GO_Biological_Process_2018	septin ring organization (GO:0031106)	2
GO_Biological_Process_2018	positive regulation of filopodium assembly (GO:0051491)	2
GO_Biological_Process_2018	inorganic cation import across plasma membrane (GO:0098659)	2
GO_Biological_Process_2018	cellular response to insulin stimulus (GO:0032869)	2
GO_Biological_Process_2018	negative regulation of cell aging (GO:0090344)	2
GO_Biological_Process_2018	vesicle-mediated transport between endosomal compartments (GO:0098927)	2
GO_Biological_Process_2018	adenylate cyclase-modulating G-protein coupled receptor signaling pathway (GO:0007188)	2
GO_Biological_Process_2018	biomineral tissue development (GO:0031214)	2
GO_Biological_Process_2018	peroxisomal transport (GO:0043574)	2
GO_Biological_Process_2018	membrane depolarization during action potential (GO:0086010)	2
GO_Biological_Process_2018	membrane depolarization (GO:0051899)	2
GO_Biological_Process_2018	regulation of stress fiber assembly (GO:0051492)	2
GO_Biological_Process_2018	endosomal vesicle fusion (GO:0034058)	2
GO_Biological_Process_2018	regulation of autophagy of mitochondrion (GO:1903146)	2
GO_Biological_Process_2018	digestive tract development (GO:0048565)	2
GO_Biological_Process_2018	replicative senescence (GO:0090399)	2
GO_Biological_Process_2018	calcium ion regulated exocytosis (GO:0017156)	2
GO_Biological_Process_2018	icosanoid secretion (GO:0032309)	2
GO_Biological_Process_2018	regulation of autophagosome maturation (GO:1901096)	2
GO_Biological_Process_2018	phagosome maturation (GO:0090382)	2
GO_Biological_Process_2018	positive regulation of TOR signaling (GO:0032008)	2
GO_Biological_Process_2018	adenylate cyclase-inhibiting G-protein coupled acetylcholine receptor signaling pathway (GO:0007197)	2
GO_Biological_Process_2018	positive regulation of cell-substrate adhesion (GO:0010811)	2
GO_Biological_Process_2018	negative regulation of cell cycle G2/M phase transition (GO:1902750)	2
GO_Biological_Process_2018	response to muramyl dipeptide (GO:0032495)	2
GO_Biological_Process_2018	serine family amino acid metabolic process (GO:0009069)	2
GO_Biological_Process_2018	anion transmembrane transport (GO:0098656)	2
GO_Biological_Process_2018	fructose metabolic process (GO:0006000)	2
GO_Biological_Process_2018	adult heart development (GO:0007512)	2
GO_Biological_Process_2018	positive regulation of striated muscle cell differentiation (GO:0051155)	2
GO_Biological_Process_2018	glucose metabolic process (GO:0006006)	2
GO_Biological_Process_2018	pyruvate metabolic process (GO:0006090)	2
GO_Biological_Process_2018	oxoacid metabolic process (GO:0043436)	2
GO_Biological_Process_2018	purine ribonucleoside bisphosphate metabolic process (GO:0034035)	2
GO_Biological_Process_2018	leukotriene metabolic process (GO:0006691)	2
GO_Biological_Process_2018	pyrimidine nucleoside catabolic process (GO:0046135)	2
GO_Biological_Process_2018	phosphatidylethanolamine acyl-chain remodeling (GO:0036152)	2
GO_Biological_Process_2018	telomere maintenance (GO:0000723)	2
GO_Biological_Process_2018	hexose transport (GO:0008645)	2
GO_Biological_Process_2018	DNA damage response, signal transduction resulting in transcription (GO:0042772)	2
GO_Biological_Process_2018	regulation of signal transduction by p53 class mediator (GO:1901796)	2
GO_Biological_Process_2018	negative regulation of viral process (GO:0048525)	2
GO_Biological_Process_2018	DNA damage response, signal transduction by p53 class mediator resulting in transcription of p21 class mediator (GO:0006978)	2
GO_Biological_Process_2018	regulation of macroautophagy (GO:0016241)	2
GO_Biological_Process_2018	negative regulation of endocytosis (GO:0045806)	1
GO_Biological_Process_2018	negative regulation of endothelial cell proliferation (GO:0001937)	1
GO_Biological_Process_2018	cofactor transport (GO:0051181)	1
GO_Biological_Process_2018	positive regulation of binding (GO:0051099)	1
GO_Biological_Process_2018	regulation of cholesterol efflux (GO:0010874)	1
GO_Biological_Process_2018	regulation of cell communication by electrical coupling involved in cardiac conduction (GO:1901844)	1
GO_Biological_Process_2018	positive regulation of heart contraction (GO:0045823)	1
GO_Biological_Process_2018	regulation of dendritic spine development (GO:0060998)	1
GO_Biological_Process_2018	positive regulation of protein dephosphorylation (GO:0035307)	1
GO_Biological_Process_2018	positive regulation of phosphoprotein phosphatase activity (GO:0032516)	1
GO_Biological_Process_2018	membrane raft organization (GO:0031579)	1
GO_Biological_Process_2018	regulation of actin filament length (GO:0030832)	1
GO_Biological_Process_2018	astrocyte development (GO:0014002)	1
GO_Biological_Process_2018	regulation of cardiac muscle contraction by calcium ion signaling (GO:0010882)	1
GO_Biological_Process_2018	positive regulation of protein binding (GO:0032092)	1
GO_Biological_Process_2018	regulation of protein dephosphorylation (GO:0035304)	1
GO_Biological_Process_2018	negative regulation of cholesterol storage (GO:0010887)	1
GO_Biological_Process_2018	smooth muscle tissue development (GO:0048745)	1
GO_Biological_Process_2018	positive regulation of cardiac muscle contraction (GO:0060452)	1
GO_Biological_Process_2018	negative regulation of cellular response to hypoxia (GO:1900038)	1
GO_Biological_Process_2018	regulation of skeletal muscle contraction (GO:0014819)	1
GO_Biological_Process_2018	regulation of endothelial cell migration (GO:0010594)	1
GO_Biological_Process_2018	brain morphogenesis (GO:0048854)	1
GO_Biological_Process_2018	regulation of mRNA polyadenylation (GO:1900363)	1
GO_Biological_Process_2018	regulation of cardiac muscle contraction (GO:0055117)	1
GO_Biological_Process_2018	negative regulation of dephosphorylation (GO:0035305)	1
GO_Biological_Process_2018	regulation of Rho protein signal transduction (GO:0035023)	1
GO_Biological_Process_2018	regulation of neuron death (GO:1901214)	1
GO_Biological_Process_2018	cell wall macromolecule catabolic process (GO:0016998)	1
GO_Biological_Process_2018	regulation of cell communication by electrical coupling (GO:0010649)	1
GO_Biological_Process_2018	negative regulation of interleukin-1 secretion (GO:0050711)	1
GO_Biological_Process_2018	positive regulation of vascular endothelial growth factor receptor signaling pathway (GO:0030949)	1
GO_Biological_Process_2018	intracellular sterol transport (GO:0032366)	1
GO_Biological_Process_2018	negative regulation of nitrogen compound metabolic process (GO:0051172)	1
GO_Biological_Process_2018	pharyngeal arch artery morphogenesis (GO:0061626)	1
GO_Biological_Process_2018	chylomicron remnant clearance (GO:0034382)	1
GO_Biological_Process_2018	regulation of Cdc42 protein signal transduction (GO:0032489)	1
GO_Biological_Process_2018	negative regulation of developmental growth (GO:0048640)	1
GO_Biological_Process_2018	positive regulation of cyclic nucleotide biosynthetic process (GO:0030804)	1
GO_Biological_Process_2018	negative regulation of epithelial cell proliferation (GO:0050680)	1
GO_Biological_Process_2018	cellular response to vascular endothelial growth factor stimulus (GO:0035924)	1
GO_Biological_Process_2018	membrane lipid biosynthetic process (GO:0046467)	1
GO_Biological_Process_2018	positive regulation of cholesterol efflux (GO:0010875)	1
GO_Biological_Process_2018	leukocyte differentiation (GO:0002521)	1
GO_Biological_Process_2018	regulation of endothelial cell chemotaxis (GO:2001026)	1
GO_Biological_Process_2018	cyclic-nucleotide-mediated signaling (GO:0019935)	1
GO_Biological_Process_2018	neuron differentiation (GO:0030182)	1
GO_Biological_Process_2018	lipoprotein transport (GO:0042953)	1
GO_Biological_Process_2018	integrin activation (GO:0033622)	1
GO_Biological_Process_2018	positive regulation of ryanodine-sensitive calcium-release channel activity (GO:0060316)	1
GO_Biological_Process_2018	positive regulation of catenin import into nucleus (GO:0035413)	1
GO_Biological_Process_2018	negative regulation of mRNA polyadenylation (GO:1900364)	1
GO_Biological_Process_2018	peripheral nervous system axon ensheathment (GO:0032292)	1
GO_Biological_Process_2018	lipoprotein localization (GO:0044872)	1
GO_Biological_Process_2018	negative regulation of monooxygenase activity (GO:0032769)	1
GO_Biological_Process_2018	excitatory synapse assembly (GO:1904861)	1
GO_Biological_Process_2018	Schwann cell development (GO:0014044)	1
GO_Biological_Process_2018	regulation of lipid metabolic process (GO:0019216)	1
GO_Biological_Process_2018	regulation of supramolecular fiber organization (GO:1902903)	1
GO_Biological_Process_2018	positive regulation of organelle assembly (GO:1902117)	1
GO_Biological_Process_2018	second-messenger-mediated signaling (GO:0019932)	1
GO_Biological_Process_2018	positive regulation of cysteine-type endopeptidase activity involved in apoptotic process (GO:0043280)	1
GO_Biological_Process_2018	positive regulation of dendritic spine development (GO:0060999)	1
GO_Biological_Process_2018	negative regulation of actin filament bundle assembly (GO:0032232)	1
GO_Biological_Process_2018	dopaminergic neuron differentiation (GO:0071542)	1
GO_Biological_Process_2018	negative regulation of receptor-mediated endocytosis (GO:0048261)	1
GO_Biological_Process_2018	negative regulation of interleukin-1 beta production (GO:0032691)	1
GO_Biological_Process_2018	transcription initiation from RNA polymerase II promoter (GO:0006367)	1
GO_Biological_Process_2018	regulation of interleukin-8 production (GO:0032677)	1
GO_Biological_Process_2018	activation of cysteine-type endopeptidase activity involved in apoptotic process (GO:0006919)	1
GO_Biological_Process_2018	pyroptosis (GO:0070269)	1
GO_Biological_Process_2018	positive regulation of glycoprotein biosynthetic process (GO:0010560)	1
GO_Biological_Process_2018	immunological synapse formation (GO:0001771)	1
GO_Biological_Process_2018	positive regulation of lymphocyte migration (GO:2000403)	1
GO_Biological_Process_2018	cytoskeleton organization (GO:0007010)	1
GO_Biological_Process_2018	positive regulation of chromatin silencing (GO:0031937)	1
GO_Biological_Process_2018	positive regulation of lyase activity (GO:0051349)	1
GO_Biological_Process_2018	cellular glucuronidation (GO:0052695)	1
GO_Biological_Process_2018	regulation of lymphocyte activation (GO:0051249)	1
GO_Biological_Process_2018	myelin assembly (GO:0032288)	1
GO_Biological_Process_2018	nuclear envelope reassembly (GO:0031468)	1
GO_Biological_Process_2018	regulation of ion homeostasis (GO:2000021)	1
GO_Biological_Process_2018	glucuronate metabolic process (GO:0019585)	1
GO_Biological_Process_2018	morphogenesis of an epithelium (GO:0002009)	1
GO_Biological_Process_2018	response to organic cyclic compound (GO:0014070)	1
GO_Biological_Process_2018	mitotic nuclear envelope reassembly (GO:0007084)	1
GO_Biological_Process_2018	regulation of dendritic cell apoptotic process (GO:2000668)	1
GO_Biological_Process_2018	negative regulation of type I interferon-mediated signaling pathway (GO:0060339)	1
GO_Biological_Process_2018	regulation of glial cell differentiation (GO:0045685)	1
GO_Biological_Process_2018	white fat cell differentiation (GO:0050872)	1
GO_Biological_Process_2018	gland morphogenesis (GO:0022612)	1
GO_Biological_Process_2018	positive regulation of antigen processing and presentation (GO:0002579)	1
GO_Biological_Process_2018	cellular response to magnesium ion (GO:0071286)	1
GO_Biological_Process_2018	positive regulation of dendritic cell antigen processing and presentation (GO:0002606)	1
GO_Biological_Process_2018	single strand break repair (GO:0000012)	1
GO_Biological_Process_2018	response to alcohol (GO:0097305)	1
GO_Biological_Process_2018	positive regulation of peptidyl-threonine phosphorylation (GO:0010800)	1
GO_Biological_Process_2018	sodium ion transmembrane transport (GO:0035725)	1
GO_Biological_Process_2018	regulation of cell division (GO:0051302)	1
GO_Biological_Process_2018	T cell proliferation (GO:0042098)	1
GO_Biological_Process_2018	low-density lipoprotein receptor particle metabolic process (GO:0032799)	1
GO_Biological_Process_2018	negative regulation of cytokine biosynthetic process (GO:0042036)	1
GO_Biological_Process_2018	protein-DNA complex disassembly (GO:0032986)	1
GO_Biological_Process_2018	positive regulation of cardiac muscle hypertrophy (GO:0010613)	1
GO_Biological_Process_2018	positive regulation of cyclic nucleotide metabolic process (GO:0030801)	1
GO_Biological_Process_2018	dendritic cell chemotaxis (GO:0002407)	1
GO_Biological_Process_2018	amino acid transmembrane transport (GO:0003333)	1
GO_Biological_Process_2018	anterograde trans-synaptic signaling (GO:0098916)	1
GO_Biological_Process_2018	amino acid transport (GO:0006865)	1
GO_Biological_Process_2018	toll-like receptor 9 signaling pathway (GO:0034162)	1
GO_Biological_Process_2018	neutral amino acid transport (GO:0015804)	1
GO_Biological_Process_2018	toll-like receptor signaling pathway (GO:0002224)	1
GO_Biological_Process_2018	alanine transport (GO:0032328)	1
GO_Biological_Process_2018	positive regulation of production of molecular mediator of immune response (GO:0002702)	1
GO_Biological_Process_2018	detection of mechanical stimulus involved in sensory perception (GO:0050974)	1
GO_Biological_Process_2018	L-alanine transport (GO:0015808)	1
GO_Biological_Process_2018	negative regulation of necrotic cell death (GO:0060547)	1
GO_Biological_Process_2018	carboxylic acid transport (GO:0046942)	1
GO_Biological_Process_2018	homophilic cell adhesion via plasma membrane adhesion molecules (GO:0007156)	1
GO_Biological_Process_2018	negative regulation of cell projection organization (GO:0031345)	1
GO_Biological_Process_2018	positive regulation of B cell proliferation (GO:0030890)	1
GO_Biological_Process_2018	I-kappaB kinase/NF-kappaB signaling (GO:0007249)	1
GO_Biological_Process_2018	organic anion transport (GO:0015711)	1
GO_Biological_Process_2018	cell migration involved in heart development (GO:0060973)	1
GO_Biological_Process_2018	B cell mediated immunity (GO:0019724)	1
GO_Biological_Process_2018	positive regulation of DNA damage response, signal transduction by p53 class mediator (GO:0043517)	1
GO_Biological_Process_2018	negative regulation of JAK-STAT cascade (GO:0046426)	1
GO_Biological_Process_2018	regulation of neuron projection development (GO:0010975)	1
GO_Biological_Process_2018	pattern recognition receptor signaling pathway (GO:0002221)	1
GO_Biological_Process_2018	positive regulation of cytokine production involved in immune response (GO:0002720)	1
GO_Biological_Process_2018	positive regulation of aspartic-type peptidase activity (GO:1905247)	1
GO_Biological_Process_2018	negative regulation of DNA repair (GO:0045738)	1
GO_Biological_Process_2018	positive regulation of intracellular estrogen receptor signaling pathway (GO:0033148)	1
GO_Biological_Process_2018	positive regulation of aspartic-type endopeptidase activity involved in amyloid precursor protein catabolic process (GO:1902961)	1
GO_Biological_Process_2018	negative regulation of catecholamine secretion (GO:0033604)	1
GO_Biological_Process_2018	negative regulation of digestive system process (GO:0060457)	1
GO_Biological_Process_2018	embryonic forelimb morphogenesis (GO:0035115)	1
GO_Biological_Process_2018	sphingoid biosynthetic process (GO:0046520)	1
GO_Biological_Process_2018	proline transport (GO:0015824)	1
GO_Biological_Process_2018	positive regulation of interferon-beta production (GO:0032728)	1
GO_Biological_Process_2018	neuropeptide signaling pathway (GO:0007218)	1
GO_Biological_Process_2018	DNA double-strand break processing (GO:0000729)	1
GO_Biological_Process_2018	cation transport (GO:0006812)	1
GO_Biological_Process_2018	membrane assembly (GO:0071709)	1
GO_Biological_Process_2018	cardiolipin metabolic process (GO:0032048)	1
GO_Biological_Process_2018	cranial nerve development (GO:0021545)	1
GO_Biological_Process_2018	secretion (GO:0046903)	1
GO_Biological_Process_2018	regulation of T cell cytokine production (GO:0002724)	1
GO_Biological_Process_2018	glomerular visceral epithelial cell differentiation (GO:0072112)	1
GO_Biological_Process_2018	canonical Wnt signaling pathway (GO:0060070)	1
GO_Biological_Process_2018	regulation of peptide hormone secretion (GO:0090276)	1
GO_Biological_Process_2018	dorsal/ventral axis specification (GO:0009950)	1
GO_Biological_Process_2018	forelimb morphogenesis (GO:0035136)	1
GO_Biological_Process_2018	adrenal gland development (GO:0030325)	1
GO_Biological_Process_2018	phosphatidylglycerol biosynthetic process (GO:0006655)	1
GO_Biological_Process_2018	positive regulation of glial cell differentiation (GO:0045687)	1
GO_Biological_Process_2018	cellular response to acid chemical (GO:0071229)	1
GO_Biological_Process_2018	regulation of mitochondrial membrane permeability involved in apoptotic process (GO:1902108)	1
GO_Biological_Process_2018	pri-miRNA transcription from RNA polymerase II promoter (GO:0061614)	1
GO_Biological_Process_2018	positive regulation of membrane depolarization (GO:1904181)	1
GO_Biological_Process_2018	cardiac muscle cell-cardiac muscle cell adhesion (GO:0086042)	1
GO_Biological_Process_2018	negative regulation of stress fiber assembly (GO:0051497)	1
GO_Biological_Process_2018	regulation of tyrosine phosphorylation of STAT protein (GO:0042509)	1
GO_Biological_Process_2018	non-motile cilium assembly (GO:1905515)	1
GO_Biological_Process_2018	regulation of interleukin-2 production (GO:0032663)	1
GO_Biological_Process_2018	hepaticobiliary system development (GO:0061008)	1
GO_Biological_Process_2018	positive regulation of neuron projection development (GO:0010976)	1
GO_Biological_Process_2018	positive regulation of transcription from RNA polymerase II promoter (GO:0045944)	1
GO_Biological_Process_2018	spliceosomal snRNP assembly (GO:0000387)	1
GO_Biological_Process_2018	positive regulation of organelle organization (GO:0010638)	1
GO_Biological_Process_2018	piRNA metabolic process (GO:0034587)	1
GO_Biological_Process_2018	regulation of ion transmembrane transporter activity (GO:0032412)	1
GO_Biological_Process_2018	rRNA base methylation (GO:0070475)	1
GO_Biological_Process_2018	response to axon injury (GO:0048678)	1
GO_Biological_Process_2018	negative regulation of chemotaxis (GO:0050922)	1
GO_Biological_Process_2018	carnitine metabolic process (GO:0009437)	1
GO_Biological_Process_2018	regulation of ventricular cardiac muscle cell action potential (GO:0098911)	1
GO_Biological_Process_2018	positive regulation of chemokine production (GO:0032722)	1
GO_Biological_Process_2018	cation transmembrane transport (GO:0098655)	1
GO_Biological_Process_2018	monovalent inorganic cation transport (GO:0015672)	1
GO_Biological_Process_2018	regulation of peptidyl-serine phosphorylation (GO:0033135)	1
GO_Biological_Process_2018	coenzyme metabolic process (GO:0006732)	1
GO_Biological_Process_2018	peptidyl-cysteine modification (GO:0018198)	1
GO_Biological_Process_2018	positive regulation of interleukin-8 biosynthetic process (GO:0045416)	1
GO_Biological_Process_2018	cardiolipin biosynthetic process (GO:0032049)	1
GO_Biological_Process_2018	bundle of His cell to Purkinje myocyte communication (GO:0086069)	1
GO_Biological_Process_2018	diol biosynthetic process (GO:0034312)	1
GO_Biological_Process_2018	regulation of aspartic-type endopeptidase activity involved in amyloid precursor protein catabolic process (GO:1902959)	1
GO_Biological_Process_2018	sphingosine biosynthetic process (GO:0046512)	1
GO_Biological_Process_2018	glomerular visceral epithelial cell development (GO:0072015)	1
GO_Biological_Process_2018	regulation of histone H4 acetylation (GO:0090239)	1
GO_Biological_Process_2018	positive regulation of viral release from host cell (GO:1902188)	1
GO_Biological_Process_2018	regulation of mast cell degranulation (GO:0043304)	1
GO_Biological_Process_2018	mRNA splicing, via spliceosome (GO:0000398)	1
GO_Biological_Process_2018	positive regulation of adherens junction organization (GO:1903393)	1
GO_Biological_Process_2018	metal ion transport (GO:0030001)	1
GO_Biological_Process_2018	erythrocyte development (GO:0048821)	1
GO_Biological_Process_2018	receptor clustering (GO:0043113)	1
GO_Biological_Process_2018	synaptic transmission, GABAergic (GO:0051932)	1
GO_Biological_Process_2018	clathrin-dependent endocytosis (GO:0072583)	1
GO_Biological_Process_2018	protein localization to endoplasmic reticulum exit site (GO:0070973)	1
GO_Biological_Process_2018	negative regulation of glial cell proliferation (GO:0060253)	1
GO_Biological_Process_2018	regulation of sarcomere organization (GO:0060297)	1
GO_Biological_Process_2018	negative regulation of leukocyte apoptotic process (GO:2000107)	1
GO_Biological_Process_2018	regulation of retrograde protein transport, ER to cytosol (GO:1904152)	1
GO_Biological_Process_2018	negative regulation of catalytic activity (GO:0043086)	1
GO_Biological_Process_2018	regulation of G1/S transition of mitotic cell cycle (GO:2000045)	1
GO_Biological_Process_2018	positive regulation of ubiquitin-protein transferase activity (GO:0051443)	1
GO_Biological_Process_2018	B cell activation involved in immune response (GO:0002312)	1
GO_Biological_Process_2018	semaphorin-plexin signaling pathway involved in neuron projection guidance (GO:1902285)	1
GO_Biological_Process_2018	cellular defense response (GO:0006968)	1
GO_Biological_Process_2018	negative regulation of stem cell differentiation (GO:2000737)	1
GO_Biological_Process_2018	cellular response to interferon-alpha (GO:0035457)	1
GO_Biological_Process_2018	neurotransmitter receptor transport, postsynaptic endosome to lysosome (GO:0098943)	1
GO_Biological_Process_2018	regulation of potassium ion transmembrane transport (GO:1901379)	1
GO_Biological_Process_2018	aminoglycan biosynthetic process (GO:0006023)	1
GO_Biological_Process_2018	regulation of hemopoiesis (GO:1903706)	1
GO_Biological_Process_2018	UDP-N-acetylglucosamine biosynthetic process (GO:0006048)	1
GO_Biological_Process_2018	isotype switching (GO:0045190)	1
GO_Biological_Process_2018	positive regulation of cell development (GO:0010720)	1
GO_Biological_Process_2018	regulation of DNA methylation (GO:0044030)	1
GO_Biological_Process_2018	acylglycerol acyl-chain remodeling (GO:0036155)	1
GO_Biological_Process_2018	positive regulation of TORC1 signaling (GO:1904263)	1
GO_Biological_Process_2018	positive regulation of peptidyl-lysine acetylation (GO:2000758)	1
GO_Biological_Process_2018	regulation of G0 to G1 transition (GO:0070316)	1
GO_Biological_Process_2018	positive regulation of mononuclear cell migration (GO:0071677)	1
GO_Biological_Process_2018	positive regulation of monocyte chemotaxis (GO:0090026)	1
GO_Biological_Process_2018	mitotic nuclear envelope disassembly (GO:0007077)	1
GO_Biological_Process_2018	purine ribonucleoside monophosphate metabolic process (GO:0009167)	1
GO_Biological_Process_2018	nucleobase-containing small molecule catabolic process (GO:0034656)	1
GO_Biological_Process_2018	nuclear envelope disassembly (GO:0051081)	1
GO_Biological_Process_2018	peptidyl-lysine methylation (GO:0018022)	1
GO_Biological_Process_2018	cellular response to UV-B (GO:0071493)	1
GO_Biological_Process_2018	negative regulation of cell development (GO:0010721)	1
GO_Biological_Process_2018	transcription from RNA polymerase III promoter (GO:0006383)	1
GO_Biological_Process_2018	regulation of monocyte chemotaxis (GO:0090025)	1
GO_Biological_Process_2018	cellular response to UV (GO:0034644)	1
GO_Biological_Process_2018	response to UV-B (GO:0010224)	1
GO_Biological_Process_2018	acute inflammatory response (GO:0002526)	1
GO_Biological_Process_2018	regulation of monooxygenase activity (GO:0032768)	1
GO_Biological_Process_2018	positive regulation of cell junction assembly (GO:1901890)	1
GO_Biological_Process_2018	regulation of chromosome segregation (GO:0051983)	1
GO_Biological_Process_2018	negative regulation by host of viral process (GO:0044793)	1
GO_Biological_Process_2018	regulation of vascular smooth muscle cell proliferation (GO:1904705)	1
GO_Biological_Process_2018	lipoxin biosynthetic process (GO:2001301)	1
GO_Biological_Process_2018	aortic valve development (GO:0003176)	1
GO_Biological_Process_2018	lymphoid progenitor cell differentiation (GO:0002320)	1
GO_Biological_Process_2018	aortic valve morphogenesis (GO:0003180)	1
GO_Biological_Process_2018	succinyl-CoA metabolic process (GO:0006104)	1
GO_Biological_Process_2018	sensory perception (GO:0007600)	1
GO_Biological_Process_2018	organelle disassembly (GO:1903008)	1
GO_Biological_Process_2018	positive regulation of T cell migration (GO:2000406)	1
GO_Biological_Process_2018	mitochondrial respiratory chain complex IV assembly (GO:0033617)	1
GO_Biological_Process_2018	cellular sodium ion homeostasis (GO:0006883)	1
GO_Biological_Process_2018	regulation of carbohydrate catabolic process (GO:0043470)	1
GO_Biological_Process_2018	positive regulation of leukocyte chemotaxis (GO:0002690)	1
GO_Biological_Process_2018	nucleobase-containing compound catabolic process (GO:0034655)	1
GO_Biological_Process_2018	mitochondrial respiratory chain complex IV biogenesis (GO:0097034)	1
GO_Biological_Process_2018	regulation of RNA polymerase II transcriptional preinitiation complex assembly (GO:0045898)	1
GO_Biological_Process_2018	postsynaptic membrane organization (GO:0001941)	1
GO_Biological_Process_2018	tRNA-containing ribonucleoprotein complex export from nucleus (GO:0071431)	1
GO_Biological_Process_2018	regulation of cell-substrate adhesion (GO:0010810)	1
GO_Biological_Process_2018	tRNA export from nucleus (GO:0006409)	1
GO_Biological_Process_2018	regulation of Notch signaling pathway (GO:0008593)	1
GO_Biological_Process_2018	regulation of coenzyme metabolic process (GO:0051196)	1
GO_Biological_Process_2018	ornithine transport (GO:0015822)	1
GO_Biological_Process_2018	regulation of toll-like receptor 9 signaling pathway (GO:0034163)	1
GO_Biological_Process_2018	peroxisome proliferator activated receptor signaling pathway (GO:0035357)	1
GO_Biological_Process_2018	positive regulation of inositol phosphate biosynthetic process (GO:0060732)	1
GO_Biological_Process_2018	tRNA transcription (GO:0009304)	1
GO_Biological_Process_2018	regulation of pinocytosis (GO:0048548)	1
GO_Biological_Process_2018	cellular response to platelet-derived growth factor stimulus (GO:0036120)	1
GO_Biological_Process_2018	regulation of tube diameter (GO:0035296)	1
GO_Biological_Process_2018	regulation of natural killer cell mediated cytotoxicity (GO:0042269)	1
GO_Biological_Process_2018	synaptic vesicle transport (GO:0048489)	1
GO_Biological_Process_2018	cellular monovalent inorganic cation homeostasis (GO:0030004)	1
GO_Biological_Process_2018	negative regulation of vascular smooth muscle cell proliferation (GO:1904706)	1
GO_Biological_Process_2018	purine nucleoside monophosphate biosynthetic process (GO:0009127)	1
GO_Biological_Process_2018	regulation of vascular endothelial cell proliferation (GO:1905562)	1
GO_Biological_Process_2018	dermatan sulfate biosynthetic process (GO:0030208)	1
GO_Biological_Process_2018	negative regulation of ATPase activity (GO:0032780)	1
GO_Biological_Process_2018	negative regulation of JUN kinase activity (GO:0043508)	1
GO_Biological_Process_2018	negative regulation of JNK cascade (GO:0046329)	1
GO_Biological_Process_2018	cardiocyte differentiation (GO:0035051)	1
GO_Biological_Process_2018	regulation of B cell apoptotic process (GO:0002902)	1
GO_Biological_Process_2018	response to catecholamine (GO:0071869)	1
GO_Biological_Process_2018	cellular response to monoamine stimulus (GO:0071868)	1
GO_Biological_Process_2018	regulation of response to biotic stimulus (GO:0002831)	1
GO_Biological_Process_2018	negative regulation of alpha-beta T cell activation (GO:0046636)	1
GO_Biological_Process_2018	negative regulation of B cell apoptotic process (GO:0002903)	1
GO_Biological_Process_2018	regulation of establishment of protein localization (GO:0070201)	1
GO_Biological_Process_2018	ribonucleoprotein complex assembly (GO:0022618)	1
GO_Biological_Process_2018	cellular response to hypoxia (GO:0071456)	1
GO_Biological_Process_2018	protein sumoylation (GO:0016925)	1
GO_Biological_Process_2018	endothelial cell differentiation (GO:0045446)	1
GO_Biological_Process_2018	response to iron ion (GO:0010039)	1
GO_Biological_Process_2018	striated muscle cell differentiation (GO:0051146)	1
GO_Biological_Process_2018	positive regulation of excitatory postsynaptic potential (GO:2000463)	1
GO_Biological_Process_2018	membrane fusion (GO:0061025)	1
GO_Biological_Process_2018	cellular response to purine-containing compound (GO:0071415)	1
GO_Biological_Process_2018	basement membrane organization (GO:0071711)	1
GO_Biological_Process_2018	positive regulation of RNA polymerase II transcriptional preinitiation complex assembly (GO:0045899)	1
GO_Biological_Process_2018	oligosaccharide biosynthetic process (GO:0009312)	1
GO_Biological_Process_2018	intrinsic apoptotic signaling pathway in response to DNA damage (GO:0008630)	1
GO_Biological_Process_2018	thymus development (GO:0048538)	1
GO_Biological_Process_2018	oligodendrocyte differentiation (GO:0048709)	1
GO_Biological_Process_2018	regulation of JUN kinase activity (GO:0043506)	1
GO_Biological_Process_2018	cellular response to decreased oxygen levels (GO:0036294)	1
GO_Biological_Process_2018	protein localization to organelle (GO:0033365)	1
GO_Biological_Process_2018	regulation of mitotic spindle organization (GO:0060236)	1
GO_Biological_Process_2018	positive regulation of Wnt signaling pathway (GO:0030177)	1
GO_Biological_Process_2018	negative regulation of natural killer cell mediated cytotoxicity (GO:0045953)	1
GO_Biological_Process_2018	Cdc42 protein signal transduction (GO:0032488)	1
GO_Biological_Process_2018	regulation of striated muscle tissue development (GO:0016202)	1
GO_Biological_Process_2018	dynamin family protein polymerization involved in mitochondrial fission (GO:0003374)	1
GO_Biological_Process_2018	regulation of glycoprotein biosynthetic process (GO:0010559)	1
GO_Biological_Process_2018	dynamin family protein polymerization involved in membrane fission (GO:0003373)	1
GO_Biological_Process_2018	cardiac muscle cell differentiation (GO:0055007)	1
GO_Biological_Process_2018	presynapse assembly (GO:0099054)	1
GO_Biological_Process_2018	regulation of T cell mediated cytotoxicity (GO:0001914)	1
GO_Biological_Process_2018	regulation of branching involved in ureteric bud morphogenesis (GO:0090189)	1
GO_Biological_Process_2018	negative regulation of binding (GO:0051100)	1
GO_Biological_Process_2018	positive regulation of epithelial cell migration (GO:0010634)	1
GO_Biological_Process_2018	antigen processing and presentation of peptide antigen via MHC class I (GO:0002474)	1
GO_Biological_Process_2018	regulation of potassium ion transmembrane transporter activity (GO:1901016)	1
GO_Biological_Process_2018	response to unfolded protein (GO:0006986)	1
GO_Biological_Process_2018	interferon-gamma-mediated signaling pathway (GO:0060333)	1
GO_Biological_Process_2018	antigen processing and presentation of exogenous peptide antigen via MHC class I, TAP-independent (GO:0002480)	1
GO_Biological_Process_2018	positive regulation of urine volume (GO:0035810)	1
GO_Biological_Process_2018	cellular response to unfolded protein (GO:0034620)	1
GO_Biological_Process_2018	negative regulation of response to biotic stimulus (GO:0002832)	1
GO_Biological_Process_2018	regulation of urine volume (GO:0035809)	1
GO_Biological_Process_2018	receptor guanylyl cyclase signaling pathway (GO:0007168)	1
GO_Biological_Process_2018	positive regulation of response to endoplasmic reticulum stress (GO:1905898)	1
GO_Biological_Process_2018	organic cyclic compound biosynthetic process (GO:1901362)	1
GO_Biological_Process_2018	'de novo' posttranslational protein folding (GO:0051084)	1
GO_Biological_Process_2018	regulation of response to cytokine stimulus (GO:0060759)	1
GO_Biological_Process_2018	cellular response to topologically incorrect protein (GO:0035967)	1
GO_Biological_Process_2018	mitochondrial translational termination (GO:0070126)	1
GO_Biological_Process_2018	chaperone-mediated protein complex assembly (GO:0051131)	1
GO_Biological_Process_2018	positive regulation of neural precursor cell proliferation (GO:2000179)	1
GO_Biological_Process_2018	amyloid-beta metabolic process (GO:0050435)	1
GO_Biological_Process_2018	regulation of protein modification by small protein conjugation or removal (GO:1903320)	1
GO_Biological_Process_2018	negative regulation of defense response to virus (GO:0050687)	1
GO_Biological_Process_2018	chaperone mediated protein folding requiring cofactor (GO:0051085)	1
GO_Biological_Process_2018	mitochondrial ATP synthesis coupled proton transport (GO:0042776)	1
GO_Biological_Process_2018	positive regulation of phagocytosis (GO:0050766)	1
GO_Biological_Process_2018	mitochondrial translational elongation (GO:0070125)	1
GO_Biological_Process_2018	sterol metabolic process (GO:0016125)	1
GO_Biological_Process_2018	protein localization to plasma membrane (GO:0072659)	1
GO_Biological_Process_2018	hindlimb morphogenesis (GO:0035137)	1
GO_Biological_Process_2018	regulation of cardiac muscle hypertrophy in response to stress (GO:1903242)	1
GO_Biological_Process_2018	neuron remodeling (GO:0016322)	1
GO_Biological_Process_2018	positive regulation of podosome assembly (GO:0071803)	1
GO_Biological_Process_2018	protein K48-linked ubiquitination (GO:0070936)	1
GO_Biological_Process_2018	serine family amino acid biosynthetic process (GO:0009070)	1
GO_Biological_Process_2018	kinetochore organization (GO:0051383)	1
GO_Biological_Process_2018	endosome transport via multivesicular body sorting pathway (GO:0032509)	1
GO_Biological_Process_2018	neuron maturation (GO:0042551)	1
GO_Biological_Process_2018	regulation of rhodopsin mediated signaling pathway (GO:0022400)	1
GO_Biological_Process_2018	protein complex subunit organization (GO:0071822)	1
GO_Biological_Process_2018	osteoclast differentiation (GO:0030316)	1
GO_Biological_Process_2018	phosphatidylinositol 3-kinase signaling (GO:0014065)	1
GO_Biological_Process_2018	zinc II ion transmembrane transport (GO:0071577)	1
GO_Biological_Process_2018	ammonium transport (GO:0015696)	1
GO_Biological_Process_2018	endoplasmic reticulum to cytosol transport (GO:1903513)	1
GO_Biological_Process_2018	ruffle organization (GO:0031529)	1
GO_Biological_Process_2018	phospholipid transport (GO:0015914)	1
GO_Biological_Process_2018	translational termination (GO:0006415)	1
GO_Biological_Process_2018	cristae formation (GO:0042407)	1
GO_Biological_Process_2018	translational elongation (GO:0006414)	1
GO_Biological_Process_2018	regulation of execution phase of apoptosis (GO:1900117)	1
GO_Biological_Process_2018	membrane repolarization (GO:0086009)	1
GO_Biological_Process_2018	intrinsic apoptotic signaling pathway (GO:0097193)	1
GO_Biological_Process_2018	protein homooligomerization (GO:0051260)	1
GO_Biological_Process_2018	positive regulation of steroid metabolic process (GO:0045940)	1
GO_Biological_Process_2018	chylomicron assembly (GO:0034378)	1
GO_Biological_Process_2018	negative regulation of lipopolysaccharide-mediated signaling pathway (GO:0031665)	1
GO_Biological_Process_2018	regulation of neuroblast proliferation (GO:1902692)	1
GO_Biological_Process_2018	muscle cell migration (GO:0014812)	1
GO_Biological_Process_2018	membrane raft polarization (GO:0001766)	1
GO_Biological_Process_2018	phosphate ion transmembrane transport (GO:0035435)	1
GO_Biological_Process_2018	positive regulation of apoptotic cell clearance (GO:2000427)	1
GO_Biological_Process_2018	membrane raft distribution (GO:0031580)	1
GO_Biological_Process_2018	regulation of sterol transport (GO:0032371)	1
GO_Biological_Process_2018	positive regulation of mitotic sister chromatid separation (GO:1901970)	1
GO_Biological_Process_2018	positive regulation of neuroblast proliferation (GO:0002052)	1
GO_Biological_Process_2018	glyoxylate metabolic process (GO:0046487)	1
GO_Biological_Process_2018	positive regulation of metaphase/anaphase transition of cell cycle (GO:1902101)	1
GO_Biological_Process_2018	transcription elongation from RNA polymerase I promoter (GO:0006362)	1
GO_Biological_Process_2018	mitochondrial translation (GO:0032543)	1
GO_Biological_Process_2018	ceramide biosynthetic process (GO:0046513)	1
GO_Biological_Process_2018	organophosphate biosynthetic process (GO:0090407)	1
GO_Biological_Process_2018	microtubule cytoskeleton organization involved in mitosis (GO:1902850)	1
GO_Biological_Process_2018	negative regulation of cytokine secretion (GO:0050710)	1
GO_Biological_Process_2018	positive regulation of cytokine production (GO:0001819)	1
GO_Biological_Process_2018	protein localization to cell periphery (GO:1990778)	1
GO_Biological_Process_2018	regulation of defense response to virus (GO:0050688)	1
GO_Biological_Process_2018	protein oligomerization (GO:0051259)	1
GO_Biological_Process_2018	protein autoubiquitination (GO:0051865)	1
GO_Biological_Process_2018	vascular endothelial growth factor receptor signaling pathway (GO:0048010)	1
GO_Biological_Process_2018	negative regulation of multi-organism process (GO:0043901)	1
GO_Biological_Process_2018	epithelial cell differentiation (GO:0030855)	1
GO_Biological_Process_2018	regulation of lipopolysaccharide-mediated signaling pathway (GO:0031664)	1
GO_Biological_Process_2018	retrograde protein transport, ER to cytosol (GO:0030970)	1
GO_Biological_Process_2018	maintenance of protein localization in organelle (GO:0072595)	1
GO_Biological_Process_2018	nitric oxide biosynthetic process (GO:0006809)	1
GO_Biological_Process_2018	immune response-regulating cell surface receptor signaling pathway (GO:0002768)	1
GO_Biological_Process_2018	L-serine metabolic process (GO:0006563)	1
GO_Biological_Process_2018	membrane repolarization during action potential (GO:0086011)	1
GO_Biological_Process_2018	T cell activation (GO:0042110)	1
GO_Biological_Process_2018	DNA-templated transcription, termination (GO:0006353)	1
GO_Biological_Process_2018	wound healing (GO:0042060)	1
GO_Biological_Process_2018	regulation of DNA metabolic process (GO:0051052)	1
GO_Biological_Process_2018	positive regulation of insulin receptor signaling pathway (GO:0046628)	1
GO_Biological_Process_2018	tRNA methylation (GO:0030488)	1
GO_Biological_Process_2018	establishment of protein localization to mitochondrion (GO:0072655)	1
GO_Biological_Process_2018	regulation of response to stress (GO:0080134)	1
GO_Biological_Process_2018	skeletal muscle thin filament assembly (GO:0030240)	1
GO_Biological_Process_2018	chromatin silencing at telomere (GO:0006348)	1
GO_Biological_Process_2018	regulation of NAD(P)H oxidase activity (GO:0033860)	1
GO_Biological_Process_2018	UV-damage excision repair (GO:0070914)	1
GO_Biological_Process_2018	peptidyl-serine modification (GO:0018209)	1
GO_Biological_Process_2018	negative regulation of oxidative stress-induced cell death (GO:1903202)	1
GO_Biological_Process_2018	negative regulation of oxidative stress-induced intrinsic apoptotic signaling pathway (GO:1902176)	1
GO_Biological_Process_2018	peptidyl-serine phosphorylation (GO:0018105)	1
GO_Biological_Process_2018	cargo loading into COPII-coated vesicle (GO:0090110)	1
GO_Biological_Process_2018	regulation of sequestering of triglyceride (GO:0010889)	1
GO_Biological_Process_2018	skeletal myofibril assembly (GO:0014866)	1
GO_Biological_Process_2018	regulation of epithelial cell migration (GO:0010632)	1
GO_Biological_Process_2018	positive regulation of mitotic cell cycle spindle assembly checkpoint (GO:0090267)	1
GO_Biological_Process_2018	G-quadruplex DNA unwinding (GO:0044806)	1
GO_Biological_Process_2018	response to interferon-beta (GO:0035456)	1
GO_Biological_Process_2018	mitochondrial genome maintenance (GO:0000002)	1
GO_Biological_Process_2018	negative regulation of lipase activity (GO:0060192)	1
GO_Biological_Process_2018	positive regulation of spindle checkpoint (GO:0090232)	1
GO_Biological_Process_2018	regulation of MHC class II biosynthetic process (GO:0045346)	1
GO_Biological_Process_2018	regulation of peroxisome proliferator activated receptor signaling pathway (GO:0035358)	1
GO_Biological_Process_2018	protein dephosphorylation (GO:0006470)	1
GO_Biological_Process_2018	response to insulin (GO:0032868)	1
GO_Biological_Process_2018	negative regulation of lipid catabolic process (GO:0050995)	1
GO_Biological_Process_2018	positive regulation of cellular response to insulin stimulus (GO:1900078)	1
GO_Biological_Process_2018	positive regulation of alpha-beta T cell activation (GO:0046635)	1
GO_Biological_Process_2018	positive regulation of voltage-gated potassium channel activity (GO:1903818)	1
GO_Biological_Process_2018	epithelial cell apoptotic process (GO:1904019)	1
GO_Biological_Process_2018	anoikis (GO:0043276)	1
GO_Biological_Process_2018	neuron projection organization (GO:0106027)	1
GO_Biological_Process_2018	regulation of ER-associated ubiquitin-dependent protein catabolic process (GO:1903069)	1
GO_Biological_Process_2018	histone H3-K4 methylation (GO:0051568)	1
GO_Biological_Process_2018	regulation of signal transduction (GO:0009966)	1
GO_Biological_Process_2018	protein deacylation (GO:0035601)	1
GO_Biological_Process_2018	negative regulation of lipid storage (GO:0010888)	1
GO_Biological_Process_2018	positive regulation of DNA-templated transcription, elongation (GO:0032786)	1
GO_Biological_Process_2018	membrane protein intracellular domain proteolysis (GO:0031293)	1
GO_Biological_Process_2018	protein deacetylation (GO:0006476)	1
GO_Biological_Process_2018	regulation of chromatin organization (GO:1902275)	1
GO_Biological_Process_2018	regulation of fatty acid beta-oxidation (GO:0031998)	1
GO_Biological_Process_2018	negative regulation of endoplasmic reticulum unfolded protein response (GO:1900102)	1
GO_Biological_Process_2018	negative regulation of response to cytokine stimulus (GO:0060761)	1
GO_Biological_Process_2018	regulation of myeloid leukocyte differentiation (GO:0002761)	1
GO_Biological_Process_2018	energy coupled proton transmembrane transport, against electrochemical gradient (GO:0015988)	1
GO_Biological_Process_2018	positive regulation of signal transduction (GO:0009967)	1
GO_Biological_Process_2018	cardiac myofibril assembly (GO:0055003)	1
GO_Biological_Process_2018	negative regulation of interleukin-8 production (GO:0032717)	1
GO_Biological_Process_2018	negative regulation of reactive oxygen species metabolic process (GO:2000378)	1
GO_Biological_Process_2018	phospholipid catabolic process (GO:0009395)	1
GO_Biological_Process_2018	positive regulation of natural killer cell mediated immunity (GO:0002717)	1
GO_Biological_Process_2018	regulation of phagocytosis (GO:0050764)	1
GO_Biological_Process_2018	positive regulation of cellular catabolic process (GO:0031331)	1
GO_Biological_Process_2018	mRNA stabilization (GO:0048255)	1
GO_Biological_Process_2018	positive regulation of catalytic activity (GO:0043085)	1
GO_Biological_Process_2018	regulation of protein import into nucleus (GO:0042306)	1
GO_Biological_Process_2018	response to organonitrogen compound (GO:0010243)	1
GO_Biological_Process_2018	regulation of actin filament depolymerization (GO:0030834)	1
GO_Biological_Process_2018	circulatory system development (GO:0072359)	1
GO_Biological_Process_2018	negative regulation of keratinocyte differentiation (GO:0045617)	1
GO_Biological_Process_2018	regulation of wound healing (GO:0061041)	1
GO_Biological_Process_2018	negative regulation of epidermal cell differentiation (GO:0045605)	1
GO_Biological_Process_2018	regulation of delayed rectifier potassium channel activity (GO:1902259)	1
GO_Biological_Process_2018	regulation of centrosome duplication (GO:0010824)	1
GO_Biological_Process_2018	negative regulation of cellular response to transforming growth factor beta stimulus (GO:1903845)	1
GO_Biological_Process_2018	negative regulation of transforming growth factor beta receptor signaling pathway (GO:0030512)	1
GO_Biological_Process_2018	regulation of coagulation (GO:0050818)	1
GO_Biological_Process_2018	cartilage development (GO:0051216)	1
GO_Biological_Process_2018	positive regulation of actin filament depolymerization (GO:0030836)	1
GO_Biological_Process_2018	response to peptide (GO:1901652)	1
GO_Biological_Process_2018	cellular macromolecular complex assembly (GO:0034622)	1
GO_Biological_Process_2018	sulfur amino acid metabolic process (GO:0000096)	1
GO_Biological_Process_2018	triglyceride catabolic process (GO:0019433)	1
GO_Biological_Process_2018	regulation of transforming growth factor beta receptor signaling pathway (GO:0017015)	1
GO_Biological_Process_2018	transition metal ion homeostasis (GO:0055076)	1
GO_Biological_Process_2018	regulation of TOR signaling (GO:0032006)	1
GO_Biological_Process_2018	in utero embryonic development (GO:0001701)	1
GO_Biological_Process_2018	positive regulation of Rho protein signal transduction (GO:0035025)	1
GO_Biological_Process_2018	positive regulation of wound healing (GO:0090303)	1
GO_Biological_Process_2018	vesicle-mediated transport (GO:0016192)	1
GO_Biological_Process_2018	chordate embryonic development (GO:0043009)	1
GO_Biological_Process_2018	odontogenesis (GO:0042476)	1
GO_Biological_Process_2018	atrioventricular valve morphogenesis (GO:0003181)	1
GO_Biological_Process_2018	skeletal system development (GO:0001501)	1
GO_Biological_Process_2018	cellular response to calcium ion (GO:0071277)	1
GO_Biological_Process_2018	chondrocyte differentiation (GO:0002062)	1
GO_Biological_Process_2018	regulation of glomerular filtration (GO:0003093)	1
GO_Biological_Process_2018	positive regulation of RNA binding (GO:1905216)	1
GO_Biological_Process_2018	regulation of hydrogen peroxide metabolic process (GO:0010310)	1
GO_Biological_Process_2018	choline catabolic process (GO:0042426)	1
GO_Biological_Process_2018	positive regulation of osteoblast proliferation (GO:0033690)	1
GO_Biological_Process_2018	embryonic skeletal joint morphogenesis (GO:0060272)	1
GO_Biological_Process_2018	forebrain regionalization (GO:0021871)	1
GO_Biological_Process_2018	regulation of aldosterone biosynthetic process (GO:0032347)	1
GO_Biological_Process_2018	regulation of cortisol biosynthetic process (GO:2000064)	1
GO_Biological_Process_2018	negative regulation of delayed rectifier potassium channel activity (GO:1902260)	1
GO_Biological_Process_2018	negative regulation of mononuclear cell migration (GO:0071676)	1
GO_Biological_Process_2018	odontogenesis of dentin-containing tooth (GO:0042475)	1
GO_Biological_Process_2018	negative regulation of transmembrane receptor protein serine/threonine kinase signaling pathway (GO:0090101)	1
GO_Biological_Process_2018	acylglycerol catabolic process (GO:0046464)	1
GO_Biological_Process_2018	cellular response to drug (GO:0035690)	1
GO_Biological_Process_2018	protein localization to lysosome (GO:0061462)	1
GO_Biological_Process_2018	regulation of blood coagulation (GO:0030193)	1
GO_Biological_Process_2018	positive regulation of blood vessel endothelial cell migration (GO:0043536)	1
GO_Biological_Process_2018	positive regulation of type I interferon production (GO:0032481)	1
GO_Biological_Process_2018	positive regulation of keratinocyte proliferation (GO:0010838)	1
GO_Biological_Process_2018	negative regulation of leukocyte migration (GO:0002686)	1
GO_Biological_Process_2018	oxygen transport (GO:0015671)	1
GO_Biological_Process_2018	heme catabolic process (GO:0042167)	1
GO_Biological_Process_2018	porphyrin-containing compound catabolic process (GO:0006787)	1
GO_Biological_Process_2018	pericardium morphogenesis (GO:0003344)	1
GO_Biological_Process_2018	positive regulation of mRNA binding (GO:1902416)	1
GO_Biological_Process_2018	myoblast fusion (GO:0007520)	1
GO_Biological_Process_2018	L-methionine salvage (GO:0071267)	1
GO_Biological_Process_2018	regulation of keratinocyte proliferation (GO:0010837)	1
GO_Biological_Process_2018	tRNA metabolic process (GO:0006399)	1
GO_Biological_Process_2018	negative regulation of fat cell differentiation (GO:0045599)	1
GO_Biological_Process_2018	protein targeting to lysosome (GO:0006622)	1
GO_Biological_Process_2018	endocardial cushion development (GO:0003197)	1
GO_Biological_Process_2018	antimicrobial humoral immune response mediated by antimicrobial peptide (GO:0061844)	1
GO_Biological_Process_2018	ventricular cardiac muscle cell membrane repolarization (GO:0099625)	1
GO_Biological_Process_2018	glycerolipid biosynthetic process (GO:0045017)	1
GO_Biological_Process_2018	negative regulation of voltage-gated potassium channel activity (GO:1903817)	1
GO_Biological_Process_2018	regulation of toll-like receptor 2 signaling pathway (GO:0034135)	1
GO_Biological_Process_2018	lung epithelium development (GO:0060428)	1
GO_Biological_Process_2018	cellular biogenic amine catabolic process (GO:0042402)	1
GO_Biological_Process_2018	regulation of autophagy (GO:0010506)	1
GO_Biological_Process_2018	positive regulation of angiogenesis (GO:0045766)	1
GO_Biological_Process_2018	positive regulation of muscle cell differentiation (GO:0051149)	1
GO_Biological_Process_2018	peptide metabolic process (GO:0006518)	1
GO_Biological_Process_2018	proteolysis (GO:0006508)	1
GO_Biological_Process_2018	mitochondrial electron transport, cytochrome c to oxygen (GO:0006123)	1
GO_Biological_Process_2018	regulation of nuclear division (GO:0051783)	1
GO_Biological_Process_2018	ventricular septum morphogenesis (GO:0060412)	1
GO_Biological_Process_2018	triglyceride metabolic process (GO:0006641)	1
GO_Biological_Process_2018	actin polymerization or depolymerization (GO:0008154)	1
GO_Biological_Process_2018	muscle cell differentiation (GO:0042692)	1
GO_Biological_Process_2018	type B pancreatic cell differentiation (GO:0003309)	1
GO_Biological_Process_2018	positive regulation of protein sumoylation (GO:0033235)	1
GO_Biological_Process_2018	pericardium development (GO:0060039)	1
GO_Biological_Process_2018	potassium ion export (GO:0071435)	1
GO_Biological_Process_2018	Notch signaling involved in heart development (GO:0061314)	1
GO_Biological_Process_2018	atrioventricular valve development (GO:0003171)	1
GO_Biological_Process_2018	B cell homeostasis (GO:0001782)	1
GO_Biological_Process_2018	regulation of dendrite development (GO:0050773)	1
GO_Biological_Process_2018	positive regulation of phosphatase activity (GO:0010922)	1
GO_Biological_Process_2018	cellular protein metabolic process (GO:0044267)	1
GO_Biological_Process_2018	regulation of fat cell differentiation (GO:0045598)	1
GO_Biological_Process_2018	gas transport (GO:0015669)	1
GO_Biological_Process_2018	positive regulation of bone remodeling (GO:0046852)	1
GO_Biological_Process_2018	regulation of respiratory burst (GO:0060263)	1
GO_Biological_Process_2018	base-excision repair, AP site formation (GO:0006285)	1
GO_Biological_Process_2018	positive regulation of cardiac muscle cell differentiation (GO:2000727)	1
GO_Biological_Process_2018	actin filament depolymerization (GO:0030042)	1
GO_Biological_Process_2018	nucleoside metabolic process (GO:0009116)	1
GO_Biological_Process_2018	insulin-like growth factor receptor signaling pathway (GO:0048009)	1
GO_Biological_Process_2018	intraciliary retrograde transport (GO:0035721)	1
GO_Biological_Process_2018	negative regulation of centrosome duplication (GO:0010826)	1
GO_Biological_Process_2018	positive regulation of bone resorption (GO:0045780)	1
GO_Biological_Process_2018	pulmonary valve development (GO:0003177)	1
GO_Biological_Process_2018	cytoplasmic sequestering of NF-kappaB (GO:0007253)	1
GO_Biological_Process_2018	cytosolic transport (GO:0016482)	1
GO_Biological_Process_2018	positive regulation of metabolic process (GO:0009893)	1
GO_Biological_Process_2018	embryonic camera-type eye development (GO:0031076)	1
GO_Biological_Process_2018	phosphatidylinositol biosynthetic process (GO:0006661)	1
GO_Biological_Process_2018	positive regulation of cellular protein localization (GO:1903829)	1
GO_Biological_Process_2018	regulation of cellular amine metabolic process (GO:0033238)	1
GO_Biological_Process_2018	regulation of cellular amino acid metabolic process (GO:0006521)	1
GO_Biological_Process_2018	regulation of microtubule-based movement (GO:0060632)	1
GO_Biological_Process_2018	positive regulation of ruffle assembly (GO:1900029)	1
GO_Biological_Process_2018	negative regulation of catabolic process (GO:0009895)	1
GO_Biological_Process_2018	histone deubiquitination (GO:0016578)	1
GO_Biological_Process_2018	Rho protein signal transduction (GO:0007266)	1
GO_Biological_Process_2018	negative regulation of axonogenesis (GO:0050771)	1
GO_Biological_Process_2018	microtubule polymerization or depolymerization (GO:0031109)	1
GO_Biological_Process_2018	cellular response to interleukin-15 (GO:0071350)	1
GO_Biological_Process_2018	interleukin-15-mediated signaling pathway (GO:0035723)	1
GO_Biological_Process_2018	retrograde transport, endosome to Golgi (GO:0042147)	1
GO_Biological_Process_2018	negative regulation of viral-induced cytoplasmic pattern recognition receptor signaling pathway (GO:0039532)	1
GO_Biological_Process_2018	establishment of spindle localization (GO:0051293)	1
GO_Biological_Process_2018	positive regulation of mRNA splicing, via spliceosome (GO:0048026)	1
GO_Biological_Process_2018	determination of digestive tract left/right asymmetry (GO:0071907)	1
GO_Biological_Process_2018	negative regulation of receptor internalization (GO:0002091)	1
GO_Biological_Process_2018	negative regulation of RIG-I signaling pathway (GO:0039536)	1
GO_Biological_Process_2018	fatty acid derivative biosynthetic process (GO:1901570)	1
GO_Biological_Process_2018	histone monoubiquitination (GO:0010390)	1
GO_Biological_Process_2018	anaphase-promoting complex-dependent catabolic process (GO:0031145)	1
GO_Biological_Process_2018	preassembly of GPI anchor in ER membrane (GO:0016254)	1
GO_Biological_Process_2018	negative regulation of ubiquitin-protein ligase activity involved in mitotic cell cycle (GO:0051436)	1
GO_Biological_Process_2018	long-chain fatty acid metabolic process (GO:0001676)	1
GO_Biological_Process_2018	positive regulation of transcription from RNA polymerase I promoter (GO:0045943)	1
GO_Biological_Process_2018	mesoderm development (GO:0007498)	1
GO_Biological_Process_2018	regulation of ubiquitin-protein ligase activity involved in mitotic cell cycle (GO:0051439)	1
GO_Biological_Process_2018	regulation of mRNA splicing, via spliceosome (GO:0048024)	1
GO_Biological_Process_2018	chromosome organization (GO:0051276)	1
GO_Biological_Process_2018	chloride transmembrane transport (GO:1902476)	1
GO_Biological_Process_2018	regulation of peptidyl-tyrosine phosphorylation (GO:0050730)	1
GO_Biological_Process_2018	sulfate transmembrane transport (GO:1902358)	1
GO_Biological_Process_2018	regulation of cellular localization (GO:0060341)	1
GO_Biological_Process_2018	cell-cell junction organization (GO:0045216)	1
GO_Biological_Process_2018	positive regulation of phosphatidylinositol 3-kinase signaling (GO:0014068)	1
GO_Biological_Process_2018	positive regulation of calcium ion import (GO:0090280)	1
GO_Biological_Process_2018	negative regulation of myeloid cell apoptotic process (GO:0033033)	1
GO_Biological_Process_2018	catecholamine metabolic process (GO:0006584)	1
GO_Biological_Process_2018	positive regulation of plasma membrane bounded cell projection assembly (GO:0120034)	1
GO_Biological_Process_2018	regulation of neurotransmitter transport (GO:0051588)	1
GO_Biological_Process_2018	chondroitin sulfate catabolic process (GO:0030207)	1
GO_Biological_Process_2018	positive regulation of supramolecular fiber organization (GO:1902905)	1
GO_Biological_Process_2018	cellular response to organic cyclic compound (GO:0071407)	1
GO_Biological_Process_2018	insulin receptor signaling pathway (GO:0008286)	1
GO_Biological_Process_2018	regulation of platelet-derived growth factor receptor-beta signaling pathway (GO:2000586)	1
GO_Biological_Process_2018	actin crosslink formation (GO:0051764)	1
GO_Biological_Process_2018	positive regulation of protein kinase A signaling (GO:0010739)	1
GO_Biological_Process_2018	cellular response to histamine (GO:0071420)	1
GO_Biological_Process_2018	positive regulation of interleukin-5 production (GO:0032754)	1
GO_Biological_Process_2018	aspartate family amino acid catabolic process (GO:0009068)	1
GO_Biological_Process_2018	establishment of protein localization to chromosome (GO:0070199)	1
GO_Biological_Process_2018	apical junction assembly (GO:0043297)	1
GO_Biological_Process_2018	regulation of cellular pH (GO:0030641)	1
GO_Biological_Process_2018	positive regulation of JAK-STAT cascade (GO:0046427)	1
GO_Biological_Process_2018	regulation of actin cytoskeleton reorganization (GO:2000249)	1
GO_Biological_Process_2018	cellular response to organonitrogen compound (GO:0071417)	1
GO_Biological_Process_2018	alternative mRNA splicing, via spliceosome (GO:0000380)	1
GO_Biological_Process_2018	establishment of protein localization to mitochondrial membrane (GO:0090151)	1
GO_Biological_Process_2018	L-amino acid transport (GO:0015807)	1
GO_Biological_Process_2018	organonitrogen compound catabolic process (GO:1901565)	1
GO_Biological_Process_2018	regulation of actin filament polymerization (GO:0030833)	1
GO_Biological_Process_2018	regulation of phosphatidylinositol 3-kinase signaling (GO:0014066)	1
GO_Biological_Process_2018	bicellular tight junction assembly (GO:0070830)	1
GO_Biological_Process_2018	dopamine metabolic process (GO:0042417)	1
GO_Biological_Process_2018	cell projection assembly (GO:0030031)	1
GO_Biological_Process_2018	cellular response to growth hormone stimulus (GO:0071378)	1
GO_Biological_Process_2018	epithelial cell morphogenesis (GO:0003382)	1
GO_Biological_Process_2018	response to histamine (GO:0034776)	1
GO_Biological_Process_2018	regulation of phospholipid metabolic process (GO:1903725)	1
GO_Biological_Process_2018	monovalent inorganic anion homeostasis (GO:0055083)	1
GO_Biological_Process_2018	regulation of smooth muscle contraction (GO:0006940)	1
GO_Biological_Process_2018	positive regulation of monooxygenase activity (GO:0032770)	1
GO_Biological_Process_2018	positive regulation of cellular biosynthetic process (GO:0031328)	1
GO_Biological_Process_2018	establishment of epithelial cell polarity (GO:0090162)	1
GO_Biological_Process_2018	regulation of smooth muscle cell migration (GO:0014910)	1
GO_Biological_Process_2018	nucleocytoplasmic transport (GO:0006913)	1
GO_Biological_Process_2018	regulation of translation (GO:0006417)	1
GO_Biological_Process_2018	cellular response to forskolin (GO:1904322)	1
GO_Biological_Process_2018	response to forskolin (GO:1904321)	1
GO_Biological_Process_2018	regulation of store-operated calcium entry (GO:2001256)	1
GO_Biological_Process_2018	positive regulation of viral entry into host cell (GO:0046598)	1
GO_Biological_Process_2018	ribosome disassembly (GO:0032790)	1
GO_Biological_Process_2018	regulation of mitochondrion organization (GO:0010821)	1
GO_Biological_Process_2018	regulation of establishment of planar polarity (GO:0090175)	1
GO_Biological_Process_2018	entry of bacterium into host cell (GO:0035635)	1
GO_Biological_Process_2018	membrane depolarization during cardiac muscle cell action potential (GO:0086012)	1
GO_Biological_Process_2018	Wnt signaling pathway involved in midbrain dopaminergic neuron differentiation (GO:1904953)	1
GO_Biological_Process_2018	inhibition of cysteine-type endopeptidase activity (GO:0097340)	1
GO_Biological_Process_2018	regulation of interleukin-1 beta secretion (GO:0050706)	1
GO_Biological_Process_2018	lysosome localization (GO:0032418)	1
GO_Biological_Process_2018	cardiac muscle cell action potential (GO:0086001)	1
GO_Biological_Process_2018	regulation of heart rate by cardiac conduction (GO:0086091)	1
GO_Biological_Process_2018	negative regulation of protein kinase B signaling (GO:0051898)	1
GO_Biological_Process_2018	sterol transport (GO:0015918)	1
GO_Biological_Process_2018	cellular response to increased oxygen levels (GO:0036295)	1
GO_Biological_Process_2018	inhibition of cysteine-type endopeptidase activity involved in apoptotic process (GO:1990001)	1
GO_Biological_Process_2018	non-canonical Wnt signaling pathway (GO:0035567)	1
GO_Biological_Process_2018	regulation of bone resorption (GO:0045124)	1
GO_Biological_Process_2018	protein complex disassembly (GO:0043241)	1
GO_Biological_Process_2018	positive regulation of stress fiber assembly (GO:0051496)	1
GO_Biological_Process_2018	positive regulation of cytokinesis (GO:0032467)	1
GO_Biological_Process_2018	tRNA pseudouridine synthesis (GO:0031119)	1
GO_Biological_Process_2018	membrane lipid metabolic process (GO:0006643)	1
GO_Biological_Process_2018	coenzyme A metabolic process (GO:0015936)	1
GO_Biological_Process_2018	regulation of plasma membrane bounded cell projection assembly (GO:0120032)	1
GO_Biological_Process_2018	positive regulation of microtubule polymerization or depolymerization (GO:0031112)	1
GO_Biological_Process_2018	positive regulation of microtubule polymerization (GO:0031116)	1
GO_Biological_Process_2018	positive regulation of ion transport (GO:0043270)	1
GO_Biological_Process_2018	steroid biosynthetic process (GO:0006694)	1
GO_Biological_Process_2018	regulation of acyl-CoA biosynthetic process (GO:0050812)	1
GO_Biological_Process_2018	cellular response to nitrogen starvation (GO:0006995)	1
GO_Biological_Process_2018	regulation of acetyl-CoA biosynthetic process from pyruvate (GO:0010510)	1
GO_Biological_Process_2018	sensory perception of taste (GO:0050909)	1
GO_Biological_Process_2018	cellular response to nitrogen levels (GO:0043562)	1
GO_Biological_Process_2018	regulation of interleukin-1 beta production (GO:0032651)	1
GO_Biological_Process_2018	synaptic vesicle cycle (GO:0099504)	1
GO_Biological_Process_2018	transmembrane transport (GO:0055085)	1
GO_Biological_Process_2018	embryonic digit morphogenesis (GO:0042733)	1
GO_Biological_Process_2018	positive regulation of triglyceride metabolic process (GO:0090208)	1
GO_Biological_Process_2018	negative regulation of Wnt signaling pathway (GO:0030178)	1
GO_Biological_Process_2018	cellular response to nitric oxide (GO:0071732)	1
GO_Biological_Process_2018	cellular response to reactive nitrogen species (GO:1902170)	1
GO_Biological_Process_2018	arachidonate transport (GO:1903963)	1
GO_Biological_Process_2018	negative regulation of glial cell differentiation (GO:0045686)	1
GO_Biological_Process_2018	arachidonic acid secretion (GO:0050482)	1
GO_Biological_Process_2018	positive regulation of macromolecule metabolic process (GO:0010604)	1
GO_Biological_Process_2018	cardiac muscle cell action potential involved in contraction (GO:0086002)	1
GO_Biological_Process_2018	regulation of vasculature development (GO:1901342)	1
GO_Biological_Process_2018	regulation of receptor internalization (GO:0002090)	1
GO_Biological_Process_2018	beta-catenin destruction complex disassembly (GO:1904886)	1
GO_Biological_Process_2018	urogenital system development (GO:0001655)	1
GO_Biological_Process_2018	positive regulation of actin filament bundle assembly (GO:0032233)	1
GO_Biological_Process_2018	cholesterol transport (GO:0030301)	1
GO_Biological_Process_2018	ion transmembrane transport (GO:0034220)	1
GO_Biological_Process_2018	cellular response to peptide (GO:1901653)	1
GO_Biological_Process_2018	regulation of cellular metabolic process (GO:0031323)	1
GO_Biological_Process_2018	positive regulation of cell division (GO:0051781)	1
GO_Biological_Process_2018	positive regulation of receptor-mediated endocytosis (GO:0048260)	1
GO_Biological_Process_2018	organic cyclic compound catabolic process (GO:1901361)	1
GO_Biological_Process_2018	negative regulation of peptide secretion (GO:0002792)	1
GO_Biological_Process_2018	regulation of cellular ketone metabolic process (GO:0010565)	1
GO_Biological_Process_2018	negative regulation of canonical Wnt signaling pathway (GO:0090090)	1
GO_Biological_Process_2018	ATP biosynthetic process (GO:0006754)	1
GO_Biological_Process_2018	positive regulation of calcium ion transport into cytosol (GO:0010524)	1
GO_Biological_Process_2018	protein sulfation (GO:0006477)	1
GO_Biological_Process_2018	negative regulation of chromosome organization (GO:2001251)	1
GO_Biological_Process_2018	viral release from host cell (GO:0019076)	1
GO_Biological_Process_2018	negative regulation of oligodendrocyte differentiation (GO:0048715)	1
GO_Biological_Process_2018	negative regulation of receptor biosynthetic process (GO:0010871)	1
GO_Biological_Process_2018	negative regulation of neural precursor cell proliferation (GO:2000178)	1
GO_Biological_Process_2018	exit from host cell (GO:0035891)	1
GO_Biological_Process_2018	regulation of atrial cardiac muscle cell membrane depolarization (GO:0060371)	1
GO_Biological_Process_2018	aromatic compound catabolic process (GO:0019439)	1
GO_Biological_Process_2018	acetyl-CoA biosynthetic process (GO:0006085)	1
GO_Biological_Process_2018	release of sequestered calcium ion into cytosol by sarcoplasmic reticulum (GO:0014808)	1
GO_Biological_Process_2018	positive regulation of autophagosome maturation (GO:1901098)	1
GO_Biological_Process_2018	positive regulation of kidney development (GO:0090184)	1
GO_Biological_Process_2018	astrocyte differentiation (GO:0048708)	1
GO_Biological_Process_2018	heterocycle catabolic process (GO:0046700)	1
GO_Biological_Process_2018	negative regulation of bone resorption (GO:0045779)	1
GO_Biological_Process_2018	phagosome-lysosome fusion (GO:0090385)	1
GO_Biological_Process_2018	myotube cell development (GO:0014904)	1
GO_Biological_Process_2018	regulation of histone acetylation (GO:0035065)	1
GO_Biological_Process_2018	cellular response to gamma radiation (GO:0071480)	1
GO_Biological_Process_2018	regulation of lipid catabolic process (GO:0050994)	1
GO_Biological_Process_2018	cellular response to inorganic substance (GO:0071241)	1
GO_Biological_Process_2018	cardiac muscle cell contraction (GO:0086003)	1
GO_Biological_Process_2018	positive regulation of ERBB signaling pathway (GO:1901186)	1
GO_Biological_Process_2018	TOR signaling (GO:0031929)	1
GO_Biological_Process_2018	organic hydroxy compound biosynthetic process (GO:1901617)	1
GO_Biological_Process_2018	regulation of filopodium assembly (GO:0051489)	1
GO_Biological_Process_2018	JNK cascade (GO:0007254)	1
GO_Biological_Process_2018	entry into host cell (GO:0030260)	1
GO_Biological_Process_2018	positive regulation of cell-matrix adhesion (GO:0001954)	1
GO_Biological_Process_2018	very-low-density lipoprotein particle remodeling (GO:0034372)	1
GO_Biological_Process_2018	sarcoplasmic reticulum calcium ion transport (GO:0070296)	1
GO_Biological_Process_2018	cellular response to oxygen levels (GO:0071453)	1
GO_Biological_Process_2018	serine family amino acid catabolic process (GO:0009071)	1
GO_Biological_Process_2018	regulation of ARF protein signal transduction (GO:0032012)	1
GO_Biological_Process_2018	protein homotetramerization (GO:0051289)	1
GO_Biological_Process_2018	amine metabolic process (GO:0009308)	1
GO_Biological_Process_2018	cAMP-mediated signaling (GO:0019933)	1
GO_Biological_Process_2018	hexose metabolic process (GO:0019318)	1
GO_Biological_Process_2018	thyroid gland development (GO:0030878)	1
GO_Biological_Process_2018	endocrine system development (GO:0035270)	1
GO_Biological_Process_2018	nucleotide-excision repair, DNA incision, 3'-to lesion (GO:0006295)	1
GO_Biological_Process_2018	plasminogen activation (GO:0031639)	1
GO_Biological_Process_2018	signal transduction involved in G2 DNA damage checkpoint (GO:0072425)	1
GO_Biological_Process_2018	protein tetramerization (GO:0051262)	1
GO_Biological_Process_2018	signal peptide processing (GO:0006465)	1
GO_Biological_Process_2018	nucleic acid transport (GO:0050657)	1
GO_Biological_Process_2018	nucleotide-excision repair, preincision complex stabilization (GO:0006293)	1
GO_Biological_Process_2018	regulation of heterotypic cell-cell adhesion (GO:0034114)	1
GO_Biological_Process_2018	ionotropic glutamate receptor signaling pathway (GO:0035235)	1
GO_Biological_Process_2018	G-protein coupled receptor signaling pathway, coupled to cyclic nucleotide second messenger (GO:0007187)	1
GO_Biological_Process_2018	positive regulation of fatty acid metabolic process (GO:0045923)	1
GO_Biological_Process_2018	positive regulation of mesonephros development (GO:0061213)	1
GO_Biological_Process_2018	angiotensin maturation (GO:0002003)	1
GO_Biological_Process_2018	drug transmembrane transport (GO:0006855)	1
GO_Biological_Process_2018	regulation of fibrinolysis (GO:0051917)	1
GO_Biological_Process_2018	negative regulation of endothelial cell apoptotic process (GO:2000352)	1
GO_Biological_Process_2018	positive regulation of secretion by cell (GO:1903532)	1
GO_Biological_Process_2018	negative regulation of blood coagulation (GO:0030195)	1
GO_Biological_Process_2018	cellular response to lipid (GO:0071396)	1
GO_Biological_Process_2018	protein geranylgeranylation (GO:0018344)	1
GO_Biological_Process_2018	heparan sulfate proteoglycan biosynthetic process, enzymatic modification (GO:0015015)	1
GO_Biological_Process_2018	phospholipase C-activating G-protein coupled acetylcholine receptor signaling pathway (GO:0007207)	1
GO_Biological_Process_2018	sphingosine-1-phosphate signaling pathway (GO:0003376)	1
GO_Biological_Process_2018	adenylate cyclase-activating G-protein coupled receptor signaling pathway (GO:0007189)	1
GO_Biological_Process_2018	protein N-linked glycosylation (GO:0006487)	1
GO_Biological_Process_2018	regulation of transcription from RNA polymerase II promoter (GO:0006357)	1
GO_Biological_Process_2018	positive regulation of branching involved in ureteric bud morphogenesis (GO:0090190)	1
GO_Biological_Process_2018	regulation of angiotensin levels in blood (GO:0002002)	1
GO_Biological_Process_2018	cardiac right ventricle morphogenesis (GO:0003215)	1
GO_Biological_Process_2018	positive regulation of growth (GO:0045927)	1
GO_Biological_Process_2018	regulation of protein oligomerization (GO:0032459)	1
GO_Biological_Process_2018	regulation of protein metabolic process (GO:0051246)	1
GO_Biological_Process_2018	mitotic nuclear division (GO:0140014)	1
GO_Biological_Process_2018	cellular response to oxygen-containing compound (GO:1901701)	1
GO_Biological_Process_2018	positive regulation of peptide secretion (GO:0002793)	1
GO_Biological_Process_2018	negative regulation of protein complex assembly (GO:0031333)	1
GO_Biological_Process_2018	regulation of fatty acid biosynthetic process (GO:0042304)	1
GO_Biological_Process_2018	gland development (GO:0048732)	1
GO_Biological_Process_2018	pharyngeal system development (GO:0060037)	1
GO_Biological_Process_2018	positive regulation of transcription of Notch receptor target (GO:0007221)	1
GO_Biological_Process_2018	cellular response to glucocorticoid stimulus (GO:0071385)	1
GO_Biological_Process_2018	regulation of interferon-gamma production (GO:0032649)	1
GO_Biological_Process_2018	liver development (GO:0001889)	1
GO_Biological_Process_2018	macromolecule modification (GO:0043412)	1
GO_Biological_Process_2018	response to glucocorticoid (GO:0051384)	1
GO_Biological_Process_2018	positive regulation of acute inflammatory response (GO:0002675)	1
GO_Biological_Process_2018	establishment of protein localization to endoplasmic reticulum (GO:0072599)	1
GO_Biological_Process_2018	zymogen activation (GO:0031638)	1
GO_Biological_Process_2018	regulation of cell communication (GO:0010646)	1
GO_Biological_Process_2018	nucleotide-excision repair, preincision complex assembly (GO:0006294)	1
GO_Biological_Process_2018	negative regulation of epithelial cell apoptotic process (GO:1904036)	1
GO_Biological_Process_2018	signal transduction involved in DNA damage checkpoint (GO:0072422)	1
GO_Biological_Process_2018	phospholipase C-activating dopamine receptor signaling pathway (GO:0060158)	1
GO_Biological_Process_2018	regulation of macromolecule biosynthetic process (GO:0010556)	1
GO_Biological_Process_2018	protein localization to pre-autophagosomal structure (GO:0034497)	1
GO_Biological_Process_2018	peptidyl-glutamic acid modification (GO:0018200)	1
GO_Biological_Process_2018	protein N-linked glycosylation via asparagine (GO:0018279)	1
GO_Biological_Process_2018	steroid hormone mediated signaling pathway (GO:0043401)	1
GO_Biological_Process_2018	negative regulation of interferon-gamma production (GO:0032689)	1
GO_Biological_Process_2018	autophagy of nucleus (GO:0044804)	1
GO_Biological_Process_2018	negative regulation of fibrinolysis (GO:0051918)	1
GO_Biological_Process_2018	regulation of leukocyte activation (GO:0002694)	1
GO_Biological_Process_2018	mesodermal cell differentiation (GO:0048333)	1
GO_Biological_Process_2018	DNA topological change (GO:0006265)	1
GO_Biological_Process_2018	cellular response to glucagon stimulus (GO:0071377)	1
GO_Biological_Process_2018	nucleoside catabolic process (GO:0009164)	1
GO_Biological_Process_2018	cellular response to starvation (GO:0009267)	1
GO_Biological_Process_2018	response to glucagon (GO:0033762)	1
GO_Biological_Process_2018	regulation of kinase activity (GO:0043549)	1
GO_Biological_Process_2018	hyperosmotic response (GO:0006972)	1
GO_Biological_Process_2018	cellular response to glucose starvation (GO:0042149)	1
GO_Biological_Process_2018	extracellular matrix organization (GO:0030198)	1
GO_Biological_Process_2018	production of miRNAs involved in gene silencing by miRNA (GO:0035196)	1
GO_Biological_Process_2018	primary neural tube formation (GO:0014020)	1
GO_Biological_Process_2018	glucose transmembrane transport (GO:1904659)	1
GO_Biological_Process_2018	positive regulation of transferase activity (GO:0051347)	1
GO_Biological_Process_2018	regulation of monocyte differentiation (GO:0045655)	1
GO_Biological_Process_2018	DNA damage response, signal transduction by p53 class mediator (GO:0030330)	1
GO_Biological_Process_2018	tube closure (GO:0060606)	1
GO_Biological_Process_2018	positive regulation of interleukin-1 production (GO:0032732)	1
GO_Biological_Process_2018	regulation of myeloid cell differentiation (GO:0045637)	1
GO_Biological_Process_2018	positive regulation of kinase activity (GO:0033674)	1
GO_Biological_Process_2018	anatomical structure homeostasis (GO:0060249)	1
GO_Biological_Process_2018	catecholamine transport (GO:0051937)	1
GO_Biological_Process_2018	establishment of protein localization to telomere (GO:0070200)	1
GO_Biological_Process_2018	protein retention in ER lumen (GO:0006621)	1
GO_Biological_Process_2018	regulation of megakaryocyte differentiation (GO:0045652)	1
GO_Biological_Process_2018	regulation of Ras protein signal transduction (GO:0046578)	1
GO_Biological_Process_2018	phosphatidic acid metabolic process (GO:0046473)	1
GO_Biological_Process_2018	telomere organization (GO:0032200)	1
GO_Biological_Process_2018	pyrimidine nucleoside metabolic process (GO:0006213)	1
GO_Biological_Process_2018	neural tube closure (GO:0001843)	1
GO_Biological_Process_2018	regulation of protein targeting to mitochondrion (GO:1903214)	1
GO_Biological_Process_2018	regulation of telomere capping (GO:1904353)	1
GO_Biological_Process_2018	monovalent inorganic cation homeostasis (GO:0055067)	1
GO_Biological_Process_2018	regulation of lipid kinase activity (GO:0043550)	1
GO_Biological_Process_2018	positive regulation of smooth muscle cell proliferation (GO:0048661)	1
GO_Biological_Process_2018	negative regulation of Ras protein signal transduction (GO:0046580)	1
GO_Biological_Process_2018	phosphatidic acid biosynthetic process (GO:0006654)	1
GO_Biological_Process_2018	activation of protein kinase A activity (GO:0034199)	1
GO_Biological_Process_2018	aminoglycan catabolic process (GO:0006026)	1
GO_Biological_Process_2018	phosphatidylinositol metabolic process (GO:0046488)	1
GO_Biological_Process_2018	maintenance of protein localization in endoplasmic reticulum (GO:0035437)	1
GO_Biological_Process_2018	positive regulation of mitochondrion organization (GO:0010822)	1
GO_Biological_Process_2018	negative regulation of cellular process (GO:0048523)	1
GO_Biological_Process_2018	hexose transmembrane transport (GO:0035428)	1
GO_Biological_Process_2018	production of small RNA involved in gene silencing by RNA (GO:0070918)	1
GO_Biological_Process_2018	pyrimidine-containing compound catabolic process (GO:0072529)	1
GO_Biological_Process_2018	response to ethanol (GO:0045471)	1
GO_Biological_Process_2018	regulation of fatty acid metabolic process (GO:0019217)	1
GO_Biological_Process_2018	positive regulation of vascular smooth muscle cell proliferation (GO:1904707)	1
GO_Biological_Process_2018	mitochondrial electron transport, ubiquinol to cytochrome c (GO:0006122)	1
GO_Biological_Process_2018	miRNA loading onto RISC involved in gene silencing by miRNA (GO:0035280)	1
GO_Biological_Process_2018	cellular response to sterol depletion (GO:0071501)	1
GO_Biological_Process_2018	xenobiotic catabolic process (GO:0042178)	1
GO_Biological_Process_2018	fructose 1,6-bisphosphate metabolic process (GO:0030388)	1
GO_Biological_Process_2018	positive regulation of glutamate receptor signaling pathway (GO:1900451)	1
GO_Biological_Process_2018	cellular response to leptin stimulus (GO:0044320)	1
GO_Biological_Process_2018	smoothened signaling pathway (GO:0007224)	1
GO_Biological_Process_2018	cyclic purine nucleotide metabolic process (GO:0052652)	1
GO_Biological_Process_2018	negative regulation of stress-activated MAPK cascade (GO:0032873)	1
GO_Biological_Process_2018	glucose transport (GO:0015758)	1
GO_Biological_Process_2018	negative regulation of telomere maintenance (GO:0032205)	1
GO_Biological_Process_2018	canonical glycolysis (GO:0061621)	1
GO_Biological_Process_2018	RNA splicing, via transesterification reactions (GO:0000375)	1
GO_Biological_Process_2018	signal transduction in response to DNA damage (GO:0042770)	1
GO_Biological_Process_2018	glycolytic process through glucose-6-phosphate (GO:0061620)	1
GO_Biological_Process_2018	glucose catabolic process to pyruvate (GO:0061718)	1
GO_Biological_Process_2018	cellular response to amino acid starvation (GO:0034198)	1
GO_Biological_Process_2018	peptidyl-arginine modification (GO:0018195)	1
GO_Biological_Process_2018	spliceosomal tri-snRNP complex assembly (GO:0000244)	1
GO_Biological_Process_2018	positive regulation of protein targeting to mitochondrion (GO:1903955)	1
GO_Biological_Process_2018	positive regulation of telomere maintenance via telomere lengthening (GO:1904358)	1
GO_Biological_Process_2018	cellular response to peptide hormone stimulus (GO:0071375)	1
GO_Biological_Process_2018	chromosome condensation (GO:0030261)	1
GO_Biological_Process_2018	glycolytic process (GO:0006096)	1
GO_Biological_Process_2018	negative regulation of oxidative stress-induced neuron death (GO:1903204)	1
GO_Biological_Process_2018	glycine metabolic process (GO:0006544)	1
GO_Biological_Process_2018	telomere maintenance in response to DNA damage (GO:0043247)	1
GO_Biological_Process_2018	mitotic G1/S transition checkpoint (GO:0044819)	1
GO_Biological_Process_2018	telomeric loop disassembly (GO:0090657)	1
GO_Biological_Process_2018	negative regulation of glucose transport (GO:0010829)	1
GO_Biological_Process_2018	double-strand break repair via homologous recombination (GO:0000724)	1
GO_Biological_Process_2018	phospholipid metabolic process (GO:0006644)	1
GO_Biological_Process_2018	positive regulation of interleukin-1 secretion (GO:0050716)	1
GO_Biological_Process_2018	posttranscriptional gene silencing by RNA (GO:0035194)	1
GO_Biological_Process_2018	cell-substrate adherens junction assembly (GO:0007045)	1
GO_Biological_Process_2018	focal adhesion assembly (GO:0048041)	1
GO_Biological_Process_2018	negative regulation of signaling (GO:0023057)	1
GO_Biological_Process_2018	positive regulation of telomerase activity (GO:0051973)	1
GO_Biological_Process_2018	recombinational repair (GO:0000725)	1
GO_Biological_Process_2018	monocarboxylic acid biosynthetic process (GO:0072330)	1
GO_Biological_Process_2018	DNA damage response, signal transduction by p53 class mediator resulting in cell cycle arrest (GO:0006977)	1
GO_Biological_Process_2018	regulation of substrate adhesion-dependent cell spreading (GO:1900024)	1
GO_Biological_Process_2018	organophosphate catabolic process (GO:0046434)	1
GO_Biological_Process_2018	regulation of transcription from RNA polymerase II promoter in response to oxidative stress (GO:0043619)	1
GO_Biological_Process_2018	telomeric D-loop disassembly (GO:0061820)	1
GO_Biological_Process_2018	embryonic appendage morphogenesis (GO:0035113)	1
GO_Biological_Process_2018	pre-miRNA processing (GO:0031054)	1
GO_Biological_Process_2018	DNA strand elongation (GO:0022616)	1
GO_Biological_Process_2018	cGMP biosynthetic process (GO:0006182)	1
GO_Biological_Process_2018	ATP generation from ADP (GO:0006757)	1
GO_Biological_Process_2018	purine ribonucleotide biosynthetic process (GO:0009152)	1
GO_Biological_Process_2018	phosphatidylinositol phosphorylation (GO:0046854)	1
GO_Biological_Process_2018	lysosomal transport (GO:0007041)	1
GO_Biological_Process_2018	regulation of transposition (GO:0010528)	1
GO_Biological_Process_2018	protein maturation (GO:0051604)	1
GO_Biological_Process_2018	nucleic acid phosphodiester bond hydrolysis (GO:0090305)	1
GO_Biological_Process_2018	negative regulation of transposition (GO:0010529)	1
GO_Biological_Process_2018	regulation of nuclease activity (GO:0032069)	1
GO_Biological_Process_2018	fatty acid biosynthetic process (GO:0006633)	1
GO_Biological_Process_2018	endocytic recycling (GO:0032456)	1
GO_Biological_Process_2018	positive regulation of endopeptidase activity (GO:0010950)	1
GO_Biological_Process_2018	relaxation of muscle (GO:0090075)	1
GO_Biological_Process_2018	epithelial cell development (GO:0002064)	1
GO_Biological_Process_2018	plasma membrane organization (GO:0007009)	1
GO_Biological_Process_2018	nucleotide-excision repair, DNA incision, 5'-to lesion (GO:0006296)	1
GO_Biological_Process_2018	regulation of RNA metabolic process (GO:0051252)	1
GO_Biological_Process_2018	regulation of proteolysis involved in cellular protein catabolic process (GO:1903050)	1
GO_Biological_Process_2018	nucleotide-excision repair, DNA incision (GO:0033683)	1
GO_Biological_Process_2018	positive regulation of JNK cascade (GO:0046330)	1
GO_Biological_Process_2018	regulation of cytoskeleton organization (GO:0051493)	1
GO_Biological_Process_2018	monosaccharide transport (GO:0015749)	1
GO_Biological_Process_2018	negative regulation of smoothened signaling pathway (GO:0045879)	1
GO_Biological_Process_2018	positive regulation of lipid storage (GO:0010884)	1
GO_Biological_Process_2018	ectoderm development (GO:0007398)	1
GO_Biological_Process_2018	lipid biosynthetic process (GO:0008610)	1
GO_Biological_Process_2018	macropinocytosis (GO:0044351)	1
GO_Biological_Process_2018	azole transport (GO:0045117)	1
GO_Biological_Process_2018	monoamine transport (GO:0015844)	1
GO_Biological_Process_2018	positive regulation of granulocyte differentiation (GO:0030854)	1
GO_Biological_Process_2018	hormone transport (GO:0009914)	1
GO_Biological_Process_2018	positive regulation of cholesterol storage (GO:0010886)	1
GO_Biological_Process_2018	long term synaptic depression (GO:0060292)	1
GO_Biological_Process_2018	gene silencing by miRNA (GO:0035195)	1
GO_Biological_Process_2018	DNA metabolic process (GO:0006259)	1
GO_Biological_Process_2018	phospholipid biosynthetic process (GO:0008654)	1
GO_Biological_Process_2018	positive regulation of stress-activated MAPK cascade (GO:0032874)	1
GO_Biological_Process_2018	negative regulation of telomere maintenance via telomere lengthening (GO:1904357)	1
GO_Biological_Process_2018	actin filament organization (GO:0007015)	1
GO_Biological_Process_2018	vesicle docking (GO:0048278)	1
GO_Biological_Process_2018	icosanoid biosynthetic process (GO:0046456)	1
GO_Biological_Process_2018	urate metabolic process (GO:0046415)	1
GO_Biological_Process_2018	DNA damage checkpoint (GO:0000077)	1
GO_Biological_Process_2018	regulation of cell cycle phase transition (GO:1901987)	1
GO_Biological_Process_2018	positive regulation of apoptotic signaling pathway (GO:2001235)	1
GO_Biological_Process_2018	postsynaptic density assembly (GO:0097107)	1
GO_Biological_Process_2018	mannose metabolic process (GO:0006013)	1
GO_Biological_Process_2018	ethanol catabolic process (GO:0006068)	1
GO_Biological_Process_2018	ethanol metabolic process (GO:0006067)	1
GO_Biological_Process_2018	neutrophil mediated immunity (GO:0002446)	1
GO_Biological_Process_2018	regulation of cholesterol storage (GO:0010885)	1
