# Supplementary material for: Dissecting Molecular Heterogeneity of Circulating Tumor Cells (CTCs) from Metastatic Breast Cancer Patients through Copy Number Aberration (CNA) and Single Nucleotide Variant (SNV) Single Cell Analysis
Source: Cancers (Basel). 2022 Aug 14;14(16):3925. doi: 10.3390/cancers14163925 (PMC9405921; doi:10.3390/cancers14163925)
Supplement: Supplementary file 1 [file cancers-14-03925-s001.zip › Supplementary Material Table S3.xlsx]

## Sheet: General
Database	Enriched term	Number of CTCs
GO_Molecular_Function_2018	RAGE receptor binding (GO:0050786)	61
GO_Molecular_Function_2018	calcium ion binding (GO:0005509)	56
GO_Molecular_Function_2018	metal ion binding (GO:0046872)	55
GO_Molecular_Function_2018	RNA binding (GO:0003723)	50
GO_Molecular_Function_2018	adenylyltransferase activity (GO:0070566)	47
GO_Molecular_Function_2018	ephrin receptor binding (GO:0046875)	47
GO_Molecular_Function_2018	purine ribonucleoside triphosphate binding (GO:0035639)	43
GO_Molecular_Function_2018	serine-type endopeptidase inhibitor activity (GO:0004867)	39
GO_Molecular_Function_2018	L-proline transmembrane transporter activity (GO:0015193)	39
GO_Molecular_Function_2018	fatty-acyl-CoA synthase activity (GO:0004321)	39
GO_Molecular_Function_2018	cysteine-type endopeptidase inhibitor activity (GO:0004869)	38
GO_Molecular_Function_2018	acyl-CoA ligase activity (GO:0003996)	38
GO_Molecular_Function_2018	CoA-ligase activity (GO:0016405)	38
GO_Molecular_Function_2018	ATP-dependent RNA helicase activity (GO:0004004)	38
GO_Molecular_Function_2018	leucine zipper domain binding (GO:0043522)	38
GO_Molecular_Function_2018	water transmembrane transporter activity (GO:0005372)	37
GO_Molecular_Function_2018	water channel activity (GO:0015250)	37
GO_Molecular_Function_2018	transcription coactivator activity (GO:0003713)	37
GO_Molecular_Function_2018	MHC class II protein binding (GO:0042289)	37
GO_Molecular_Function_2018	salt transmembrane transporter activity (GO:1901702)	37
GO_Molecular_Function_2018	urate transmembrane transporter activity (GO:0015143)	37
GO_Molecular_Function_2018	inorganic anion transmembrane transporter activity (GO:0015103)	37
GO_Molecular_Function_2018	sodium-independent organic anion transmembrane transporter activity (GO:0015347)	37
GO_Molecular_Function_2018	RNA-dependent ATPase activity (GO:0008186)	37
GO_Molecular_Function_2018	acid-thiol ligase activity (GO:0016878)	37
GO_Molecular_Function_2018	C-acyltransferase activity (GO:0016408)	36
GO_Molecular_Function_2018	neurotrophin TRKA receptor binding (GO:0005168)	36
GO_Molecular_Function_2018	ATP binding (GO:0005524)	35
GO_Molecular_Function_2018	purinergic receptor activity (GO:0035586)	35
GO_Molecular_Function_2018	sulfurtransferase activity (GO:0016783)	35
GO_Molecular_Function_2018	syntaxin binding (GO:0019905)	32
GO_Molecular_Function_2018	CCR chemokine receptor binding (GO:0048020)	32
GO_Molecular_Function_2018	cation:amino acid symporter activity (GO:0005416)	32
GO_Molecular_Function_2018	organic anion transmembrane transporter activity (GO:0008514)	32
GO_Molecular_Function_2018	RNA helicase activity (GO:0003724)	32
GO_Molecular_Function_2018	anion transmembrane transporter activity (GO:0008509)	31
GO_Molecular_Function_2018	transcription factor activity, RNA polymerase II core promoter proximal region sequence-specific binding (GO:0000982)	31
GO_Molecular_Function_2018	ATP-dependent helicase activity (GO:0008026)	31
GO_Molecular_Function_2018	bitter taste receptor activity (GO:0033038)	30
GO_Molecular_Function_2018	transcriptional repressor activity, RNA polymerase II core promoter proximal region sequence-specific binding (GO:0001078)	30
GO_Molecular_Function_2018	solute:proton symporter activity (GO:0015295)	30
GO_Molecular_Function_2018	taste receptor activity (GO:0008527)	29
GO_Molecular_Function_2018	hydrogen:amino acid symporter activity (GO:0005280)	29
GO_Molecular_Function_2018	sterol binding (GO:0032934)	28
GO_Molecular_Function_2018	phosphatidylinositol transporter activity (GO:0008526)	28
GO_Molecular_Function_2018	neurotrophin TRK receptor binding (GO:0005167)	28
GO_Molecular_Function_2018	mitogen-activated protein kinase binding (GO:0051019)	27
GO_Molecular_Function_2018	chemokine activity (GO:0008009)	27
GO_Molecular_Function_2018	endopeptidase inhibitor activity (GO:0004866)	27
GO_Molecular_Function_2018	RNA polymerase II regulatory region sequence-specific DNA binding (GO:0000977)	27
GO_Molecular_Function_2018	phosphatase binding (GO:0019902)	27
GO_Molecular_Function_2018	phosphatidylinositol phosphate binding (GO:1901981)	27
GO_Molecular_Function_2018	phosphatidylinositol-3,4,5-trisphosphate binding (GO:0005547)	26
GO_Molecular_Function_2018	protein channel activity (GO:0015266)	26
GO_Molecular_Function_2018	chemokine receptor binding (GO:0042379)	26
GO_Molecular_Function_2018	protein homodimerization activity (GO:0042803)	26
GO_Molecular_Function_2018	histone methyltransferase activity (H3-K36 specific) (GO:0046975)	25
GO_Molecular_Function_2018	GTPase activator activity (GO:0005096)	25
GO_Molecular_Function_2018	carboxylic acid transmembrane transporter activity (GO:0046943)	25
GO_Molecular_Function_2018	inositol trisphosphate kinase activity (GO:0051766)	24
GO_Molecular_Function_2018	histone methyltransferase activity (H3-K4 specific) (GO:0042800)	24
GO_Molecular_Function_2018	tropomyosin binding (GO:0005523)	23
GO_Molecular_Function_2018	motor activity (GO:0003774)	23
GO_Molecular_Function_2018	Ras GTPase binding (GO:0017016)	23
GO_Molecular_Function_2018	phosphatidylinositol-4,5-bisphosphate binding (GO:0005546)	23
GO_Molecular_Function_2018	frizzled binding (GO:0005109)	22
GO_Molecular_Function_2018	adenyl ribonucleotide binding (GO:0032559)	22
GO_Molecular_Function_2018	phosphatidylcholine 1-acylhydrolase activity (GO:0008970)	22
GO_Molecular_Function_2018	monoamine transmembrane transporter activity (GO:0008504)	22
GO_Molecular_Function_2018	protease binding (GO:0002020)	21
GO_Molecular_Function_2018	secondary active transmembrane transporter activity (GO:0015291)	21
GO_Molecular_Function_2018	zinc ion binding (GO:0008270)	21
GO_Molecular_Function_2018	galanin receptor activity (GO:0004966)	21
GO_Molecular_Function_2018	calcium channel activity (GO:0005262)	21
GO_Molecular_Function_2018	Rab GTPase binding (GO:0017137)	21
GO_Molecular_Function_2018	extracellular ATP-gated cation channel activity (GO:0004931)	21
GO_Molecular_Function_2018	ATP-gated ion channel activity (GO:0035381)	21
GO_Molecular_Function_2018	nucleotide receptor activity (GO:0016502)	21
GO_Molecular_Function_2018	phosphoprotein phosphatase activity (GO:0004721)	21
GO_Molecular_Function_2018	dopamine transmembrane transporter activity (GO:0005329)	21
GO_Molecular_Function_2018	flap endonuclease activity (GO:0048256)	21
GO_Molecular_Function_2018	insulin-like growth factor receptor binding (GO:0005159)	21
GO_Molecular_Function_2018	cadherin binding (GO:0045296)	21
GO_Molecular_Function_2018	WW domain binding (GO:0050699)	21
GO_Molecular_Function_2018	hydrogen ion transmembrane transporter activity (GO:0015078)	21
GO_Molecular_Function_2018	channel activity (GO:0015267)	20
GO_Molecular_Function_2018	kinase inhibitor activity (GO:0019210)	20
GO_Molecular_Function_2018	protein tyrosine/serine/threonine phosphatase activity (GO:0008138)	20
GO_Molecular_Function_2018	RNA polymerase II core promoter proximal region sequence-specific DNA binding (GO:0000978)	20
GO_Molecular_Function_2018	phosphatidylcholine-sterol O-acyltransferase activator activity (GO:0060228)	20
GO_Molecular_Function_2018	kinase binding (GO:0019900)	20
GO_Molecular_Function_2018	microfilament motor activity (GO:0000146)	19
GO_Molecular_Function_2018	protein-disulfide reductase activity (GO:0047134)	19
GO_Molecular_Function_2018	oxidoreductase activity, acting on a sulfur group of donors, NAD(P) as acceptor (GO:0016668)	19
GO_Molecular_Function_2018	protein kinase inhibitor activity (GO:0004860)	19
GO_Molecular_Function_2018	transcription factor activity, RNA polymerase II distal enhancer sequence-specific binding (GO:0003705)	19
GO_Molecular_Function_2018	actin filament binding (GO:0051015)	18
GO_Molecular_Function_2018	CARD domain binding (GO:0050700)	18
GO_Molecular_Function_2018	neurotrophin binding (GO:0043121)	18
GO_Molecular_Function_2018	lipoprotein particle binding (GO:0071813)	18
GO_Molecular_Function_2018	U3 snoRNA binding (GO:0034511)	18
GO_Molecular_Function_2018	microtubule motor activity (GO:0003777)	18
GO_Molecular_Function_2018	cation channel activity (GO:0005261)	18
GO_Molecular_Function_2018	palmitoyl-CoA hydrolase activity (GO:0016290)	18
GO_Molecular_Function_2018	protein phosphatase binding (GO:0019903)	17
GO_Molecular_Function_2018	protein serine/threonine kinase activator activity (GO:0043539)	17
GO_Molecular_Function_2018	calmodulin-dependent protein kinase activity (GO:0004683)	17
GO_Molecular_Function_2018	endonuclease activity (GO:0004519)	17
GO_Molecular_Function_2018	triglyceride lipase activity (GO:0004806)	17
GO_Molecular_Function_2018	interleukin-17 receptor activity (GO:0030368)	17
GO_Molecular_Function_2018	low-density lipoprotein particle binding (GO:0030169)	17
GO_Molecular_Function_2018	endoribonuclease activity (GO:0004521)	17
GO_Molecular_Function_2018	quaternary ammonium group transmembrane transporter activity (GO:0015651)	17
GO_Molecular_Function_2018	ADP-ribosylation factor binding (GO:0030306)	17
GO_Molecular_Function_2018	sterol transporter activity (GO:0015248)	17
GO_Molecular_Function_2018	ATPase binding (GO:0051117)	16
GO_Molecular_Function_2018	transition metal ion binding (GO:0046914)	16
GO_Molecular_Function_2018	ubiquitin protein ligase binding (GO:0031625)	16
GO_Molecular_Function_2018	protein heterodimerization activity (GO:0046982)	16
GO_Molecular_Function_2018	ribonuclease activity (GO:0004540)	16
GO_Molecular_Function_2018	metalloendopeptidase activity (GO:0004222)	16
GO_Molecular_Function_2018	nuclease activity (GO:0004518)	16
GO_Molecular_Function_2018	voltage-gated calcium channel activity (GO:0005245)	16
GO_Molecular_Function_2018	hexosaminidase activity (GO:0015929)	16
GO_Molecular_Function_2018	aldehyde-lyase activity (GO:0016832)	16
GO_Molecular_Function_2018	four-way junction DNA binding (GO:0000400)	16
GO_Molecular_Function_2018	phospholipase C activity (GO:0004629)	16
GO_Molecular_Function_2018	aminoacyl-tRNA ligase activity (GO:0004812)	16
GO_Molecular_Function_2018	metal ion transmembrane transporter activity (GO:0046873)	16
GO_Molecular_Function_2018	transcription regulatory region DNA binding (GO:0044212)	16
GO_Molecular_Function_2018	telomerase RNA binding (GO:0070034)	16
GO_Molecular_Function_2018	sterol esterase activity (GO:0004771)	15
GO_Molecular_Function_2018	olfactory receptor activity (GO:0004984)	15
GO_Molecular_Function_2018	sodium ion binding (GO:0031402)	15
GO_Molecular_Function_2018	caspase binding (GO:0089720)	15
GO_Molecular_Function_2018	core promoter proximal region sequence-specific DNA binding (GO:0000987)	15
GO_Molecular_Function_2018	GTPase regulator activity (GO:0030695)	15
GO_Molecular_Function_2018	DNA polymerase binding (GO:0070182)	15
GO_Molecular_Function_2018	actin binding (GO:0003779)	15
GO_Molecular_Function_2018	cation transmembrane transporter activity (GO:0008324)	15
GO_Molecular_Function_2018	phosphatidic acid transporter activity (GO:1990050)	15
GO_Molecular_Function_2018	RNA polymerase II transcription factor activity, sequence-specific transcription regulatory region DNA binding (GO:0001133)	14
GO_Molecular_Function_2018	ion antiporter activity (GO:0099516)	14
GO_Molecular_Function_2018	amide transmembrane transporter activity (GO:0042887)	14
GO_Molecular_Function_2018	cholesterol binding (GO:0015485)	14
GO_Molecular_Function_2018	tRNA-specific ribonuclease activity (GO:0004549)	14
GO_Molecular_Function_2018	acetylcholine receptor activity (GO:0015464)	14
GO_Molecular_Function_2018	calcium-dependent phospholipase A2 activity (GO:0047498)	14
GO_Molecular_Function_2018	protein transmembrane transporter activity (GO:0008320)	14
GO_Molecular_Function_2018	single-stranded DNA exodeoxyribonuclease activity (GO:0008297)	14
GO_Molecular_Function_2018	nucleosomal DNA binding (GO:0031492)	14
GO_Molecular_Function_2018	acyl-CoA hydrolase activity (GO:0047617)	13
GO_Molecular_Function_2018	peptidyl-proline dioxygenase activity (GO:0031543)	13
GO_Molecular_Function_2018	calcium-dependent phospholipid binding (GO:0005544)	13
GO_Molecular_Function_2018	protein phosphatase 2A binding (GO:0051721)	13
GO_Molecular_Function_2018	RNA polymerase II repressing transcription factor binding (GO:0001103)	13
GO_Molecular_Function_2018	semaphorin receptor binding (GO:0030215)	13
GO_Molecular_Function_2018	G-protein coupled peptide receptor activity (GO:0008528)	13
GO_Molecular_Function_2018	death domain binding (GO:0070513)	13
GO_Molecular_Function_2018	calcium-dependent protein kinase activity (GO:0010857)	13
GO_Molecular_Function_2018	ubiquitin-like protein ligase binding (GO:0044389)	12
GO_Molecular_Function_2018	inorganic anion exchanger activity (GO:0005452)	12
GO_Molecular_Function_2018	pre-mRNA binding (GO:0036002)	12
GO_Molecular_Function_2018	ion channel activity (GO:0005216)	12
GO_Molecular_Function_2018	urea transmembrane transporter activity (GO:0015204)	12
GO_Molecular_Function_2018	substrate-specific channel activity (GO:0022838)	12
GO_Molecular_Function_2018	glucose:sodium symporter activity (GO:0005412)	12
GO_Molecular_Function_2018	LRR domain binding (GO:0030275)	12
GO_Molecular_Function_2018	1-phosphatidylinositol-3-kinase activity (GO:0016303)	12
GO_Molecular_Function_2018	sequence-specific DNA binding (GO:0043565)	11
GO_Molecular_Function_2018	calcium-dependent protein serine/threonine kinase activity (GO:0009931)	11
GO_Molecular_Function_2018	P-P-bond-hydrolysis-driven transmembrane transporter activity (GO:0015405)	11
GO_Molecular_Function_2018	ATPase activity, coupled to movement of substances (GO:0043492)	11
GO_Molecular_Function_2018	DNA secondary structure binding (GO:0000217)	11
GO_Molecular_Function_2018	R-SMAD binding (GO:0070412)	11
GO_Molecular_Function_2018	cytokine receptor binding (GO:0005126)	11
GO_Molecular_Function_2018	G-protein coupled chemoattractant receptor activity (GO:0001637)	11
GO_Molecular_Function_2018	protein kinase binding (GO:0019901)	11
GO_Molecular_Function_2018	GTP binding (GO:0005525)	11
GO_Molecular_Function_2018	interleukin-6 receptor binding (GO:0005138)	11
GO_Molecular_Function_2018	titin binding (GO:0031432)	10
GO_Molecular_Function_2018	organic acid transmembrane transporter activity (GO:0005342)	10
GO_Molecular_Function_2018	calcium ion transmembrane transporter activity (GO:0015085)	10
GO_Molecular_Function_2018	purine ribonucleoside binding (GO:0032550)	10
GO_Molecular_Function_2018	gamma-tubulin binding (GO:0043015)	10
GO_Molecular_Function_2018	protein serine/threonine kinase activity (GO:0004674)	10
GO_Molecular_Function_2018	transcriptional repressor activity, RNA polymerase II transcription regulatory region sequence-specific binding (GO:0001227)	10
GO_Molecular_Function_2018	collagen binding (GO:0005518)	10
GO_Molecular_Function_2018	phospholipase A2 activity (GO:0004623)	10
GO_Molecular_Function_2018	phosphatidylinositol kinase activity (GO:0052742)	10
GO_Molecular_Function_2018	proton-transporting ATP synthase activity, rotational mechanism (GO:0046933)	10
GO_Molecular_Function_2018	aminopeptidase activity (GO:0004177)	10
GO_Molecular_Function_2018	peptidyl-proline 4-dioxygenase activity (GO:0031545)	9
GO_Molecular_Function_2018	alanine transmembrane transporter activity (GO:0022858)	9
GO_Molecular_Function_2018	L-alanine transmembrane transporter activity (GO:0015180)	9
GO_Molecular_Function_2018	microtubule binding (GO:0008017)	9
GO_Molecular_Function_2018	phosphatidylinositol bisphosphate binding (GO:1902936)	9
GO_Molecular_Function_2018	metallopeptidase activity (GO:0008237)	9
GO_Molecular_Function_2018	intermediate filament binding (GO:0019215)	8
GO_Molecular_Function_2018	ATPase regulator activity (GO:0060590)	8
GO_Molecular_Function_2018	ubiquitin conjugating enzyme activity (GO:0061631)	8
GO_Molecular_Function_2018	arylsulfatase activity (GO:0004065)	8
GO_Molecular_Function_2018	sulfuric ester hydrolase activity (GO:0008484)	8
GO_Molecular_Function_2018	O-acyltransferase activity (GO:0008374)	8
GO_Molecular_Function_2018	endodeoxyribonuclease activity (GO:0004520)	8
GO_Molecular_Function_2018	core promoter sequence-specific DNA binding (GO:0001046)	8
GO_Molecular_Function_2018	leak channel activity (GO:0022840)	8
GO_Molecular_Function_2018	potassium ion leak channel activity (GO:0022841)	8
GO_Molecular_Function_2018	death receptor activity (GO:0005035)	8
GO_Molecular_Function_2018	tumor necrosis factor-activated receptor activity (GO:0005031)	8
GO_Molecular_Function_2018	phosphatidylinositol phospholipase C activity (GO:0004435)	8
GO_Molecular_Function_2018	phosphatidylinositol-5-phosphate binding (GO:0010314)	8
GO_Molecular_Function_2018	ATP-dependent DNA helicase activity (GO:0004003)	8
GO_Molecular_Function_2018	phosphatidylethanolamine binding (GO:0008429)	8
GO_Molecular_Function_2018	retinoic acid receptor binding (GO:0042974)	7
GO_Molecular_Function_2018	adenyl nucleotide binding (GO:0030554)	7
GO_Molecular_Function_2018	adenyl-nucleotide exchange factor activity (GO:0000774)	7
GO_Molecular_Function_2018	ligand-gated sodium channel activity (GO:0015280)	7
GO_Molecular_Function_2018	disulfide oxidoreductase activity (GO:0015036)	7
GO_Molecular_Function_2018	protein serine/threonine phosphatase activity (GO:0004722)	7
GO_Molecular_Function_2018	monovalent inorganic cation transmembrane transporter activity (GO:0015077)	7
GO_Molecular_Function_2018	aspartic-type peptidase activity (GO:0070001)	7
GO_Molecular_Function_2018	microtubule minus-end binding (GO:0051011)	7
GO_Molecular_Function_2018	divalent inorganic cation transmembrane transporter activity (GO:0072509)	7
GO_Molecular_Function_2018	crossover junction endodeoxyribonuclease activity (GO:0008821)	7
GO_Molecular_Function_2018	copper ion binding (GO:0005507)	7
GO_Molecular_Function_2018	bHLH transcription factor binding (GO:0043425)	7
GO_Molecular_Function_2018	RNA polymerase III activity (GO:0001056)	7
GO_Molecular_Function_2018	phosphatidylinositol bisphosphate kinase activity (GO:0052813)	7
GO_Molecular_Function_2018	omega peptidase activity (GO:0008242)	7
GO_Molecular_Function_2018	transcriptional activator activity, RNA polymerase II core promoter proximal region sequence-specific binding (GO:0001077)	7
GO_Molecular_Function_2018	cytokine activity (GO:0005125)	6
GO_Molecular_Function_2018	histone deacetylase activity (GO:0004407)	6
GO_Molecular_Function_2018	ubiquitin-like protein conjugating enzyme activity (GO:0061650)	6
GO_Molecular_Function_2018	1-phosphatidylinositol-4-phosphate 5-kinase activity (GO:0016308)	6
GO_Molecular_Function_2018	sodium:amino acid symporter activity (GO:0005283)	6
GO_Molecular_Function_2018	ligand-dependent nuclear receptor transcription coactivator activity (GO:0030374)	6
GO_Molecular_Function_2018	neuropeptide receptor activity (GO:0008188)	6
GO_Molecular_Function_2018	G-protein beta/gamma-subunit complex binding (GO:0031683)	6
GO_Molecular_Function_2018	excitatory extracellular ligand-gated ion channel activity (GO:0005231)	6
GO_Molecular_Function_2018	I-SMAD binding (GO:0070411)	6
GO_Molecular_Function_2018	ankyrin binding (GO:0030506)	6
GO_Molecular_Function_2018	phosphatidylinositol monophosphate phosphatase activity (GO:0052744)	6
GO_Molecular_Function_2018	phosphatidylinositol-3-phosphatase activity (GO:0004438)	6
GO_Molecular_Function_2018	inorganic cation transmembrane transporter activity (GO:0022890)	6
GO_Molecular_Function_2018	guanyl ribonucleotide binding (GO:0032561)	6
GO_Molecular_Function_2018	G-protein activated inward rectifier potassium channel activity (GO:0015467)	6
GO_Molecular_Function_2018	lipoprotein lipase activity (GO:0004465)	6
GO_Molecular_Function_2018	N-acetylglucosamine 6-O-sulfotransferase activity (GO:0001517)	6
GO_Molecular_Function_2018	glutamate receptor binding (GO:0035254)	6
GO_Molecular_Function_2018	ubiquitin-ubiquitin ligase activity (GO:0034450)	6
GO_Molecular_Function_2018	ligand-gated cation channel activity (GO:0099094)	6
GO_Molecular_Function_2018	single-stranded telomeric DNA binding (GO:0043047)	6
GO_Molecular_Function_2018	DNA binding (GO:0003677)	6
GO_Molecular_Function_2018	protein kinase A regulatory subunit binding (GO:0034237)	5
GO_Molecular_Function_2018	ether hydrolase activity (GO:0016803)	5
GO_Molecular_Function_2018	primary amine oxidase activity (GO:0008131)	5
GO_Molecular_Function_2018	carbonate dehydratase activity (GO:0004089)	5
GO_Molecular_Function_2018	neuropeptide binding (GO:0042923)	5
GO_Molecular_Function_2018	bicarbonate transmembrane transporter activity (GO:0015106)	5
GO_Molecular_Function_2018	semaphorin receptor activity (GO:0017154)	5
GO_Molecular_Function_2018	vasopressin receptor activity (GO:0005000)	5
GO_Molecular_Function_2018	methylation-dependent protein binding (GO:0140034)	5
GO_Molecular_Function_2018	[heparan sulfate]-glucosamine 3-sulfotransferase 1 activity (GO:0008467)	5
GO_Molecular_Function_2018	ATPase activity, coupled to transmembrane movement of substances (GO:0042626)	5
GO_Molecular_Function_2018	phosphotransferase activity, alcohol group as acceptor (GO:0016773)	5
GO_Molecular_Function_2018	MAP kinase activity (GO:0004707)	5
GO_Molecular_Function_2018	type I interferon receptor binding (GO:0005132)	5
GO_Molecular_Function_2018	sodium:potassium-exchanging ATPase activity (GO:0005391)	5
GO_Molecular_Function_2018	potassium-transporting ATPase activity (GO:0008556)	5
GO_Molecular_Function_2018	nitric-oxide synthase binding (GO:0050998)	5
GO_Molecular_Function_2018	RNA stem-loop binding (GO:0035613)	5
GO_Molecular_Function_2018	PDZ domain binding (GO:0030165)	5
GO_Molecular_Function_2018	cholesterol transporter activity (GO:0017127)	5
GO_Molecular_Function_2018	lipoprotein particle receptor binding (GO:0070325)	5
GO_Molecular_Function_2018	phosphatidylcholine transporter activity (GO:0008525)	5
GO_Molecular_Function_2018	endodeoxyribonuclease activity, producing 3'-phosphomonoesters (GO:0016889)	5
GO_Molecular_Function_2018	cysteine-type endopeptidase inhibitor activity involved in apoptotic process (GO:0043027)	5
GO_Molecular_Function_2018	cation:cation antiporter activity (GO:0015491)	5
GO_Molecular_Function_2018	exonuclease activity (GO:0004527)	5
GO_Molecular_Function_2018	monocarboxylic acid transmembrane transporter activity (GO:0008028)	5
GO_Molecular_Function_2018	telomeric DNA binding (GO:0042162)	5
GO_Molecular_Function_2018	hydrogen-exporting ATPase activity (GO:0036442)	5
GO_Molecular_Function_2018	ATPase activity, coupled to transmembrane movement of ions, rotational mechanism (GO:0044769)	5
GO_Molecular_Function_2018	phosphatidylinositol 3-kinase activity (GO:0035004)	5
GO_Molecular_Function_2018	regulatory region DNA binding (GO:0000975)	5
GO_Molecular_Function_2018	metalloaminopeptidase activity (GO:0070006)	5
GO_Molecular_Function_2018	hyaluronic acid binding (GO:0005540)	5
GO_Molecular_Function_2018	lipase activator activity (GO:0060229)	5
GO_Molecular_Function_2018	inward rectifier potassium channel activity (GO:0005242)	5
GO_Molecular_Function_2018	exopeptidase activity (GO:0008238)	5
GO_Molecular_Function_2018	G-rich strand telomeric DNA binding (GO:0098505)	5
GO_Molecular_Function_2018	protein transporter activity (GO:0008565)	5
GO_Molecular_Function_2018	SH3/SH2 adaptor activity (GO:0005070)	5
GO_Molecular_Function_2018	calcium channel inhibitor activity (GO:0019855)	4
GO_Molecular_Function_2018	MHC class I receptor activity (GO:0032393)	4
GO_Molecular_Function_2018	CoA hydrolase activity (GO:0016289)	4
GO_Molecular_Function_2018	calcium channel regulator activity (GO:0005246)	4
GO_Molecular_Function_2018	basal RNA polymerase II transcription machinery binding (GO:0001099)	4
GO_Molecular_Function_2018	phosphofructokinase activity (GO:0008443)	4
GO_Molecular_Function_2018	calcium-dependent cysteine-type endopeptidase activity (GO:0004198)	4
GO_Molecular_Function_2018	protein deacetylase activity (GO:0033558)	4
GO_Molecular_Function_2018	protein kinase activator activity (GO:0030295)	4
GO_Molecular_Function_2018	double-stranded DNA binding (GO:0003690)	4
GO_Molecular_Function_2018	deoxyribonuclease activity (GO:0004536)	4
GO_Molecular_Function_2018	high voltage-gated calcium channel activity (GO:0008331)	4
GO_Molecular_Function_2018	methylated histone binding (GO:0035064)	4
GO_Molecular_Function_2018	histone-lysine N-methyltransferase activity (GO:0018024)	4
GO_Molecular_Function_2018	transcriptional activator activity, RNA polymerase II transcription regulatory region sequence-specific binding (GO:0001228)	4
GO_Molecular_Function_2018	fatty acid ligase activity (GO:0015645)	4
GO_Molecular_Function_2018	single-stranded DNA-dependent ATPase activity (GO:0043142)	4
GO_Molecular_Function_2018	G-protein coupled receptor binding (GO:0001664)	4
GO_Molecular_Function_2018	vascular endothelial growth factor-activated receptor activity (GO:0005021)	4
GO_Molecular_Function_2018	aspartic-type endopeptidase activity (GO:0004190)	4
GO_Molecular_Function_2018	voltage-gated ion channel activity involved in regulation of postsynaptic membrane potential (GO:1905030)	4
GO_Molecular_Function_2018	lipase activity (GO:0016298)	4
GO_Molecular_Function_2018	interleukin-1 receptor binding (GO:0005149)	4
GO_Molecular_Function_2018	oxidoreductase activity, acting on a sulfur group of donors, disulfide as acceptor (GO:0016671)	4
GO_Molecular_Function_2018	DNA-directed 5'-3' RNA polymerase activity (GO:0003899)	4
GO_Molecular_Function_2018	sequence-specific double-stranded DNA binding (GO:1990837)	4
GO_Molecular_Function_2018	RNA polymerase II regulatory region DNA binding (GO:0001012)	4
GO_Molecular_Function_2018	ubiquitin protein ligase activity (GO:0061630)	4
GO_Molecular_Function_2018	hydrolase activity, acting on carbon-nitrogen (but not peptide) bonds, in linear amides (GO:0016811)	4
GO_Molecular_Function_2018	methyl-CpG binding (GO:0008327)	4
GO_Molecular_Function_2018	hydrolase activity, acting on acid anhydrides, catalyzing transmembrane movement of substances (GO:0016820)	4
GO_Molecular_Function_2018	phosphatidylinositol binding (GO:0035091)	4
GO_Molecular_Function_2018	natural killer cell lectin-like receptor binding (GO:0046703)	4
GO_Molecular_Function_2018	phosphatidylinositol-4,5-bisphosphate 3-kinase activity (GO:0046934)	4
GO_Molecular_Function_2018	aryl sulfotransferase activity (GO:0004062)	4
GO_Molecular_Function_2018	fibroblast growth factor receptor binding (GO:0005104)	4
GO_Molecular_Function_2018	double-stranded telomeric DNA binding (GO:0003691)	4
GO_Molecular_Function_2018	actin-dependent ATPase activity (GO:0030898)	4
GO_Molecular_Function_2018	repressing transcription factor binding (GO:0070491)	4
GO_Molecular_Function_2018	phosphatidic acid binding (GO:0070300)	4
GO_Molecular_Function_2018	galactosyltransferase activity (GO:0008378)	4
GO_Molecular_Function_2018	GTPase activity (GO:0003924)	4
GO_Molecular_Function_2018	m7G(5')pppN diphosphatase activity (GO:0050072)	4
GO_Molecular_Function_2018	lipoprotein transporter activity (GO:0042954)	4
GO_Molecular_Function_2018	protein tyrosine phosphatase activity (GO:0004725)	4
GO_Molecular_Function_2018	transmembrane receptor protein tyrosine phosphatase activity (GO:0005001)	4
GO_Molecular_Function_2018	transmembrane receptor protein phosphatase activity (GO:0019198)	4
GO_Molecular_Function_2018	bile acid binding (GO:0032052)	4
GO_Molecular_Function_2018	complement receptor activity (GO:0004875)	3
GO_Molecular_Function_2018	RNA polymerase II core binding (GO:0000993)	3
GO_Molecular_Function_2018	ion channel inhibitor activity (GO:0008200)	3
GO_Molecular_Function_2018	prenyltransferase activity (GO:0004659)	3
GO_Molecular_Function_2018	alkali metal ion binding (GO:0031420)	3
GO_Molecular_Function_2018	tRNA (guanine) methyltransferase activity (GO:0016423)	3
GO_Molecular_Function_2018	chloride channel inhibitor activity (GO:0019869)	3
GO_Molecular_Function_2018	phospholipase activator activity (GO:0016004)	3
GO_Molecular_Function_2018	NEDD8-specific protease activity (GO:0019784)	3
GO_Molecular_Function_2018	anion:cation symporter activity (GO:0015296)	3
GO_Molecular_Function_2018	cysteine-type endopeptidase activity (GO:0004197)	3
GO_Molecular_Function_2018	cysteine-type peptidase activity (GO:0008234)	3
GO_Molecular_Function_2018	voltage-gated cation channel activity (GO:0022843)	3
GO_Molecular_Function_2018	MHC protein complex binding (GO:0023023)	3
GO_Molecular_Function_2018	immunoglobulin binding (GO:0019865)	3
GO_Molecular_Function_2018	transcription corepressor activity (GO:0003714)	3
GO_Molecular_Function_2018	microtubule-severing ATPase activity (GO:0008568)	3
GO_Molecular_Function_2018	aldehyde dehydrogenase (NAD) activity (GO:0004029)	3
GO_Molecular_Function_2018	transferase activity, transferring acyl groups other than amino-acyl groups (GO:0016747)	3
GO_Molecular_Function_2018	mechanically-gated ion channel activity (GO:0008381)	3
GO_Molecular_Function_2018	cyclin-dependent protein serine/threonine kinase activity (GO:0004693)	3
GO_Molecular_Function_2018	vinculin binding (GO:0017166)	3
GO_Molecular_Function_2018	insulin receptor binding (GO:0005158)	3
GO_Molecular_Function_2018	pseudouridine synthase activity (GO:0009982)	3
GO_Molecular_Function_2018	ATP-dependent microtubule motor activity (GO:1990939)	3
GO_Molecular_Function_2018	oxidoreductase activity, acting on single donors with incorporation of molecular oxygen, incorporation of two atoms of oxygen (GO:0016702)	3
GO_Molecular_Function_2018	cAMP-dependent protein kinase regulator activity (GO:0008603)	3
GO_Molecular_Function_2018	ATPase activator activity (GO:0001671)	3
GO_Molecular_Function_2018	phosphotransferase activity, for other substituted phosphate groups (GO:0016780)	3
GO_Molecular_Function_2018	bubble DNA binding (GO:0000405)	3
GO_Molecular_Function_2018	core promoter binding (GO:0001047)	3
GO_Molecular_Function_2018	phospholipid transporter activity (GO:0005548)	3
GO_Molecular_Function_2018	ATPase activity (GO:0016887)	3
GO_Molecular_Function_2018	sulfotransferase activity (GO:0008146)	3
GO_Molecular_Function_2018	MHC class II protein complex binding (GO:0023026)	3
GO_Molecular_Function_2018	transcription regulatory region sequence-specific DNA binding (GO:0000976)	3
GO_Molecular_Function_2018	ubiquitin-like protein ligase activity (GO:0061659)	3
GO_Molecular_Function_2018	phospholipase activity (GO:0004620)	3
GO_Molecular_Function_2018	lysophospholipase activity (GO:0004622)	3
GO_Molecular_Function_2018	chitinase activity (GO:0004568)	3
GO_Molecular_Function_2018	sugar:proton symporter activity (GO:0005351)	3
GO_Molecular_Function_2018	amyloid-beta binding (GO:0001540)	3
GO_Molecular_Function_2018	growth factor receptor binding (GO:0070851)	3
GO_Molecular_Function_2018	5'-3' RNA polymerase activity (GO:0034062)	3
GO_Molecular_Function_2018	dynein complex binding (GO:0070840)	3
GO_Molecular_Function_2018	JUN kinase binding (GO:0008432)	3
GO_Molecular_Function_2018	aldehyde dehydrogenase [NAD(P)+] activity (GO:0004030)	3
GO_Molecular_Function_2018	opioid receptor activity (GO:0004985)	3
GO_Molecular_Function_2018	RNA polymerase II carboxy-terminal domain kinase activity (GO:0008353)	3
GO_Molecular_Function_2018	Toll-like receptor binding (GO:0035325)	3
GO_Molecular_Function_2018	DNA-dependent ATPase activity (GO:0008094)	3
GO_Molecular_Function_2018	phosphorylase activity (GO:0004645)	3
GO_Molecular_Function_2018	serine-type carboxypeptidase activity (GO:0004185)	3
GO_Molecular_Function_2018	serine-type exopeptidase activity (GO:0070008)	3
GO_Molecular_Function_2018	manganese ion transmembrane transporter activity (GO:0005384)	3
GO_Molecular_Function_2018	phosphatidylinositol-3-phosphate binding (GO:0032266)	3
GO_Molecular_Function_2018	1-phosphatidylinositol binding (GO:0005545)	3
GO_Molecular_Function_2018	alcohol dehydrogenase activity, zinc-dependent (GO:0004024)	3
GO_Molecular_Function_2018	FK506 binding (GO:0005528)	3
GO_Molecular_Function_2018	patched binding (GO:0005113)	3
GO_Molecular_Function_2018	Tat protein binding (GO:0030957)	3
GO_Molecular_Function_2018	myosin V binding (GO:0031489)	3
GO_Molecular_Function_2018	fucosyltransferase activity (GO:0008417)	3
GO_Molecular_Function_2018	peptide transmembrane transporter activity (GO:1904680)	3
GO_Molecular_Function_2018	peptidase inhibitor activity (GO:0030414)	3
GO_Molecular_Function_2018	cAMP-dependent protein kinase inhibitor activity (GO:0004862)	3
GO_Molecular_Function_2018	guanylate kinase activity (GO:0004385)	3
GO_Molecular_Function_2018	RNA polymerase II basal transcription factor binding (GO:0001091)	3
GO_Molecular_Function_2018	arylesterase activity (GO:0004064)	3
GO_Molecular_Function_2018	anion:anion antiporter activity (GO:0015301)	3
GO_Molecular_Function_2018	phosphatidylinositol 3-kinase regulator activity (GO:0035014)	3
GO_Molecular_Function_2018	oxidoreductase activity, oxidizing metal ions, NAD or NADP as acceptor (GO:0016723)	3
GO_Molecular_Function_2018	calcium activated cation channel activity (GO:0005227)	2
GO_Molecular_Function_2018	DNA ligase activity (GO:0003909)	2
GO_Molecular_Function_2018	ion gated channel activity (GO:0022839)	2
GO_Molecular_Function_2018	intronic transcription regulatory region sequence-specific DNA binding (GO:0001161)	2
GO_Molecular_Function_2018	NADP-retinol dehydrogenase activity (GO:0052650)	2
GO_Molecular_Function_2018	3-chloroallyl aldehyde dehydrogenase activity (GO:0004028)	2
GO_Molecular_Function_2018	potassium ion binding (GO:0030955)	2
GO_Molecular_Function_2018	sodium ion transmembrane transporter activity (GO:0015081)	2
GO_Molecular_Function_2018	protein serine/threonine/tyrosine kinase activity (GO:0004712)	2
GO_Molecular_Function_2018	neutral amino acid transmembrane transporter activity (GO:0015175)	2
GO_Molecular_Function_2018	amino acid transmembrane transporter activity (GO:0015171)	2
GO_Molecular_Function_2018	glycine transmembrane transporter activity (GO:0015187)	2
GO_Molecular_Function_2018	N-acyltransferase activity (GO:0016410)	2
GO_Molecular_Function_2018	intracellular calcium activated chloride channel activity (GO:0005229)	2
GO_Molecular_Function_2018	intracellular chloride channel activity (GO:0061778)	2
GO_Molecular_Function_2018	ubiquitin-like protein conjugating enzyme binding (GO:0044390)	2
GO_Molecular_Function_2018	RNA polymerase II core promoter sequence-specific DNA binding (GO:0000979)	2
GO_Molecular_Function_2018	acylglycerol O-acyltransferase activity (GO:0016411)	2
GO_Molecular_Function_2018	protein-lysine N-methyltransferase activity (GO:0016279)	2
GO_Molecular_Function_2018	1-acylglycerol-3-phosphate O-acyltransferase activity (GO:0003841)	2
GO_Molecular_Function_2018	LBD domain binding (GO:0050693)	2
GO_Molecular_Function_2018	2-acylglycerol-3-phosphate O-acyltransferase activity (GO:0047144)	2
GO_Molecular_Function_2018	intramolecular oxidoreductase activity, transposing S-S bonds (GO:0016864)	2
GO_Molecular_Function_2018	protein disulfide isomerase activity (GO:0003756)	2
GO_Molecular_Function_2018	tau-protein kinase activity (GO:0050321)	2
GO_Molecular_Function_2018	poly(G) binding (GO:0034046)	2
GO_Molecular_Function_2018	lysine N-methyltransferase activity (GO:0016278)	2
GO_Molecular_Function_2018	heparan sulfate sulfotransferase activity (GO:0034483)	2
GO_Molecular_Function_2018	phosphatidylinositol-3,5-bisphosphate phosphatase activity (GO:0106018)	2
GO_Molecular_Function_2018	hyalurononglucosaminidase activity (GO:0004415)	2
GO_Molecular_Function_2018	SH3 domain binding (GO:0017124)	2
GO_Molecular_Function_2018	oxidoreductase activity, acting on NAD(P)H, oxygen as acceptor (GO:0050664)	2
GO_Molecular_Function_2018	ligand-gated ion channel activity (GO:0015276)	2
GO_Molecular_Function_2018	organic acid:sodium symporter activity (GO:0005343)	2
GO_Molecular_Function_2018	protein kinase regulator activity (GO:0019887)	2
GO_Molecular_Function_2018	phosphatidylinositol-3,5-bisphosphate 3-phosphatase activity (GO:0052629)	2
GO_Molecular_Function_2018	cyclin-dependent protein kinase activity (GO:0097472)	2
GO_Molecular_Function_2018	histone serine kinase activity (GO:0035174)	2
GO_Molecular_Function_2018	SUMO-specific protease activity (GO:0016929)	2
GO_Molecular_Function_2018	transforming growth factor beta binding (GO:0050431)	2
GO_Molecular_Function_2018	armadillo repeat domain binding (GO:0070016)	2
GO_Molecular_Function_2018	protein kinase C activity (GO:0004697)	2
GO_Molecular_Function_2018	tubulin binding (GO:0015631)	2
GO_Molecular_Function_2018	phosphoserine residue binding (GO:0050815)	2
GO_Molecular_Function_2018	MHC class II receptor activity (GO:0032395)	2
GO_Molecular_Function_2018	SUMO transferase activity (GO:0019789)	2
GO_Molecular_Function_2018	ATPase activity, coupled (GO:0042623)	2
GO_Molecular_Function_2018	transcriptional activator activity, RNA polymerase II distal enhancer sequence-specific binding (GO:0001205)	2
GO_Molecular_Function_2018	Ral GTPase binding (GO:0017160)	2
GO_Molecular_Function_2018	ammonium transmembrane transporter activity (GO:0008519)	2
GO_Molecular_Function_2018	dicarboxylic acid transmembrane transporter activity (GO:0005310)	2
GO_Molecular_Function_2018	zinc ion transmembrane transporter activity (GO:0005385)	2
GO_Molecular_Function_2018	small GTPase binding (GO:0031267)	2
GO_Molecular_Function_2018	GTPase binding (GO:0051020)	2
GO_Molecular_Function_2018	platelet-derived growth factor binding (GO:0048407)	2
GO_Molecular_Function_2018	snoRNA binding (GO:0030515)	2
GO_Molecular_Function_2018	GABA receptor binding (GO:0050811)	2
GO_Molecular_Function_2018	beta-tubulin binding (GO:0048487)	2
GO_Molecular_Function_2018	kinesin binding (GO:0019894)	2
GO_Molecular_Function_2018	peptidase activity, acting on L-amino acid peptides (GO:0070011)	2
GO_Molecular_Function_2018	G-protein coupled serotonin receptor activity (GO:0004993)	2
GO_Molecular_Function_2018	dipeptidase activity (GO:0016805)	2
GO_Molecular_Function_2018	serotonin receptor activity (GO:0099589)	2
GO_Molecular_Function_2018	RNA polymerase core enzyme binding (GO:0043175)	2
GO_Molecular_Function_2018	G-protein coupled glutamate receptor binding (GO:0035256)	2
GO_Molecular_Function_2018	trace-amine receptor activity (GO:0001594)	2
GO_Molecular_Function_2018	alpha-(1->3)-fucosyltransferase activity (GO:0046920)	2
GO_Molecular_Function_2018	exoribonuclease activity (GO:0004532)	2
GO_Molecular_Function_2018	endodeoxyribonuclease activity, producing 5'-phosphomonoesters (GO:0016888)	2
GO_Molecular_Function_2018	disordered domain specific binding (GO:0097718)	2
GO_Molecular_Function_2018	voltage-gated ion channel activity (GO:0005244)	2
GO_Molecular_Function_2018	intramolecular oxidoreductase activity, transposing C=C bonds (GO:0016863)	2
GO_Molecular_Function_2018	NADH dehydrogenase activity (GO:0003954)	2
GO_Molecular_Function_2018	peptide-lysine-N-acetyltransferase activity (GO:0061733)	2
GO_Molecular_Function_2018	phosphate ion binding (GO:0042301)	2
GO_Molecular_Function_2018	3'-5'-exodeoxyribonuclease activity (GO:0008296)	2
GO_Molecular_Function_2018	mRNA 3'-UTR binding (GO:0003730)	2
GO_Molecular_Function_2018	potassium ion transmembrane transporter activity (GO:0015079)	2
GO_Molecular_Function_2018	3'-5' exonuclease activity (GO:0008408)	2
GO_Molecular_Function_2018	sphingolipid transporter activity (GO:0046624)	2
GO_Molecular_Function_2018	transition metal ion transmembrane transporter activity (GO:0046915)	2
GO_Molecular_Function_2018	DNA-(apurinic or apyrimidinic site) lyase activity (GO:0003906)	2
GO_Molecular_Function_2018	glutathione transferase activity (GO:0004364)	2
GO_Molecular_Function_2018	proton-transporting ATPase activity, rotational mechanism (GO:0046961)	2
GO_Molecular_Function_2018	alpha-N-acetylneuraminate alpha-2,8-sialyltransferase activity (GO:0003828)	2
GO_Molecular_Function_2018	transcription factor activity, RNA polymerase II core promoter sequence-specific binding involved in preinitiation complex assembly (GO:0001075)	2
GO_Molecular_Function_2018	activin binding (GO:0048185)	2
GO_Molecular_Function_2018	oxidoreductase activity, acting on paired donors, with incorporation or reduction of molecular oxygen, NAD(P)H as one donor, and incorporation of one atom of oxygen (GO:0016709)	2
GO_Molecular_Function_2018	Notch binding (GO:0005112)	2
GO_Molecular_Function_2018	superoxide-generating NADPH oxidase activator activity (GO:0016176)	2
GO_Molecular_Function_2018	carnitine transmembrane transporter activity (GO:0015226)	2
GO_Molecular_Function_2018	amino-acid betaine transmembrane transporter activity (GO:0015199)	2
GO_Molecular_Function_2018	ionotropic glutamate receptor binding (GO:0035255)	2
GO_Molecular_Function_2018	histone deacetylase binding (GO:0042826)	2
GO_Molecular_Function_2018	oxidoreductase activity, acting on the CH-NH2 group of donors, oxygen as acceptor (GO:0016641)	2
GO_Molecular_Function_2018	ceramidase activity (GO:0017040)	2
GO_Molecular_Function_2018	Rho guanyl-nucleotide exchange factor activity (GO:0005089)	2
GO_Molecular_Function_2018	G-protein coupled nucleotide receptor activity (GO:0001608)	2
GO_Molecular_Function_2018	G-protein coupled purinergic nucleotide receptor activity (GO:0045028)	2
GO_Molecular_Function_2018	arachidonic acid monooxygenase activity (GO:0008391)	2
GO_Molecular_Function_2018	arachidonic acid epoxygenase activity (GO:0008392)	2
GO_Molecular_Function_2018	steroid dehydrogenase activity, acting on the CH-OH group of donors, NAD or NADP as acceptor (GO:0033764)	2
GO_Molecular_Function_2018	calcium-transporting ATPase activity (GO:0005388)	2
GO_Molecular_Function_2018	ATPase activity, coupled to transmembrane movement of ions, phosphorylative mechanism (GO:0015662)	2
GO_Molecular_Function_2018	beta-galactoside (CMP) alpha-2,3-sialyltransferase activity (GO:0003836)	2
GO_Molecular_Function_2018	peptidoglycan binding (GO:0042834)	2
GO_Molecular_Function_2018	hydrogen-exporting ATPase activity, phosphorylative mechanism (GO:0008553)	2
GO_Molecular_Function_2018	double-stranded RNA binding (GO:0003725)	2
GO_Molecular_Function_2018	O-methyltransferase activity (GO:0008171)	2
GO_Molecular_Function_2018	sulfate transmembrane transporter activity (GO:0015116)	2
GO_Molecular_Function_2018	protein kinase A catalytic subunit binding (GO:0034236)	2
GO_Molecular_Function_2018	ephrin receptor activity (GO:0005003)	2
GO_Molecular_Function_2018	transmembrane-ephrin receptor activity (GO:0005005)	2
GO_Molecular_Function_2018	carboxylic ester hydrolase activity (GO:0052689)	2
GO_Molecular_Function_2018	G-protein coupled neurotransmitter receptor activity (GO:0099528)	2
GO_Molecular_Function_2018	G-protein coupled acetylcholine receptor activity (GO:0016907)	2
GO_Molecular_Function_2018	SH2 domain binding (GO:0042169)	1
GO_Molecular_Function_2018	adenylate cyclase binding (GO:0008179)	1
GO_Molecular_Function_2018	prostaglandin receptor activity (GO:0004955)	1
GO_Molecular_Function_2018	type II transforming growth factor beta receptor binding (GO:0005114)	1
GO_Molecular_Function_2018	protein phosphatase activator activity (GO:0072542)	1
GO_Molecular_Function_2018	retinoic acid binding (GO:0001972)	1
GO_Molecular_Function_2018	poly-pyrimidine tract binding (GO:0008187)	1
GO_Molecular_Function_2018	retinoid binding (GO:0005501)	1
GO_Molecular_Function_2018	chromo shadow domain binding (GO:0070087)	1
GO_Molecular_Function_2018	phosphatidylinositol phosphate kinase activity (GO:0016307)	1
GO_Molecular_Function_2018	L-amino acid transmembrane transporter activity (GO:0015179)	1
GO_Molecular_Function_2018	dipeptidyl-peptidase activity (GO:0008239)	1
GO_Molecular_Function_2018	activin-activated receptor activity (GO:0017002)	1
GO_Molecular_Function_2018	antiporter activity (GO:0015297)	1
GO_Molecular_Function_2018	actinin binding (GO:0042805)	1
GO_Molecular_Function_2018	growth factor activity (GO:0008083)	1
GO_Molecular_Function_2018	GABA-A receptor activity (GO:0004890)	1
GO_Molecular_Function_2018	GABA receptor activity (GO:0016917)	1
GO_Molecular_Function_2018	Lys63-specific deubiquitinase activity (GO:0061578)	1
GO_Molecular_Function_2018	G-protein coupled photoreceptor activity (GO:0008020)	1
GO_Molecular_Function_2018	lysophosphatidic acid acyltransferase activity (GO:0042171)	1
GO_Molecular_Function_2018	ATPase coupled ion transmembrane transporter activity (GO:0042625)	1
GO_Molecular_Function_2018	Lys48-specific deubiquitinase activity (GO:1990380)	1
GO_Molecular_Function_2018	benzodiazepine receptor activity (GO:0008503)	1
GO_Molecular_Function_2018	protein methyltransferase activity (GO:0008276)	1
GO_Molecular_Function_2018	pre-mRNA 3'-splice site binding (GO:0030628)	1
GO_Molecular_Function_2018	GDP-dissociation inhibitor activity (GO:0005092)	1
GO_Molecular_Function_2018	endoribonuclease activity, producing 5'-phosphomonoesters (GO:0016891)	1
GO_Molecular_Function_2018	thiol-dependent ubiquitinyl hydrolase activity (GO:0036459)	1
GO_Molecular_Function_2018	calcium:cation antiporter activity (GO:0015368)	1
GO_Molecular_Function_2018	superoxide-generating NADPH oxidase activity (GO:0016175)	1
GO_Molecular_Function_2018	ribosomal protein S6 kinase activity (GO:0004711)	1
GO_Molecular_Function_2018	extracellular ligand-gated ion channel activity (GO:0005230)	1
GO_Molecular_Function_2018	glucocorticoid receptor binding (GO:0035259)	1
GO_Molecular_Function_2018	O-acetyltransferase activity (GO:0016413)	1
GO_Molecular_Function_2018	histone methyltransferase activity (GO:0042054)	1
GO_Molecular_Function_2018	transcriptional repressor activity, RNA polymerase II activating transcription factor binding (GO:0098811)	1
GO_Molecular_Function_2018	histone kinase activity (GO:0035173)	1
GO_Molecular_Function_2018	peptide N-acetyltransferase activity (GO:0034212)	1
GO_Molecular_Function_2018	MAP kinase phosphatase activity (GO:0033549)	1
GO_Molecular_Function_2018	outward rectifier potassium channel activity (GO:0015271)	1
GO_Molecular_Function_2018	acyl-CoA oxidase activity (GO:0003997)	1
GO_Molecular_Function_2018	ADP binding (GO:0043531)	1
GO_Molecular_Function_2018	insulin-like growth factor I binding (GO:0031994)	1
GO_Molecular_Function_2018	MHC class I protein binding (GO:0042288)	1
GO_Molecular_Function_2018	nucleoside-triphosphatase activity (GO:0017111)	1
GO_Molecular_Function_2018	U6 snRNA binding (GO:0017070)	1
GO_Molecular_Function_2018	alpha-sialidase activity (GO:0016997)	1
GO_Molecular_Function_2018	exo-alpha-sialidase activity (GO:0004308)	1
GO_Molecular_Function_2018	retinoid X receptor binding (GO:0046965)	1
GO_Molecular_Function_2018	complement component C1q binding (GO:0001849)	1
GO_Molecular_Function_2018	RNA polymerase II transcription corepressor activity (GO:0001106)	1
GO_Molecular_Function_2018	MHC protein binding (GO:0042287)	1
GO_Molecular_Function_2018	polyubiquitin modification-dependent protein binding (GO:0031593)	1
GO_Molecular_Function_2018	C4-dicarboxylate transmembrane transporter activity (GO:0015556)	1
GO_Molecular_Function_2018	single-stranded DNA binding (GO:0003697)	1
GO_Molecular_Function_2018	ubiquitin-like protein-specific protease activity (GO:0019783)	1
GO_Molecular_Function_2018	protein disulfide oxidoreductase activity (GO:0015035)	1
GO_Molecular_Function_2018	mannose binding (GO:0005537)	1
GO_Molecular_Function_2018	nucleoside kinase activity (GO:0019206)	1
GO_Molecular_Function_2018	calcium-dependent protein serine/threonine phosphatase activity (GO:0004723)	1
GO_Molecular_Function_2018	tRNA methyltransferase activity (GO:0008175)	1
GO_Molecular_Function_2018	sequence-specific mRNA binding (GO:1990825)	1
GO_Molecular_Function_2018	oxidoreductase activity, acting on paired donors, with incorporation or reduction of molecular oxygen, 2-oxoglutarate as one donor, and incorporation of one atom each of oxygen into both donors (GO:0016706)	1
GO_Molecular_Function_2018	muscle alpha-actinin binding (GO:0051371)	1
GO_Molecular_Function_2018	neuropilin binding (GO:0038191)	1
GO_Molecular_Function_2018	3',5'-cyclic-nucleotide phosphodiesterase activity (GO:0004114)	1
GO_Molecular_Function_2018	nucleoside-triphosphate diphosphatase activity (GO:0047429)	1
GO_Molecular_Function_2018	leukotriene receptor activity (GO:0004974)	1
GO_Molecular_Function_2018	cysteinyl leukotriene receptor activity (GO:0001631)	1
GO_Molecular_Function_2018	RNA polymerase I regulatory region sequence-specific DNA binding (GO:0001163)	1
GO_Molecular_Function_2018	RNA polymerase I CORE element sequence-specific DNA binding (GO:0001164)	1
GO_Molecular_Function_2018	histone acetyltransferase activity (GO:0004402)	1
GO_Molecular_Function_2018	NAADP-sensitive calcium-release channel activity (GO:0072345)	1
GO_Molecular_Function_2018	GTP-Rho binding (GO:0017049)	1
GO_Molecular_Function_2018	eukaryotic initiation factor 4E binding (GO:0008190)	1
GO_Molecular_Function_2018	AT DNA binding (GO:0003680)	1
GO_Molecular_Function_2018	steroid hormone receptor binding (GO:0035258)	1
GO_Molecular_Function_2018	fibroblast growth factor binding (GO:0017134)	1
GO_Molecular_Function_2018	NAD(P)H oxidase activity (GO:0016174)	1
GO_Molecular_Function_2018	miRNA binding (GO:0035198)	1
GO_Molecular_Function_2018	phosphate ion transmembrane transporter activity (GO:0015114)	1
GO_Molecular_Function_2018	gap junction channel activity (GO:0005243)	1
GO_Molecular_Function_2018	voltage-gated anion channel activity (GO:0008308)	1
GO_Molecular_Function_2018	enhancer sequence-specific DNA binding (GO:0001158)	1
GO_Molecular_Function_2018	translation initiation factor activity (GO:0003743)	1
GO_Molecular_Function_2018	potassium channel activity (GO:0005267)	1
GO_Molecular_Function_2018	sodium channel activity (GO:0005272)	1
GO_Molecular_Function_2018	L-ornithine transmembrane transporter activity (GO:0000064)	1
GO_Molecular_Function_2018	poly(A)-specific ribonuclease activity (GO:0004535)	1
GO_Molecular_Function_2018	ligand-dependent nuclear receptor binding (GO:0016922)	1
GO_Molecular_Function_2018	translation elongation factor activity (GO:0003746)	1
GO_Molecular_Function_2018	peroxisome proliferator activated receptor binding (GO:0042975)	1
GO_Molecular_Function_2018	lipase inhibitor activity (GO:0055102)	1
GO_Molecular_Function_2018	magnesium ion binding (GO:0000287)	1
GO_Molecular_Function_2018	cation-transporting ATPase activity (GO:0019829)	1
GO_Molecular_Function_2018	CXCR chemokine receptor binding (GO:0045236)	1
GO_Molecular_Function_2018	acetylcholine receptor regulator activity (GO:0030548)	1
GO_Molecular_Function_2018	BMP receptor activity (GO:0098821)	1
GO_Molecular_Function_2018	monocarboxylic acid binding (GO:0033293)	1
GO_Molecular_Function_2018	helicase activity (GO:0004386)	1
GO_Molecular_Function_2018	transforming growth factor beta receptor binding (GO:0005160)	1
GO_Molecular_Function_2018	Ran GTPase binding (GO:0008536)	1
GO_Molecular_Function_2018	phospholipid scramblase activity (GO:0017128)	1
GO_Molecular_Function_2018	retinol binding (GO:0019841)	1
GO_Molecular_Function_2018	protein kinase C binding (GO:0005080)	1
GO_Molecular_Function_2018	NADH dehydrogenase (ubiquinone) activity (GO:0008137)	1
GO_Molecular_Function_2018	NADH dehydrogenase (quinone) activity (GO:0050136)	1
GO_Molecular_Function_2018	myosin heavy chain binding (GO:0032036)	1
GO_Molecular_Function_2018	transcription factor activity, RNA polymerase II core promoter sequence-specific (GO:0000983)	1
GO_Molecular_Function_2018	DNA binding, bending (GO:0008301)	1
GO_Molecular_Function_2018	alditol:NADP+ 1-oxidoreductase activity (GO:0004032)	1
GO_Molecular_Function_2018	intramolecular transferase activity, phosphotransferases (GO:0016868)	1
GO_Molecular_Function_2018	nucleotide kinase activity (GO:0019201)	1
GO_Molecular_Function_2018	7SK snRNA binding (GO:0097322)	1
GO_Molecular_Function_2018	histone methyltransferase binding (GO:1990226)	1
GO_Molecular_Function_2018	ketosteroid monooxygenase activity (GO:0047086)	1
GO_Molecular_Function_2018	core promoter proximal region DNA binding (GO:0001159)	1
GO_Molecular_Function_2018	DNA-directed DNA polymerase activity (GO:0003887)	1
GO_Molecular_Function_2018	transcription coactivator binding (GO:0001223)	1
GO_Molecular_Function_2018	transcription cofactor binding (GO:0001221)	1
GO_Molecular_Function_2018	calcium-activated potassium channel activity (GO:0015269)	1
GO_Molecular_Function_2018	dopamine neurotransmitter receptor activity (GO:0004952)	1
GO_Molecular_Function_2018	phosphatidylinositol-4-phosphate binding (GO:0070273)	1
GO_Molecular_Function_2018	non-membrane spanning protein tyrosine kinase activity (GO:0004715)	1
GO_Molecular_Function_2018	G-quadruplex DNA binding (GO:0051880)	1
GO_Molecular_Function_2018	U1 snRNA binding (GO:0030619)	1
GO_Molecular_Function_2018	endopeptidase regulator activity (GO:0061135)	1
GO_Molecular_Function_2018	protein-lysine 6-oxidase activity (GO:0004720)	1
GO_Molecular_Function_2018	steroid hydroxylase activity (GO:0008395)	1
GO_Molecular_Function_2018	dopamine binding (GO:0035240)	1
GO_Molecular_Function_2018	voltage-gated potassium channel activity (GO:0005249)	1
GO_Molecular_Function_2018	aryl hydrocarbon receptor binding (GO:0017162)	1
GO_Molecular_Function_2018	ammonium ion binding (GO:0070405)	1
GO_Molecular_Function_2018	histone demethylase activity (H3-K9 specific) (GO:0032454)	1
GO_Molecular_Function_2018	GPI anchor binding (GO:0034235)	1
GO_Molecular_Function_2018	protein binding involved in cell-matrix adhesion (GO:0098634)	1
GO_Molecular_Function_2018	Rac guanyl-nucleotide exchange factor activity (GO:0030676)	1
GO_Molecular_Function_2018	ribosomal large subunit binding (GO:0043023)	1
GO_Molecular_Function_2018	2 iron, 2 sulfur cluster binding (GO:0051537)	1
GO_Molecular_Function_2018	protein-DNA loading ATPase activity (GO:0033170)	1
GO_Molecular_Function_2018	DNA clamp loader activity (GO:0003689)	1
GO_Molecular_Function_2018	phosphatidylinositol-3,5-bisphosphate binding (GO:0080025)	1
GO_Molecular_Function_2018	hydro-lyase activity (GO:0016836)	1
GO_Molecular_Function_2018	Arp2/3 complex binding (GO:0071933)	1
GO_Molecular_Function_2018	voltage-gated potassium channel activity involved in ventricular cardiac muscle cell action potential repolarization (GO:1902282)	1
GO_Molecular_Function_2018	ribonuclease P activity (GO:0004526)	1
GO_Molecular_Function_2018	DNA N-glycosylase activity (GO:0019104)	1
GO_Molecular_Function_2018	NADPH binding (GO:0070402)	1
GO_Molecular_Function_2018	ubiquitin conjugating enzyme binding (GO:0031624)	1
GO_Molecular_Function_2018	ATP-dependent microtubule motor activity, minus-end-directed (GO:0008569)	1
GO_Molecular_Function_2018	purinergic nucleotide receptor activity (GO:0001614)	1
GO_Molecular_Function_2018	cytochrome-b5 reductase activity, acting on NAD(P)H (GO:0004128)	1
GO_Molecular_Function_2018	single-stranded RNA binding (GO:0003727)	1
GO_Molecular_Function_2018	ion transmembrane transporter activity (GO:0015075)	1
GO_Molecular_Function_2018	Rac GTPase binding (GO:0048365)	1
GO_Molecular_Function_2018	chloride transmembrane transporter activity (GO:0015108)	1
GO_Molecular_Function_2018	oxalate transmembrane transporter activity (GO:0019531)	1
GO_Molecular_Function_2018	chloride channel activity (GO:0005254)	1
GO_Molecular_Function_2018	RNA polymerase II activity (GO:0001055)	1
GO_Molecular_Function_2018	anion channel activity (GO:0005253)	1
GO_Molecular_Function_2018	inhibitory extracellular ligand-gated ion channel activity (GO:0005237)	1
GO_Molecular_Function_2018	ligand-gated anion channel activity (GO:0099095)	1
GO_Molecular_Function_2018	voltage-gated sodium channel activity (GO:0005248)	1
GO_Molecular_Function_2018	glucosyltransferase activity (GO:0046527)	1
GO_Molecular_Function_2018	cysteine-type endopeptidase activity involved in execution phase of apoptosis (GO:0097200)	1
GO_Molecular_Function_2018	ubiquitin-protein transferase activity (GO:0004842)	1
GO_Molecular_Function_2018	protein serine/threonine kinase inhibitor activity (GO:0030291)	1
GO_Molecular_Function_2018	myosin binding (GO:0017022)	1
GO_Molecular_Function_2018	mRNA 5'-UTR binding (GO:0048027)	1
GO_Molecular_Function_2018	glycine binding (GO:0016594)	1
GO_Molecular_Function_2018	potassium:proton antiporter activity (GO:0015386)	1
GO_Molecular_Function_2018	phospholipid-translocating ATPase activity (GO:0004012)	1
GO_Molecular_Function_2018	glucose transmembrane transporter activity (GO:0005355)	1
GO_Molecular_Function_2018	macromolecule transmembrane transporter activity (GO:0022884)	1
GO_Molecular_Function_2018	phosphotransferase activity, phosphate group as acceptor (GO:0016776)	1
GO_Molecular_Function_2018	aldo-keto reductase (NADP) activity (GO:0004033)	1
GO_Molecular_Function_2018	hydrolase activity, acting on carbon-nitrogen (but not peptide) bonds, in linear amidines (GO:0016813)	1
GO_Cellular_Component_2018	nuclear transcription factor complex (GO:0044798)	53
GO_Cellular_Component_2018	mitochondrion (GO:0005739)	48
GO_Cellular_Component_2018	intermediate filament (GO:0005882)	46
GO_Cellular_Component_2018	keratin filament (GO:0045095)	44
GO_Cellular_Component_2018	catenin complex (GO:0016342)	44
GO_Cellular_Component_2018	AIM2 inflammasome complex (GO:0097169)	43
GO_Cellular_Component_2018	NLRP3 inflammasome complex (GO:0072559)	43
GO_Cellular_Component_2018	IPAF inflammasome complex (GO:0072557)	40
GO_Cellular_Component_2018	telomerase holoenzyme complex (GO:0005697)	40
GO_Cellular_Component_2018	P granule (GO:0043186)	39
GO_Cellular_Component_2018	azurophil granule membrane (GO:0035577)	32
GO_Cellular_Component_2018	ficolin-1-rich granule membrane (GO:0101003)	31
GO_Cellular_Component_2018	nuclear body (GO:0016604)	31
GO_Cellular_Component_2018	intermediate filament cytoskeleton (GO:0045111)	30
GO_Cellular_Component_2018	azurophil granule (GO:0042582)	30
GO_Cellular_Component_2018	polymeric cytoskeletal fiber (GO:0099513)	29
GO_Cellular_Component_2018	contractile fiber (GO:0043292)	29
GO_Cellular_Component_2018	myofibril (GO:0030016)	28
GO_Cellular_Component_2018	nucleoplasm part (GO:0044451)	28
GO_Cellular_Component_2018	secondary lysosome (GO:0005767)	28
GO_Cellular_Component_2018	cytoskeleton (GO:0005856)	27
GO_Cellular_Component_2018	cytoplasmic ribonucleoprotein granule (GO:0036464)	27
GO_Cellular_Component_2018	U7 snRNP (GO:0005683)	26
GO_Cellular_Component_2018	cation channel complex (GO:0034703)	25
GO_Cellular_Component_2018	perinuclear region of cytoplasm (GO:0048471)	25
GO_Cellular_Component_2018	Cul4A-RING E3 ubiquitin ligase complex (GO:0031464)	25
GO_Cellular_Component_2018	spindle midzone (GO:0051233)	24
GO_Cellular_Component_2018	Golgi stack (GO:0005795)	24
GO_Cellular_Component_2018	mitochondrial outer membrane (GO:0005741)	24
GO_Cellular_Component_2018	striated muscle thin filament (GO:0005865)	23
GO_Cellular_Component_2018	nuclear speck (GO:0016607)	23
GO_Cellular_Component_2018	anchored component of external side of plasma membrane (GO:0031362)	22
GO_Cellular_Component_2018	actin cytoskeleton (GO:0015629)	22
GO_Cellular_Component_2018	RNA polymerase II transcription factor complex (GO:0090575)	22
GO_Cellular_Component_2018	condensed chromosome kinetochore (GO:0000777)	21
GO_Cellular_Component_2018	pi-body (GO:0071546)	21
GO_Cellular_Component_2018	platelet dense granule (GO:0042827)	20
GO_Cellular_Component_2018	spindle microtubule (GO:0005876)	20
GO_Cellular_Component_2018	autophagosome membrane (GO:0000421)	20
GO_Cellular_Component_2018	exocytic vesicle (GO:0070382)	20
GO_Cellular_Component_2018	INO80-type complex (GO:0097346)	20
GO_Cellular_Component_2018	Golgi subcompartment (GO:0098791)	20
GO_Cellular_Component_2018	nuclear chromosome part (GO:0044454)	20
GO_Cellular_Component_2018	Rad51B-Rad51C-Rad51D-XRCC2 complex (GO:0033063)	19
GO_Cellular_Component_2018	Set1C/COMPASS complex (GO:0048188)	19
GO_Cellular_Component_2018	centriolar satellite (GO:0034451)	19
GO_Cellular_Component_2018	AMPA glutamate receptor complex (GO:0032281)	19
GO_Cellular_Component_2018	signal recognition particle (GO:0048500)	19
GO_Cellular_Component_2018	vacuole (GO:0005773)	19
GO_Cellular_Component_2018	pseudopodium (GO:0031143)	18
GO_Cellular_Component_2018	Golgi cisterna (GO:0031985)	18
GO_Cellular_Component_2018	cis-Golgi network (GO:0005801)	18
GO_Cellular_Component_2018	Golgi cisterna membrane (GO:0032580)	18
GO_Cellular_Component_2018	Golgi cis cisterna (GO:0000137)	18
GO_Cellular_Component_2018	intrinsic component of external side of plasma membrane (GO:0031233)	18
GO_Cellular_Component_2018	ionotropic glutamate receptor complex (GO:0008328)	17
GO_Cellular_Component_2018	commitment complex (GO:0000243)	17
GO_Cellular_Component_2018	endoplasmic reticulum-Golgi intermediate compartment membrane (GO:0033116)	17
GO_Cellular_Component_2018	integral component of plasma membrane (GO:0005887)	17
GO_Cellular_Component_2018	sarcoplasm (GO:0016528)	17
GO_Cellular_Component_2018	early endosome (GO:0005769)	17
GO_Cellular_Component_2018	methylosome (GO:0034709)	16
GO_Cellular_Component_2018	L-type voltage-gated calcium channel complex (GO:1990454)	15
GO_Cellular_Component_2018	PRC1 complex (GO:0035102)	15
GO_Cellular_Component_2018	pre-autophagosomal structure (GO:0000407)	15
GO_Cellular_Component_2018	nuclear ubiquitin ligase complex (GO:0000152)	15
GO_Cellular_Component_2018	microtubule organizing center part (GO:0044450)	15
GO_Cellular_Component_2018	mitochondrial matrix (GO:0005759)	15
GO_Cellular_Component_2018	MLL1/2 complex (GO:0044665)	14
GO_Cellular_Component_2018	MLL1 complex (GO:0071339)	14
GO_Cellular_Component_2018	platelet dense granule lumen (GO:0031089)	14
GO_Cellular_Component_2018	secretory granule lumen (GO:0034774)	14
GO_Cellular_Component_2018	anchored component of plasma membrane (GO:0046658)	14
GO_Cellular_Component_2018	tertiary granule (GO:0070820)	13
GO_Cellular_Component_2018	intrinsic component of mitochondrial inner membrane (GO:0031304)	13
GO_Cellular_Component_2018	ficolin-1-rich granule (GO:0101002)	13
GO_Cellular_Component_2018	gamma-secretase complex (GO:0070765)	13
GO_Cellular_Component_2018	coated vesicle (GO:0030135)	13
GO_Cellular_Component_2018	centrosome (GO:0005813)	12
GO_Cellular_Component_2018	beta-catenin-TCF complex (GO:1990907)	12
GO_Cellular_Component_2018	neurotransmitter receptor complex (GO:0098878)	12
GO_Cellular_Component_2018	manchette (GO:0002177)	12
GO_Cellular_Component_2018	spindle (GO:0005819)	11
GO_Cellular_Component_2018	microtubule cytoskeleton (GO:0015630)	11
GO_Cellular_Component_2018	ribonucleoprotein granule (GO:0035770)	11
GO_Cellular_Component_2018	germ plasm (GO:0060293)	11
GO_Cellular_Component_2018	pericentric heterochromatin (GO:0005721)	11
GO_Cellular_Component_2018	integral component of nuclear inner membrane (GO:0005639)	10
GO_Cellular_Component_2018	sarcoplasmic reticulum (GO:0016529)	10
GO_Cellular_Component_2018	microtubule minus-end (GO:0036449)	9
GO_Cellular_Component_2018	node of Ranvier (GO:0033268)	9
GO_Cellular_Component_2018	U2-type prespliceosome (GO:0071004)	9
GO_Cellular_Component_2018	spindle pole body (GO:0005816)	9
GO_Cellular_Component_2018	prespliceosome (GO:0071010)	9
GO_Cellular_Component_2018	mitochondrial respiratory chain complex IV (GO:0005751)	9
GO_Cellular_Component_2018	actomyosin (GO:0042641)	8
GO_Cellular_Component_2018	intrinsic component of the cytoplasmic side of the plasma membrane (GO:0031235)	8
GO_Cellular_Component_2018	intercalated disc (GO:0014704)	8
GO_Cellular_Component_2018	DNA-directed RNA polymerase III complex (GO:0005666)	8
GO_Cellular_Component_2018	azurophil granule lumen (GO:0035578)	8
GO_Cellular_Component_2018	nuclear chromatin (GO:0000790)	8
GO_Cellular_Component_2018	mitotic spindle pole (GO:0097431)	7
GO_Cellular_Component_2018	nuclear exosome (RNase complex) (GO:0000176)	7
GO_Cellular_Component_2018	kinesin complex (GO:0005871)	7
GO_Cellular_Component_2018	vacuolar lumen (GO:0005775)	7
GO_Cellular_Component_2018	cytoplasmic vesicle membrane (GO:0030659)	7
GO_Cellular_Component_2018	DNA-directed RNA polymerase complex (GO:0000428)	7
GO_Cellular_Component_2018	AP-3 adaptor complex (GO:0030123)	7
GO_Cellular_Component_2018	U12-type spliceosomal complex (GO:0005689)	7
GO_Cellular_Component_2018	BAF-type complex (GO:0090544)	6
GO_Cellular_Component_2018	lytic vacuole (GO:0000323)	6
GO_Cellular_Component_2018	micro-ribonucleoprotein complex (GO:0035068)	6
GO_Cellular_Component_2018	cyclin-dependent protein kinase activating kinase holoenzyme complex (GO:0019907)	6
GO_Cellular_Component_2018	histone methyltransferase complex (GO:0035097)	6
GO_Cellular_Component_2018	CD40 receptor complex (GO:0035631)	6
GO_Cellular_Component_2018	brush border membrane (GO:0031526)	6
GO_Cellular_Component_2018	platelet alpha granule lumen (GO:0031093)	5
GO_Cellular_Component_2018	platelet alpha granule (GO:0031091)	5
GO_Cellular_Component_2018	integral component of mitochondrial membrane (GO:0032592)	5
GO_Cellular_Component_2018	Ino80 complex (GO:0031011)	5
GO_Cellular_Component_2018	nuclear nucleosome (GO:0000788)	5
GO_Cellular_Component_2018	microtubule (GO:0005874)	5
GO_Cellular_Component_2018	cytoplasmic vesicle lumen (GO:0060205)	5
GO_Cellular_Component_2018	autophagosome (GO:0005776)	5
GO_Cellular_Component_2018	specific granule membrane (GO:0035579)	5
GO_Cellular_Component_2018	caveola (GO:0005901)	5
GO_Cellular_Component_2018	mitotic spindle midzone (GO:1990023)	4
GO_Cellular_Component_2018	membrane raft (GO:0045121)	4
GO_Cellular_Component_2018	axon initial segment (GO:0043194)	4
GO_Cellular_Component_2018	STAGA complex (GO:0030914)	4
GO_Cellular_Component_2018	early phagosome (GO:0032009)	4
GO_Cellular_Component_2018	main axon (GO:0044304)	4
GO_Cellular_Component_2018	Golgi lumen (GO:0005796)	4
GO_Cellular_Component_2018	condensed chromosome (GO:0000793)	4
GO_Cellular_Component_2018	smooth endoplasmic reticulum (GO:0005790)	4
GO_Cellular_Component_2018	actin filament (GO:0005884)	4
GO_Cellular_Component_2018	condensed chromosome, centromeric region (GO:0000779)	4
GO_Cellular_Component_2018	ficolin-1-rich granule lumen (GO:1904813)	4
GO_Cellular_Component_2018	T cell receptor complex (GO:0042101)	4
GO_Cellular_Component_2018	nuclear chromosome (GO:0000228)	4
GO_Cellular_Component_2018	lysosomal membrane (GO:0005765)	4
GO_Cellular_Component_2018	autolysosome (GO:0044754)	4
GO_Cellular_Component_2018	focal adhesion (GO:0005925)	4
GO_Cellular_Component_2018	holo TFIIH complex (GO:0005675)	4
GO_Cellular_Component_2018	Golgi-associated vesicle (GO:0005798)	4
GO_Cellular_Component_2018	U4 snRNP (GO:0005687)	3
GO_Cellular_Component_2018	polysome (GO:0005844)	3
GO_Cellular_Component_2018	nuclear inclusion body (GO:0042405)	3
GO_Cellular_Component_2018	nuclear DNA-directed RNA polymerase complex (GO:0055029)	3
GO_Cellular_Component_2018	lipid droplet (GO:0005811)	3
GO_Cellular_Component_2018	centriole (GO:0005814)	3
GO_Cellular_Component_2018	microtubule organizing center (GO:0005815)	3
GO_Cellular_Component_2018	MHC protein complex (GO:0042611)	3
GO_Cellular_Component_2018	MHC class II protein complex (GO:0042613)	3
GO_Cellular_Component_2018	ER to Golgi transport vesicle membrane (GO:0012507)	3
GO_Cellular_Component_2018	spherical high-density lipoprotein particle (GO:0034366)	3
GO_Cellular_Component_2018	early endosome membrane (GO:0031901)	3
GO_Cellular_Component_2018	Golgi membrane (GO:0000139)	3
GO_Cellular_Component_2018	lysosomal lumen (GO:0043202)	3
GO_Cellular_Component_2018	Cul4-RING E3 ubiquitin ligase complex (GO:0080008)	3
GO_Cellular_Component_2018	flotillin complex (GO:0016600)	3
GO_Cellular_Component_2018	clathrin-sculpted gamma-aminobutyric acid transport vesicle membrane (GO:0061202)	3
GO_Cellular_Component_2018	clathrin-sculpted gamma-aminobutyric acid transport vesicle (GO:0061200)	3
GO_Cellular_Component_2018	lytic vacuole membrane (GO:0098852)	3
GO_Cellular_Component_2018	nuclear replisome (GO:0043601)	3
GO_Cellular_Component_2018	nucleolus (GO:0005730)	3
GO_Cellular_Component_2018	nuclear cyclin-dependent protein kinase holoenzyme complex (GO:0019908)	3
GO_Cellular_Component_2018	endoplasmic reticulum-Golgi intermediate compartment (GO:0005793)	3
GO_Cellular_Component_2018	nuclear inner membrane (GO:0005637)	3
GO_Cellular_Component_2018	microtubule end (GO:1990752)	2
GO_Cellular_Component_2018	U1 snRNP (GO:0005685)	2
GO_Cellular_Component_2018	spectrin-associated cytoskeleton (GO:0014731)	2
GO_Cellular_Component_2018	SWI/SNF complex (GO:0016514)	2
GO_Cellular_Component_2018	spindle pole centrosome (GO:0031616)	2
GO_Cellular_Component_2018	COPI-coated vesicle (GO:0030137)	2
GO_Cellular_Component_2018	filopodium (GO:0030175)	2
GO_Cellular_Component_2018	cytoplasmic exosome (RNase complex) (GO:0000177)	2
GO_Cellular_Component_2018	signal recognition particle, endoplasmic reticulum targeting (GO:0005786)	2
GO_Cellular_Component_2018	primary lysosome (GO:0005766)	2
GO_Cellular_Component_2018	integral component of lumenal side of endoplasmic reticulum membrane (GO:0071556)	2
GO_Cellular_Component_2018	integral component of endoplasmic reticulum membrane (GO:0030176)	2
GO_Cellular_Component_2018	mitochondrial small ribosomal subunit (GO:0005763)	2
GO_Cellular_Component_2018	trans-Golgi network (GO:0005802)	2
GO_Cellular_Component_2018	condensed nuclear chromosome kinetochore (GO:0000778)	2
GO_Cellular_Component_2018	COPII vesicle coat (GO:0030127)	2
GO_Cellular_Component_2018	very-low-density lipoprotein particle (GO:0034361)	2
GO_Cellular_Component_2018	specific granule (GO:0042581)	2
GO_Cellular_Component_2018	clathrin-coated vesicle (GO:0030136)	2
GO_Cellular_Component_2018	chromatin (GO:0000785)	2
GO_Cellular_Component_2018	endocytic vesicle lumen (GO:0071682)	2
GO_Cellular_Component_2018	preribosome, small subunit precursor (GO:0030688)	2
GO_Cellular_Component_2018	Swr1 complex (GO:0000812)	2
GO_Cellular_Component_2018	chromosome (GO:0005694)	2
GO_Cellular_Component_2018	cell cortex part (GO:0044448)	2
GO_Cellular_Component_2018	fibrillar center (GO:0001650)	2
GO_Cellular_Component_2018	endocytic vesicle (GO:0030139)	2
GO_Cellular_Component_2018	SCF ubiquitin ligase complex (GO:0019005)	2
GO_Cellular_Component_2018	bicellular tight junction (GO:0005923)	2
GO_Cellular_Component_2018	cytoplasmic dynein complex (GO:0005868)	2
GO_Cellular_Component_2018	integral component of mitochondrial inner membrane (GO:0031305)	2
GO_Cellular_Component_2018	actin cortical patch (GO:0030479)	2
GO_Cellular_Component_2018	endocytic patch (GO:0061645)	2
GO_Cellular_Component_2018	nuclear telomere cap complex (GO:0000783)	2
GO_Cellular_Component_2018	septin cytoskeleton (GO:0032156)	2
GO_Cellular_Component_2018	septin ring (GO:0005940)	2
GO_Cellular_Component_2018	septin filament array (GO:0032160)	2
GO_Cellular_Component_2018	precatalytic spliceosome (GO:0071011)	1
GO_Cellular_Component_2018	npBAF complex (GO:0071564)	1
GO_Cellular_Component_2018	mRNA cleavage and polyadenylation specificity factor complex (GO:0005847)	1
GO_Cellular_Component_2018	endoribonuclease complex (GO:1902555)	1
GO_Cellular_Component_2018	mitochondrial inner membrane presequence translocase complex (GO:0005744)	1
GO_Cellular_Component_2018	HAUS complex (GO:0070652)	1
GO_Cellular_Component_2018	GABA-A receptor complex (GO:1902711)	1
GO_Cellular_Component_2018	ATP-binding cassette (ABC) transporter complex (GO:0043190)	1
GO_Cellular_Component_2018	messenger ribonucleoprotein complex (GO:1990124)	1
GO_Cellular_Component_2018	axonal growth cone (GO:0044295)	1
GO_Cellular_Component_2018	contractile actin filament bundle (GO:0097517)	1
GO_Cellular_Component_2018	stress fiber (GO:0001725)	1
GO_Cellular_Component_2018	endoplasmic reticulum quality control compartment (GO:0044322)	1
GO_Cellular_Component_2018	MLL3/4 complex (GO:0044666)	1
GO_Cellular_Component_2018	insulin-responsive compartment (GO:0032593)	1
GO_Cellular_Component_2018	condensed nuclear chromosome, centromeric region (GO:0000780)	1
GO_Cellular_Component_2018	platelet dense granule membrane (GO:0031088)	1
GO_Cellular_Component_2018	unconventional myosin complex (GO:0016461)	1
GO_Cellular_Component_2018	COPII-coated ER to Golgi transport vesicle (GO:0030134)	1
GO_Cellular_Component_2018	recycling endosome (GO:0055037)	1
GO_Cellular_Component_2018	recycling endosome membrane (GO:0055038)	1
GO_Cellular_Component_2018	DNA-directed RNA polymerase II, holoenzyme (GO:0016591)	1
GO_Cellular_Component_2018	U4/U6 x U5 tri-snRNP complex (GO:0046540)	1
GO_Cellular_Component_2018	small ribosomal subunit (GO:0015935)	1
GO_Cellular_Component_2018	clathrin-coated endocytic vesicle membrane (GO:0030669)	1
GO_Cellular_Component_2018	clathrin-coated endocytic vesicle (GO:0045334)	1
GO_Cellular_Component_2018	trans-Golgi network transport vesicle (GO:0030140)	1
GO_Cellular_Component_2018	H3 histone acetyltransferase complex (GO:0070775)	1
GO_Cellular_Component_2018	MOZ/MORF histone acetyltransferase complex (GO:0070776)	1
GO_Cellular_Component_2018	Cdc73/Paf1 complex (GO:0016593)	1
GO_Cellular_Component_2018	specific granule lumen (GO:0035580)	1
GO_Cellular_Component_2018	mitochondrial outer membrane translocase complex (GO:0005742)	1
GO_Cellular_Component_2018	calcium channel complex (GO:0034704)	1
GO_Cellular_Component_2018	replication fork (GO:0005657)	1
GO_Cellular_Component_2018	nuclear proteasome complex (GO:0031595)	1
GO_Cellular_Component_2018	sodium channel complex (GO:0034706)	1
GO_Cellular_Component_2018	COPI vesicle coat (GO:0030126)	1
GO_Cellular_Component_2018	small nuclear ribonucleoprotein complex (GO:0030532)	1
GO_Cellular_Component_2018	peroxisomal membrane (GO:0005778)	1
GO_Cellular_Component_2018	multivesicular body lumen (GO:0097486)	1
GO_Cellular_Component_2018	mitochondrial large ribosomal subunit (GO:0005762)	1
GO_Cellular_Component_2018	chromosome, telomeric region (GO:0000781)	1
GO_Cellular_Component_2018	endosome lumen (GO:0031904)	1
GO_Cellular_Component_2018	vesicle coat (GO:0030120)	1
GO_Cellular_Component_2018	U2-type catalytic step 2 spliceosome (GO:0071007)	1
GO_Cellular_Component_2018	Cul3-RING ubiquitin ligase complex (GO:0031463)	1
GO_Cellular_Component_2018	late endosome lumen (GO:0031906)	1
GO_Cellular_Component_2018	RNA polymerase III transcription factor complex (GO:0090576)	1
GO_Cellular_Component_2018	CHD-type complex (GO:0090545)	1
GO_Cellular_Component_2018	NuRD complex (GO:0016581)	1
GO_Cellular_Component_2018	membrane attack complex (GO:0005579)	1
GO_Cellular_Component_2018	lamellar body (GO:0042599)	1
GO_Cellular_Component_2018	P-body (GO:0000932)	1
GO_Cellular_Component_2018	oxoglutarate dehydrogenase complex (GO:0045252)	1
GO_Cellular_Component_2018	nucleolar ribonuclease P complex (GO:0005655)	1
GO_Cellular_Component_2018	nucleolar part (GO:0044452)	1
GO_Cellular_Component_2018	outer dynein arm (GO:0036157)	1
GO_Cellular_Component_2018	transcription factor TFIID complex (GO:0005669)	1
GO_Cellular_Component_2018	mitochondrial envelope (GO:0005740)	1
GO_Cellular_Component_2018	heterochromatin (GO:0000792)	1
GO_Cellular_Component_2018	apical dendrite (GO:0097440)	1
GO_Cellular_Component_2018	death-inducing signaling complex (GO:0031264)	1
GO_Cellular_Component_2018	nuclear heterochromatin (GO:0005720)	1
GO_Cellular_Component_2018	multimeric ribonuclease P complex (GO:0030681)	1
GO_Cellular_Component_2018	filopodium tip (GO:0032433)	1
GO_Cellular_Component_2018	endolysosome (GO:0036019)	1
GO_Cellular_Component_2018	spanning component of membrane (GO:0089717)	1
GO_Cellular_Component_2018	transcriptionally active chromatin (GO:0035327)	1
GO_Cellular_Component_2018	polysomal ribosome (GO:0042788)	1
GO_Cellular_Component_2018	endolysosome membrane (GO:0036020)	1
GO_Cellular_Component_2018	integral component of Golgi membrane (GO:0030173)	1
GO_Cellular_Component_2018	spindle pole (GO:0000922)	1
GO_Cellular_Component_2018	endosomal part (GO:0044440)	1
GO_Cellular_Component_2018	endoplasmic reticulum exit site (GO:0070971)	1
GO_Cellular_Component_2018	phagocytic vesicle membrane (GO:0030670)	1
GO_Cellular_Component_2018	alpha DNA polymerase:primase complex (GO:0005658)	1
GO_Cellular_Component_2018	vacuolar proton-transporting V-type ATPase complex (GO:0016471)	1
GO_Cellular_Component_2018	extrinsic component of endosome membrane (GO:0031313)	1
GO_Cellular_Component_2018	phagocytic vesicle (GO:0045335)	1
GO_Cellular_Component_2018	lysosome (GO:0005764)	1
GO_Cellular_Component_2018	junctional sarcoplasmic reticulum membrane (GO:0014701)	1
GO_Cellular_Component_2018	tertiary granule lumen (GO:1904724)	1
GO_Cellular_Component_2018	lateral element (GO:0000800)	1
GO_Cellular_Component_2018	transcription factor TFTC complex (GO:0033276)	1
GO_Cellular_Component_2018	microvillus membrane (GO:0031528)	1
GO_Cellular_Component_2018	axon (GO:0030424)	1
GO_Cellular_Component_2018	proton-transporting V-type ATPase complex (GO:0033176)	1
GO_Cellular_Component_2018	microvillus (GO:0005902)	1
GO_Cellular_Component_2018	MICOS complex (GO:0061617)	1
GO_Cellular_Component_2018	myosin filament (GO:0032982)	1
GO_Cellular_Component_2018	PML body (GO:0016605)	1
GO_Cellular_Component_2018	juxtaparanode region of axon (GO:0044224)	1
GO_Cellular_Component_2018	endoplasmic reticulum lumen (GO:0005788)	1
GO_Cellular_Component_2018	core mediator complex (GO:0070847)	1
GO_Cellular_Component_2018	nuclear origin of replication recognition complex (GO:0005664)	1
GO_Biological_Process_2018	keratinocyte differentiation (GO:0030216)	66
GO_Biological_Process_2018	peptide cross-linking (GO:0018149)	66
GO_Biological_Process_2018	epidermal cell differentiation (GO:0009913)	66
GO_Biological_Process_2018	skin development (GO:0043588)	66
GO_Biological_Process_2018	extracellular matrix disassembly (GO:0022617)	64
GO_Biological_Process_2018	DNA cytosine deamination (GO:0070383)	59
GO_Biological_Process_2018	regulation of single stranded viral RNA replication via double stranded DNA intermediate (GO:0045091)	59
GO_Biological_Process_2018	negative regulation of single stranded viral RNA replication via double stranded DNA intermediate (GO:0045869)	59
GO_Biological_Process_2018	regulation of alcohol biosynthetic process (GO:1902930)	58
GO_Biological_Process_2018	positive regulation of cytolysis (GO:0045919)	57
GO_Biological_Process_2018	cytidine to uridine editing (GO:0016554)	57
GO_Biological_Process_2018	base conversion or substitution editing (GO:0016553)	57
GO_Biological_Process_2018	epidermis development (GO:0008544)	56
GO_Biological_Process_2018	DNA deamination (GO:0045006)	56
GO_Biological_Process_2018	water transport (GO:0006833)	55
GO_Biological_Process_2018	cellular protein modification process (GO:0006464)	55
GO_Biological_Process_2018	positive regulation of fibroblast proliferation (GO:0048146)	55
GO_Biological_Process_2018	regulation of transposition (GO:0010528)	54
GO_Biological_Process_2018	negative regulation of hydrolase activity (GO:0051346)	53
GO_Biological_Process_2018	positive regulation of immune response (GO:0050778)	53
GO_Biological_Process_2018	Golgi vesicle transport (GO:0048193)	52
GO_Biological_Process_2018	regulation of transforming growth factor beta production (GO:0071634)	51
GO_Biological_Process_2018	regulation of cholesterol metabolic process (GO:0090181)	50
GO_Biological_Process_2018	outer mitochondrial membrane organization (GO:0007008)	49
GO_Biological_Process_2018	sterol biosynthetic process (GO:0016126)	47
GO_Biological_Process_2018	negative regulation of transposition (GO:0010529)	47
GO_Biological_Process_2018	negative regulation of complement activation (GO:0045916)	46
GO_Biological_Process_2018	fluid transport (GO:0042044)	45
GO_Biological_Process_2018	calcium-dependent cell-cell adhesion via plasma membrane cell adhesion molecules (GO:0016339)	45
GO_Biological_Process_2018	negative regulation of protein binding (GO:0032091)	45
GO_Biological_Process_2018	regulation of protein binding (GO:0043393)	44
GO_Biological_Process_2018	vesicle organization (GO:0016050)	44
GO_Biological_Process_2018	regulation of inflammatory response (GO:0050727)	43
GO_Biological_Process_2018	negative regulation of endopeptidase activity (GO:0010951)	43
GO_Biological_Process_2018	cholesterol biosynthetic process (GO:0006695)	43
GO_Biological_Process_2018	myeloid cell activation involved in immune response (GO:0002275)	43
GO_Biological_Process_2018	regulation of B cell proliferation (GO:0030888)	43
GO_Biological_Process_2018	cell-cell junction assembly (GO:0007043)	43
GO_Biological_Process_2018	regulation of cholesterol biosynthetic process (GO:0045540)	43
GO_Biological_Process_2018	cellular response to zinc ion (GO:0071294)	42
GO_Biological_Process_2018	regulation of defense response (GO:0031347)	42
GO_Biological_Process_2018	regulation of cholesterol esterification (GO:0010872)	42
GO_Biological_Process_2018	regulation of AMPA receptor activity (GO:2000311)	42
GO_Biological_Process_2018	nervous system development (GO:0007399)	42
GO_Biological_Process_2018	negative regulation of viral genome replication (GO:0045071)	42
GO_Biological_Process_2018	cellular response to copper ion (GO:0071280)	41
GO_Biological_Process_2018	response to zinc ion (GO:0010043)	41
GO_Biological_Process_2018	response to nitric oxide (GO:0071731)	41
GO_Biological_Process_2018	regulation of immunoglobulin production (GO:0002637)	41
GO_Biological_Process_2018	regulation of serine-type endopeptidase activity (GO:1900003)	41
GO_Biological_Process_2018	keratan sulfate catabolic process (GO:0042340)	41
GO_Biological_Process_2018	neuron projection regeneration (GO:0031102)	41
GO_Biological_Process_2018	response to copper ion (GO:0046688)	40
GO_Biological_Process_2018	cellular zinc ion homeostasis (GO:0006882)	40
GO_Biological_Process_2018	keratan sulfate metabolic process (GO:0042339)	40
GO_Biological_Process_2018	vesicle fusion (GO:0006906)	40
GO_Biological_Process_2018	positive regulation of transforming growth factor beta production (GO:0071636)	39
GO_Biological_Process_2018	synapse assembly (GO:0007416)	39
GO_Biological_Process_2018	organic substance transport (GO:0071702)	39
GO_Biological_Process_2018	neutrophil activation involved in immune response (GO:0002283)	39
GO_Biological_Process_2018	sulfur compound catabolic process (GO:0044273)	39
GO_Biological_Process_2018	cellular response to cadmium ion (GO:0071276)	38
GO_Biological_Process_2018	secondary alcohol biosynthetic process (GO:1902653)	38
GO_Biological_Process_2018	urate transport (GO:0015747)	38
GO_Biological_Process_2018	myeloid dendritic cell activation (GO:0001773)	38
GO_Biological_Process_2018	positive regulation of peptidyl-tyrosine phosphorylation (GO:0050731)	38
GO_Biological_Process_2018	intracellular protein transport (GO:0006886)	38
GO_Biological_Process_2018	cell-cell adhesion mediated by cadherin (GO:0044331)	38
GO_Biological_Process_2018	neutrophil degranulation (GO:0043312)	38
GO_Biological_Process_2018	positive regulation of cholesterol esterification (GO:0010873)	38
GO_Biological_Process_2018	neutrophil mediated immunity (GO:0002446)	38
GO_Biological_Process_2018	protein transport (GO:0015031)	38
GO_Biological_Process_2018	inorganic cation transmembrane transport (GO:0098662)	37
GO_Biological_Process_2018	organelle membrane fusion (GO:0090174)	37
GO_Biological_Process_2018	regulation of cysteine-type endopeptidase activity (GO:2000116)	37
GO_Biological_Process_2018	positive regulation of B cell proliferation (GO:0030890)	37
GO_Biological_Process_2018	retrograde vesicle-mediated transport, Golgi to ER (GO:0006890)	37
GO_Biological_Process_2018	negative regulation of binding (GO:0051100)	37
GO_Biological_Process_2018	positive regulation of lymphocyte proliferation (GO:0050671)	37
GO_Biological_Process_2018	DNA damage response, signal transduction by p53 class mediator resulting in cell cycle arrest (GO:0006977)	37
GO_Biological_Process_2018	regulation of mitotic spindle checkpoint (GO:1903504)	37
GO_Biological_Process_2018	positive regulation of endopeptidase activity (GO:0010950)	37
GO_Biological_Process_2018	response to cadmium ion (GO:0046686)	36
GO_Biological_Process_2018	regulation of cytolysis (GO:0042268)	36
GO_Biological_Process_2018	sodium-independent organic anion transport (GO:0043252)	36
GO_Biological_Process_2018	negative regulation of serine-type endopeptidase activity (GO:1900004)	36
GO_Biological_Process_2018	negative regulation of serine-type peptidase activity (GO:1902572)	36
GO_Biological_Process_2018	regulation of tyrosine phosphorylation of STAT protein (GO:0042509)	36
GO_Biological_Process_2018	cell morphogenesis (GO:0000902)	36
GO_Biological_Process_2018	regulation of protein tyrosine kinase activity (GO:0061097)	36
GO_Biological_Process_2018	signal transduction involved in mitotic G1 DNA damage checkpoint (GO:0072431)	36
GO_Biological_Process_2018	DNA damage checkpoint (GO:0000077)	36
GO_Biological_Process_2018	zinc ion homeostasis (GO:0055069)	35
GO_Biological_Process_2018	nitrogen compound transport (GO:0071705)	35
GO_Biological_Process_2018	cell-cell adhesion via plasma-membrane adhesion molecules (GO:0098742)	35
GO_Biological_Process_2018	metal ion transport (GO:0030001)	35
GO_Biological_Process_2018	adherens junction organization (GO:0034332)	35
GO_Biological_Process_2018	positive regulation of JAK-STAT cascade (GO:0046427)	35
GO_Biological_Process_2018	regulation of glomerular filtration (GO:0003093)	35
GO_Biological_Process_2018	DNA damage induced protein phosphorylation (GO:0006975)	35
GO_Biological_Process_2018	negative regulation of protein oligomerization (GO:0032460)	35
GO_Biological_Process_2018	protein complex assembly (GO:0006461)	34
GO_Biological_Process_2018	regulation of endopeptidase activity (GO:0052548)	34
GO_Biological_Process_2018	amino acid transmembrane transport (GO:0003333)	34
GO_Biological_Process_2018	proline transport (GO:0015824)	34
GO_Biological_Process_2018	leukotriene metabolic process (GO:0006691)	34
GO_Biological_Process_2018	regulation of steroid biosynthetic process (GO:0050810)	34
GO_Biological_Process_2018	neutrophil migration (GO:1990266)	33
GO_Biological_Process_2018	neutrophil chemotaxis (GO:0030593)	33
GO_Biological_Process_2018	granulocyte chemotaxis (GO:0071621)	33
GO_Biological_Process_2018	response to interleukin-1 (GO:0070555)	33
GO_Biological_Process_2018	myeloid leukocyte differentiation (GO:0002573)	33
GO_Biological_Process_2018	regulation of acrosome reaction (GO:0060046)	33
GO_Biological_Process_2018	regulation of glutamate receptor signaling pathway (GO:1900449)	33
GO_Biological_Process_2018	cell-cell junction organization (GO:0045216)	33
GO_Biological_Process_2018	regulation of fibroblast proliferation (GO:0048145)	33
GO_Biological_Process_2018	lipoprotein transport (GO:0042953)	32
GO_Biological_Process_2018	lipoprotein localization (GO:0044872)	32
GO_Biological_Process_2018	monocyte chemotaxis (GO:0002548)	32
GO_Biological_Process_2018	positive regulation of hydrolase activity (GO:0051345)	32
GO_Biological_Process_2018	mononuclear cell differentiation (GO:1903131)	32
GO_Biological_Process_2018	monocyte differentiation (GO:0030224)	32
GO_Biological_Process_2018	keratan sulfate biosynthetic process (GO:0018146)	32
GO_Biological_Process_2018	positive regulation of cytoplasmic transport (GO:1903651)	32
GO_Biological_Process_2018	positive regulation of tyrosine phosphorylation of STAT protein (GO:0042531)	32
GO_Biological_Process_2018	acetyl-CoA metabolic process (GO:0006084)	32
GO_Biological_Process_2018	lipoprotein metabolic process (GO:0042157)	32
GO_Biological_Process_2018	regulation of sterol transport (GO:0032371)	32
GO_Biological_Process_2018	DNA damage response, signal transduction by p53 class mediator (GO:0030330)	32
GO_Biological_Process_2018	cellular triglyceride homeostasis (GO:0035356)	32
GO_Biological_Process_2018	proton transport (GO:0015992)	32
GO_Biological_Process_2018	cellular divalent inorganic cation homeostasis (GO:0072503)	31
GO_Biological_Process_2018	negative regulation of peptidase activity (GO:0010466)	31
GO_Biological_Process_2018	eosinophil chemotaxis (GO:0048245)	31
GO_Biological_Process_2018	eosinophil migration (GO:0072677)	31
GO_Biological_Process_2018	lymphocyte chemotaxis (GO:0048247)	31
GO_Biological_Process_2018	sodium ion transport (GO:0006814)	31
GO_Biological_Process_2018	positive regulation of transcription, DNA-templated (GO:0045893)	31
GO_Biological_Process_2018	monovalent inorganic cation transport (GO:0015672)	31
GO_Biological_Process_2018	negative regulation of cell aging (GO:0090344)	31
GO_Biological_Process_2018	positive regulation of steroid metabolic process (GO:0045940)	31
GO_Biological_Process_2018	triglyceride homeostasis (GO:0070328)	31
GO_Biological_Process_2018	positive regulation of tumor necrosis factor superfamily cytokine production (GO:1903557)	31
GO_Biological_Process_2018	regulation of signal transduction by p53 class mediator (GO:1901796)	31
GO_Biological_Process_2018	regulation of natural killer cell chemotaxis (GO:2000501)	30
GO_Biological_Process_2018	spliceosomal snRNP assembly (GO:0000387)	30
GO_Biological_Process_2018	regulation of nuclease activity (GO:0032069)	30
GO_Biological_Process_2018	regulation of neurotransmitter receptor activity (GO:0099601)	30
GO_Biological_Process_2018	positive regulation of early endosome to late endosome transport (GO:2000643)	30
GO_Biological_Process_2018	cellular protein complex assembly (GO:0043623)	30
GO_Biological_Process_2018	positive regulation of cellular process (GO:0048522)	30
GO_Biological_Process_2018	negative regulation of protein homooligomerization (GO:0032463)	30
GO_Biological_Process_2018	response to prostaglandin E (GO:0034695)	29
GO_Biological_Process_2018	positive regulation of ATPase activity (GO:0032781)	29
GO_Biological_Process_2018	hematopoietic progenitor cell differentiation (GO:0002244)	29
GO_Biological_Process_2018	response to tumor necrosis factor (GO:0034612)	29
GO_Biological_Process_2018	positive regulation of GTPase activity (GO:0043547)	29
GO_Biological_Process_2018	organic anion transport (GO:0015711)	29
GO_Biological_Process_2018	immunoglobulin mediated immune response (GO:0016064)	29
GO_Biological_Process_2018	proteasome-mediated ubiquitin-dependent protein catabolic process (GO:0043161)	29
GO_Biological_Process_2018	membrane depolarization (GO:0051899)	29
GO_Biological_Process_2018	regulation of cellular component organization (GO:0051128)	29
GO_Biological_Process_2018	positive regulation of calcium ion transport into cytosol (GO:0010524)	29
GO_Biological_Process_2018	cellular response to retinoic acid (GO:0071300)	28
GO_Biological_Process_2018	regulation of GTPase activity (GO:0043087)	28
GO_Biological_Process_2018	cellular response to tumor necrosis factor (GO:0071356)	28
GO_Biological_Process_2018	homophilic cell adhesion via plasma membrane adhesion molecules (GO:0007156)	28
GO_Biological_Process_2018	positive regulation of ion transport (GO:0043270)	28
GO_Biological_Process_2018	regulation of cellular localization (GO:0060341)	28
GO_Biological_Process_2018	regulation of response to external stimulus (GO:0032101)	27
GO_Biological_Process_2018	vitamin transport (GO:0051180)	27
GO_Biological_Process_2018	regulation of regulated secretory pathway (GO:1903305)	27
GO_Biological_Process_2018	iron-sulfur cluster assembly (GO:0016226)	27
GO_Biological_Process_2018	cellular metal ion homeostasis (GO:0006875)	27
GO_Biological_Process_2018	regulation of macromolecule metabolic process (GO:0060255)	27
GO_Biological_Process_2018	response to interferon-gamma (GO:0034341)	27
GO_Biological_Process_2018	cellular response to interleukin-1 (GO:0071347)	27
GO_Biological_Process_2018	positive regulation of MAPK cascade (GO:0043410)	27
GO_Biological_Process_2018	detection of chemical stimulus involved in sensory perception of bitter taste (GO:0001580)	27
GO_Biological_Process_2018	sensory perception of bitter taste (GO:0050913)	27
GO_Biological_Process_2018	positive regulation of nucleic acid-templated transcription (GO:1903508)	27
GO_Biological_Process_2018	regulation of cell cycle G1/S phase transition (GO:1902806)	27
GO_Biological_Process_2018	positive regulation of gene expression (GO:0010628)	27
GO_Biological_Process_2018	cellular protein localization (GO:0034613)	27
GO_Biological_Process_2018	regulation of actin cytoskeleton organization (GO:0032956)	27
GO_Biological_Process_2018	regulation of bile acid biosynthetic process (GO:0070857)	27
GO_Biological_Process_2018	spindle assembly checkpoint (GO:0071173)	27
GO_Biological_Process_2018	mitotic spindle assembly checkpoint (GO:0007094)	27
GO_Biological_Process_2018	mitotic spindle checkpoint (GO:0071174)	27
GO_Biological_Process_2018	positive regulation of ERK1 and ERK2 cascade (GO:0070374)	26
GO_Biological_Process_2018	regulation of ERK1 and ERK2 cascade (GO:0070372)	26
GO_Biological_Process_2018	detection of chemical stimulus involved in sensory perception of taste (GO:0050912)	26
GO_Biological_Process_2018	cation transport (GO:0006812)	26
GO_Biological_Process_2018	regulation of chromosome organization (GO:0033044)	26
GO_Biological_Process_2018	lipoxygenase pathway (GO:0019372)	26
GO_Biological_Process_2018	unsaturated fatty acid biosynthetic process (GO:0006636)	26
GO_Biological_Process_2018	cardiocyte differentiation (GO:0035051)	26
GO_Biological_Process_2018	protein maturation (GO:0051604)	26
GO_Biological_Process_2018	ribonucleoprotein complex disassembly (GO:0032988)	26
GO_Biological_Process_2018	ncRNA metabolic process (GO:0034660)	26
GO_Biological_Process_2018	positive regulation of cytokine production (GO:0001819)	26
GO_Biological_Process_2018	oxoacid metabolic process (GO:0043436)	26
GO_Biological_Process_2018	positive regulation of cell cycle arrest (GO:0071158)	26
GO_Biological_Process_2018	cholesterol homeostasis (GO:0042632)	25
GO_Biological_Process_2018	sterol homeostasis (GO:0055092)	25
GO_Biological_Process_2018	cellular response to metal ion (GO:0071248)	25
GO_Biological_Process_2018	cofactor biosynthetic process (GO:0051188)	25
GO_Biological_Process_2018	cholesterol metabolic process (GO:0008203)	25
GO_Biological_Process_2018	protein homotrimerization (GO:0070207)	25
GO_Biological_Process_2018	positive regulation of type 2 immune response (GO:0002830)	25
GO_Biological_Process_2018	muscle contraction (GO:0006936)	25
GO_Biological_Process_2018	proteasomal protein catabolic process (GO:0010498)	25
GO_Biological_Process_2018	potassium ion import across plasma membrane (GO:1990573)	25
GO_Biological_Process_2018	cell cycle G2/M phase transition (GO:0044839)	25
GO_Biological_Process_2018	G2/M transition of mitotic cell cycle (GO:0000086)	25
GO_Biological_Process_2018	protein lipoylation (GO:0009249)	25
GO_Biological_Process_2018	regulation of endothelial cell proliferation (GO:0001936)	24
GO_Biological_Process_2018	sensory perception of chemical stimulus (GO:0007606)	24
GO_Biological_Process_2018	calcium ion transport (GO:0006816)	24
GO_Biological_Process_2018	negative regulation of neuron death (GO:1901215)	24
GO_Biological_Process_2018	sarcomere organization (GO:0045214)	24
GO_Biological_Process_2018	regulation of ATPase activity (GO:0043462)	24
GO_Biological_Process_2018	B cell mediated immunity (GO:0019724)	24
GO_Biological_Process_2018	response to retinoic acid (GO:0032526)	24
GO_Biological_Process_2018	protein complex disassembly (GO:0043241)	24
GO_Biological_Process_2018	cellular response to ketone (GO:1901655)	24
GO_Biological_Process_2018	regulation of cytoskeleton organization (GO:0051493)	24
GO_Biological_Process_2018	regulation of calcium ion transport into cytosol (GO:0010522)	24
GO_Biological_Process_2018	cellular nitrogen compound catabolic process (GO:0044270)	24
GO_Biological_Process_2018	cell projection assembly (GO:0030031)	24
GO_Biological_Process_2018	regulation of interleukin-18 production (GO:0032661)	23
GO_Biological_Process_2018	actomyosin structure organization (GO:0031032)	23
GO_Biological_Process_2018	negative regulation of acute inflammatory response (GO:0002674)	23
GO_Biological_Process_2018	hemidesmosome assembly (GO:0031581)	23
GO_Biological_Process_2018	cell-substrate junction assembly (GO:0007044)	23
GO_Biological_Process_2018	regulation of fertilization (GO:0080154)	23
GO_Biological_Process_2018	response to axon injury (GO:0048678)	23
GO_Biological_Process_2018	cell junction assembly (GO:0034329)	23
GO_Biological_Process_2018	long-chain fatty acid biosynthetic process (GO:0042759)	23
GO_Biological_Process_2018	regulation of water loss via skin (GO:0033561)	23
GO_Biological_Process_2018	establishment of skin barrier (GO:0061436)	23
GO_Biological_Process_2018	cellular response to organonitrogen compound (GO:0071417)	23
GO_Biological_Process_2018	positive regulation of memory T cell differentiation (GO:0043382)	23
GO_Biological_Process_2018	negative regulation of telomere maintenance (GO:0032205)	23
GO_Biological_Process_2018	muscle cell differentiation (GO:0042692)	23
GO_Biological_Process_2018	endothelial cell development (GO:0001885)	23
GO_Biological_Process_2018	positive regulation of cell proliferation (GO:0008284)	23
GO_Biological_Process_2018	positive regulation of protein import into nucleus, translocation (GO:0033160)	23
GO_Biological_Process_2018	cellular response to oxygen-containing compound (GO:1901701)	23
GO_Biological_Process_2018	sensory perception of smell (GO:0007608)	22
GO_Biological_Process_2018	negative regulation of immune response (GO:0050777)	22
GO_Biological_Process_2018	metallo-sulfur cluster assembly (GO:0031163)	22
GO_Biological_Process_2018	gas homeostasis (GO:0033483)	22
GO_Biological_Process_2018	inactivation of MAPK activity (GO:0000188)	22
GO_Biological_Process_2018	chemokine-mediated signaling pathway (GO:0070098)	22
GO_Biological_Process_2018	myofibril assembly (GO:0030239)	22
GO_Biological_Process_2018	cellular response to alcohol (GO:0097306)	22
GO_Biological_Process_2018	fibroblast growth factor receptor signaling pathway (GO:0008543)	22
GO_Biological_Process_2018	acyl-CoA metabolic process (GO:0006637)	22
GO_Biological_Process_2018	activation of GTPase activity (GO:0090630)	22
GO_Biological_Process_2018	fatty acid metabolic process (GO:0006631)	22
GO_Biological_Process_2018	regulation of intracellular signal transduction (GO:1902531)	22
GO_Biological_Process_2018	MAPK cascade (GO:0000165)	22
GO_Biological_Process_2018	cellular response to nitric oxide (GO:0071732)	22
GO_Biological_Process_2018	cellular response to reactive nitrogen species (GO:1902170)	22
GO_Biological_Process_2018	nuclear export (GO:0051168)	22
GO_Biological_Process_2018	cAMP metabolic process (GO:0046058)	22
GO_Biological_Process_2018	platelet-derived growth factor receptor signaling pathway (GO:0048008)	22
GO_Biological_Process_2018	regulation of telomere maintenance via telomere lengthening (GO:1904356)	22
GO_Biological_Process_2018	establishment of endothelial barrier (GO:0061028)	22
GO_Biological_Process_2018	regulation of neurotransmitter secretion (GO:0046928)	22
GO_Biological_Process_2018	cellular transition metal ion homeostasis (GO:0046916)	21
GO_Biological_Process_2018	skeletal muscle contraction (GO:0003009)	21
GO_Biological_Process_2018	negative regulation of cell differentiation (GO:0045596)	21
GO_Biological_Process_2018	regulation of cardiac muscle hypertrophy (GO:0010611)	21
GO_Biological_Process_2018	negative regulation of cardiac muscle hypertrophy (GO:0010614)	21
GO_Biological_Process_2018	positive regulation of protein export from nucleus (GO:0046827)	21
GO_Biological_Process_2018	regulation of protein export from nucleus (GO:0046825)	21
GO_Biological_Process_2018	muscle filament sliding (GO:0030049)	21
GO_Biological_Process_2018	actin-myosin filament sliding (GO:0033275)	21
GO_Biological_Process_2018	regulation of transcription from RNA polymerase II promoter in response to oxidative stress (GO:0043619)	21
GO_Biological_Process_2018	aspartate family amino acid catabolic process (GO:0009068)	21
GO_Biological_Process_2018	icosanoid metabolic process (GO:0006690)	21
GO_Biological_Process_2018	nuclear import (GO:0051170)	21
GO_Biological_Process_2018	acute inflammatory response (GO:0002526)	21
GO_Biological_Process_2018	vesicle-mediated transport (GO:0016192)	21
GO_Biological_Process_2018	regulation of tumor necrosis factor production (GO:0032680)	21
GO_Biological_Process_2018	protein-cofactor linkage (GO:0018065)	21
GO_Biological_Process_2018	negative regulation of cellular senescence (GO:2000773)	21
GO_Biological_Process_2018	positive regulation of steroid biosynthetic process (GO:0010893)	21
GO_Biological_Process_2018	striated muscle tissue development (GO:0014706)	20
GO_Biological_Process_2018	release of sequestered calcium ion into cytosol by endoplasmic reticulum (GO:1903514)	20
GO_Biological_Process_2018	axon development (GO:0061564)	20
GO_Biological_Process_2018	calcium ion homeostasis (GO:0055074)	20
GO_Biological_Process_2018	regulation of dendritic cell antigen processing and presentation (GO:0002604)	20
GO_Biological_Process_2018	regulation of leukocyte migration (GO:0002685)	20
GO_Biological_Process_2018	chemical synaptic transmission (GO:0007268)	20
GO_Biological_Process_2018	negative regulation of JAK-STAT cascade (GO:0046426)	20
GO_Biological_Process_2018	mitotic nuclear division (GO:0140014)	20
GO_Biological_Process_2018	cellular response to hypoxia (GO:0071456)	20
GO_Biological_Process_2018	positive regulation of smooth muscle cell proliferation (GO:0048661)	20
GO_Biological_Process_2018	regulation of establishment of planar polarity (GO:0090175)	20
GO_Biological_Process_2018	non-canonical Wnt signaling pathway (GO:0035567)	20
GO_Biological_Process_2018	chromosome organization (GO:0051276)	20
GO_Biological_Process_2018	Wnt signaling pathway, planar cell polarity pathway (GO:0060071)	20
GO_Biological_Process_2018	sister chromatid segregation (GO:0000819)	20
GO_Biological_Process_2018	positive regulation of stress fiber assembly (GO:0051496)	20
GO_Biological_Process_2018	establishment of spindle localization (GO:0051293)	20
GO_Biological_Process_2018	regulation of G2/M transition of mitotic cell cycle (GO:0010389)	20
GO_Biological_Process_2018	response to endoplasmic reticulum stress (GO:0034976)	20
GO_Biological_Process_2018	phospholipid transport (GO:0015914)	20
GO_Biological_Process_2018	negative regulation of intrinsic apoptotic signaling pathway in response to DNA damage by p53 class mediator (GO:1902166)	20
GO_Biological_Process_2018	positive regulation of protein secretion (GO:0050714)	20
GO_Biological_Process_2018	cellular response to prostaglandin E stimulus (GO:0071380)	19
GO_Biological_Process_2018	negative regulation of endothelial cell proliferation (GO:0001937)	19
GO_Biological_Process_2018	regulation of phosphatase activity (GO:0010921)	19
GO_Biological_Process_2018	midbrain dopaminergic neuron differentiation (GO:1904948)	19
GO_Biological_Process_2018	positive regulation of keratinocyte differentiation (GO:0045618)	19
GO_Biological_Process_2018	histone lysine methylation (GO:0034968)	19
GO_Biological_Process_2018	cellular response to magnesium ion (GO:0071286)	19
GO_Biological_Process_2018	adipose tissue development (GO:0060612)	19
GO_Biological_Process_2018	regulation of cell migration involved in sprouting angiogenesis (GO:0090049)	19
GO_Biological_Process_2018	regulation of transforming growth factor beta2 production (GO:0032909)	19
GO_Biological_Process_2018	cell morphogenesis involved in neuron differentiation (GO:0048667)	19
GO_Biological_Process_2018	microtubule nucleation by microtubule organizing center (GO:0051418)	19
GO_Biological_Process_2018	strand invasion (GO:0042148)	19
GO_Biological_Process_2018	positive regulation of nucleocytoplasmic transport (GO:0046824)	19
GO_Biological_Process_2018	positive regulation of T cell chemotaxis (GO:0010820)	19
GO_Biological_Process_2018	protein modification by small protein removal (GO:0070646)	19
GO_Biological_Process_2018	actin filament organization (GO:0007015)	19
GO_Biological_Process_2018	negative regulation of epithelial cell migration (GO:0010633)	19
GO_Biological_Process_2018	positive regulation of calcium-mediated signaling (GO:0050850)	19
GO_Biological_Process_2018	negative regulation of leukocyte degranulation (GO:0043301)	19
GO_Biological_Process_2018	positive regulation of calcium ion transport (GO:0051928)	19
GO_Biological_Process_2018	DNA recombinase assembly (GO:0000730)	19
GO_Biological_Process_2018	DNA repair complex assembly (GO:0090735)	19
GO_Biological_Process_2018	double-strand break repair via synthesis-dependent strand annealing (GO:0045003)	19
GO_Biological_Process_2018	histone H2A-K119 monoubiquitination (GO:0036353)	19
GO_Biological_Process_2018	sulfur compound transport (GO:0072348)	19
GO_Biological_Process_2018	regulation of muscle cell differentiation (GO:0051147)	19
GO_Biological_Process_2018	protein deubiquitination (GO:0016579)	19
GO_Biological_Process_2018	regulation of vesicle-mediated transport (GO:0060627)	19
GO_Biological_Process_2018	regulation of mRNA splicing, via spliceosome (GO:0048024)	19
GO_Biological_Process_2018	ceramide biosynthetic process (GO:0046513)	19
GO_Biological_Process_2018	regulation of mitotic cell cycle (GO:0007346)	19
GO_Biological_Process_2018	fructose metabolic process (GO:0006000)	19
GO_Biological_Process_2018	cleavage furrow formation (GO:0036089)	19
GO_Biological_Process_2018	positive regulation of blood vessel endothelial cell migration (GO:0043536)	19
GO_Biological_Process_2018	long term synaptic depression (GO:0060292)	19
GO_Biological_Process_2018	ribonucleoprotein complex assembly (GO:0022618)	19
GO_Biological_Process_2018	excitatory postsynaptic potential (GO:0060079)	19
GO_Biological_Process_2018	chemical synaptic transmission, postsynaptic (GO:0099565)	19
GO_Biological_Process_2018	regulation of postsynaptic membrane potential (GO:0060078)	19
GO_Biological_Process_2018	regulation of early endosome to late endosome transport (GO:2000641)	19
GO_Biological_Process_2018	regulation of type I interferon production (GO:0032479)	19
GO_Biological_Process_2018	regulation of gene expression (GO:0010468)	18
GO_Biological_Process_2018	negative regulation of phosphatase activity (GO:0010923)	18
GO_Biological_Process_2018	regulation of regulatory T cell differentiation (GO:0045589)	18
GO_Biological_Process_2018	negative regulation of macrophage derived foam cell differentiation (GO:0010745)	18
GO_Biological_Process_2018	positive regulation of interleukin-1 beta secretion (GO:0050718)	18
GO_Biological_Process_2018	negative regulation of dendritic cell apoptotic process (GO:2000669)	18
GO_Biological_Process_2018	cellular calcium ion homeostasis (GO:0006874)	18
GO_Biological_Process_2018	positive regulation of protein depolymerization (GO:1901881)	18
GO_Biological_Process_2018	myeloid dendritic cell differentiation (GO:0043011)	18
GO_Biological_Process_2018	negative regulation of sprouting angiogenesis (GO:1903671)	18
GO_Biological_Process_2018	regulation of transcription from RNA polymerase II promoter in response to stress (GO:0043618)	18
GO_Biological_Process_2018	spindle assembly (GO:0051225)	18
GO_Biological_Process_2018	negative regulation of cell migration involved in sprouting angiogenesis (GO:0090051)	18
GO_Biological_Process_2018	cellular response to growth factor stimulus (GO:0071363)	18
GO_Biological_Process_2018	Golgi organization (GO:0007030)	18
GO_Biological_Process_2018	ubiquitin-dependent protein catabolic process via the multivesicular body sorting pathway (GO:0043162)	18
GO_Biological_Process_2018	positive regulation of ubiquitin protein ligase activity (GO:1904668)	18
GO_Biological_Process_2018	photoreceptor cell differentiation (GO:0046530)	18
GO_Biological_Process_2018	positive regulation of extrinsic apoptotic signaling pathway via death domain receptors (GO:1902043)	18
GO_Biological_Process_2018	positive regulation of cardiac muscle cell differentiation (GO:2000727)	18
GO_Biological_Process_2018	response to magnesium ion (GO:0032026)	18
GO_Biological_Process_2018	anaphase-promoting complex-dependent catabolic process (GO:0031145)	18
GO_Biological_Process_2018	cytoplasmic microtubule organization (GO:0031122)	18
GO_Biological_Process_2018	cytoskeletal anchoring at plasma membrane (GO:0007016)	18
GO_Biological_Process_2018	positive regulation of regulated secretory pathway (GO:1903307)	18
GO_Biological_Process_2018	negative regulation of ubiquitin-protein ligase activity involved in mitotic cell cycle (GO:0051436)	18
GO_Biological_Process_2018	catecholamine transport (GO:0051937)	18
GO_Biological_Process_2018	regulation of vascular smooth muscle cell proliferation (GO:1904705)	18
GO_Biological_Process_2018	inhibition of cysteine-type endopeptidase activity (GO:0097340)	18
GO_Biological_Process_2018	regulation of viral genome replication (GO:0045069)	18
GO_Biological_Process_2018	positive regulation of leukocyte degranulation (GO:0043302)	18
GO_Biological_Process_2018	calcium ion transport into cytosol (GO:0060402)	18
GO_Biological_Process_2018	regulation of cell cycle G2/M phase transition (GO:1902749)	18
GO_Biological_Process_2018	lipid transport (GO:0006869)	18
GO_Biological_Process_2018	hemopoiesis (GO:0030097)	17
GO_Biological_Process_2018	positive regulation of interleukin-1 beta production (GO:0032731)	17
GO_Biological_Process_2018	positive regulation of defense response (GO:0031349)	17
GO_Biological_Process_2018	macrophage chemotaxis (GO:0048246)	17
GO_Biological_Process_2018	macrophage migration (GO:1905517)	17
GO_Biological_Process_2018	oxygen homeostasis (GO:0032364)	17
GO_Biological_Process_2018	negative regulation of epithelial to mesenchymal transition (GO:0010719)	17
GO_Biological_Process_2018	negative regulation of necroptotic process (GO:0060546)	17
GO_Biological_Process_2018	T-helper cell lineage commitment (GO:0002295)	17
GO_Biological_Process_2018	leukocyte adhesion to vascular endothelial cell (GO:0061756)	17
GO_Biological_Process_2018	leukocyte tethering or rolling (GO:0050901)	17
GO_Biological_Process_2018	porphyrin-containing compound biosynthetic process (GO:0006779)	17
GO_Biological_Process_2018	heme biosynthetic process (GO:0006783)	17
GO_Biological_Process_2018	negative regulation of membrane protein ectodomain proteolysis (GO:0051045)	17
GO_Biological_Process_2018	calcium ion transmembrane transport (GO:0070588)	17
GO_Biological_Process_2018	mitotic spindle assembly (GO:0090307)	17
GO_Biological_Process_2018	regulation of transcription from RNA polymerase II promoter in response to hypoxia (GO:0061418)	17
GO_Biological_Process_2018	regulation of vesicle fusion (GO:0031338)	17
GO_Biological_Process_2018	response to laminar fluid shear stress (GO:0034616)	17
GO_Biological_Process_2018	negative regulation of pathway-restricted SMAD protein phosphorylation (GO:0060394)	17
GO_Biological_Process_2018	regulation of T cell chemotaxis (GO:0010819)	17
GO_Biological_Process_2018	basement membrane organization (GO:0071711)	17
GO_Biological_Process_2018	DNA synthesis involved in DNA repair (GO:0000731)	17
GO_Biological_Process_2018	ubiquitin-dependent protein catabolic process (GO:0006511)	17
GO_Biological_Process_2018	protection from non-homologous end joining at telomere (GO:0031848)	17
GO_Biological_Process_2018	regulation of transcription involved in cell fate commitment (GO:0060850)	17
GO_Biological_Process_2018	positive regulation of histone acetylation (GO:0035066)	17
GO_Biological_Process_2018	regulation of cation channel activity (GO:2001257)	17
GO_Biological_Process_2018	regulation of alternative mRNA splicing, via spliceosome (GO:0000381)	17
GO_Biological_Process_2018	regulation of ubiquitin-protein ligase activity involved in mitotic cell cycle (GO:0051439)	17
GO_Biological_Process_2018	drug transmembrane transport (GO:0006855)	17
GO_Biological_Process_2018	Wnt signaling pathway involved in midbrain dopaminergic neuron differentiation (GO:1904953)	17
GO_Biological_Process_2018	negative regulation of MAPK cascade (GO:0043409)	17
GO_Biological_Process_2018	extracellular matrix organization (GO:0030198)	17
GO_Biological_Process_2018	negative regulation of cell adhesion (GO:0007162)	17
GO_Biological_Process_2018	cellular response to inorganic substance (GO:0071241)	17
GO_Biological_Process_2018	negative regulation of immune system process (GO:0002683)	16
GO_Biological_Process_2018	negative regulation of defense response (GO:0031348)	16
GO_Biological_Process_2018	intracellular sterol transport (GO:0032366)	16
GO_Biological_Process_2018	neurotransmitter receptor diffusion trapping (GO:0099628)	16
GO_Biological_Process_2018	postsynaptic neurotransmitter receptor diffusion trapping (GO:0098970)	16
GO_Biological_Process_2018	cytoskeleton organization (GO:0007010)	16
GO_Biological_Process_2018	positive regulation of inflammatory response (GO:0050729)	16
GO_Biological_Process_2018	dendritic cell chemotaxis (GO:0002407)	16
GO_Biological_Process_2018	negative regulation of cysteine-type endopeptidase activity (GO:2000117)	16
GO_Biological_Process_2018	calcium ion import (GO:0070509)	16
GO_Biological_Process_2018	T-helper 17 cell differentiation (GO:0072539)	16
GO_Biological_Process_2018	interphase microtubule nucleation by interphase microtubule organizing center (GO:0051415)	16
GO_Biological_Process_2018	negative regulation of blood vessel endothelial cell migration (GO:0043537)	16
GO_Biological_Process_2018	mitochondrial transport (GO:0006839)	16
GO_Biological_Process_2018	amide biosynthetic process (GO:0043604)	16
GO_Biological_Process_2018	positive regulation of actin filament bundle assembly (GO:0032233)	16
GO_Biological_Process_2018	semaphorin-plexin signaling pathway (GO:0071526)	16
GO_Biological_Process_2018	mitotic sister chromatid segregation (GO:0000070)	16
GO_Biological_Process_2018	negative regulation of ubiquitin protein ligase activity (GO:1904667)	16
GO_Biological_Process_2018	negative regulation of oxidative stress-induced cell death (GO:1903202)	16
GO_Biological_Process_2018	positive regulation of SMAD protein import into nucleus (GO:0060391)	16
GO_Biological_Process_2018	regulation of RNA polymerase II transcriptional preinitiation complex assembly (GO:0045898)	16
GO_Biological_Process_2018	cardiac muscle tissue development (GO:0048738)	16
GO_Biological_Process_2018	energy coupled proton transport, down electrochemical gradient (GO:0015985)	16
GO_Biological_Process_2018	negative regulation of intrinsic apoptotic signaling pathway by p53 class mediator (GO:1902254)	16
GO_Biological_Process_2018	positive regulation of myoblast differentiation (GO:0045663)	16
GO_Biological_Process_2018	positive regulation of catecholamine secretion (GO:0033605)	16
GO_Biological_Process_2018	SCF complex assembly (GO:0010265)	16
GO_Biological_Process_2018	response to dopamine (GO:1903350)	16
GO_Biological_Process_2018	cellular response to dopamine (GO:1903351)	16
GO_Biological_Process_2018	lysosome organization (GO:0007040)	16
GO_Biological_Process_2018	inflammatory response (GO:0006954)	15
GO_Biological_Process_2018	divalent metal ion transport (GO:0070838)	15
GO_Biological_Process_2018	positive regulation of CD4-positive, alpha-beta T cell activation (GO:2000516)	15
GO_Biological_Process_2018	negative regulation of cytokine production involved in immune response (GO:0002719)	15
GO_Biological_Process_2018	brain morphogenesis (GO:0048854)	15
GO_Biological_Process_2018	negative regulation of dephosphorylation (GO:0035305)	15
GO_Biological_Process_2018	regulation of striated muscle contraction (GO:0006942)	15
GO_Biological_Process_2018	negative regulation of transcription, DNA-templated (GO:0045892)	15
GO_Biological_Process_2018	response to organic cyclic compound (GO:0014070)	15
GO_Biological_Process_2018	positive regulation of immunoglobulin production (GO:0002639)	15
GO_Biological_Process_2018	establishment of protein localization to vacuole (GO:0072666)	15
GO_Biological_Process_2018	response to growth factor (GO:0070848)	15
GO_Biological_Process_2018	positive regulation of DNA-templated transcription, elongation (GO:0032786)	15
GO_Biological_Process_2018	positive regulation of NF-kappaB transcription factor activity (GO:0051092)	15
GO_Biological_Process_2018	ceramide metabolic process (GO:0006672)	15
GO_Biological_Process_2018	cellular response to increased oxygen levels (GO:0036295)	15
GO_Biological_Process_2018	neurotrophin TRK receptor signaling pathway (GO:0048011)	15
GO_Biological_Process_2018	negative regulation of muscle hypertrophy (GO:0014741)	15
GO_Biological_Process_2018	positive regulation of ubiquitin-protein ligase activity involved in regulation of mitotic cell cycle transition (GO:0051437)	15
GO_Biological_Process_2018	negative regulation of mitotic cell cycle phase transition (GO:1901991)	15
GO_Biological_Process_2018	positive regulation of vascular smooth muscle cell proliferation (GO:1904707)	15
GO_Biological_Process_2018	ESCRT complex disassembly (GO:1904896)	15
GO_Biological_Process_2018	ESCRT III complex disassembly (GO:1904903)	15
GO_Biological_Process_2018	mesodermal cell differentiation (GO:0048333)	15
GO_Biological_Process_2018	negative regulation of homeostatic process (GO:0032845)	15
GO_Biological_Process_2018	positive regulation of nitric-oxide synthase activity (GO:0051000)	15
GO_Biological_Process_2018	molybdopterin cofactor metabolic process (GO:0043545)	15
GO_Biological_Process_2018	molybdopterin cofactor biosynthetic process (GO:0032324)	15
GO_Biological_Process_2018	regulation of cellular response to heat (GO:1900034)	15
GO_Biological_Process_2018	leukotriene biosynthetic process (GO:0019370)	15
GO_Biological_Process_2018	cytoskeletal anchoring at nuclear membrane (GO:0090286)	15
GO_Biological_Process_2018	regulation of protein localization to centrosome (GO:1904779)	15
GO_Biological_Process_2018	RNA secondary structure unwinding (GO:0010501)	15
GO_Biological_Process_2018	regulation of synaptic transmission, dopaminergic (GO:0032225)	15
GO_Biological_Process_2018	positive regulation of T cell differentiation (GO:0045582)	15
GO_Biological_Process_2018	signal complex assembly (GO:0007172)	15
GO_Biological_Process_2018	positive regulation of monooxygenase activity (GO:0032770)	15
GO_Biological_Process_2018	catecholamine metabolic process (GO:0006584)	15
GO_Biological_Process_2018	regulation of telomere capping (GO:1904353)	15
GO_Biological_Process_2018	positive regulation of telomere maintenance via telomere lengthening (GO:1904358)	15
GO_Biological_Process_2018	positive regulation of cell cycle phase transition (GO:1901989)	15
GO_Biological_Process_2018	defense response to Gram-negative bacterium (GO:0050829)	15
GO_Biological_Process_2018	negative regulation of cellular response to hypoxia (GO:1900038)	14
GO_Biological_Process_2018	positive regulation of immune system process (GO:0002684)	14
GO_Biological_Process_2018	cholesterol efflux (GO:0033344)	14
GO_Biological_Process_2018	positive regulation of alpha-beta T cell proliferation (GO:0046641)	14
GO_Biological_Process_2018	activation of cysteine-type endopeptidase activity (GO:0097202)	14
GO_Biological_Process_2018	negative regulation of STAT cascade (GO:1904893)	14
GO_Biological_Process_2018	glycerophospholipid metabolic process (GO:0006650)	14
GO_Biological_Process_2018	phosphatidylinositol biosynthetic process (GO:0006661)	14
GO_Biological_Process_2018	positive regulation of sequence-specific DNA binding transcription factor activity (GO:0051091)	14
GO_Biological_Process_2018	monoterpenoid metabolic process (GO:0016098)	14
GO_Biological_Process_2018	strand displacement (GO:0000732)	14
GO_Biological_Process_2018	DNA biosynthetic process (GO:0071897)	14
GO_Biological_Process_2018	cellular potassium ion homeostasis (GO:0030007)	14
GO_Biological_Process_2018	positive regulation of T cell migration (GO:2000406)	14
GO_Biological_Process_2018	regulation of cellular ketone metabolic process (GO:0010565)	14
GO_Biological_Process_2018	negative regulation of protein kinase B signaling (GO:0051898)	14
GO_Biological_Process_2018	response to sterol (GO:0036314)	14
GO_Biological_Process_2018	mitotic spindle elongation (GO:0000022)	14
GO_Biological_Process_2018	regulation of cellular amine metabolic process (GO:0033238)	14
GO_Biological_Process_2018	regulation of cellular amino acid metabolic process (GO:0006521)	14
GO_Biological_Process_2018	regulation of glycoprotein biosynthetic process (GO:0010559)	14
GO_Biological_Process_2018	tetrahydrofolate interconversion (GO:0035999)	14
GO_Biological_Process_2018	polyol metabolic process (GO:0019751)	14
GO_Biological_Process_2018	inositol phosphate metabolic process (GO:0043647)	14
GO_Biological_Process_2018	DNA metabolic process (GO:0006259)	14
GO_Biological_Process_2018	intra-Golgi vesicle-mediated transport (GO:0006891)	14
GO_Biological_Process_2018	sulfur amino acid biosynthetic process (GO:0000097)	14
GO_Biological_Process_2018	triglyceride-rich lipoprotein particle remodeling (GO:0034370)	14
GO_Biological_Process_2018	potassium ion transport (GO:0006813)	14
GO_Biological_Process_2018	regulation of tissue remodeling (GO:0034103)	14
GO_Biological_Process_2018	acute-phase response (GO:0006953)	14
GO_Biological_Process_2018	cellular response to lipid (GO:0071396)	14
GO_Biological_Process_2018	regulation of transcription, DNA-templated (GO:0006355)	13
GO_Biological_Process_2018	regulation of cholesterol transport (GO:0032374)	13
GO_Biological_Process_2018	cellular response to transforming growth factor beta stimulus (GO:0071560)	13
GO_Biological_Process_2018	regulation of dendritic cell differentiation (GO:2001198)	13
GO_Biological_Process_2018	negative regulation of MAP kinase activity (GO:0043407)	13
GO_Biological_Process_2018	regulation of calcium ion transport (GO:0051924)	13
GO_Biological_Process_2018	protein transmembrane import into intracellular organelle (GO:0044743)	13
GO_Biological_Process_2018	negative regulation of transcription from RNA polymerase II promoter (GO:0000122)	13
GO_Biological_Process_2018	amyloid precursor protein catabolic process (GO:0042987)	13
GO_Biological_Process_2018	adherens junction assembly (GO:0034333)	13
GO_Biological_Process_2018	negative regulation of cellular protein localization (GO:1903828)	13
GO_Biological_Process_2018	glycerophospholipid biosynthetic process (GO:0046474)	13
GO_Biological_Process_2018	negative regulation of RIG-I signaling pathway (GO:0039536)	13
GO_Biological_Process_2018	negative regulation of glial cell apoptotic process (GO:0034351)	13
GO_Biological_Process_2018	negative regulation of transforming growth factor beta receptor signaling pathway (GO:0030512)	13
GO_Biological_Process_2018	positive regulation of cell adhesion mediated by integrin (GO:0033630)	13
GO_Biological_Process_2018	dicarboxylic acid catabolic process (GO:0043649)	13
GO_Biological_Process_2018	regulation of SMAD protein import into nucleus (GO:0060390)	13
GO_Biological_Process_2018	positive regulation of phosphatidylinositol 3-kinase signaling (GO:0014068)	13
GO_Biological_Process_2018	protein complex subunit organization (GO:0071822)	13
GO_Biological_Process_2018	positive regulation of protein ubiquitination involved in ubiquitin-dependent protein catabolic process (GO:2000060)	13
GO_Biological_Process_2018	positive regulation of neurological system process (GO:0031646)	13
GO_Biological_Process_2018	phosphate-containing compound metabolic process (GO:0006796)	13
GO_Biological_Process_2018	viral translation (GO:0019081)	13
GO_Biological_Process_2018	positive regulation of insulin-like growth factor receptor signaling pathway (GO:0043568)	13
GO_Biological_Process_2018	regulation of insulin-like growth factor receptor signaling pathway (GO:0043567)	13
GO_Biological_Process_2018	cell-cell junction maintenance (GO:0045217)	13
GO_Biological_Process_2018	import across plasma membrane (GO:0098739)	13
GO_Biological_Process_2018	regulation of MHC class II biosynthetic process (GO:0045346)	13
GO_Biological_Process_2018	hydrogen ion transmembrane transport (GO:1902600)	13
GO_Biological_Process_2018	positive regulation of tumor necrosis factor production (GO:0032760)	13
GO_Biological_Process_2018	cell junction maintenance (GO:0034331)	13
GO_Biological_Process_2018	metanephros development (GO:0001656)	13
GO_Biological_Process_2018	regulation of nucleic acid-templated transcription (GO:1903506)	12
GO_Biological_Process_2018	COPII-coated vesicle budding (GO:0090114)	12
GO_Biological_Process_2018	COPII vesicle coating (GO:0048208)	12
GO_Biological_Process_2018	vesicle targeting, rough ER to cis-Golgi (GO:0048207)	12
GO_Biological_Process_2018	vesicle coating (GO:0006901)	12
GO_Biological_Process_2018	cellular response to prostaglandin stimulus (GO:0071379)	12
GO_Biological_Process_2018	negative regulation of inflammatory response (GO:0050728)	12
GO_Biological_Process_2018	membrane raft organization (GO:0031579)	12
GO_Biological_Process_2018	cellular response to cytokine stimulus (GO:0071345)	12
GO_Biological_Process_2018	cellular response to interferon-gamma (GO:0071346)	12
GO_Biological_Process_2018	ATP synthesis coupled electron transport (GO:0042773)	12
GO_Biological_Process_2018	regulation of intracellular pH (GO:0051453)	12
GO_Biological_Process_2018	neurotransmitter receptor transport, postsynaptic endosome to lysosome (GO:0098943)	12
GO_Biological_Process_2018	cellular response to UV-B (GO:0071493)	12
GO_Biological_Process_2018	cytoskeleton-dependent cytokinesis (GO:0061640)	12
GO_Biological_Process_2018	negative regulation of peptidyl-tyrosine phosphorylation (GO:0050732)	12
GO_Biological_Process_2018	positive regulation of dendritic cell chemotaxis (GO:2000510)	12
GO_Biological_Process_2018	terpenoid metabolic process (GO:0006721)	12
GO_Biological_Process_2018	myoblast differentiation (GO:0045445)	12
GO_Biological_Process_2018	regulation of cellular catabolic process (GO:0031329)	12
GO_Biological_Process_2018	small GTPase mediated signal transduction (GO:0007264)	12
GO_Biological_Process_2018	positive regulation of branching involved in ureteric bud morphogenesis (GO:0090190)	12
GO_Biological_Process_2018	multivesicular body organization (GO:0036257)	12
GO_Biological_Process_2018	endothelial cell differentiation (GO:0045446)	12
GO_Biological_Process_2018	T-helper cell differentiation (GO:0042093)	12
GO_Biological_Process_2018	cellular response to organic cyclic compound (GO:0071407)	12
GO_Biological_Process_2018	intracellular lipid transport (GO:0032365)	12
GO_Biological_Process_2018	regulation of muscle contraction (GO:0006937)	12
GO_Biological_Process_2018	regulation of transcription from RNA polymerase II promoter (GO:0006357)	12
GO_Biological_Process_2018	negative regulation of immune effector process (GO:0002698)	12
GO_Biological_Process_2018	positive regulation of bone remodeling (GO:0046852)	12
GO_Biological_Process_2018	positive regulation of bone resorption (GO:0045780)	12
GO_Biological_Process_2018	glucocorticoid metabolic process (GO:0008211)	12
GO_Biological_Process_2018	IRES-dependent viral translational initiation (GO:0075522)	12
GO_Biological_Process_2018	positive regulation of protein localization to centrosome (GO:1904781)	12
GO_Biological_Process_2018	regulation of interleukin-6 production (GO:0032675)	12
GO_Biological_Process_2018	regulation of mitotic cell cycle spindle assembly checkpoint (GO:0090266)	12
GO_Biological_Process_2018	protein localization to nuclear envelope (GO:0090435)	12
GO_Biological_Process_2018	regulation of interleukin-17 production (GO:0032660)	12
GO_Biological_Process_2018	spermatid development (GO:0007286)	12
GO_Biological_Process_2018	positive regulation of cytokine secretion (GO:0050715)	12
GO_Biological_Process_2018	lipid biosynthetic process (GO:0008610)	12
GO_Biological_Process_2018	antimicrobial humoral immune response mediated by antimicrobial peptide (GO:0061844)	12
GO_Biological_Process_2018	regulation of release of cytochrome c from mitochondria (GO:0090199)	12
GO_Biological_Process_2018	actin cytoskeleton reorganization (GO:0031532)	12
GO_Biological_Process_2018	skeletal muscle organ development (GO:0060538)	11
GO_Biological_Process_2018	positive regulation of epithelial cell proliferation (GO:0050679)	11
GO_Biological_Process_2018	regulation of blood vessel endothelial cell migration (GO:0043535)	11
GO_Biological_Process_2018	regulation of dopamine receptor signaling pathway (GO:0060159)	11
GO_Biological_Process_2018	protein monoubiquitination (GO:0006513)	11
GO_Biological_Process_2018	striated muscle contraction (GO:0006941)	11
GO_Biological_Process_2018	negative regulation of B cell proliferation (GO:0030889)	11
GO_Biological_Process_2018	regulation of dendritic cell apoptotic process (GO:2000668)	11
GO_Biological_Process_2018	positive regulation of mRNA processing (GO:0050685)	11
GO_Biological_Process_2018	protein processing (GO:0016485)	11
GO_Biological_Process_2018	actin filament-based transport (GO:0099515)	11
GO_Biological_Process_2018	mitotic spindle organization (GO:0007052)	11
GO_Biological_Process_2018	Notch receptor processing, ligand-dependent (GO:0035333)	11
GO_Biological_Process_2018	negative regulation of heterotypic cell-cell adhesion (GO:0034115)	11
GO_Biological_Process_2018	regulation of cell-cell adhesion involved in gastrulation (GO:0070587)	11
GO_Biological_Process_2018	positive regulation of calcineurin-NFAT signaling cascade (GO:0070886)	11
GO_Biological_Process_2018	regulation of membrane depolarization (GO:0003254)	11
GO_Biological_Process_2018	mitochondrial calcium ion transmembrane transport (GO:0006851)	11
GO_Biological_Process_2018	regulation of phosphatidylinositol 3-kinase signaling (GO:0014066)	11
GO_Biological_Process_2018	SCF-dependent proteasomal ubiquitin-dependent protein catabolic process (GO:0031146)	11
GO_Biological_Process_2018	positive regulation of protein kinase activity (GO:0045860)	11
GO_Biological_Process_2018	negative regulation of cellular response to transforming growth factor beta stimulus (GO:1903845)	11
GO_Biological_Process_2018	RNA export from nucleus (GO:0006405)	11
GO_Biological_Process_2018	cellular response to DNA damage stimulus (GO:0006974)	11
GO_Biological_Process_2018	negative regulation of G2/M transition of mitotic cell cycle (GO:0010972)	11
GO_Biological_Process_2018	heterocycle biosynthetic process (GO:0018130)	11
GO_Biological_Process_2018	positive regulation of cardiocyte differentiation (GO:1905209)	11
GO_Biological_Process_2018	cellular hyperosmotic response (GO:0071474)	11
GO_Biological_Process_2018	regulation of t-circle formation (GO:1904429)	11
GO_Biological_Process_2018	positive regulation of embryonic development (GO:0040019)	11
GO_Biological_Process_2018	phosphate ion homeostasis (GO:0055062)	11
GO_Biological_Process_2018	anatomical structure homeostasis (GO:0060249)	11
GO_Biological_Process_2018	positive regulation of protein modification process (GO:0031401)	11
GO_Biological_Process_2018	negative regulation of telomere maintenance via telomere lengthening (GO:1904357)	11
GO_Biological_Process_2018	negative regulation of protein kinase activity (GO:0006469)	11
GO_Biological_Process_2018	negative regulation of double-strand break repair (GO:2000780)	11
GO_Biological_Process_2018	response to ionizing radiation (GO:0010212)	11
GO_Biological_Process_2018	lipid catabolic process (GO:0016042)	10
GO_Biological_Process_2018	amide transport (GO:0042886)	10
GO_Biological_Process_2018	negative regulation of hydrogen peroxide-induced cell death (GO:1903206)	10
GO_Biological_Process_2018	regulation of immunoglobulin mediated immune response (GO:0002889)	10
GO_Biological_Process_2018	lens fiber cell development (GO:0070307)	10
GO_Biological_Process_2018	RNA interference (GO:0016246)	10
GO_Biological_Process_2018	negative regulation of calcium ion transport (GO:0051926)	10
GO_Biological_Process_2018	negative regulation of interleukin-1 beta production (GO:0032691)	10
GO_Biological_Process_2018	mitochondrion distribution (GO:0048311)	10
GO_Biological_Process_2018	transcription from RNA polymerase II promoter (GO:0006366)	10
GO_Biological_Process_2018	cranial nerve development (GO:0021545)	10
GO_Biological_Process_2018	regulation of cardiac muscle cell action potential (GO:0098901)	10
GO_Biological_Process_2018	organelle assembly (GO:0070925)	10
GO_Biological_Process_2018	regulation of protein localization to nucleus (GO:1900180)	10
GO_Biological_Process_2018	negative regulation of ion transport (GO:0043271)	10
GO_Biological_Process_2018	signal peptide processing (GO:0006465)	10
GO_Biological_Process_2018	beta-catenin-TCF complex assembly (GO:1904837)	10
GO_Biological_Process_2018	negative regulation of ATP metabolic process (GO:1903579)	10
GO_Biological_Process_2018	ER to Golgi vesicle-mediated transport (GO:0006888)	10
GO_Biological_Process_2018	regulation of transmembrane transport (GO:0034762)	10
GO_Biological_Process_2018	regulation of endodeoxyribonuclease activity (GO:0032071)	10
GO_Biological_Process_2018	cellular copper ion homeostasis (GO:0006878)	10
GO_Biological_Process_2018	regulation of Notch signaling pathway (GO:0008593)	10
GO_Biological_Process_2018	pyruvate metabolic process (GO:0006090)	10
GO_Biological_Process_2018	regulation of adaptive immune response (GO:0002819)	10
GO_Biological_Process_2018	positive regulation of catalytic activity (GO:0043085)	10
GO_Biological_Process_2018	regulation of cellular pH (GO:0030641)	10
GO_Biological_Process_2018	nucleotide-excision repair, DNA incision, 5'-to lesion (GO:0006296)	10
GO_Biological_Process_2018	regulation of myeloid cell differentiation (GO:0045637)	10
GO_Biological_Process_2018	positive regulation of muscle cell differentiation (GO:0051149)	10
GO_Biological_Process_2018	cellular response to peptide (GO:1901653)	10
GO_Biological_Process_2018	response to lipoteichoic acid (GO:0070391)	10
GO_Biological_Process_2018	cellular response to lipoteichoic acid (GO:0071223)	10
GO_Biological_Process_2018	monovalent inorganic anion homeostasis (GO:0055083)	10
GO_Biological_Process_2018	positive regulation of protein kinase A signaling (GO:0010739)	10
GO_Biological_Process_2018	nucleoside metabolic process (GO:0009116)	10
GO_Biological_Process_2018	negative regulation of chemokine production (GO:0032682)	10
GO_Biological_Process_2018	negative regulation of macroautophagy (GO:0016242)	10
GO_Biological_Process_2018	sulfur amino acid metabolic process (GO:0000096)	10
GO_Biological_Process_2018	transcription initiation from RNA polymerase III promoter (GO:0006384)	10
GO_Biological_Process_2018	mitotic cell cycle phase transition (GO:0044772)	10
GO_Biological_Process_2018	positive regulation of endothelial cell proliferation (GO:0001938)	9
GO_Biological_Process_2018	amyloid precursor protein metabolic process (GO:0042982)	9
GO_Biological_Process_2018	negative regulation of neuron apoptotic process (GO:0043524)	9
GO_Biological_Process_2018	cell wall macromolecule catabolic process (GO:0016998)	9
GO_Biological_Process_2018	sensory perception of light stimulus (GO:0050953)	9
GO_Biological_Process_2018	mitotic nuclear envelope reassembly (GO:0007084)	9
GO_Biological_Process_2018	sodium ion transmembrane transport (GO:0035725)	9
GO_Biological_Process_2018	stress granule assembly (GO:0034063)	9
GO_Biological_Process_2018	detection of chemical stimulus involved in sensory perception (GO:0050907)	9
GO_Biological_Process_2018	L-alanine transport (GO:0015808)	9
GO_Biological_Process_2018	protein import into mitochondrial matrix (GO:0030150)	9
GO_Biological_Process_2018	monocyte activation (GO:0042117)	9
GO_Biological_Process_2018	hexose metabolic process (GO:0019318)	9
GO_Biological_Process_2018	monocarboxylic acid transport (GO:0015718)	9
GO_Biological_Process_2018	negative regulation of Wnt signaling pathway (GO:0030178)	9
GO_Biological_Process_2018	regulation of JAK-STAT cascade (GO:0046425)	9
GO_Biological_Process_2018	regulation of mitotic cell cycle phase transition (GO:1901990)	9
GO_Biological_Process_2018	protein localization to plasma membrane (GO:0072659)	9
GO_Biological_Process_2018	positive regulation of interleukin-1 secretion (GO:0050716)	9
GO_Biological_Process_2018	positive regulation of mononuclear cell migration (GO:0071677)	9
GO_Biological_Process_2018	DNA dealkylation involved in DNA repair (GO:0006307)	9
GO_Biological_Process_2018	DNA dealkylation (GO:0035510)	9
GO_Biological_Process_2018	positive regulation of response to external stimulus (GO:0032103)	9
GO_Biological_Process_2018	cellular response to virus (GO:0098586)	9
GO_Biological_Process_2018	regulation of pri-miRNA transcription from RNA polymerase II promoter (GO:1902893)	9
GO_Biological_Process_2018	interstrand cross-link repair (GO:0036297)	9
GO_Biological_Process_2018	membrane depolarization during action potential (GO:0086010)	9
GO_Biological_Process_2018	DNA repair (GO:0006281)	9
GO_Biological_Process_2018	ruffle organization (GO:0031529)	9
GO_Biological_Process_2018	negative regulation of lipid storage (GO:0010888)	9
GO_Biological_Process_2018	regulation of extracellular matrix organization (GO:1903053)	9
GO_Biological_Process_2018	tumor necrosis factor-mediated signaling pathway (GO:0033209)	9
GO_Biological_Process_2018	regulation of smooth muscle cell migration (GO:0014910)	9
GO_Biological_Process_2018	microtubule nucleation (GO:0007020)	9
GO_Biological_Process_2018	kinetochore organization (GO:0051383)	9
GO_Biological_Process_2018	L-serine metabolic process (GO:0006563)	9
GO_Biological_Process_2018	peptidyl-serine modification (GO:0018209)	9
GO_Biological_Process_2018	negative regulation of appetite (GO:0032099)	9
GO_Biological_Process_2018	regulation of phagocytosis (GO:0050764)	9
GO_Biological_Process_2018	positive regulation of myeloid leukocyte mediated immunity (GO:0002888)	9
GO_Biological_Process_2018	glycerolipid metabolic process (GO:0046486)	9
GO_Biological_Process_2018	regulation of interleukin-1 beta production (GO:0032651)	9
GO_Biological_Process_2018	peptide transport (GO:0015833)	9
GO_Biological_Process_2018	regulation of sodium ion transport (GO:0002028)	9
GO_Biological_Process_2018	organophosphate ester transport (GO:0015748)	9
GO_Biological_Process_2018	necroptotic process (GO:0070266)	9
GO_Biological_Process_2018	adaptive immune response based on somatic recombination of immune receptors built from immunoglobulin superfamily domains (GO:0002460)	9
GO_Biological_Process_2018	lytic vacuole organization (GO:0080171)	9
GO_Biological_Process_2018	cellular response to fibroblast growth factor stimulus (GO:0044344)	9
GO_Biological_Process_2018	tRNA aminoacylation for mitochondrial protein translation (GO:0070127)	9
GO_Biological_Process_2018	response to hydroperoxide (GO:0033194)	9
GO_Biological_Process_2018	positive regulation of viral entry into host cell (GO:0046598)	9
GO_Biological_Process_2018	negative regulation of cAMP-mediated signaling (GO:0043951)	9
GO_Biological_Process_2018	insulin-like growth factor receptor signaling pathway (GO:0048009)	9
GO_Biological_Process_2018	nuclear envelope organization (GO:0006998)	9
GO_Biological_Process_2018	regulation of cellular macromolecule biosynthetic process (GO:2000112)	8
GO_Biological_Process_2018	regulation of neuron apoptotic process (GO:0043523)	8
GO_Biological_Process_2018	stabilization of membrane potential (GO:0030322)	8
GO_Biological_Process_2018	negative regulation of response to external stimulus (GO:0032102)	8
GO_Biological_Process_2018	regulation of nitric-oxide synthase activity (GO:0050999)	8
GO_Biological_Process_2018	phospholipid efflux (GO:0033700)	8
GO_Biological_Process_2018	positive regulation of potassium ion transmembrane transporter activity (GO:1901018)	8
GO_Biological_Process_2018	positive regulation of ERAD pathway (GO:1904294)	8
GO_Biological_Process_2018	cyclic-nucleotide-mediated signaling (GO:0019935)	8
GO_Biological_Process_2018	exocyst localization (GO:0051601)	8
GO_Biological_Process_2018	positive regulation of potassium ion transmembrane transport (GO:1901381)	8
GO_Biological_Process_2018	negative regulation of cytokine production (GO:0001818)	8
GO_Biological_Process_2018	negative regulation of response to stimulus (GO:0048585)	8
GO_Biological_Process_2018	G-protein coupled acetylcholine receptor signaling pathway (GO:0007213)	8
GO_Biological_Process_2018	amino acid transport (GO:0006865)	8
GO_Biological_Process_2018	carboxylic acid transmembrane transport (GO:1905039)	8
GO_Biological_Process_2018	regulation of dephosphorylation (GO:0035303)	8
GO_Biological_Process_2018	ion transport (GO:0006811)	8
GO_Biological_Process_2018	extrinsic apoptotic signaling pathway (GO:0097191)	8
GO_Biological_Process_2018	response to interferon-alpha (GO:0035455)	8
GO_Biological_Process_2018	positive regulation of stem cell proliferation (GO:2000648)	8
GO_Biological_Process_2018	regulation of interleukin-4 production (GO:0032673)	8
GO_Biological_Process_2018	detection of bacterium (GO:0016045)	8
GO_Biological_Process_2018	negative regulation of ossification (GO:0030279)	8
GO_Biological_Process_2018	negative regulation of tyrosine phosphorylation of STAT protein (GO:0042532)	8
GO_Biological_Process_2018	response to alkaloid (GO:0043279)	8
GO_Biological_Process_2018	regulation of smooth muscle cell proliferation (GO:0048660)	8
GO_Biological_Process_2018	sensory perception (GO:0007600)	8
GO_Biological_Process_2018	positive regulation of cytoskeleton organization (GO:0051495)	8
GO_Biological_Process_2018	cell differentiation in hindbrain (GO:0021533)	8
GO_Biological_Process_2018	cytokine-mediated signaling pathway (GO:0019221)	8
GO_Biological_Process_2018	regulation of calcium ion-dependent exocytosis (GO:0017158)	8
GO_Biological_Process_2018	regulation of intrinsic apoptotic signaling pathway in response to DNA damage by p53 class mediator (GO:1902165)	8
GO_Biological_Process_2018	endodermal cell differentiation (GO:0035987)	8
GO_Biological_Process_2018	protein polyubiquitination (GO:0000209)	8
GO_Biological_Process_2018	protein dephosphorylation (GO:0006470)	8
GO_Biological_Process_2018	wound healing (GO:0042060)	8
GO_Biological_Process_2018	cellular response to low-density lipoprotein particle stimulus (GO:0071404)	8
GO_Biological_Process_2018	drug transport (GO:0015893)	8
GO_Biological_Process_2018	covalent chromatin modification (GO:0016569)	8
GO_Biological_Process_2018	response to estradiol (GO:0032355)	8
GO_Biological_Process_2018	positive regulation of transcription from RNA polymerase II promoter in response to endoplasmic reticulum stress (GO:1990440)	8
GO_Biological_Process_2018	regulation of T cell proliferation (GO:0042129)	8
GO_Biological_Process_2018	high-density lipoprotein particle remodeling (GO:0034375)	8
GO_Biological_Process_2018	reverse cholesterol transport (GO:0043691)	8
GO_Biological_Process_2018	potassium ion import (GO:0010107)	8
GO_Biological_Process_2018	potassium ion homeostasis (GO:0055075)	8
GO_Biological_Process_2018	epithelial cell differentiation (GO:0030855)	8
GO_Biological_Process_2018	regulation of organelle organization (GO:0033043)	8
GO_Biological_Process_2018	regulation of epithelial cell migration (GO:0010632)	8
GO_Biological_Process_2018	regulation of cholesterol homeostasis (GO:2000188)	8
GO_Biological_Process_2018	positive regulation of fatty acid metabolic process (GO:0045923)	8
GO_Biological_Process_2018	hexose transport (GO:0008645)	8
GO_Biological_Process_2018	regulation of memory T cell differentiation (GO:0043380)	8
GO_Biological_Process_2018	regulation of hydrogen peroxide metabolic process (GO:0010310)	8
GO_Biological_Process_2018	telomere organization (GO:0032200)	8
GO_Biological_Process_2018	positive regulation of fertilization (GO:1905516)	8
GO_Biological_Process_2018	TORC1 signaling (GO:0038202)	8
GO_Biological_Process_2018	prostanoid biosynthetic process (GO:0046457)	8
GO_Biological_Process_2018	defense response to Gram-positive bacterium (GO:0050830)	8
GO_Biological_Process_2018	membrane disruption in other organism (GO:0051673)	8
GO_Biological_Process_2018	positive regulation of phosphatase activity (GO:0010922)	8
GO_Biological_Process_2018	positive regulation of B cell differentiation (GO:0045579)	8
GO_Biological_Process_2018	pharyngeal system development (GO:0060037)	8
GO_Biological_Process_2018	peptidyl-serine dephosphorylation (GO:0070262)	8
GO_Biological_Process_2018	cell-substrate adherens junction assembly (GO:0007045)	8
GO_Biological_Process_2018	focal adhesion assembly (GO:0048041)	8
GO_Biological_Process_2018	regulation of telomere maintenance via telomerase (GO:0032210)	8
GO_Biological_Process_2018	regulation of actin filament depolymerization (GO:0030834)	8
GO_Biological_Process_2018	regulation of glucokinase activity (GO:0033131)	8
GO_Biological_Process_2018	regulation of calcium ion import (GO:0090279)	8
GO_Biological_Process_2018	proteolysis (GO:0006508)	8
GO_Biological_Process_2018	positive regulation of DNA biosynthetic process (GO:2000573)	8
GO_Biological_Process_2018	regulation of cardiac conduction (GO:1903779)	7
GO_Biological_Process_2018	positive regulation of epidermis development (GO:0045684)	7
GO_Biological_Process_2018	myelination (GO:0042552)	7
GO_Biological_Process_2018	regulation of mRNA 3'-end processing (GO:0031440)	7
GO_Biological_Process_2018	negative regulation of protein tyrosine kinase activity (GO:0061099)	7
GO_Biological_Process_2018	negative regulation of sequence-specific DNA binding transcription factor activity (GO:0043433)	7
GO_Biological_Process_2018	positive regulation of lymphocyte migration (GO:2000403)	7
GO_Biological_Process_2018	protein trimerization (GO:0070206)	7
GO_Biological_Process_2018	nuclear envelope reassembly (GO:0031468)	7
GO_Biological_Process_2018	synaptic vesicle recycling (GO:0036465)	7
GO_Biological_Process_2018	galactosylceramide metabolic process (GO:0006681)	7
GO_Biological_Process_2018	positive regulation of humoral immune response (GO:0002922)	7
GO_Biological_Process_2018	citrate metabolic process (GO:0006101)	7
GO_Biological_Process_2018	relaxation of cardiac muscle (GO:0055119)	7
GO_Biological_Process_2018	dendritic cell differentiation (GO:0097028)	7
GO_Biological_Process_2018	chemical homeostasis (GO:0048878)	7
GO_Biological_Process_2018	defense response to fungus (GO:0050832)	7
GO_Biological_Process_2018	positive regulation of transcription from RNA polymerase II promoter (GO:0045944)	7
GO_Biological_Process_2018	anion transport (GO:0006820)	7
GO_Biological_Process_2018	vesicle-mediated transport in synapse (GO:0099003)	7
GO_Biological_Process_2018	calcium ion import into cytosol (GO:1902656)	7
GO_Biological_Process_2018	calcium ion import across plasma membrane (GO:0098703)	7
GO_Biological_Process_2018	outflow tract septum morphogenesis (GO:0003148)	7
GO_Biological_Process_2018	striated muscle cell development (GO:0055002)	7
GO_Biological_Process_2018	negative regulation of angiogenesis (GO:0016525)	7
GO_Biological_Process_2018	beta-catenin destruction complex disassembly (GO:1904886)	7
GO_Biological_Process_2018	positive regulation of cell migration (GO:0030335)	7
GO_Biological_Process_2018	regulation of branching involved in ureteric bud morphogenesis (GO:0090189)	7
GO_Biological_Process_2018	positive regulation of axonogenesis (GO:0050772)	7
GO_Biological_Process_2018	positive regulation of morphogenesis of an epithelium (GO:1905332)	7
GO_Biological_Process_2018	sulfur compound biosynthetic process (GO:0044272)	7
GO_Biological_Process_2018	positive regulation of protein import into nucleus (GO:0042307)	7
GO_Biological_Process_2018	heart contraction (GO:0060047)	7
GO_Biological_Process_2018	nucleotide-excision repair, preincision complex assembly (GO:0006294)	7
GO_Biological_Process_2018	response to nutrient levels (GO:0031667)	7
GO_Biological_Process_2018	sterol metabolic process (GO:0016125)	7
GO_Biological_Process_2018	nucleocytoplasmic transport (GO:0006913)	7
GO_Biological_Process_2018	mRNA-containing ribonucleoprotein complex export from nucleus (GO:0071427)	7
GO_Biological_Process_2018	oogenesis (GO:0048477)	7
GO_Biological_Process_2018	cytoplasmic mRNA processing body assembly (GO:0033962)	7
GO_Biological_Process_2018	cellular monovalent inorganic cation homeostasis (GO:0030004)	7
GO_Biological_Process_2018	negative regulation of cell cycle (GO:0045786)	7
GO_Biological_Process_2018	stem cell differentiation (GO:0048863)	7
GO_Biological_Process_2018	positive regulation of angiogenesis (GO:0045766)	7
GO_Biological_Process_2018	heart development (GO:0007507)	7
GO_Biological_Process_2018	positive regulation of stem cell differentiation (GO:2000738)	7
GO_Biological_Process_2018	regulation of interleukin-1 beta secretion (GO:0050706)	7
GO_Biological_Process_2018	cytochrome complex assembly (GO:0017004)	7
GO_Biological_Process_2018	intracellular steroid hormone receptor signaling pathway (GO:0030518)	7
GO_Biological_Process_2018	positive regulation of DNA replication (GO:0045740)	7
GO_Biological_Process_2018	glucose homeostasis (GO:0042593)	7
GO_Biological_Process_2018	establishment of protein localization to mitochondrial membrane (GO:0090151)	7
GO_Biological_Process_2018	regulation of muscle system process (GO:0090257)	7
GO_Biological_Process_2018	monosaccharide transport (GO:0015749)	7
GO_Biological_Process_2018	cellular response to mechanical stimulus (GO:0071260)	7
GO_Biological_Process_2018	regulation of double-strand break repair (GO:2000779)	7
GO_Biological_Process_2018	innate immune response in mucosa (GO:0002227)	7
GO_Biological_Process_2018	positive regulation of cholesterol storage (GO:0010886)	7
GO_Biological_Process_2018	regulation of protein modification process (GO:0031399)	7
GO_Biological_Process_2018	positive regulation of mitotic cell cycle phase transition (GO:1901992)	7
GO_Biological_Process_2018	tRNA aminoacylation for protein translation (GO:0006418)	7
GO_Biological_Process_2018	cardiac right ventricle morphogenesis (GO:0003215)	7
GO_Biological_Process_2018	bone development (GO:0060348)	7
GO_Biological_Process_2018	positive regulation by host of viral transcription (GO:0043923)	7
GO_Biological_Process_2018	negative regulation of leukocyte activation (GO:0002695)	7
GO_Biological_Process_2018	positive regulation of TOR signaling (GO:0032008)	7
GO_Biological_Process_2018	smooth muscle cell differentiation (GO:0051145)	7
GO_Biological_Process_2018	cellular response to glucose starvation (GO:0042149)	7
GO_Biological_Process_2018	DNA replication (GO:0006260)	7
GO_Biological_Process_2018	regulation of lipid biosynthetic process (GO:0046890)	7
GO_Biological_Process_2018	mRNA transcription from RNA polymerase II promoter (GO:0042789)	6
GO_Biological_Process_2018	negative regulation of NF-kappaB transcription factor activity (GO:0032088)	6
GO_Biological_Process_2018	regulation of neuron death (GO:1901214)	6
GO_Biological_Process_2018	negative regulation of growth (GO:0045926)	6
GO_Biological_Process_2018	DNA-templated transcription, initiation (GO:0006352)	6
GO_Biological_Process_2018	regulation of spindle assembly (GO:0090169)	6
GO_Biological_Process_2018	cytoskeleton-dependent intracellular transport (GO:0030705)	6
GO_Biological_Process_2018	regulation of blood vessel diameter (GO:0097746)	6
GO_Biological_Process_2018	positive regulation of glycoprotein biosynthetic process (GO:0010560)	6
GO_Biological_Process_2018	immunological synapse formation (GO:0001771)	6
GO_Biological_Process_2018	negative regulation of cellular macromolecule biosynthetic process (GO:2000113)	6
GO_Biological_Process_2018	platelet degranulation (GO:0002576)	6
GO_Biological_Process_2018	positive regulation of T-helper 2 cell differentiation (GO:0045630)	6
GO_Biological_Process_2018	T-helper 17 cell lineage commitment (GO:0072540)	6
GO_Biological_Process_2018	cardiac muscle contraction (GO:0060048)	6
GO_Biological_Process_2018	protein localization to membrane (GO:0072657)	6
GO_Biological_Process_2018	low-density lipoprotein particle remodeling (GO:0034374)	6
GO_Biological_Process_2018	toll-like receptor signaling pathway (GO:0002224)	6
GO_Biological_Process_2018	cell migration involved in heart development (GO:0060973)	6
GO_Biological_Process_2018	negative regulation of DNA repair (GO:0045738)	6
GO_Biological_Process_2018	positive regulation of intracellular estrogen receptor signaling pathway (GO:0033148)	6
GO_Biological_Process_2018	negative regulation of multicellular organismal process (GO:0051241)	6
GO_Biological_Process_2018	cellular response to acid chemical (GO:0071229)	6
GO_Biological_Process_2018	positive regulation of interleukin-10 production (GO:0032733)	6
GO_Biological_Process_2018	positive regulation of protein exit from endoplasmic reticulum (GO:0070863)	6
GO_Biological_Process_2018	regulation of interleukin-10 production (GO:0032653)	6
GO_Biological_Process_2018	negative regulation of leukocyte apoptotic process (GO:2000107)	6
GO_Biological_Process_2018	regulation of JNK cascade (GO:0046328)	6
GO_Biological_Process_2018	nose development (GO:0043584)	6
GO_Biological_Process_2018	lysosome localization (GO:0032418)	6
GO_Biological_Process_2018	positive regulation of autophagosome maturation (GO:1901098)	6
GO_Biological_Process_2018	positive regulation of acrosome reaction (GO:2000344)	6
GO_Biological_Process_2018	multivesicular body assembly (GO:0036258)	6
GO_Biological_Process_2018	regulation of autophagosome maturation (GO:1901096)	6
GO_Biological_Process_2018	positive regulation of leukocyte chemotaxis (GO:0002690)	6
GO_Biological_Process_2018	organic cation transport (GO:0015695)	6
GO_Biological_Process_2018	nucleus organization (GO:0006997)	6
GO_Biological_Process_2018	negative regulation of mitotic nuclear division (GO:0045839)	6
GO_Biological_Process_2018	DNA recombination (GO:0006310)	6
GO_Biological_Process_2018	negative regulation of interleukin-12 production (GO:0032695)	6
GO_Biological_Process_2018	positive regulation of macromolecule biosynthetic process (GO:0010557)	6
GO_Biological_Process_2018	positive regulation of cellular catabolic process (GO:0031331)	6
GO_Biological_Process_2018	microtubule polymerization (GO:0046785)	6
GO_Biological_Process_2018	protein localization to nucleus (GO:0034504)	6
GO_Biological_Process_2018	respiratory chain complex IV assembly (GO:0008535)	6
GO_Biological_Process_2018	cellular response to nitrogen starvation (GO:0006995)	6
GO_Biological_Process_2018	cellular response to nitrogen levels (GO:0043562)	6
GO_Biological_Process_2018	negative regulation of cell division (GO:0051782)	6
GO_Biological_Process_2018	negative regulation of transmembrane receptor protein serine/threonine kinase signaling pathway (GO:0090101)	6
GO_Biological_Process_2018	secondary alcohol metabolic process (GO:1902652)	6
GO_Biological_Process_2018	fructose 1,6-bisphosphate metabolic process (GO:0030388)	6
GO_Biological_Process_2018	negative regulation of vasculature development (GO:1901343)	6
GO_Biological_Process_2018	phosphatidylglycerol acyl-chain remodeling (GO:0036148)	6
GO_Biological_Process_2018	positive regulation of catabolic process (GO:0009896)	6
GO_Biological_Process_2018	methylation-dependent chromatin silencing (GO:0006346)	6
GO_Biological_Process_2018	cAMP-mediated signaling (GO:0019933)	6
GO_Biological_Process_2018	intracellular estrogen receptor signaling pathway (GO:0030520)	6
GO_Biological_Process_2018	high-density lipoprotein particle assembly (GO:0034380)	6
GO_Biological_Process_2018	detection of chemical stimulus involved in sensory perception of smell (GO:0050911)	6
GO_Biological_Process_2018	peptidyl-serine phosphorylation (GO:0018105)	6
GO_Biological_Process_2018	chaperone-mediated protein transport (GO:0072321)	6
GO_Biological_Process_2018	cell morphogenesis involved in differentiation (GO:0000904)	6
GO_Biological_Process_2018	neurotransmitter transport (GO:0006836)	6
GO_Biological_Process_2018	termination of RNA polymerase II transcription (GO:0006369)	6
GO_Biological_Process_2018	negative regulation of GTPase activity (GO:0034260)	6
GO_Biological_Process_2018	positive regulation of intracellular transport (GO:0032388)	6
GO_Biological_Process_2018	regulation of stem cell proliferation (GO:0072091)	6
GO_Biological_Process_2018	negative regulation of interleukin-17 production (GO:0032700)	6
GO_Biological_Process_2018	regulation of mitotic metaphase/anaphase transition (GO:0030071)	6
GO_Biological_Process_2018	regulation of cytoplasmic transport (GO:1903649)	6
GO_Biological_Process_2018	DNA replication checkpoint (GO:0000076)	6
GO_Biological_Process_2018	protein methylation (GO:0006479)	6
GO_Biological_Process_2018	regulation of protein catabolic process (GO:0042176)	6
GO_Biological_Process_2018	positive regulation of dephosphorylation (GO:0035306)	6
GO_Biological_Process_2018	ionotropic glutamate receptor signaling pathway (GO:0035235)	6
GO_Biological_Process_2018	positive regulation of cysteine-type endopeptidase activity (GO:2001056)	6
GO_Biological_Process_2018	positive regulation of lymphocyte differentiation (GO:0045621)	6
GO_Biological_Process_2018	Notch signaling pathway (GO:0007219)	6
GO_Biological_Process_2018	mRNA 3'-splice site recognition (GO:0000389)	6
GO_Biological_Process_2018	regulation of programmed cell death (GO:0043067)	6
GO_Biological_Process_2018	cellular response to glucocorticoid stimulus (GO:0071385)	6
GO_Biological_Process_2018	positive regulation of cell cycle G1/S phase transition (GO:1902808)	6
GO_Biological_Process_2018	regulation of cell aging (GO:0090342)	6
GO_Biological_Process_2018	atrial septum development (GO:0003283)	6
GO_Biological_Process_2018	positive regulation by host of viral process (GO:0044794)	6
GO_Biological_Process_2018	nucleotide-excision repair, DNA incision (GO:0033683)	6
GO_Biological_Process_2018	positive regulation of lipid storage (GO:0010884)	6
GO_Biological_Process_2018	apoptotic process (GO:0006915)	6
GO_Biological_Process_2018	regulation of delayed rectifier potassium channel activity (GO:1902259)	6
GO_Biological_Process_2018	regulation of macrophage activation (GO:0043030)	6
GO_Biological_Process_2018	positive regulation of transcription of Notch receptor target (GO:0007221)	6
GO_Biological_Process_2018	establishment of protein localization to organelle (GO:0072594)	6
GO_Biological_Process_2018	autophagosome maturation (GO:0097352)	6
GO_Biological_Process_2018	regulation of platelet-derived growth factor receptor-beta signaling pathway (GO:2000586)	6
GO_Biological_Process_2018	RNA metabolic process (GO:0016070)	6
GO_Biological_Process_2018	positive regulation of calcium ion transmembrane transport (GO:1904427)	6
GO_Biological_Process_2018	growth hormone receptor signaling pathway (GO:0060396)	6
GO_Biological_Process_2018	regulation of Wnt signaling pathway (GO:0030111)	6
GO_Biological_Process_2018	positive regulation of epidermal cell differentiation (GO:0045606)	5
GO_Biological_Process_2018	positive regulation of regulatory T cell differentiation (GO:0045591)	5
GO_Biological_Process_2018	response to metal ion (GO:0010038)	5
GO_Biological_Process_2018	regulation of heart contraction (GO:0008016)	5
GO_Biological_Process_2018	regulation of G-protein coupled receptor protein signaling pathway (GO:0008277)	5
GO_Biological_Process_2018	mRNA transcription (GO:0009299)	5
GO_Biological_Process_2018	positive regulation of protein binding (GO:0032092)	5
GO_Biological_Process_2018	peptidyl-proline hydroxylation (GO:0019511)	5
[truncated: 1,942 more rows]

## Sheet: GO Molecular Function
Database	Enriched term	Number of CTCs
GO_Molecular_Function_2018	RAGE receptor binding (GO:0050786)	61
GO_Molecular_Function_2018	calcium ion binding (GO:0005509)	56
GO_Molecular_Function_2018	metal ion binding (GO:0046872)	55
GO_Molecular_Function_2018	RNA binding (GO:0003723)	50
GO_Molecular_Function_2018	adenylyltransferase activity (GO:0070566)	47
GO_Molecular_Function_2018	ephrin receptor binding (GO:0046875)	47
GO_Molecular_Function_2018	purine ribonucleoside triphosphate binding (GO:0035639)	43
GO_Molecular_Function_2018	serine-type endopeptidase inhibitor activity (GO:0004867)	39
GO_Molecular_Function_2018	L-proline transmembrane transporter activity (GO:0015193)	39
GO_Molecular_Function_2018	fatty-acyl-CoA synthase activity (GO:0004321)	39
GO_Molecular_Function_2018	cysteine-type endopeptidase inhibitor activity (GO:0004869)	38
GO_Molecular_Function_2018	acyl-CoA ligase activity (GO:0003996)	38
GO_Molecular_Function_2018	CoA-ligase activity (GO:0016405)	38
GO_Molecular_Function_2018	ATP-dependent RNA helicase activity (GO:0004004)	38
GO_Molecular_Function_2018	leucine zipper domain binding (GO:0043522)	38
GO_Molecular_Function_2018	water transmembrane transporter activity (GO:0005372)	37
GO_Molecular_Function_2018	water channel activity (GO:0015250)	37
GO_Molecular_Function_2018	transcription coactivator activity (GO:0003713)	37
GO_Molecular_Function_2018	MHC class II protein binding (GO:0042289)	37
GO_Molecular_Function_2018	salt transmembrane transporter activity (GO:1901702)	37
GO_Molecular_Function_2018	urate transmembrane transporter activity (GO:0015143)	37
GO_Molecular_Function_2018	inorganic anion transmembrane transporter activity (GO:0015103)	37
GO_Molecular_Function_2018	sodium-independent organic anion transmembrane transporter activity (GO:0015347)	37
GO_Molecular_Function_2018	RNA-dependent ATPase activity (GO:0008186)	37
GO_Molecular_Function_2018	acid-thiol ligase activity (GO:0016878)	37
GO_Molecular_Function_2018	C-acyltransferase activity (GO:0016408)	36
GO_Molecular_Function_2018	neurotrophin TRKA receptor binding (GO:0005168)	36
GO_Molecular_Function_2018	ATP binding (GO:0005524)	35
GO_Molecular_Function_2018	purinergic receptor activity (GO:0035586)	35
GO_Molecular_Function_2018	sulfurtransferase activity (GO:0016783)	35
GO_Molecular_Function_2018	syntaxin binding (GO:0019905)	32
GO_Molecular_Function_2018	CCR chemokine receptor binding (GO:0048020)	32
GO_Molecular_Function_2018	cation:amino acid symporter activity (GO:0005416)	32
GO_Molecular_Function_2018	organic anion transmembrane transporter activity (GO:0008514)	32
GO_Molecular_Function_2018	RNA helicase activity (GO:0003724)	32
GO_Molecular_Function_2018	anion transmembrane transporter activity (GO:0008509)	31
GO_Molecular_Function_2018	transcription factor activity, RNA polymerase II core promoter proximal region sequence-specific binding (GO:0000982)	31
GO_Molecular_Function_2018	ATP-dependent helicase activity (GO:0008026)	31
GO_Molecular_Function_2018	bitter taste receptor activity (GO:0033038)	30
GO_Molecular_Function_2018	transcriptional repressor activity, RNA polymerase II core promoter proximal region sequence-specific binding (GO:0001078)	30
GO_Molecular_Function_2018	solute:proton symporter activity (GO:0015295)	30
GO_Molecular_Function_2018	taste receptor activity (GO:0008527)	29
GO_Molecular_Function_2018	hydrogen:amino acid symporter activity (GO:0005280)	29
GO_Molecular_Function_2018	sterol binding (GO:0032934)	28
GO_Molecular_Function_2018	phosphatidylinositol transporter activity (GO:0008526)	28
GO_Molecular_Function_2018	neurotrophin TRK receptor binding (GO:0005167)	28
GO_Molecular_Function_2018	mitogen-activated protein kinase binding (GO:0051019)	27
GO_Molecular_Function_2018	chemokine activity (GO:0008009)	27
GO_Molecular_Function_2018	endopeptidase inhibitor activity (GO:0004866)	27
GO_Molecular_Function_2018	RNA polymerase II regulatory region sequence-specific DNA binding (GO:0000977)	27
GO_Molecular_Function_2018	phosphatase binding (GO:0019902)	27
GO_Molecular_Function_2018	phosphatidylinositol phosphate binding (GO:1901981)	27
GO_Molecular_Function_2018	phosphatidylinositol-3,4,5-trisphosphate binding (GO:0005547)	26
GO_Molecular_Function_2018	protein channel activity (GO:0015266)	26
GO_Molecular_Function_2018	chemokine receptor binding (GO:0042379)	26
GO_Molecular_Function_2018	protein homodimerization activity (GO:0042803)	26
GO_Molecular_Function_2018	histone methyltransferase activity (H3-K36 specific) (GO:0046975)	25
GO_Molecular_Function_2018	GTPase activator activity (GO:0005096)	25
GO_Molecular_Function_2018	carboxylic acid transmembrane transporter activity (GO:0046943)	25
GO_Molecular_Function_2018	inositol trisphosphate kinase activity (GO:0051766)	24
GO_Molecular_Function_2018	histone methyltransferase activity (H3-K4 specific) (GO:0042800)	24
GO_Molecular_Function_2018	tropomyosin binding (GO:0005523)	23
GO_Molecular_Function_2018	motor activity (GO:0003774)	23
GO_Molecular_Function_2018	Ras GTPase binding (GO:0017016)	23
GO_Molecular_Function_2018	phosphatidylinositol-4,5-bisphosphate binding (GO:0005546)	23
GO_Molecular_Function_2018	frizzled binding (GO:0005109)	22
GO_Molecular_Function_2018	adenyl ribonucleotide binding (GO:0032559)	22
GO_Molecular_Function_2018	phosphatidylcholine 1-acylhydrolase activity (GO:0008970)	22
GO_Molecular_Function_2018	monoamine transmembrane transporter activity (GO:0008504)	22
GO_Molecular_Function_2018	protease binding (GO:0002020)	21
GO_Molecular_Function_2018	secondary active transmembrane transporter activity (GO:0015291)	21
GO_Molecular_Function_2018	zinc ion binding (GO:0008270)	21
GO_Molecular_Function_2018	galanin receptor activity (GO:0004966)	21
GO_Molecular_Function_2018	calcium channel activity (GO:0005262)	21
GO_Molecular_Function_2018	Rab GTPase binding (GO:0017137)	21
GO_Molecular_Function_2018	extracellular ATP-gated cation channel activity (GO:0004931)	21
GO_Molecular_Function_2018	ATP-gated ion channel activity (GO:0035381)	21
GO_Molecular_Function_2018	nucleotide receptor activity (GO:0016502)	21
GO_Molecular_Function_2018	phosphoprotein phosphatase activity (GO:0004721)	21
GO_Molecular_Function_2018	dopamine transmembrane transporter activity (GO:0005329)	21
GO_Molecular_Function_2018	flap endonuclease activity (GO:0048256)	21
GO_Molecular_Function_2018	insulin-like growth factor receptor binding (GO:0005159)	21
GO_Molecular_Function_2018	cadherin binding (GO:0045296)	21
GO_Molecular_Function_2018	WW domain binding (GO:0050699)	21
GO_Molecular_Function_2018	hydrogen ion transmembrane transporter activity (GO:0015078)	21
GO_Molecular_Function_2018	channel activity (GO:0015267)	20
GO_Molecular_Function_2018	kinase inhibitor activity (GO:0019210)	20
GO_Molecular_Function_2018	protein tyrosine/serine/threonine phosphatase activity (GO:0008138)	20
GO_Molecular_Function_2018	RNA polymerase II core promoter proximal region sequence-specific DNA binding (GO:0000978)	20
GO_Molecular_Function_2018	phosphatidylcholine-sterol O-acyltransferase activator activity (GO:0060228)	20
GO_Molecular_Function_2018	kinase binding (GO:0019900)	20
GO_Molecular_Function_2018	microfilament motor activity (GO:0000146)	19
GO_Molecular_Function_2018	protein-disulfide reductase activity (GO:0047134)	19
GO_Molecular_Function_2018	oxidoreductase activity, acting on a sulfur group of donors, NAD(P) as acceptor (GO:0016668)	19
GO_Molecular_Function_2018	protein kinase inhibitor activity (GO:0004860)	19
GO_Molecular_Function_2018	transcription factor activity, RNA polymerase II distal enhancer sequence-specific binding (GO:0003705)	19
GO_Molecular_Function_2018	actin filament binding (GO:0051015)	18
GO_Molecular_Function_2018	CARD domain binding (GO:0050700)	18
GO_Molecular_Function_2018	neurotrophin binding (GO:0043121)	18
GO_Molecular_Function_2018	lipoprotein particle binding (GO:0071813)	18
GO_Molecular_Function_2018	U3 snoRNA binding (GO:0034511)	18
GO_Molecular_Function_2018	microtubule motor activity (GO:0003777)	18
GO_Molecular_Function_2018	cation channel activity (GO:0005261)	18
GO_Molecular_Function_2018	palmitoyl-CoA hydrolase activity (GO:0016290)	18
GO_Molecular_Function_2018	protein phosphatase binding (GO:0019903)	17
GO_Molecular_Function_2018	protein serine/threonine kinase activator activity (GO:0043539)	17
GO_Molecular_Function_2018	calmodulin-dependent protein kinase activity (GO:0004683)	17
GO_Molecular_Function_2018	endonuclease activity (GO:0004519)	17
GO_Molecular_Function_2018	triglyceride lipase activity (GO:0004806)	17
GO_Molecular_Function_2018	interleukin-17 receptor activity (GO:0030368)	17
GO_Molecular_Function_2018	low-density lipoprotein particle binding (GO:0030169)	17
GO_Molecular_Function_2018	endoribonuclease activity (GO:0004521)	17
GO_Molecular_Function_2018	quaternary ammonium group transmembrane transporter activity (GO:0015651)	17
GO_Molecular_Function_2018	ADP-ribosylation factor binding (GO:0030306)	17
GO_Molecular_Function_2018	sterol transporter activity (GO:0015248)	17
GO_Molecular_Function_2018	ATPase binding (GO:0051117)	16
GO_Molecular_Function_2018	transition metal ion binding (GO:0046914)	16
GO_Molecular_Function_2018	ubiquitin protein ligase binding (GO:0031625)	16
GO_Molecular_Function_2018	protein heterodimerization activity (GO:0046982)	16
GO_Molecular_Function_2018	ribonuclease activity (GO:0004540)	16
GO_Molecular_Function_2018	metalloendopeptidase activity (GO:0004222)	16
GO_Molecular_Function_2018	nuclease activity (GO:0004518)	16
GO_Molecular_Function_2018	voltage-gated calcium channel activity (GO:0005245)	16
GO_Molecular_Function_2018	hexosaminidase activity (GO:0015929)	16
GO_Molecular_Function_2018	aldehyde-lyase activity (GO:0016832)	16
GO_Molecular_Function_2018	four-way junction DNA binding (GO:0000400)	16
GO_Molecular_Function_2018	phospholipase C activity (GO:0004629)	16
GO_Molecular_Function_2018	aminoacyl-tRNA ligase activity (GO:0004812)	16
GO_Molecular_Function_2018	metal ion transmembrane transporter activity (GO:0046873)	16
GO_Molecular_Function_2018	transcription regulatory region DNA binding (GO:0044212)	16
GO_Molecular_Function_2018	telomerase RNA binding (GO:0070034)	16
GO_Molecular_Function_2018	sterol esterase activity (GO:0004771)	15
GO_Molecular_Function_2018	olfactory receptor activity (GO:0004984)	15
GO_Molecular_Function_2018	sodium ion binding (GO:0031402)	15
GO_Molecular_Function_2018	caspase binding (GO:0089720)	15
GO_Molecular_Function_2018	core promoter proximal region sequence-specific DNA binding (GO:0000987)	15
GO_Molecular_Function_2018	GTPase regulator activity (GO:0030695)	15
GO_Molecular_Function_2018	DNA polymerase binding (GO:0070182)	15
GO_Molecular_Function_2018	actin binding (GO:0003779)	15
GO_Molecular_Function_2018	cation transmembrane transporter activity (GO:0008324)	15
GO_Molecular_Function_2018	phosphatidic acid transporter activity (GO:1990050)	15
GO_Molecular_Function_2018	RNA polymerase II transcription factor activity, sequence-specific transcription regulatory region DNA binding (GO:0001133)	14
GO_Molecular_Function_2018	ion antiporter activity (GO:0099516)	14
GO_Molecular_Function_2018	amide transmembrane transporter activity (GO:0042887)	14
GO_Molecular_Function_2018	cholesterol binding (GO:0015485)	14
GO_Molecular_Function_2018	tRNA-specific ribonuclease activity (GO:0004549)	14
GO_Molecular_Function_2018	acetylcholine receptor activity (GO:0015464)	14
GO_Molecular_Function_2018	calcium-dependent phospholipase A2 activity (GO:0047498)	14
GO_Molecular_Function_2018	protein transmembrane transporter activity (GO:0008320)	14
GO_Molecular_Function_2018	single-stranded DNA exodeoxyribonuclease activity (GO:0008297)	14
GO_Molecular_Function_2018	nucleosomal DNA binding (GO:0031492)	14
GO_Molecular_Function_2018	acyl-CoA hydrolase activity (GO:0047617)	13
GO_Molecular_Function_2018	peptidyl-proline dioxygenase activity (GO:0031543)	13
GO_Molecular_Function_2018	calcium-dependent phospholipid binding (GO:0005544)	13
GO_Molecular_Function_2018	protein phosphatase 2A binding (GO:0051721)	13
GO_Molecular_Function_2018	RNA polymerase II repressing transcription factor binding (GO:0001103)	13
GO_Molecular_Function_2018	semaphorin receptor binding (GO:0030215)	13
GO_Molecular_Function_2018	G-protein coupled peptide receptor activity (GO:0008528)	13
GO_Molecular_Function_2018	death domain binding (GO:0070513)	13
GO_Molecular_Function_2018	calcium-dependent protein kinase activity (GO:0010857)	13
GO_Molecular_Function_2018	ubiquitin-like protein ligase binding (GO:0044389)	12
GO_Molecular_Function_2018	inorganic anion exchanger activity (GO:0005452)	12
GO_Molecular_Function_2018	pre-mRNA binding (GO:0036002)	12
GO_Molecular_Function_2018	ion channel activity (GO:0005216)	12
GO_Molecular_Function_2018	urea transmembrane transporter activity (GO:0015204)	12
GO_Molecular_Function_2018	substrate-specific channel activity (GO:0022838)	12
GO_Molecular_Function_2018	glucose:sodium symporter activity (GO:0005412)	12
GO_Molecular_Function_2018	LRR domain binding (GO:0030275)	12
GO_Molecular_Function_2018	1-phosphatidylinositol-3-kinase activity (GO:0016303)	12
GO_Molecular_Function_2018	sequence-specific DNA binding (GO:0043565)	11
GO_Molecular_Function_2018	calcium-dependent protein serine/threonine kinase activity (GO:0009931)	11
GO_Molecular_Function_2018	P-P-bond-hydrolysis-driven transmembrane transporter activity (GO:0015405)	11
GO_Molecular_Function_2018	ATPase activity, coupled to movement of substances (GO:0043492)	11
GO_Molecular_Function_2018	DNA secondary structure binding (GO:0000217)	11
GO_Molecular_Function_2018	R-SMAD binding (GO:0070412)	11
GO_Molecular_Function_2018	cytokine receptor binding (GO:0005126)	11
GO_Molecular_Function_2018	G-protein coupled chemoattractant receptor activity (GO:0001637)	11
GO_Molecular_Function_2018	protein kinase binding (GO:0019901)	11
GO_Molecular_Function_2018	GTP binding (GO:0005525)	11
GO_Molecular_Function_2018	interleukin-6 receptor binding (GO:0005138)	11
GO_Molecular_Function_2018	titin binding (GO:0031432)	10
GO_Molecular_Function_2018	organic acid transmembrane transporter activity (GO:0005342)	10
GO_Molecular_Function_2018	calcium ion transmembrane transporter activity (GO:0015085)	10
GO_Molecular_Function_2018	purine ribonucleoside binding (GO:0032550)	10
GO_Molecular_Function_2018	gamma-tubulin binding (GO:0043015)	10
GO_Molecular_Function_2018	protein serine/threonine kinase activity (GO:0004674)	10
GO_Molecular_Function_2018	transcriptional repressor activity, RNA polymerase II transcription regulatory region sequence-specific binding (GO:0001227)	10
GO_Molecular_Function_2018	collagen binding (GO:0005518)	10
GO_Molecular_Function_2018	phospholipase A2 activity (GO:0004623)	10
GO_Molecular_Function_2018	phosphatidylinositol kinase activity (GO:0052742)	10
GO_Molecular_Function_2018	proton-transporting ATP synthase activity, rotational mechanism (GO:0046933)	10
GO_Molecular_Function_2018	aminopeptidase activity (GO:0004177)	10
GO_Molecular_Function_2018	peptidyl-proline 4-dioxygenase activity (GO:0031545)	9
GO_Molecular_Function_2018	alanine transmembrane transporter activity (GO:0022858)	9
GO_Molecular_Function_2018	L-alanine transmembrane transporter activity (GO:0015180)	9
GO_Molecular_Function_2018	microtubule binding (GO:0008017)	9
GO_Molecular_Function_2018	phosphatidylinositol bisphosphate binding (GO:1902936)	9
GO_Molecular_Function_2018	metallopeptidase activity (GO:0008237)	9
GO_Molecular_Function_2018	intermediate filament binding (GO:0019215)	8
GO_Molecular_Function_2018	ATPase regulator activity (GO:0060590)	8
GO_Molecular_Function_2018	ubiquitin conjugating enzyme activity (GO:0061631)	8
GO_Molecular_Function_2018	arylsulfatase activity (GO:0004065)	8
GO_Molecular_Function_2018	sulfuric ester hydrolase activity (GO:0008484)	8
GO_Molecular_Function_2018	O-acyltransferase activity (GO:0008374)	8
GO_Molecular_Function_2018	endodeoxyribonuclease activity (GO:0004520)	8
GO_Molecular_Function_2018	core promoter sequence-specific DNA binding (GO:0001046)	8
GO_Molecular_Function_2018	leak channel activity (GO:0022840)	8
GO_Molecular_Function_2018	potassium ion leak channel activity (GO:0022841)	8
GO_Molecular_Function_2018	death receptor activity (GO:0005035)	8
GO_Molecular_Function_2018	tumor necrosis factor-activated receptor activity (GO:0005031)	8
GO_Molecular_Function_2018	phosphatidylinositol phospholipase C activity (GO:0004435)	8
GO_Molecular_Function_2018	phosphatidylinositol-5-phosphate binding (GO:0010314)	8
GO_Molecular_Function_2018	ATP-dependent DNA helicase activity (GO:0004003)	8
GO_Molecular_Function_2018	phosphatidylethanolamine binding (GO:0008429)	8
GO_Molecular_Function_2018	retinoic acid receptor binding (GO:0042974)	7
GO_Molecular_Function_2018	adenyl nucleotide binding (GO:0030554)	7
GO_Molecular_Function_2018	adenyl-nucleotide exchange factor activity (GO:0000774)	7
GO_Molecular_Function_2018	ligand-gated sodium channel activity (GO:0015280)	7
GO_Molecular_Function_2018	disulfide oxidoreductase activity (GO:0015036)	7
GO_Molecular_Function_2018	protein serine/threonine phosphatase activity (GO:0004722)	7
GO_Molecular_Function_2018	monovalent inorganic cation transmembrane transporter activity (GO:0015077)	7
GO_Molecular_Function_2018	aspartic-type peptidase activity (GO:0070001)	7
GO_Molecular_Function_2018	microtubule minus-end binding (GO:0051011)	7
GO_Molecular_Function_2018	divalent inorganic cation transmembrane transporter activity (GO:0072509)	7
GO_Molecular_Function_2018	crossover junction endodeoxyribonuclease activity (GO:0008821)	7
GO_Molecular_Function_2018	copper ion binding (GO:0005507)	7
GO_Molecular_Function_2018	bHLH transcription factor binding (GO:0043425)	7
GO_Molecular_Function_2018	RNA polymerase III activity (GO:0001056)	7
GO_Molecular_Function_2018	phosphatidylinositol bisphosphate kinase activity (GO:0052813)	7
GO_Molecular_Function_2018	omega peptidase activity (GO:0008242)	7
GO_Molecular_Function_2018	transcriptional activator activity, RNA polymerase II core promoter proximal region sequence-specific binding (GO:0001077)	7
GO_Molecular_Function_2018	cytokine activity (GO:0005125)	6
GO_Molecular_Function_2018	histone deacetylase activity (GO:0004407)	6
GO_Molecular_Function_2018	ubiquitin-like protein conjugating enzyme activity (GO:0061650)	6
GO_Molecular_Function_2018	1-phosphatidylinositol-4-phosphate 5-kinase activity (GO:0016308)	6
GO_Molecular_Function_2018	sodium:amino acid symporter activity (GO:0005283)	6
GO_Molecular_Function_2018	ligand-dependent nuclear receptor transcription coactivator activity (GO:0030374)	6
GO_Molecular_Function_2018	neuropeptide receptor activity (GO:0008188)	6
GO_Molecular_Function_2018	G-protein beta/gamma-subunit complex binding (GO:0031683)	6
GO_Molecular_Function_2018	excitatory extracellular ligand-gated ion channel activity (GO:0005231)	6
GO_Molecular_Function_2018	I-SMAD binding (GO:0070411)	6
GO_Molecular_Function_2018	ankyrin binding (GO:0030506)	6
GO_Molecular_Function_2018	phosphatidylinositol monophosphate phosphatase activity (GO:0052744)	6
GO_Molecular_Function_2018	phosphatidylinositol-3-phosphatase activity (GO:0004438)	6
GO_Molecular_Function_2018	inorganic cation transmembrane transporter activity (GO:0022890)	6
GO_Molecular_Function_2018	guanyl ribonucleotide binding (GO:0032561)	6
GO_Molecular_Function_2018	G-protein activated inward rectifier potassium channel activity (GO:0015467)	6
GO_Molecular_Function_2018	lipoprotein lipase activity (GO:0004465)	6
GO_Molecular_Function_2018	N-acetylglucosamine 6-O-sulfotransferase activity (GO:0001517)	6
GO_Molecular_Function_2018	glutamate receptor binding (GO:0035254)	6
GO_Molecular_Function_2018	ubiquitin-ubiquitin ligase activity (GO:0034450)	6
GO_Molecular_Function_2018	ligand-gated cation channel activity (GO:0099094)	6
GO_Molecular_Function_2018	single-stranded telomeric DNA binding (GO:0043047)	6
GO_Molecular_Function_2018	DNA binding (GO:0003677)	6
GO_Molecular_Function_2018	protein kinase A regulatory subunit binding (GO:0034237)	5
GO_Molecular_Function_2018	ether hydrolase activity (GO:0016803)	5
GO_Molecular_Function_2018	primary amine oxidase activity (GO:0008131)	5
GO_Molecular_Function_2018	carbonate dehydratase activity (GO:0004089)	5
GO_Molecular_Function_2018	neuropeptide binding (GO:0042923)	5
GO_Molecular_Function_2018	bicarbonate transmembrane transporter activity (GO:0015106)	5
GO_Molecular_Function_2018	semaphorin receptor activity (GO:0017154)	5
GO_Molecular_Function_2018	vasopressin receptor activity (GO:0005000)	5
GO_Molecular_Function_2018	methylation-dependent protein binding (GO:0140034)	5
GO_Molecular_Function_2018	[heparan sulfate]-glucosamine 3-sulfotransferase 1 activity (GO:0008467)	5
GO_Molecular_Function_2018	ATPase activity, coupled to transmembrane movement of substances (GO:0042626)	5
GO_Molecular_Function_2018	phosphotransferase activity, alcohol group as acceptor (GO:0016773)	5
GO_Molecular_Function_2018	MAP kinase activity (GO:0004707)	5
GO_Molecular_Function_2018	type I interferon receptor binding (GO:0005132)	5
GO_Molecular_Function_2018	sodium:potassium-exchanging ATPase activity (GO:0005391)	5
GO_Molecular_Function_2018	potassium-transporting ATPase activity (GO:0008556)	5
GO_Molecular_Function_2018	nitric-oxide synthase binding (GO:0050998)	5
GO_Molecular_Function_2018	RNA stem-loop binding (GO:0035613)	5
GO_Molecular_Function_2018	PDZ domain binding (GO:0030165)	5
GO_Molecular_Function_2018	cholesterol transporter activity (GO:0017127)	5
GO_Molecular_Function_2018	lipoprotein particle receptor binding (GO:0070325)	5
GO_Molecular_Function_2018	phosphatidylcholine transporter activity (GO:0008525)	5
GO_Molecular_Function_2018	endodeoxyribonuclease activity, producing 3'-phosphomonoesters (GO:0016889)	5
GO_Molecular_Function_2018	cysteine-type endopeptidase inhibitor activity involved in apoptotic process (GO:0043027)	5
GO_Molecular_Function_2018	cation:cation antiporter activity (GO:0015491)	5
GO_Molecular_Function_2018	exonuclease activity (GO:0004527)	5
GO_Molecular_Function_2018	monocarboxylic acid transmembrane transporter activity (GO:0008028)	5
GO_Molecular_Function_2018	telomeric DNA binding (GO:0042162)	5
GO_Molecular_Function_2018	hydrogen-exporting ATPase activity (GO:0036442)	5
GO_Molecular_Function_2018	ATPase activity, coupled to transmembrane movement of ions, rotational mechanism (GO:0044769)	5
GO_Molecular_Function_2018	phosphatidylinositol 3-kinase activity (GO:0035004)	5
GO_Molecular_Function_2018	regulatory region DNA binding (GO:0000975)	5
GO_Molecular_Function_2018	metalloaminopeptidase activity (GO:0070006)	5
GO_Molecular_Function_2018	hyaluronic acid binding (GO:0005540)	5
GO_Molecular_Function_2018	lipase activator activity (GO:0060229)	5
GO_Molecular_Function_2018	inward rectifier potassium channel activity (GO:0005242)	5
GO_Molecular_Function_2018	exopeptidase activity (GO:0008238)	5
GO_Molecular_Function_2018	G-rich strand telomeric DNA binding (GO:0098505)	5
GO_Molecular_Function_2018	protein transporter activity (GO:0008565)	5
GO_Molecular_Function_2018	SH3/SH2 adaptor activity (GO:0005070)	5
GO_Molecular_Function_2018	calcium channel inhibitor activity (GO:0019855)	4
GO_Molecular_Function_2018	MHC class I receptor activity (GO:0032393)	4
GO_Molecular_Function_2018	CoA hydrolase activity (GO:0016289)	4
GO_Molecular_Function_2018	calcium channel regulator activity (GO:0005246)	4
GO_Molecular_Function_2018	basal RNA polymerase II transcription machinery binding (GO:0001099)	4
GO_Molecular_Function_2018	phosphofructokinase activity (GO:0008443)	4
GO_Molecular_Function_2018	calcium-dependent cysteine-type endopeptidase activity (GO:0004198)	4
GO_Molecular_Function_2018	protein deacetylase activity (GO:0033558)	4
GO_Molecular_Function_2018	protein kinase activator activity (GO:0030295)	4
GO_Molecular_Function_2018	double-stranded DNA binding (GO:0003690)	4
GO_Molecular_Function_2018	deoxyribonuclease activity (GO:0004536)	4
GO_Molecular_Function_2018	high voltage-gated calcium channel activity (GO:0008331)	4
GO_Molecular_Function_2018	methylated histone binding (GO:0035064)	4
GO_Molecular_Function_2018	histone-lysine N-methyltransferase activity (GO:0018024)	4
GO_Molecular_Function_2018	transcriptional activator activity, RNA polymerase II transcription regulatory region sequence-specific binding (GO:0001228)	4
GO_Molecular_Function_2018	fatty acid ligase activity (GO:0015645)	4
GO_Molecular_Function_2018	single-stranded DNA-dependent ATPase activity (GO:0043142)	4
GO_Molecular_Function_2018	G-protein coupled receptor binding (GO:0001664)	4
GO_Molecular_Function_2018	vascular endothelial growth factor-activated receptor activity (GO:0005021)	4
GO_Molecular_Function_2018	aspartic-type endopeptidase activity (GO:0004190)	4
GO_Molecular_Function_2018	voltage-gated ion channel activity involved in regulation of postsynaptic membrane potential (GO:1905030)	4
GO_Molecular_Function_2018	lipase activity (GO:0016298)	4
GO_Molecular_Function_2018	interleukin-1 receptor binding (GO:0005149)	4
GO_Molecular_Function_2018	oxidoreductase activity, acting on a sulfur group of donors, disulfide as acceptor (GO:0016671)	4
GO_Molecular_Function_2018	DNA-directed 5'-3' RNA polymerase activity (GO:0003899)	4
GO_Molecular_Function_2018	sequence-specific double-stranded DNA binding (GO:1990837)	4
GO_Molecular_Function_2018	RNA polymerase II regulatory region DNA binding (GO:0001012)	4
GO_Molecular_Function_2018	ubiquitin protein ligase activity (GO:0061630)	4
GO_Molecular_Function_2018	hydrolase activity, acting on carbon-nitrogen (but not peptide) bonds, in linear amides (GO:0016811)	4
GO_Molecular_Function_2018	methyl-CpG binding (GO:0008327)	4
GO_Molecular_Function_2018	hydrolase activity, acting on acid anhydrides, catalyzing transmembrane movement of substances (GO:0016820)	4
GO_Molecular_Function_2018	phosphatidylinositol binding (GO:0035091)	4
GO_Molecular_Function_2018	natural killer cell lectin-like receptor binding (GO:0046703)	4
GO_Molecular_Function_2018	phosphatidylinositol-4,5-bisphosphate 3-kinase activity (GO:0046934)	4
GO_Molecular_Function_2018	aryl sulfotransferase activity (GO:0004062)	4
GO_Molecular_Function_2018	fibroblast growth factor receptor binding (GO:0005104)	4
GO_Molecular_Function_2018	double-stranded telomeric DNA binding (GO:0003691)	4
GO_Molecular_Function_2018	actin-dependent ATPase activity (GO:0030898)	4
GO_Molecular_Function_2018	repressing transcription factor binding (GO:0070491)	4
GO_Molecular_Function_2018	phosphatidic acid binding (GO:0070300)	4
GO_Molecular_Function_2018	galactosyltransferase activity (GO:0008378)	4
GO_Molecular_Function_2018	GTPase activity (GO:0003924)	4
GO_Molecular_Function_2018	m7G(5')pppN diphosphatase activity (GO:0050072)	4
GO_Molecular_Function_2018	lipoprotein transporter activity (GO:0042954)	4
GO_Molecular_Function_2018	protein tyrosine phosphatase activity (GO:0004725)	4
GO_Molecular_Function_2018	transmembrane receptor protein tyrosine phosphatase activity (GO:0005001)	4
GO_Molecular_Function_2018	transmembrane receptor protein phosphatase activity (GO:0019198)	4
GO_Molecular_Function_2018	bile acid binding (GO:0032052)	4
GO_Molecular_Function_2018	complement receptor activity (GO:0004875)	3
GO_Molecular_Function_2018	RNA polymerase II core binding (GO:0000993)	3
GO_Molecular_Function_2018	ion channel inhibitor activity (GO:0008200)	3
GO_Molecular_Function_2018	prenyltransferase activity (GO:0004659)	3
GO_Molecular_Function_2018	alkali metal ion binding (GO:0031420)	3
GO_Molecular_Function_2018	tRNA (guanine) methyltransferase activity (GO:0016423)	3
GO_Molecular_Function_2018	chloride channel inhibitor activity (GO:0019869)	3
GO_Molecular_Function_2018	phospholipase activator activity (GO:0016004)	3
GO_Molecular_Function_2018	NEDD8-specific protease activity (GO:0019784)	3
GO_Molecular_Function_2018	anion:cation symporter activity (GO:0015296)	3
GO_Molecular_Function_2018	cysteine-type endopeptidase activity (GO:0004197)	3
GO_Molecular_Function_2018	cysteine-type peptidase activity (GO:0008234)	3
GO_Molecular_Function_2018	voltage-gated cation channel activity (GO:0022843)	3
GO_Molecular_Function_2018	MHC protein complex binding (GO:0023023)	3
GO_Molecular_Function_2018	immunoglobulin binding (GO:0019865)	3
GO_Molecular_Function_2018	transcription corepressor activity (GO:0003714)	3
GO_Molecular_Function_2018	microtubule-severing ATPase activity (GO:0008568)	3
GO_Molecular_Function_2018	aldehyde dehydrogenase (NAD) activity (GO:0004029)	3
GO_Molecular_Function_2018	transferase activity, transferring acyl groups other than amino-acyl groups (GO:0016747)	3
GO_Molecular_Function_2018	mechanically-gated ion channel activity (GO:0008381)	3
GO_Molecular_Function_2018	cyclin-dependent protein serine/threonine kinase activity (GO:0004693)	3
GO_Molecular_Function_2018	vinculin binding (GO:0017166)	3
GO_Molecular_Function_2018	insulin receptor binding (GO:0005158)	3
GO_Molecular_Function_2018	pseudouridine synthase activity (GO:0009982)	3
GO_Molecular_Function_2018	ATP-dependent microtubule motor activity (GO:1990939)	3
GO_Molecular_Function_2018	oxidoreductase activity, acting on single donors with incorporation of molecular oxygen, incorporation of two atoms of oxygen (GO:0016702)	3
GO_Molecular_Function_2018	cAMP-dependent protein kinase regulator activity (GO:0008603)	3
GO_Molecular_Function_2018	ATPase activator activity (GO:0001671)	3
GO_Molecular_Function_2018	phosphotransferase activity, for other substituted phosphate groups (GO:0016780)	3
GO_Molecular_Function_2018	bubble DNA binding (GO:0000405)	3
GO_Molecular_Function_2018	core promoter binding (GO:0001047)	3
GO_Molecular_Function_2018	phospholipid transporter activity (GO:0005548)	3
GO_Molecular_Function_2018	ATPase activity (GO:0016887)	3
GO_Molecular_Function_2018	sulfotransferase activity (GO:0008146)	3
GO_Molecular_Function_2018	MHC class II protein complex binding (GO:0023026)	3
GO_Molecular_Function_2018	transcription regulatory region sequence-specific DNA binding (GO:0000976)	3
GO_Molecular_Function_2018	ubiquitin-like protein ligase activity (GO:0061659)	3
GO_Molecular_Function_2018	phospholipase activity (GO:0004620)	3
GO_Molecular_Function_2018	lysophospholipase activity (GO:0004622)	3
GO_Molecular_Function_2018	chitinase activity (GO:0004568)	3
GO_Molecular_Function_2018	sugar:proton symporter activity (GO:0005351)	3
GO_Molecular_Function_2018	amyloid-beta binding (GO:0001540)	3
GO_Molecular_Function_2018	growth factor receptor binding (GO:0070851)	3
GO_Molecular_Function_2018	5'-3' RNA polymerase activity (GO:0034062)	3
GO_Molecular_Function_2018	dynein complex binding (GO:0070840)	3
GO_Molecular_Function_2018	JUN kinase binding (GO:0008432)	3
GO_Molecular_Function_2018	aldehyde dehydrogenase [NAD(P)+] activity (GO:0004030)	3
GO_Molecular_Function_2018	opioid receptor activity (GO:0004985)	3
GO_Molecular_Function_2018	RNA polymerase II carboxy-terminal domain kinase activity (GO:0008353)	3
GO_Molecular_Function_2018	Toll-like receptor binding (GO:0035325)	3
GO_Molecular_Function_2018	DNA-dependent ATPase activity (GO:0008094)	3
GO_Molecular_Function_2018	phosphorylase activity (GO:0004645)	3
GO_Molecular_Function_2018	serine-type carboxypeptidase activity (GO:0004185)	3
GO_Molecular_Function_2018	serine-type exopeptidase activity (GO:0070008)	3
GO_Molecular_Function_2018	manganese ion transmembrane transporter activity (GO:0005384)	3
GO_Molecular_Function_2018	phosphatidylinositol-3-phosphate binding (GO:0032266)	3
GO_Molecular_Function_2018	1-phosphatidylinositol binding (GO:0005545)	3
GO_Molecular_Function_2018	alcohol dehydrogenase activity, zinc-dependent (GO:0004024)	3
GO_Molecular_Function_2018	FK506 binding (GO:0005528)	3
GO_Molecular_Function_2018	patched binding (GO:0005113)	3
GO_Molecular_Function_2018	Tat protein binding (GO:0030957)	3
GO_Molecular_Function_2018	myosin V binding (GO:0031489)	3
GO_Molecular_Function_2018	fucosyltransferase activity (GO:0008417)	3
GO_Molecular_Function_2018	peptide transmembrane transporter activity (GO:1904680)	3
GO_Molecular_Function_2018	peptidase inhibitor activity (GO:0030414)	3
GO_Molecular_Function_2018	cAMP-dependent protein kinase inhibitor activity (GO:0004862)	3
GO_Molecular_Function_2018	guanylate kinase activity (GO:0004385)	3
GO_Molecular_Function_2018	RNA polymerase II basal transcription factor binding (GO:0001091)	3
GO_Molecular_Function_2018	arylesterase activity (GO:0004064)	3
GO_Molecular_Function_2018	anion:anion antiporter activity (GO:0015301)	3
GO_Molecular_Function_2018	phosphatidylinositol 3-kinase regulator activity (GO:0035014)	3
GO_Molecular_Function_2018	oxidoreductase activity, oxidizing metal ions, NAD or NADP as acceptor (GO:0016723)	3
GO_Molecular_Function_2018	calcium activated cation channel activity (GO:0005227)	2
GO_Molecular_Function_2018	DNA ligase activity (GO:0003909)	2
GO_Molecular_Function_2018	ion gated channel activity (GO:0022839)	2
GO_Molecular_Function_2018	intronic transcription regulatory region sequence-specific DNA binding (GO:0001161)	2
GO_Molecular_Function_2018	NADP-retinol dehydrogenase activity (GO:0052650)	2
GO_Molecular_Function_2018	3-chloroallyl aldehyde dehydrogenase activity (GO:0004028)	2
GO_Molecular_Function_2018	potassium ion binding (GO:0030955)	2
GO_Molecular_Function_2018	sodium ion transmembrane transporter activity (GO:0015081)	2
GO_Molecular_Function_2018	protein serine/threonine/tyrosine kinase activity (GO:0004712)	2
GO_Molecular_Function_2018	neutral amino acid transmembrane transporter activity (GO:0015175)	2
GO_Molecular_Function_2018	amino acid transmembrane transporter activity (GO:0015171)	2
GO_Molecular_Function_2018	glycine transmembrane transporter activity (GO:0015187)	2
GO_Molecular_Function_2018	N-acyltransferase activity (GO:0016410)	2
GO_Molecular_Function_2018	intracellular calcium activated chloride channel activity (GO:0005229)	2
GO_Molecular_Function_2018	intracellular chloride channel activity (GO:0061778)	2
GO_Molecular_Function_2018	ubiquitin-like protein conjugating enzyme binding (GO:0044390)	2
GO_Molecular_Function_2018	RNA polymerase II core promoter sequence-specific DNA binding (GO:0000979)	2
GO_Molecular_Function_2018	acylglycerol O-acyltransferase activity (GO:0016411)	2
GO_Molecular_Function_2018	protein-lysine N-methyltransferase activity (GO:0016279)	2
GO_Molecular_Function_2018	1-acylglycerol-3-phosphate O-acyltransferase activity (GO:0003841)	2
GO_Molecular_Function_2018	LBD domain binding (GO:0050693)	2
GO_Molecular_Function_2018	2-acylglycerol-3-phosphate O-acyltransferase activity (GO:0047144)	2
GO_Molecular_Function_2018	intramolecular oxidoreductase activity, transposing S-S bonds (GO:0016864)	2
GO_Molecular_Function_2018	protein disulfide isomerase activity (GO:0003756)	2
GO_Molecular_Function_2018	tau-protein kinase activity (GO:0050321)	2
GO_Molecular_Function_2018	poly(G) binding (GO:0034046)	2
GO_Molecular_Function_2018	lysine N-methyltransferase activity (GO:0016278)	2
GO_Molecular_Function_2018	heparan sulfate sulfotransferase activity (GO:0034483)	2
GO_Molecular_Function_2018	phosphatidylinositol-3,5-bisphosphate phosphatase activity (GO:0106018)	2
GO_Molecular_Function_2018	hyalurononglucosaminidase activity (GO:0004415)	2
GO_Molecular_Function_2018	SH3 domain binding (GO:0017124)	2
GO_Molecular_Function_2018	oxidoreductase activity, acting on NAD(P)H, oxygen as acceptor (GO:0050664)	2
GO_Molecular_Function_2018	ligand-gated ion channel activity (GO:0015276)	2
GO_Molecular_Function_2018	organic acid:sodium symporter activity (GO:0005343)	2
GO_Molecular_Function_2018	protein kinase regulator activity (GO:0019887)	2
GO_Molecular_Function_2018	phosphatidylinositol-3,5-bisphosphate 3-phosphatase activity (GO:0052629)	2
GO_Molecular_Function_2018	cyclin-dependent protein kinase activity (GO:0097472)	2
GO_Molecular_Function_2018	histone serine kinase activity (GO:0035174)	2
GO_Molecular_Function_2018	SUMO-specific protease activity (GO:0016929)	2
GO_Molecular_Function_2018	transforming growth factor beta binding (GO:0050431)	2
GO_Molecular_Function_2018	armadillo repeat domain binding (GO:0070016)	2
GO_Molecular_Function_2018	protein kinase C activity (GO:0004697)	2
GO_Molecular_Function_2018	tubulin binding (GO:0015631)	2
GO_Molecular_Function_2018	phosphoserine residue binding (GO:0050815)	2
GO_Molecular_Function_2018	MHC class II receptor activity (GO:0032395)	2
GO_Molecular_Function_2018	SUMO transferase activity (GO:0019789)	2
GO_Molecular_Function_2018	ATPase activity, coupled (GO:0042623)	2
GO_Molecular_Function_2018	transcriptional activator activity, RNA polymerase II distal enhancer sequence-specific binding (GO:0001205)	2
GO_Molecular_Function_2018	Ral GTPase binding (GO:0017160)	2
GO_Molecular_Function_2018	ammonium transmembrane transporter activity (GO:0008519)	2
GO_Molecular_Function_2018	dicarboxylic acid transmembrane transporter activity (GO:0005310)	2
GO_Molecular_Function_2018	zinc ion transmembrane transporter activity (GO:0005385)	2
GO_Molecular_Function_2018	small GTPase binding (GO:0031267)	2
GO_Molecular_Function_2018	GTPase binding (GO:0051020)	2
GO_Molecular_Function_2018	platelet-derived growth factor binding (GO:0048407)	2
GO_Molecular_Function_2018	snoRNA binding (GO:0030515)	2
GO_Molecular_Function_2018	GABA receptor binding (GO:0050811)	2
GO_Molecular_Function_2018	beta-tubulin binding (GO:0048487)	2
GO_Molecular_Function_2018	kinesin binding (GO:0019894)	2
GO_Molecular_Function_2018	peptidase activity, acting on L-amino acid peptides (GO:0070011)	2
GO_Molecular_Function_2018	G-protein coupled serotonin receptor activity (GO:0004993)	2
GO_Molecular_Function_2018	dipeptidase activity (GO:0016805)	2
GO_Molecular_Function_2018	serotonin receptor activity (GO:0099589)	2
GO_Molecular_Function_2018	RNA polymerase core enzyme binding (GO:0043175)	2
GO_Molecular_Function_2018	G-protein coupled glutamate receptor binding (GO:0035256)	2
GO_Molecular_Function_2018	trace-amine receptor activity (GO:0001594)	2
GO_Molecular_Function_2018	alpha-(1->3)-fucosyltransferase activity (GO:0046920)	2
GO_Molecular_Function_2018	exoribonuclease activity (GO:0004532)	2
GO_Molecular_Function_2018	endodeoxyribonuclease activity, producing 5'-phosphomonoesters (GO:0016888)	2
GO_Molecular_Function_2018	disordered domain specific binding (GO:0097718)	2
GO_Molecular_Function_2018	voltage-gated ion channel activity (GO:0005244)	2
GO_Molecular_Function_2018	intramolecular oxidoreductase activity, transposing C=C bonds (GO:0016863)	2
GO_Molecular_Function_2018	NADH dehydrogenase activity (GO:0003954)	2
GO_Molecular_Function_2018	peptide-lysine-N-acetyltransferase activity (GO:0061733)	2
GO_Molecular_Function_2018	phosphate ion binding (GO:0042301)	2
GO_Molecular_Function_2018	3'-5'-exodeoxyribonuclease activity (GO:0008296)	2
GO_Molecular_Function_2018	mRNA 3'-UTR binding (GO:0003730)	2
GO_Molecular_Function_2018	potassium ion transmembrane transporter activity (GO:0015079)	2
GO_Molecular_Function_2018	3'-5' exonuclease activity (GO:0008408)	2
GO_Molecular_Function_2018	sphingolipid transporter activity (GO:0046624)	2
GO_Molecular_Function_2018	transition metal ion transmembrane transporter activity (GO:0046915)	2
GO_Molecular_Function_2018	DNA-(apurinic or apyrimidinic site) lyase activity (GO:0003906)	2
GO_Molecular_Function_2018	glutathione transferase activity (GO:0004364)	2
GO_Molecular_Function_2018	proton-transporting ATPase activity, rotational mechanism (GO:0046961)	2
GO_Molecular_Function_2018	alpha-N-acetylneuraminate alpha-2,8-sialyltransferase activity (GO:0003828)	2
GO_Molecular_Function_2018	transcription factor activity, RNA polymerase II core promoter sequence-specific binding involved in preinitiation complex assembly (GO:0001075)	2
GO_Molecular_Function_2018	activin binding (GO:0048185)	2
GO_Molecular_Function_2018	oxidoreductase activity, acting on paired donors, with incorporation or reduction of molecular oxygen, NAD(P)H as one donor, and incorporation of one atom of oxygen (GO:0016709)	2
GO_Molecular_Function_2018	Notch binding (GO:0005112)	2
GO_Molecular_Function_2018	superoxide-generating NADPH oxidase activator activity (GO:0016176)	2
GO_Molecular_Function_2018	carnitine transmembrane transporter activity (GO:0015226)	2
GO_Molecular_Function_2018	amino-acid betaine transmembrane transporter activity (GO:0015199)	2
GO_Molecular_Function_2018	ionotropic glutamate receptor binding (GO:0035255)	2
GO_Molecular_Function_2018	histone deacetylase binding (GO:0042826)	2
GO_Molecular_Function_2018	oxidoreductase activity, acting on the CH-NH2 group of donors, oxygen as acceptor (GO:0016641)	2
GO_Molecular_Function_2018	ceramidase activity (GO:0017040)	2
GO_Molecular_Function_2018	Rho guanyl-nucleotide exchange factor activity (GO:0005089)	2
GO_Molecular_Function_2018	G-protein coupled nucleotide receptor activity (GO:0001608)	2
GO_Molecular_Function_2018	G-protein coupled purinergic nucleotide receptor activity (GO:0045028)	2
GO_Molecular_Function_2018	arachidonic acid monooxygenase activity (GO:0008391)	2
GO_Molecular_Function_2018	arachidonic acid epoxygenase activity (GO:0008392)	2
GO_Molecular_Function_2018	steroid dehydrogenase activity, acting on the CH-OH group of donors, NAD or NADP as acceptor (GO:0033764)	2
GO_Molecular_Function_2018	calcium-transporting ATPase activity (GO:0005388)	2
GO_Molecular_Function_2018	ATPase activity, coupled to transmembrane movement of ions, phosphorylative mechanism (GO:0015662)	2
GO_Molecular_Function_2018	beta-galactoside (CMP) alpha-2,3-sialyltransferase activity (GO:0003836)	2
GO_Molecular_Function_2018	peptidoglycan binding (GO:0042834)	2
GO_Molecular_Function_2018	hydrogen-exporting ATPase activity, phosphorylative mechanism (GO:0008553)	2
GO_Molecular_Function_2018	double-stranded RNA binding (GO:0003725)	2
GO_Molecular_Function_2018	O-methyltransferase activity (GO:0008171)	2
GO_Molecular_Function_2018	sulfate transmembrane transporter activity (GO:0015116)	2
GO_Molecular_Function_2018	protein kinase A catalytic subunit binding (GO:0034236)	2
GO_Molecular_Function_2018	ephrin receptor activity (GO:0005003)	2
GO_Molecular_Function_2018	transmembrane-ephrin receptor activity (GO:0005005)	2
GO_Molecular_Function_2018	carboxylic ester hydrolase activity (GO:0052689)	2
GO_Molecular_Function_2018	G-protein coupled neurotransmitter receptor activity (GO:0099528)	2
GO_Molecular_Function_2018	G-protein coupled acetylcholine receptor activity (GO:0016907)	2
GO_Molecular_Function_2018	SH2 domain binding (GO:0042169)	1
GO_Molecular_Function_2018	adenylate cyclase binding (GO:0008179)	1
GO_Molecular_Function_2018	prostaglandin receptor activity (GO:0004955)	1
GO_Molecular_Function_2018	type II transforming growth factor beta receptor binding (GO:0005114)	1
GO_Molecular_Function_2018	protein phosphatase activator activity (GO:0072542)	1
GO_Molecular_Function_2018	retinoic acid binding (GO:0001972)	1
GO_Molecular_Function_2018	poly-pyrimidine tract binding (GO:0008187)	1
GO_Molecular_Function_2018	retinoid binding (GO:0005501)	1
GO_Molecular_Function_2018	chromo shadow domain binding (GO:0070087)	1
GO_Molecular_Function_2018	phosphatidylinositol phosphate kinase activity (GO:0016307)	1
GO_Molecular_Function_2018	L-amino acid transmembrane transporter activity (GO:0015179)	1
GO_Molecular_Function_2018	dipeptidyl-peptidase activity (GO:0008239)	1
GO_Molecular_Function_2018	activin-activated receptor activity (GO:0017002)	1
GO_Molecular_Function_2018	antiporter activity (GO:0015297)	1
GO_Molecular_Function_2018	actinin binding (GO:0042805)	1
GO_Molecular_Function_2018	growth factor activity (GO:0008083)	1
GO_Molecular_Function_2018	GABA-A receptor activity (GO:0004890)	1
GO_Molecular_Function_2018	GABA receptor activity (GO:0016917)	1
GO_Molecular_Function_2018	Lys63-specific deubiquitinase activity (GO:0061578)	1
GO_Molecular_Function_2018	G-protein coupled photoreceptor activity (GO:0008020)	1
GO_Molecular_Function_2018	lysophosphatidic acid acyltransferase activity (GO:0042171)	1
GO_Molecular_Function_2018	ATPase coupled ion transmembrane transporter activity (GO:0042625)	1
GO_Molecular_Function_2018	Lys48-specific deubiquitinase activity (GO:1990380)	1
GO_Molecular_Function_2018	benzodiazepine receptor activity (GO:0008503)	1
GO_Molecular_Function_2018	protein methyltransferase activity (GO:0008276)	1
GO_Molecular_Function_2018	pre-mRNA 3'-splice site binding (GO:0030628)	1
GO_Molecular_Function_2018	GDP-dissociation inhibitor activity (GO:0005092)	1
GO_Molecular_Function_2018	endoribonuclease activity, producing 5'-phosphomonoesters (GO:0016891)	1
GO_Molecular_Function_2018	thiol-dependent ubiquitinyl hydrolase activity (GO:0036459)	1
GO_Molecular_Function_2018	calcium:cation antiporter activity (GO:0015368)	1
GO_Molecular_Function_2018	superoxide-generating NADPH oxidase activity (GO:0016175)	1
GO_Molecular_Function_2018	ribosomal protein S6 kinase activity (GO:0004711)	1
GO_Molecular_Function_2018	extracellular ligand-gated ion channel activity (GO:0005230)	1
GO_Molecular_Function_2018	glucocorticoid receptor binding (GO:0035259)	1
GO_Molecular_Function_2018	O-acetyltransferase activity (GO:0016413)	1
GO_Molecular_Function_2018	histone methyltransferase activity (GO:0042054)	1
GO_Molecular_Function_2018	transcriptional repressor activity, RNA polymerase II activating transcription factor binding (GO:0098811)	1
GO_Molecular_Function_2018	histone kinase activity (GO:0035173)	1
GO_Molecular_Function_2018	peptide N-acetyltransferase activity (GO:0034212)	1
GO_Molecular_Function_2018	MAP kinase phosphatase activity (GO:0033549)	1
GO_Molecular_Function_2018	outward rectifier potassium channel activity (GO:0015271)	1
GO_Molecular_Function_2018	acyl-CoA oxidase activity (GO:0003997)	1
GO_Molecular_Function_2018	ADP binding (GO:0043531)	1
GO_Molecular_Function_2018	insulin-like growth factor I binding (GO:0031994)	1
GO_Molecular_Function_2018	MHC class I protein binding (GO:0042288)	1
GO_Molecular_Function_2018	nucleoside-triphosphatase activity (GO:0017111)	1
GO_Molecular_Function_2018	U6 snRNA binding (GO:0017070)	1
GO_Molecular_Function_2018	alpha-sialidase activity (GO:0016997)	1
GO_Molecular_Function_2018	exo-alpha-sialidase activity (GO:0004308)	1
GO_Molecular_Function_2018	retinoid X receptor binding (GO:0046965)	1
GO_Molecular_Function_2018	complement component C1q binding (GO:0001849)	1
GO_Molecular_Function_2018	RNA polymerase II transcription corepressor activity (GO:0001106)	1
GO_Molecular_Function_2018	MHC protein binding (GO:0042287)	1
GO_Molecular_Function_2018	polyubiquitin modification-dependent protein binding (GO:0031593)	1
GO_Molecular_Function_2018	C4-dicarboxylate transmembrane transporter activity (GO:0015556)	1
GO_Molecular_Function_2018	single-stranded DNA binding (GO:0003697)	1
GO_Molecular_Function_2018	ubiquitin-like protein-specific protease activity (GO:0019783)	1
GO_Molecular_Function_2018	protein disulfide oxidoreductase activity (GO:0015035)	1
GO_Molecular_Function_2018	mannose binding (GO:0005537)	1
GO_Molecular_Function_2018	nucleoside kinase activity (GO:0019206)	1
GO_Molecular_Function_2018	calcium-dependent protein serine/threonine phosphatase activity (GO:0004723)	1
GO_Molecular_Function_2018	tRNA methyltransferase activity (GO:0008175)	1
GO_Molecular_Function_2018	sequence-specific mRNA binding (GO:1990825)	1
GO_Molecular_Function_2018	oxidoreductase activity, acting on paired donors, with incorporation or reduction of molecular oxygen, 2-oxoglutarate as one donor, and incorporation of one atom each of oxygen into both donors (GO:0016706)	1
GO_Molecular_Function_2018	muscle alpha-actinin binding (GO:0051371)	1
GO_Molecular_Function_2018	neuropilin binding (GO:0038191)	1
GO_Molecular_Function_2018	3',5'-cyclic-nucleotide phosphodiesterase activity (GO:0004114)	1
GO_Molecular_Function_2018	nucleoside-triphosphate diphosphatase activity (GO:0047429)	1
GO_Molecular_Function_2018	leukotriene receptor activity (GO:0004974)	1
GO_Molecular_Function_2018	cysteinyl leukotriene receptor activity (GO:0001631)	1
GO_Molecular_Function_2018	RNA polymerase I regulatory region sequence-specific DNA binding (GO:0001163)	1
GO_Molecular_Function_2018	RNA polymerase I CORE element sequence-specific DNA binding (GO:0001164)	1
GO_Molecular_Function_2018	histone acetyltransferase activity (GO:0004402)	1
GO_Molecular_Function_2018	NAADP-sensitive calcium-release channel activity (GO:0072345)	1
GO_Molecular_Function_2018	GTP-Rho binding (GO:0017049)	1
GO_Molecular_Function_2018	eukaryotic initiation factor 4E binding (GO:0008190)	1
GO_Molecular_Function_2018	AT DNA binding (GO:0003680)	1
GO_Molecular_Function_2018	steroid hormone receptor binding (GO:0035258)	1
GO_Molecular_Function_2018	fibroblast growth factor binding (GO:0017134)	1
GO_Molecular_Function_2018	NAD(P)H oxidase activity (GO:0016174)	1
GO_Molecular_Function_2018	miRNA binding (GO:0035198)	1
GO_Molecular_Function_2018	phosphate ion transmembrane transporter activity (GO:0015114)	1
GO_Molecular_Function_2018	gap junction channel activity (GO:0005243)	1
GO_Molecular_Function_2018	voltage-gated anion channel activity (GO:0008308)	1
GO_Molecular_Function_2018	enhancer sequence-specific DNA binding (GO:0001158)	1
GO_Molecular_Function_2018	translation initiation factor activity (GO:0003743)	1
GO_Molecular_Function_2018	potassium channel activity (GO:0005267)	1
GO_Molecular_Function_2018	sodium channel activity (GO:0005272)	1
GO_Molecular_Function_2018	L-ornithine transmembrane transporter activity (GO:0000064)	1
GO_Molecular_Function_2018	poly(A)-specific ribonuclease activity (GO:0004535)	1
GO_Molecular_Function_2018	ligand-dependent nuclear receptor binding (GO:0016922)	1
GO_Molecular_Function_2018	translation elongation factor activity (GO:0003746)	1
GO_Molecular_Function_2018	peroxisome proliferator activated receptor binding (GO:0042975)	1
GO_Molecular_Function_2018	lipase inhibitor activity (GO:0055102)	1
GO_Molecular_Function_2018	magnesium ion binding (GO:0000287)	1
GO_Molecular_Function_2018	cation-transporting ATPase activity (GO:0019829)	1
GO_Molecular_Function_2018	CXCR chemokine receptor binding (GO:0045236)	1
GO_Molecular_Function_2018	acetylcholine receptor regulator activity (GO:0030548)	1
GO_Molecular_Function_2018	BMP receptor activity (GO:0098821)	1
GO_Molecular_Function_2018	monocarboxylic acid binding (GO:0033293)	1
GO_Molecular_Function_2018	helicase activity (GO:0004386)	1
GO_Molecular_Function_2018	transforming growth factor beta receptor binding (GO:0005160)	1
GO_Molecular_Function_2018	Ran GTPase binding (GO:0008536)	1
GO_Molecular_Function_2018	phospholipid scramblase activity (GO:0017128)	1
GO_Molecular_Function_2018	retinol binding (GO:0019841)	1
GO_Molecular_Function_2018	protein kinase C binding (GO:0005080)	1
GO_Molecular_Function_2018	NADH dehydrogenase (ubiquinone) activity (GO:0008137)	1
GO_Molecular_Function_2018	NADH dehydrogenase (quinone) activity (GO:0050136)	1
GO_Molecular_Function_2018	myosin heavy chain binding (GO:0032036)	1
GO_Molecular_Function_2018	transcription factor activity, RNA polymerase II core promoter sequence-specific (GO:0000983)	1
GO_Molecular_Function_2018	DNA binding, bending (GO:0008301)	1
GO_Molecular_Function_2018	alditol:NADP+ 1-oxidoreductase activity (GO:0004032)	1
GO_Molecular_Function_2018	intramolecular transferase activity, phosphotransferases (GO:0016868)	1
GO_Molecular_Function_2018	nucleotide kinase activity (GO:0019201)	1
GO_Molecular_Function_2018	7SK snRNA binding (GO:0097322)	1
GO_Molecular_Function_2018	histone methyltransferase binding (GO:1990226)	1
GO_Molecular_Function_2018	ketosteroid monooxygenase activity (GO:0047086)	1
GO_Molecular_Function_2018	core promoter proximal region DNA binding (GO:0001159)	1
GO_Molecular_Function_2018	DNA-directed DNA polymerase activity (GO:0003887)	1
GO_Molecular_Function_2018	transcription coactivator binding (GO:0001223)	1
GO_Molecular_Function_2018	transcription cofactor binding (GO:0001221)	1
GO_Molecular_Function_2018	calcium-activated potassium channel activity (GO:0015269)	1
GO_Molecular_Function_2018	dopamine neurotransmitter receptor activity (GO:0004952)	1
GO_Molecular_Function_2018	phosphatidylinositol-4-phosphate binding (GO:0070273)	1
GO_Molecular_Function_2018	non-membrane spanning protein tyrosine kinase activity (GO:0004715)	1
GO_Molecular_Function_2018	G-quadruplex DNA binding (GO:0051880)	1
GO_Molecular_Function_2018	U1 snRNA binding (GO:0030619)	1
GO_Molecular_Function_2018	endopeptidase regulator activity (GO:0061135)	1
GO_Molecular_Function_2018	protein-lysine 6-oxidase activity (GO:0004720)	1
GO_Molecular_Function_2018	steroid hydroxylase activity (GO:0008395)	1
GO_Molecular_Function_2018	dopamine binding (GO:0035240)	1
GO_Molecular_Function_2018	voltage-gated potassium channel activity (GO:0005249)	1
GO_Molecular_Function_2018	aryl hydrocarbon receptor binding (GO:0017162)	1
GO_Molecular_Function_2018	ammonium ion binding (GO:0070405)	1
GO_Molecular_Function_2018	histone demethylase activity (H3-K9 specific) (GO:0032454)	1
GO_Molecular_Function_2018	GPI anchor binding (GO:0034235)	1
GO_Molecular_Function_2018	protein binding involved in cell-matrix adhesion (GO:0098634)	1
GO_Molecular_Function_2018	Rac guanyl-nucleotide exchange factor activity (GO:0030676)	1
GO_Molecular_Function_2018	ribosomal large subunit binding (GO:0043023)	1
GO_Molecular_Function_2018	2 iron, 2 sulfur cluster binding (GO:0051537)	1
GO_Molecular_Function_2018	protein-DNA loading ATPase activity (GO:0033170)	1
GO_Molecular_Function_2018	DNA clamp loader activity (GO:0003689)	1
GO_Molecular_Function_2018	phosphatidylinositol-3,5-bisphosphate binding (GO:0080025)	1
GO_Molecular_Function_2018	hydro-lyase activity (GO:0016836)	1
GO_Molecular_Function_2018	Arp2/3 complex binding (GO:0071933)	1
GO_Molecular_Function_2018	voltage-gated potassium channel activity involved in ventricular cardiac muscle cell action potential repolarization (GO:1902282)	1
GO_Molecular_Function_2018	ribonuclease P activity (GO:0004526)	1
GO_Molecular_Function_2018	DNA N-glycosylase activity (GO:0019104)	1
GO_Molecular_Function_2018	NADPH binding (GO:0070402)	1
GO_Molecular_Function_2018	ubiquitin conjugating enzyme binding (GO:0031624)	1
GO_Molecular_Function_2018	ATP-dependent microtubule motor activity, minus-end-directed (GO:0008569)	1
GO_Molecular_Function_2018	purinergic nucleotide receptor activity (GO:0001614)	1
GO_Molecular_Function_2018	cytochrome-b5 reductase activity, acting on NAD(P)H (GO:0004128)	1
GO_Molecular_Function_2018	single-stranded RNA binding (GO:0003727)	1
GO_Molecular_Function_2018	ion transmembrane transporter activity (GO:0015075)	1
GO_Molecular_Function_2018	Rac GTPase binding (GO:0048365)	1
GO_Molecular_Function_2018	chloride transmembrane transporter activity (GO:0015108)	1
GO_Molecular_Function_2018	oxalate transmembrane transporter activity (GO:0019531)	1
GO_Molecular_Function_2018	chloride channel activity (GO:0005254)	1
GO_Molecular_Function_2018	RNA polymerase II activity (GO:0001055)	1
GO_Molecular_Function_2018	anion channel activity (GO:0005253)	1
GO_Molecular_Function_2018	inhibitory extracellular ligand-gated ion channel activity (GO:0005237)	1
GO_Molecular_Function_2018	ligand-gated anion channel activity (GO:0099095)	1
GO_Molecular_Function_2018	voltage-gated sodium channel activity (GO:0005248)	1
GO_Molecular_Function_2018	glucosyltransferase activity (GO:0046527)	1
GO_Molecular_Function_2018	cysteine-type endopeptidase activity involved in execution phase of apoptosis (GO:0097200)	1
GO_Molecular_Function_2018	ubiquitin-protein transferase activity (GO:0004842)	1
GO_Molecular_Function_2018	protein serine/threonine kinase inhibitor activity (GO:0030291)	1
GO_Molecular_Function_2018	myosin binding (GO:0017022)	1
GO_Molecular_Function_2018	mRNA 5'-UTR binding (GO:0048027)	1
GO_Molecular_Function_2018	glycine binding (GO:0016594)	1
GO_Molecular_Function_2018	potassium:proton antiporter activity (GO:0015386)	1
GO_Molecular_Function_2018	phospholipid-translocating ATPase activity (GO:0004012)	1
GO_Molecular_Function_2018	glucose transmembrane transporter activity (GO:0005355)	1
GO_Molecular_Function_2018	macromolecule transmembrane transporter activity (GO:0022884)	1
GO_Molecular_Function_2018	phosphotransferase activity, phosphate group as acceptor (GO:0016776)	1
GO_Molecular_Function_2018	aldo-keto reductase (NADP) activity (GO:0004033)	1
GO_Molecular_Function_2018	hydrolase activity, acting on carbon-nitrogen (but not peptide) bonds, in linear amidines (GO:0016813)	1

## Sheet: GO Cellular Component
Database	Enriched term	Number of CTCs
GO_Cellular_Component_2018	nuclear transcription factor complex (GO:0044798)	53
GO_Cellular_Component_2018	mitochondrion (GO:0005739)	48
GO_Cellular_Component_2018	intermediate filament (GO:0005882)	46
GO_Cellular_Component_2018	keratin filament (GO:0045095)	44
GO_Cellular_Component_2018	catenin complex (GO:0016342)	44
GO_Cellular_Component_2018	AIM2 inflammasome complex (GO:0097169)	43
GO_Cellular_Component_2018	NLRP3 inflammasome complex (GO:0072559)	43
GO_Cellular_Component_2018	IPAF inflammasome complex (GO:0072557)	40
GO_Cellular_Component_2018	telomerase holoenzyme complex (GO:0005697)	40
GO_Cellular_Component_2018	P granule (GO:0043186)	39
GO_Cellular_Component_2018	azurophil granule membrane (GO:0035577)	32
GO_Cellular_Component_2018	ficolin-1-rich granule membrane (GO:0101003)	31
GO_Cellular_Component_2018	nuclear body (GO:0016604)	31
GO_Cellular_Component_2018	intermediate filament cytoskeleton (GO:0045111)	30
GO_Cellular_Component_2018	azurophil granule (GO:0042582)	30
GO_Cellular_Component_2018	polymeric cytoskeletal fiber (GO:0099513)	29
GO_Cellular_Component_2018	contractile fiber (GO:0043292)	29
GO_Cellular_Component_2018	myofibril (GO:0030016)	28
GO_Cellular_Component_2018	nucleoplasm part (GO:0044451)	28
GO_Cellular_Component_2018	secondary lysosome (GO:0005767)	28
GO_Cellular_Component_2018	cytoskeleton (GO:0005856)	27
GO_Cellular_Component_2018	cytoplasmic ribonucleoprotein granule (GO:0036464)	27
GO_Cellular_Component_2018	U7 snRNP (GO:0005683)	26
GO_Cellular_Component_2018	cation channel complex (GO:0034703)	25
GO_Cellular_Component_2018	perinuclear region of cytoplasm (GO:0048471)	25
GO_Cellular_Component_2018	Cul4A-RING E3 ubiquitin ligase complex (GO:0031464)	25
GO_Cellular_Component_2018	spindle midzone (GO:0051233)	24
GO_Cellular_Component_2018	Golgi stack (GO:0005795)	24
GO_Cellular_Component_2018	mitochondrial outer membrane (GO:0005741)	24
GO_Cellular_Component_2018	striated muscle thin filament (GO:0005865)	23
GO_Cellular_Component_2018	nuclear speck (GO:0016607)	23
GO_Cellular_Component_2018	anchored component of external side of plasma membrane (GO:0031362)	22
GO_Cellular_Component_2018	actin cytoskeleton (GO:0015629)	22
GO_Cellular_Component_2018	RNA polymerase II transcription factor complex (GO:0090575)	22
GO_Cellular_Component_2018	condensed chromosome kinetochore (GO:0000777)	21
GO_Cellular_Component_2018	pi-body (GO:0071546)	21
GO_Cellular_Component_2018	platelet dense granule (GO:0042827)	20
GO_Cellular_Component_2018	spindle microtubule (GO:0005876)	20
GO_Cellular_Component_2018	autophagosome membrane (GO:0000421)	20
GO_Cellular_Component_2018	exocytic vesicle (GO:0070382)	20
GO_Cellular_Component_2018	INO80-type complex (GO:0097346)	20
GO_Cellular_Component_2018	Golgi subcompartment (GO:0098791)	20
GO_Cellular_Component_2018	nuclear chromosome part (GO:0044454)	20
GO_Cellular_Component_2018	Rad51B-Rad51C-Rad51D-XRCC2 complex (GO:0033063)	19
GO_Cellular_Component_2018	Set1C/COMPASS complex (GO:0048188)	19
GO_Cellular_Component_2018	centriolar satellite (GO:0034451)	19
GO_Cellular_Component_2018	AMPA glutamate receptor complex (GO:0032281)	19
GO_Cellular_Component_2018	signal recognition particle (GO:0048500)	19
GO_Cellular_Component_2018	vacuole (GO:0005773)	19
GO_Cellular_Component_2018	pseudopodium (GO:0031143)	18
GO_Cellular_Component_2018	Golgi cisterna (GO:0031985)	18
GO_Cellular_Component_2018	cis-Golgi network (GO:0005801)	18
GO_Cellular_Component_2018	Golgi cisterna membrane (GO:0032580)	18
GO_Cellular_Component_2018	Golgi cis cisterna (GO:0000137)	18
GO_Cellular_Component_2018	intrinsic component of external side of plasma membrane (GO:0031233)	18
GO_Cellular_Component_2018	ionotropic glutamate receptor complex (GO:0008328)	17
GO_Cellular_Component_2018	commitment complex (GO:0000243)	17
GO_Cellular_Component_2018	endoplasmic reticulum-Golgi intermediate compartment membrane (GO:0033116)	17
GO_Cellular_Component_2018	integral component of plasma membrane (GO:0005887)	17
GO_Cellular_Component_2018	sarcoplasm (GO:0016528)	17
GO_Cellular_Component_2018	early endosome (GO:0005769)	17
GO_Cellular_Component_2018	methylosome (GO:0034709)	16
GO_Cellular_Component_2018	L-type voltage-gated calcium channel complex (GO:1990454)	15
GO_Cellular_Component_2018	PRC1 complex (GO:0035102)	15
GO_Cellular_Component_2018	pre-autophagosomal structure (GO:0000407)	15
GO_Cellular_Component_2018	nuclear ubiquitin ligase complex (GO:0000152)	15
GO_Cellular_Component_2018	microtubule organizing center part (GO:0044450)	15
GO_Cellular_Component_2018	mitochondrial matrix (GO:0005759)	15
GO_Cellular_Component_2018	MLL1/2 complex (GO:0044665)	14
GO_Cellular_Component_2018	MLL1 complex (GO:0071339)	14
GO_Cellular_Component_2018	platelet dense granule lumen (GO:0031089)	14
GO_Cellular_Component_2018	secretory granule lumen (GO:0034774)	14
GO_Cellular_Component_2018	anchored component of plasma membrane (GO:0046658)	14
GO_Cellular_Component_2018	tertiary granule (GO:0070820)	13
GO_Cellular_Component_2018	intrinsic component of mitochondrial inner membrane (GO:0031304)	13
GO_Cellular_Component_2018	ficolin-1-rich granule (GO:0101002)	13
GO_Cellular_Component_2018	gamma-secretase complex (GO:0070765)	13
GO_Cellular_Component_2018	coated vesicle (GO:0030135)	13
GO_Cellular_Component_2018	centrosome (GO:0005813)	12
GO_Cellular_Component_2018	beta-catenin-TCF complex (GO:1990907)	12
GO_Cellular_Component_2018	neurotransmitter receptor complex (GO:0098878)	12
GO_Cellular_Component_2018	manchette (GO:0002177)	12
GO_Cellular_Component_2018	spindle (GO:0005819)	11
GO_Cellular_Component_2018	microtubule cytoskeleton (GO:0015630)	11
GO_Cellular_Component_2018	ribonucleoprotein granule (GO:0035770)	11
GO_Cellular_Component_2018	germ plasm (GO:0060293)	11
GO_Cellular_Component_2018	pericentric heterochromatin (GO:0005721)	11
GO_Cellular_Component_2018	integral component of nuclear inner membrane (GO:0005639)	10
GO_Cellular_Component_2018	sarcoplasmic reticulum (GO:0016529)	10
GO_Cellular_Component_2018	microtubule minus-end (GO:0036449)	9
GO_Cellular_Component_2018	node of Ranvier (GO:0033268)	9
GO_Cellular_Component_2018	U2-type prespliceosome (GO:0071004)	9
GO_Cellular_Component_2018	spindle pole body (GO:0005816)	9
GO_Cellular_Component_2018	prespliceosome (GO:0071010)	9
GO_Cellular_Component_2018	mitochondrial respiratory chain complex IV (GO:0005751)	9
GO_Cellular_Component_2018	actomyosin (GO:0042641)	8
GO_Cellular_Component_2018	intrinsic component of the cytoplasmic side of the plasma membrane (GO:0031235)	8
GO_Cellular_Component_2018	intercalated disc (GO:0014704)	8
GO_Cellular_Component_2018	DNA-directed RNA polymerase III complex (GO:0005666)	8
GO_Cellular_Component_2018	azurophil granule lumen (GO:0035578)	8
GO_Cellular_Component_2018	nuclear chromatin (GO:0000790)	8
GO_Cellular_Component_2018	mitotic spindle pole (GO:0097431)	7
GO_Cellular_Component_2018	nuclear exosome (RNase complex) (GO:0000176)	7
GO_Cellular_Component_2018	kinesin complex (GO:0005871)	7
GO_Cellular_Component_2018	vacuolar lumen (GO:0005775)	7
GO_Cellular_Component_2018	cytoplasmic vesicle membrane (GO:0030659)	7
GO_Cellular_Component_2018	DNA-directed RNA polymerase complex (GO:0000428)	7
GO_Cellular_Component_2018	AP-3 adaptor complex (GO:0030123)	7
GO_Cellular_Component_2018	U12-type spliceosomal complex (GO:0005689)	7
GO_Cellular_Component_2018	BAF-type complex (GO:0090544)	6
GO_Cellular_Component_2018	lytic vacuole (GO:0000323)	6
GO_Cellular_Component_2018	micro-ribonucleoprotein complex (GO:0035068)	6
GO_Cellular_Component_2018	cyclin-dependent protein kinase activating kinase holoenzyme complex (GO:0019907)	6
GO_Cellular_Component_2018	histone methyltransferase complex (GO:0035097)	6
GO_Cellular_Component_2018	CD40 receptor complex (GO:0035631)	6
GO_Cellular_Component_2018	brush border membrane (GO:0031526)	6
GO_Cellular_Component_2018	platelet alpha granule lumen (GO:0031093)	5
GO_Cellular_Component_2018	platelet alpha granule (GO:0031091)	5
GO_Cellular_Component_2018	integral component of mitochondrial membrane (GO:0032592)	5
GO_Cellular_Component_2018	Ino80 complex (GO:0031011)	5
GO_Cellular_Component_2018	nuclear nucleosome (GO:0000788)	5
GO_Cellular_Component_2018	microtubule (GO:0005874)	5
GO_Cellular_Component_2018	cytoplasmic vesicle lumen (GO:0060205)	5
GO_Cellular_Component_2018	autophagosome (GO:0005776)	5
GO_Cellular_Component_2018	specific granule membrane (GO:0035579)	5
GO_Cellular_Component_2018	caveola (GO:0005901)	5
GO_Cellular_Component_2018	mitotic spindle midzone (GO:1990023)	4
GO_Cellular_Component_2018	membrane raft (GO:0045121)	4
GO_Cellular_Component_2018	axon initial segment (GO:0043194)	4
GO_Cellular_Component_2018	STAGA complex (GO:0030914)	4
GO_Cellular_Component_2018	early phagosome (GO:0032009)	4
GO_Cellular_Component_2018	main axon (GO:0044304)	4
GO_Cellular_Component_2018	Golgi lumen (GO:0005796)	4
GO_Cellular_Component_2018	condensed chromosome (GO:0000793)	4
GO_Cellular_Component_2018	smooth endoplasmic reticulum (GO:0005790)	4
GO_Cellular_Component_2018	actin filament (GO:0005884)	4
GO_Cellular_Component_2018	condensed chromosome, centromeric region (GO:0000779)	4
GO_Cellular_Component_2018	ficolin-1-rich granule lumen (GO:1904813)	4
GO_Cellular_Component_2018	T cell receptor complex (GO:0042101)	4
GO_Cellular_Component_2018	nuclear chromosome (GO:0000228)	4
GO_Cellular_Component_2018	lysosomal membrane (GO:0005765)	4
GO_Cellular_Component_2018	autolysosome (GO:0044754)	4
GO_Cellular_Component_2018	focal adhesion (GO:0005925)	4
GO_Cellular_Component_2018	holo TFIIH complex (GO:0005675)	4
GO_Cellular_Component_2018	Golgi-associated vesicle (GO:0005798)	4
GO_Cellular_Component_2018	U4 snRNP (GO:0005687)	3
GO_Cellular_Component_2018	polysome (GO:0005844)	3
GO_Cellular_Component_2018	nuclear inclusion body (GO:0042405)	3
GO_Cellular_Component_2018	nuclear DNA-directed RNA polymerase complex (GO:0055029)	3
GO_Cellular_Component_2018	lipid droplet (GO:0005811)	3
GO_Cellular_Component_2018	centriole (GO:0005814)	3
GO_Cellular_Component_2018	microtubule organizing center (GO:0005815)	3
GO_Cellular_Component_2018	MHC protein complex (GO:0042611)	3
GO_Cellular_Component_2018	MHC class II protein complex (GO:0042613)	3
GO_Cellular_Component_2018	ER to Golgi transport vesicle membrane (GO:0012507)	3
GO_Cellular_Component_2018	spherical high-density lipoprotein particle (GO:0034366)	3
GO_Cellular_Component_2018	early endosome membrane (GO:0031901)	3
GO_Cellular_Component_2018	Golgi membrane (GO:0000139)	3
GO_Cellular_Component_2018	lysosomal lumen (GO:0043202)	3
GO_Cellular_Component_2018	Cul4-RING E3 ubiquitin ligase complex (GO:0080008)	3
GO_Cellular_Component_2018	flotillin complex (GO:0016600)	3
GO_Cellular_Component_2018	clathrin-sculpted gamma-aminobutyric acid transport vesicle membrane (GO:0061202)	3
GO_Cellular_Component_2018	clathrin-sculpted gamma-aminobutyric acid transport vesicle (GO:0061200)	3
GO_Cellular_Component_2018	lytic vacuole membrane (GO:0098852)	3
GO_Cellular_Component_2018	nuclear replisome (GO:0043601)	3
GO_Cellular_Component_2018	nucleolus (GO:0005730)	3
GO_Cellular_Component_2018	nuclear cyclin-dependent protein kinase holoenzyme complex (GO:0019908)	3
GO_Cellular_Component_2018	endoplasmic reticulum-Golgi intermediate compartment (GO:0005793)	3
GO_Cellular_Component_2018	nuclear inner membrane (GO:0005637)	3
GO_Cellular_Component_2018	microtubule end (GO:1990752)	2
GO_Cellular_Component_2018	U1 snRNP (GO:0005685)	2
GO_Cellular_Component_2018	spectrin-associated cytoskeleton (GO:0014731)	2
GO_Cellular_Component_2018	SWI/SNF complex (GO:0016514)	2
GO_Cellular_Component_2018	spindle pole centrosome (GO:0031616)	2
GO_Cellular_Component_2018	COPI-coated vesicle (GO:0030137)	2
GO_Cellular_Component_2018	filopodium (GO:0030175)	2
GO_Cellular_Component_2018	cytoplasmic exosome (RNase complex) (GO:0000177)	2
GO_Cellular_Component_2018	signal recognition particle, endoplasmic reticulum targeting (GO:0005786)	2
GO_Cellular_Component_2018	primary lysosome (GO:0005766)	2
GO_Cellular_Component_2018	integral component of lumenal side of endoplasmic reticulum membrane (GO:0071556)	2
GO_Cellular_Component_2018	integral component of endoplasmic reticulum membrane (GO:0030176)	2
GO_Cellular_Component_2018	mitochondrial small ribosomal subunit (GO:0005763)	2
GO_Cellular_Component_2018	trans-Golgi network (GO:0005802)	2
GO_Cellular_Component_2018	condensed nuclear chromosome kinetochore (GO:0000778)	2
GO_Cellular_Component_2018	COPII vesicle coat (GO:0030127)	2
GO_Cellular_Component_2018	very-low-density lipoprotein particle (GO:0034361)	2
GO_Cellular_Component_2018	specific granule (GO:0042581)	2
GO_Cellular_Component_2018	clathrin-coated vesicle (GO:0030136)	2
GO_Cellular_Component_2018	chromatin (GO:0000785)	2
GO_Cellular_Component_2018	endocytic vesicle lumen (GO:0071682)	2
GO_Cellular_Component_2018	preribosome, small subunit precursor (GO:0030688)	2
GO_Cellular_Component_2018	Swr1 complex (GO:0000812)	2
GO_Cellular_Component_2018	chromosome (GO:0005694)	2
GO_Cellular_Component_2018	cell cortex part (GO:0044448)	2
GO_Cellular_Component_2018	fibrillar center (GO:0001650)	2
GO_Cellular_Component_2018	endocytic vesicle (GO:0030139)	2
GO_Cellular_Component_2018	SCF ubiquitin ligase complex (GO:0019005)	2
GO_Cellular_Component_2018	bicellular tight junction (GO:0005923)	2
GO_Cellular_Component_2018	cytoplasmic dynein complex (GO:0005868)	2
GO_Cellular_Component_2018	integral component of mitochondrial inner membrane (GO:0031305)	2
GO_Cellular_Component_2018	actin cortical patch (GO:0030479)	2
GO_Cellular_Component_2018	endocytic patch (GO:0061645)	2
GO_Cellular_Component_2018	nuclear telomere cap complex (GO:0000783)	2
GO_Cellular_Component_2018	septin cytoskeleton (GO:0032156)	2
GO_Cellular_Component_2018	septin ring (GO:0005940)	2
GO_Cellular_Component_2018	septin filament array (GO:0032160)	2
GO_Cellular_Component_2018	precatalytic spliceosome (GO:0071011)	1
GO_Cellular_Component_2018	npBAF complex (GO:0071564)	1
GO_Cellular_Component_2018	mRNA cleavage and polyadenylation specificity factor complex (GO:0005847)	1
GO_Cellular_Component_2018	endoribonuclease complex (GO:1902555)	1
GO_Cellular_Component_2018	mitochondrial inner membrane presequence translocase complex (GO:0005744)	1
GO_Cellular_Component_2018	HAUS complex (GO:0070652)	1
GO_Cellular_Component_2018	GABA-A receptor complex (GO:1902711)	1
GO_Cellular_Component_2018	ATP-binding cassette (ABC) transporter complex (GO:0043190)	1
GO_Cellular_Component_2018	messenger ribonucleoprotein complex (GO:1990124)	1
GO_Cellular_Component_2018	axonal growth cone (GO:0044295)	1
GO_Cellular_Component_2018	contractile actin filament bundle (GO:0097517)	1
GO_Cellular_Component_2018	stress fiber (GO:0001725)	1
GO_Cellular_Component_2018	endoplasmic reticulum quality control compartment (GO:0044322)	1
GO_Cellular_Component_2018	MLL3/4 complex (GO:0044666)	1
GO_Cellular_Component_2018	insulin-responsive compartment (GO:0032593)	1
GO_Cellular_Component_2018	condensed nuclear chromosome, centromeric region (GO:0000780)	1
GO_Cellular_Component_2018	platelet dense granule membrane (GO:0031088)	1
GO_Cellular_Component_2018	unconventional myosin complex (GO:0016461)	1
GO_Cellular_Component_2018	COPII-coated ER to Golgi transport vesicle (GO:0030134)	1
GO_Cellular_Component_2018	recycling endosome (GO:0055037)	1
GO_Cellular_Component_2018	recycling endosome membrane (GO:0055038)	1
GO_Cellular_Component_2018	DNA-directed RNA polymerase II, holoenzyme (GO:0016591)	1
GO_Cellular_Component_2018	U4/U6 x U5 tri-snRNP complex (GO:0046540)	1
GO_Cellular_Component_2018	small ribosomal subunit (GO:0015935)	1
GO_Cellular_Component_2018	clathrin-coated endocytic vesicle membrane (GO:0030669)	1
GO_Cellular_Component_2018	clathrin-coated endocytic vesicle (GO:0045334)	1
GO_Cellular_Component_2018	trans-Golgi network transport vesicle (GO:0030140)	1
GO_Cellular_Component_2018	H3 histone acetyltransferase complex (GO:0070775)	1
GO_Cellular_Component_2018	MOZ/MORF histone acetyltransferase complex (GO:0070776)	1
GO_Cellular_Component_2018	Cdc73/Paf1 complex (GO:0016593)	1
GO_Cellular_Component_2018	specific granule lumen (GO:0035580)	1
GO_Cellular_Component_2018	mitochondrial outer membrane translocase complex (GO:0005742)	1
GO_Cellular_Component_2018	calcium channel complex (GO:0034704)	1
GO_Cellular_Component_2018	replication fork (GO:0005657)	1
GO_Cellular_Component_2018	nuclear proteasome complex (GO:0031595)	1
GO_Cellular_Component_2018	sodium channel complex (GO:0034706)	1
GO_Cellular_Component_2018	COPI vesicle coat (GO:0030126)	1
GO_Cellular_Component_2018	small nuclear ribonucleoprotein complex (GO:0030532)	1
GO_Cellular_Component_2018	peroxisomal membrane (GO:0005778)	1
GO_Cellular_Component_2018	multivesicular body lumen (GO:0097486)	1
GO_Cellular_Component_2018	mitochondrial large ribosomal subunit (GO:0005762)	1
GO_Cellular_Component_2018	chromosome, telomeric region (GO:0000781)	1
GO_Cellular_Component_2018	endosome lumen (GO:0031904)	1
GO_Cellular_Component_2018	vesicle coat (GO:0030120)	1
GO_Cellular_Component_2018	U2-type catalytic step 2 spliceosome (GO:0071007)	1
GO_Cellular_Component_2018	Cul3-RING ubiquitin ligase complex (GO:0031463)	1
GO_Cellular_Component_2018	late endosome lumen (GO:0031906)	1
GO_Cellular_Component_2018	RNA polymerase III transcription factor complex (GO:0090576)	1
GO_Cellular_Component_2018	CHD-type complex (GO:0090545)	1
GO_Cellular_Component_2018	NuRD complex (GO:0016581)	1
GO_Cellular_Component_2018	membrane attack complex (GO:0005579)	1
GO_Cellular_Component_2018	lamellar body (GO:0042599)	1
GO_Cellular_Component_2018	P-body (GO:0000932)	1
GO_Cellular_Component_2018	oxoglutarate dehydrogenase complex (GO:0045252)	1
GO_Cellular_Component_2018	nucleolar ribonuclease P complex (GO:0005655)	1
GO_Cellular_Component_2018	nucleolar part (GO:0044452)	1
GO_Cellular_Component_2018	outer dynein arm (GO:0036157)	1
GO_Cellular_Component_2018	transcription factor TFIID complex (GO:0005669)	1
GO_Cellular_Component_2018	mitochondrial envelope (GO:0005740)	1
GO_Cellular_Component_2018	heterochromatin (GO:0000792)	1
GO_Cellular_Component_2018	apical dendrite (GO:0097440)	1
GO_Cellular_Component_2018	death-inducing signaling complex (GO:0031264)	1
GO_Cellular_Component_2018	nuclear heterochromatin (GO:0005720)	1
GO_Cellular_Component_2018	multimeric ribonuclease P complex (GO:0030681)	1
GO_Cellular_Component_2018	filopodium tip (GO:0032433)	1
GO_Cellular_Component_2018	endolysosome (GO:0036019)	1
GO_Cellular_Component_2018	spanning component of membrane (GO:0089717)	1
GO_Cellular_Component_2018	transcriptionally active chromatin (GO:0035327)	1
GO_Cellular_Component_2018	polysomal ribosome (GO:0042788)	1
GO_Cellular_Component_2018	endolysosome membrane (GO:0036020)	1
GO_Cellular_Component_2018	integral component of Golgi membrane (GO:0030173)	1
GO_Cellular_Component_2018	spindle pole (GO:0000922)	1
GO_Cellular_Component_2018	endosomal part (GO:0044440)	1
GO_Cellular_Component_2018	endoplasmic reticulum exit site (GO:0070971)	1
GO_Cellular_Component_2018	phagocytic vesicle membrane (GO:0030670)	1
GO_Cellular_Component_2018	alpha DNA polymerase:primase complex (GO:0005658)	1
GO_Cellular_Component_2018	vacuolar proton-transporting V-type ATPase complex (GO:0016471)	1
GO_Cellular_Component_2018	extrinsic component of endosome membrane (GO:0031313)	1
GO_Cellular_Component_2018	phagocytic vesicle (GO:0045335)	1
GO_Cellular_Component_2018	lysosome (GO:0005764)	1
GO_Cellular_Component_2018	junctional sarcoplasmic reticulum membrane (GO:0014701)	1
GO_Cellular_Component_2018	tertiary granule lumen (GO:1904724)	1
GO_Cellular_Component_2018	lateral element (GO:0000800)	1
GO_Cellular_Component_2018	transcription factor TFTC complex (GO:0033276)	1
GO_Cellular_Component_2018	microvillus membrane (GO:0031528)	1
GO_Cellular_Component_2018	axon (GO:0030424)	1
GO_Cellular_Component_2018	proton-transporting V-type ATPase complex (GO:0033176)	1
GO_Cellular_Component_2018	microvillus (GO:0005902)	1
GO_Cellular_Component_2018	MICOS complex (GO:0061617)	1
GO_Cellular_Component_2018	myosin filament (GO:0032982)	1
GO_Cellular_Component_2018	PML body (GO:0016605)	1
GO_Cellular_Component_2018	juxtaparanode region of axon (GO:0044224)	1
GO_Cellular_Component_2018	endoplasmic reticulum lumen (GO:0005788)	1
GO_Cellular_Component_2018	core mediator complex (GO:0070847)	1
GO_Cellular_Component_2018	nuclear origin of replication recognition complex (GO:0005664)	1

## Sheet: GO Biological Process
Database	Enriched term	Number of CTCs
GO_Biological_Process_2018	keratinocyte differentiation (GO:0030216)	66
GO_Biological_Process_2018	peptide cross-linking (GO:0018149)	66
GO_Biological_Process_2018	epidermal cell differentiation (GO:0009913)	66
GO_Biological_Process_2018	skin development (GO:0043588)	66
GO_Biological_Process_2018	extracellular matrix disassembly (GO:0022617)	64
GO_Biological_Process_2018	DNA cytosine deamination (GO:0070383)	59
GO_Biological_Process_2018	regulation of single stranded viral RNA replication via double stranded DNA intermediate (GO:0045091)	59
GO_Biological_Process_2018	negative regulation of single stranded viral RNA replication via double stranded DNA intermediate (GO:0045869)	59
GO_Biological_Process_2018	regulation of alcohol biosynthetic process (GO:1902930)	58
GO_Biological_Process_2018	positive regulation of cytolysis (GO:0045919)	57
GO_Biological_Process_2018	cytidine to uridine editing (GO:0016554)	57
GO_Biological_Process_2018	base conversion or substitution editing (GO:0016553)	57
GO_Biological_Process_2018	epidermis development (GO:0008544)	56
GO_Biological_Process_2018	DNA deamination (GO:0045006)	56
GO_Biological_Process_2018	water transport (GO:0006833)	55
GO_Biological_Process_2018	cellular protein modification process (GO:0006464)	55
GO_Biological_Process_2018	positive regulation of fibroblast proliferation (GO:0048146)	55
GO_Biological_Process_2018	regulation of transposition (GO:0010528)	54
GO_Biological_Process_2018	negative regulation of hydrolase activity (GO:0051346)	53
GO_Biological_Process_2018	positive regulation of immune response (GO:0050778)	53
GO_Biological_Process_2018	Golgi vesicle transport (GO:0048193)	52
GO_Biological_Process_2018	regulation of transforming growth factor beta production (GO:0071634)	51
GO_Biological_Process_2018	regulation of cholesterol metabolic process (GO:0090181)	50
GO_Biological_Process_2018	outer mitochondrial membrane organization (GO:0007008)	49
GO_Biological_Process_2018	sterol biosynthetic process (GO:0016126)	47
GO_Biological_Process_2018	negative regulation of transposition (GO:0010529)	47
GO_Biological_Process_2018	negative regulation of complement activation (GO:0045916)	46
GO_Biological_Process_2018	fluid transport (GO:0042044)	45
GO_Biological_Process_2018	calcium-dependent cell-cell adhesion via plasma membrane cell adhesion molecules (GO:0016339)	45
GO_Biological_Process_2018	negative regulation of protein binding (GO:0032091)	45
GO_Biological_Process_2018	regulation of protein binding (GO:0043393)	44
GO_Biological_Process_2018	vesicle organization (GO:0016050)	44
GO_Biological_Process_2018	regulation of inflammatory response (GO:0050727)	43
GO_Biological_Process_2018	negative regulation of endopeptidase activity (GO:0010951)	43
GO_Biological_Process_2018	cholesterol biosynthetic process (GO:0006695)	43
GO_Biological_Process_2018	myeloid cell activation involved in immune response (GO:0002275)	43
GO_Biological_Process_2018	regulation of B cell proliferation (GO:0030888)	43
GO_Biological_Process_2018	cell-cell junction assembly (GO:0007043)	43
GO_Biological_Process_2018	regulation of cholesterol biosynthetic process (GO:0045540)	43
GO_Biological_Process_2018	cellular response to zinc ion (GO:0071294)	42
GO_Biological_Process_2018	regulation of defense response (GO:0031347)	42
GO_Biological_Process_2018	regulation of cholesterol esterification (GO:0010872)	42
GO_Biological_Process_2018	regulation of AMPA receptor activity (GO:2000311)	42
GO_Biological_Process_2018	nervous system development (GO:0007399)	42
GO_Biological_Process_2018	negative regulation of viral genome replication (GO:0045071)	42
GO_Biological_Process_2018	cellular response to copper ion (GO:0071280)	41
GO_Biological_Process_2018	response to zinc ion (GO:0010043)	41
GO_Biological_Process_2018	response to nitric oxide (GO:0071731)	41
GO_Biological_Process_2018	regulation of immunoglobulin production (GO:0002637)	41
GO_Biological_Process_2018	regulation of serine-type endopeptidase activity (GO:1900003)	41
GO_Biological_Process_2018	keratan sulfate catabolic process (GO:0042340)	41
GO_Biological_Process_2018	neuron projection regeneration (GO:0031102)	41
GO_Biological_Process_2018	response to copper ion (GO:0046688)	40
GO_Biological_Process_2018	cellular zinc ion homeostasis (GO:0006882)	40
GO_Biological_Process_2018	keratan sulfate metabolic process (GO:0042339)	40
GO_Biological_Process_2018	vesicle fusion (GO:0006906)	40
GO_Biological_Process_2018	positive regulation of transforming growth factor beta production (GO:0071636)	39
GO_Biological_Process_2018	synapse assembly (GO:0007416)	39
GO_Biological_Process_2018	organic substance transport (GO:0071702)	39
GO_Biological_Process_2018	neutrophil activation involved in immune response (GO:0002283)	39
GO_Biological_Process_2018	sulfur compound catabolic process (GO:0044273)	39
GO_Biological_Process_2018	cellular response to cadmium ion (GO:0071276)	38
GO_Biological_Process_2018	secondary alcohol biosynthetic process (GO:1902653)	38
GO_Biological_Process_2018	urate transport (GO:0015747)	38
GO_Biological_Process_2018	myeloid dendritic cell activation (GO:0001773)	38
GO_Biological_Process_2018	positive regulation of peptidyl-tyrosine phosphorylation (GO:0050731)	38
GO_Biological_Process_2018	intracellular protein transport (GO:0006886)	38
GO_Biological_Process_2018	cell-cell adhesion mediated by cadherin (GO:0044331)	38
GO_Biological_Process_2018	neutrophil degranulation (GO:0043312)	38
GO_Biological_Process_2018	positive regulation of cholesterol esterification (GO:0010873)	38
GO_Biological_Process_2018	neutrophil mediated immunity (GO:0002446)	38
GO_Biological_Process_2018	protein transport (GO:0015031)	38
GO_Biological_Process_2018	inorganic cation transmembrane transport (GO:0098662)	37
GO_Biological_Process_2018	organelle membrane fusion (GO:0090174)	37
GO_Biological_Process_2018	regulation of cysteine-type endopeptidase activity (GO:2000116)	37
GO_Biological_Process_2018	positive regulation of B cell proliferation (GO:0030890)	37
GO_Biological_Process_2018	retrograde vesicle-mediated transport, Golgi to ER (GO:0006890)	37
GO_Biological_Process_2018	negative regulation of binding (GO:0051100)	37
GO_Biological_Process_2018	positive regulation of lymphocyte proliferation (GO:0050671)	37
GO_Biological_Process_2018	DNA damage response, signal transduction by p53 class mediator resulting in cell cycle arrest (GO:0006977)	37
GO_Biological_Process_2018	regulation of mitotic spindle checkpoint (GO:1903504)	37
GO_Biological_Process_2018	positive regulation of endopeptidase activity (GO:0010950)	37
GO_Biological_Process_2018	response to cadmium ion (GO:0046686)	36
GO_Biological_Process_2018	regulation of cytolysis (GO:0042268)	36
GO_Biological_Process_2018	sodium-independent organic anion transport (GO:0043252)	36
GO_Biological_Process_2018	negative regulation of serine-type endopeptidase activity (GO:1900004)	36
GO_Biological_Process_2018	negative regulation of serine-type peptidase activity (GO:1902572)	36
GO_Biological_Process_2018	regulation of tyrosine phosphorylation of STAT protein (GO:0042509)	36
GO_Biological_Process_2018	cell morphogenesis (GO:0000902)	36
GO_Biological_Process_2018	regulation of protein tyrosine kinase activity (GO:0061097)	36
GO_Biological_Process_2018	signal transduction involved in mitotic G1 DNA damage checkpoint (GO:0072431)	36
GO_Biological_Process_2018	DNA damage checkpoint (GO:0000077)	36
GO_Biological_Process_2018	zinc ion homeostasis (GO:0055069)	35
GO_Biological_Process_2018	nitrogen compound transport (GO:0071705)	35
GO_Biological_Process_2018	cell-cell adhesion via plasma-membrane adhesion molecules (GO:0098742)	35
GO_Biological_Process_2018	metal ion transport (GO:0030001)	35
GO_Biological_Process_2018	adherens junction organization (GO:0034332)	35
GO_Biological_Process_2018	positive regulation of JAK-STAT cascade (GO:0046427)	35
GO_Biological_Process_2018	regulation of glomerular filtration (GO:0003093)	35
GO_Biological_Process_2018	DNA damage induced protein phosphorylation (GO:0006975)	35
GO_Biological_Process_2018	negative regulation of protein oligomerization (GO:0032460)	35
GO_Biological_Process_2018	protein complex assembly (GO:0006461)	34
GO_Biological_Process_2018	regulation of endopeptidase activity (GO:0052548)	34
GO_Biological_Process_2018	amino acid transmembrane transport (GO:0003333)	34
GO_Biological_Process_2018	proline transport (GO:0015824)	34
GO_Biological_Process_2018	leukotriene metabolic process (GO:0006691)	34
GO_Biological_Process_2018	regulation of steroid biosynthetic process (GO:0050810)	34
GO_Biological_Process_2018	neutrophil migration (GO:1990266)	33
GO_Biological_Process_2018	neutrophil chemotaxis (GO:0030593)	33
GO_Biological_Process_2018	granulocyte chemotaxis (GO:0071621)	33
GO_Biological_Process_2018	response to interleukin-1 (GO:0070555)	33
GO_Biological_Process_2018	myeloid leukocyte differentiation (GO:0002573)	33
GO_Biological_Process_2018	regulation of acrosome reaction (GO:0060046)	33
GO_Biological_Process_2018	regulation of glutamate receptor signaling pathway (GO:1900449)	33
GO_Biological_Process_2018	cell-cell junction organization (GO:0045216)	33
GO_Biological_Process_2018	regulation of fibroblast proliferation (GO:0048145)	33
GO_Biological_Process_2018	lipoprotein transport (GO:0042953)	32
GO_Biological_Process_2018	lipoprotein localization (GO:0044872)	32
GO_Biological_Process_2018	monocyte chemotaxis (GO:0002548)	32
GO_Biological_Process_2018	positive regulation of hydrolase activity (GO:0051345)	32
GO_Biological_Process_2018	mononuclear cell differentiation (GO:1903131)	32
GO_Biological_Process_2018	monocyte differentiation (GO:0030224)	32
GO_Biological_Process_2018	keratan sulfate biosynthetic process (GO:0018146)	32
GO_Biological_Process_2018	positive regulation of cytoplasmic transport (GO:1903651)	32
GO_Biological_Process_2018	positive regulation of tyrosine phosphorylation of STAT protein (GO:0042531)	32
GO_Biological_Process_2018	acetyl-CoA metabolic process (GO:0006084)	32
GO_Biological_Process_2018	lipoprotein metabolic process (GO:0042157)	32
GO_Biological_Process_2018	regulation of sterol transport (GO:0032371)	32
GO_Biological_Process_2018	DNA damage response, signal transduction by p53 class mediator (GO:0030330)	32
GO_Biological_Process_2018	cellular triglyceride homeostasis (GO:0035356)	32
GO_Biological_Process_2018	proton transport (GO:0015992)	32
GO_Biological_Process_2018	cellular divalent inorganic cation homeostasis (GO:0072503)	31
GO_Biological_Process_2018	negative regulation of peptidase activity (GO:0010466)	31
GO_Biological_Process_2018	eosinophil chemotaxis (GO:0048245)	31
GO_Biological_Process_2018	eosinophil migration (GO:0072677)	31
GO_Biological_Process_2018	lymphocyte chemotaxis (GO:0048247)	31
GO_Biological_Process_2018	sodium ion transport (GO:0006814)	31
GO_Biological_Process_2018	positive regulation of transcription, DNA-templated (GO:0045893)	31
GO_Biological_Process_2018	monovalent inorganic cation transport (GO:0015672)	31
GO_Biological_Process_2018	negative regulation of cell aging (GO:0090344)	31
GO_Biological_Process_2018	positive regulation of steroid metabolic process (GO:0045940)	31
GO_Biological_Process_2018	triglyceride homeostasis (GO:0070328)	31
GO_Biological_Process_2018	positive regulation of tumor necrosis factor superfamily cytokine production (GO:1903557)	31
GO_Biological_Process_2018	regulation of signal transduction by p53 class mediator (GO:1901796)	31
GO_Biological_Process_2018	regulation of natural killer cell chemotaxis (GO:2000501)	30
GO_Biological_Process_2018	spliceosomal snRNP assembly (GO:0000387)	30
GO_Biological_Process_2018	regulation of nuclease activity (GO:0032069)	30
GO_Biological_Process_2018	regulation of neurotransmitter receptor activity (GO:0099601)	30
GO_Biological_Process_2018	positive regulation of early endosome to late endosome transport (GO:2000643)	30
GO_Biological_Process_2018	cellular protein complex assembly (GO:0043623)	30
GO_Biological_Process_2018	positive regulation of cellular process (GO:0048522)	30
GO_Biological_Process_2018	negative regulation of protein homooligomerization (GO:0032463)	30
GO_Biological_Process_2018	response to prostaglandin E (GO:0034695)	29
GO_Biological_Process_2018	positive regulation of ATPase activity (GO:0032781)	29
GO_Biological_Process_2018	hematopoietic progenitor cell differentiation (GO:0002244)	29
GO_Biological_Process_2018	response to tumor necrosis factor (GO:0034612)	29
GO_Biological_Process_2018	positive regulation of GTPase activity (GO:0043547)	29
GO_Biological_Process_2018	organic anion transport (GO:0015711)	29
GO_Biological_Process_2018	immunoglobulin mediated immune response (GO:0016064)	29
GO_Biological_Process_2018	proteasome-mediated ubiquitin-dependent protein catabolic process (GO:0043161)	29
GO_Biological_Process_2018	membrane depolarization (GO:0051899)	29
GO_Biological_Process_2018	regulation of cellular component organization (GO:0051128)	29
GO_Biological_Process_2018	positive regulation of calcium ion transport into cytosol (GO:0010524)	29
GO_Biological_Process_2018	cellular response to retinoic acid (GO:0071300)	28
GO_Biological_Process_2018	regulation of GTPase activity (GO:0043087)	28
GO_Biological_Process_2018	cellular response to tumor necrosis factor (GO:0071356)	28
GO_Biological_Process_2018	homophilic cell adhesion via plasma membrane adhesion molecules (GO:0007156)	28
GO_Biological_Process_2018	positive regulation of ion transport (GO:0043270)	28
GO_Biological_Process_2018	regulation of cellular localization (GO:0060341)	28
GO_Biological_Process_2018	regulation of response to external stimulus (GO:0032101)	27
GO_Biological_Process_2018	vitamin transport (GO:0051180)	27
GO_Biological_Process_2018	regulation of regulated secretory pathway (GO:1903305)	27
GO_Biological_Process_2018	iron-sulfur cluster assembly (GO:0016226)	27
GO_Biological_Process_2018	cellular metal ion homeostasis (GO:0006875)	27
GO_Biological_Process_2018	regulation of macromolecule metabolic process (GO:0060255)	27
GO_Biological_Process_2018	response to interferon-gamma (GO:0034341)	27
GO_Biological_Process_2018	cellular response to interleukin-1 (GO:0071347)	27
GO_Biological_Process_2018	positive regulation of MAPK cascade (GO:0043410)	27
GO_Biological_Process_2018	detection of chemical stimulus involved in sensory perception of bitter taste (GO:0001580)	27
GO_Biological_Process_2018	sensory perception of bitter taste (GO:0050913)	27
GO_Biological_Process_2018	positive regulation of nucleic acid-templated transcription (GO:1903508)	27
GO_Biological_Process_2018	regulation of cell cycle G1/S phase transition (GO:1902806)	27
GO_Biological_Process_2018	positive regulation of gene expression (GO:0010628)	27
GO_Biological_Process_2018	cellular protein localization (GO:0034613)	27
GO_Biological_Process_2018	regulation of actin cytoskeleton organization (GO:0032956)	27
GO_Biological_Process_2018	regulation of bile acid biosynthetic process (GO:0070857)	27
GO_Biological_Process_2018	spindle assembly checkpoint (GO:0071173)	27
GO_Biological_Process_2018	mitotic spindle assembly checkpoint (GO:0007094)	27
GO_Biological_Process_2018	mitotic spindle checkpoint (GO:0071174)	27
GO_Biological_Process_2018	positive regulation of ERK1 and ERK2 cascade (GO:0070374)	26
GO_Biological_Process_2018	regulation of ERK1 and ERK2 cascade (GO:0070372)	26
GO_Biological_Process_2018	detection of chemical stimulus involved in sensory perception of taste (GO:0050912)	26
GO_Biological_Process_2018	cation transport (GO:0006812)	26
GO_Biological_Process_2018	regulation of chromosome organization (GO:0033044)	26
GO_Biological_Process_2018	lipoxygenase pathway (GO:0019372)	26
GO_Biological_Process_2018	unsaturated fatty acid biosynthetic process (GO:0006636)	26
GO_Biological_Process_2018	cardiocyte differentiation (GO:0035051)	26
GO_Biological_Process_2018	protein maturation (GO:0051604)	26
GO_Biological_Process_2018	ribonucleoprotein complex disassembly (GO:0032988)	26
GO_Biological_Process_2018	ncRNA metabolic process (GO:0034660)	26
GO_Biological_Process_2018	positive regulation of cytokine production (GO:0001819)	26
GO_Biological_Process_2018	oxoacid metabolic process (GO:0043436)	26
GO_Biological_Process_2018	positive regulation of cell cycle arrest (GO:0071158)	26
GO_Biological_Process_2018	cholesterol homeostasis (GO:0042632)	25
GO_Biological_Process_2018	sterol homeostasis (GO:0055092)	25
GO_Biological_Process_2018	cellular response to metal ion (GO:0071248)	25
GO_Biological_Process_2018	cofactor biosynthetic process (GO:0051188)	25
GO_Biological_Process_2018	cholesterol metabolic process (GO:0008203)	25
GO_Biological_Process_2018	protein homotrimerization (GO:0070207)	25
GO_Biological_Process_2018	positive regulation of type 2 immune response (GO:0002830)	25
GO_Biological_Process_2018	muscle contraction (GO:0006936)	25
GO_Biological_Process_2018	proteasomal protein catabolic process (GO:0010498)	25
GO_Biological_Process_2018	potassium ion import across plasma membrane (GO:1990573)	25
GO_Biological_Process_2018	cell cycle G2/M phase transition (GO:0044839)	25
GO_Biological_Process_2018	G2/M transition of mitotic cell cycle (GO:0000086)	25
GO_Biological_Process_2018	protein lipoylation (GO:0009249)	25
GO_Biological_Process_2018	regulation of endothelial cell proliferation (GO:0001936)	24
GO_Biological_Process_2018	sensory perception of chemical stimulus (GO:0007606)	24
GO_Biological_Process_2018	calcium ion transport (GO:0006816)	24
GO_Biological_Process_2018	negative regulation of neuron death (GO:1901215)	24
GO_Biological_Process_2018	sarcomere organization (GO:0045214)	24
GO_Biological_Process_2018	regulation of ATPase activity (GO:0043462)	24
GO_Biological_Process_2018	B cell mediated immunity (GO:0019724)	24
GO_Biological_Process_2018	response to retinoic acid (GO:0032526)	24
GO_Biological_Process_2018	protein complex disassembly (GO:0043241)	24
GO_Biological_Process_2018	cellular response to ketone (GO:1901655)	24
GO_Biological_Process_2018	regulation of cytoskeleton organization (GO:0051493)	24
GO_Biological_Process_2018	regulation of calcium ion transport into cytosol (GO:0010522)	24
GO_Biological_Process_2018	cellular nitrogen compound catabolic process (GO:0044270)	24
GO_Biological_Process_2018	cell projection assembly (GO:0030031)	24
GO_Biological_Process_2018	regulation of interleukin-18 production (GO:0032661)	23
GO_Biological_Process_2018	actomyosin structure organization (GO:0031032)	23
GO_Biological_Process_2018	negative regulation of acute inflammatory response (GO:0002674)	23
GO_Biological_Process_2018	hemidesmosome assembly (GO:0031581)	23
GO_Biological_Process_2018	cell-substrate junction assembly (GO:0007044)	23
GO_Biological_Process_2018	regulation of fertilization (GO:0080154)	23
GO_Biological_Process_2018	response to axon injury (GO:0048678)	23
GO_Biological_Process_2018	cell junction assembly (GO:0034329)	23
GO_Biological_Process_2018	long-chain fatty acid biosynthetic process (GO:0042759)	23
GO_Biological_Process_2018	regulation of water loss via skin (GO:0033561)	23
GO_Biological_Process_2018	establishment of skin barrier (GO:0061436)	23
GO_Biological_Process_2018	cellular response to organonitrogen compound (GO:0071417)	23
GO_Biological_Process_2018	positive regulation of memory T cell differentiation (GO:0043382)	23
GO_Biological_Process_2018	negative regulation of telomere maintenance (GO:0032205)	23
GO_Biological_Process_2018	muscle cell differentiation (GO:0042692)	23
GO_Biological_Process_2018	endothelial cell development (GO:0001885)	23
GO_Biological_Process_2018	positive regulation of cell proliferation (GO:0008284)	23
GO_Biological_Process_2018	positive regulation of protein import into nucleus, translocation (GO:0033160)	23
GO_Biological_Process_2018	cellular response to oxygen-containing compound (GO:1901701)	23
GO_Biological_Process_2018	sensory perception of smell (GO:0007608)	22
GO_Biological_Process_2018	negative regulation of immune response (GO:0050777)	22
GO_Biological_Process_2018	metallo-sulfur cluster assembly (GO:0031163)	22
GO_Biological_Process_2018	gas homeostasis (GO:0033483)	22
GO_Biological_Process_2018	inactivation of MAPK activity (GO:0000188)	22
GO_Biological_Process_2018	chemokine-mediated signaling pathway (GO:0070098)	22
GO_Biological_Process_2018	myofibril assembly (GO:0030239)	22
GO_Biological_Process_2018	cellular response to alcohol (GO:0097306)	22
GO_Biological_Process_2018	fibroblast growth factor receptor signaling pathway (GO:0008543)	22
GO_Biological_Process_2018	acyl-CoA metabolic process (GO:0006637)	22
GO_Biological_Process_2018	activation of GTPase activity (GO:0090630)	22
GO_Biological_Process_2018	fatty acid metabolic process (GO:0006631)	22
GO_Biological_Process_2018	regulation of intracellular signal transduction (GO:1902531)	22
GO_Biological_Process_2018	MAPK cascade (GO:0000165)	22
GO_Biological_Process_2018	cellular response to nitric oxide (GO:0071732)	22
GO_Biological_Process_2018	cellular response to reactive nitrogen species (GO:1902170)	22
GO_Biological_Process_2018	nuclear export (GO:0051168)	22
GO_Biological_Process_2018	cAMP metabolic process (GO:0046058)	22
GO_Biological_Process_2018	platelet-derived growth factor receptor signaling pathway (GO:0048008)	22
GO_Biological_Process_2018	regulation of telomere maintenance via telomere lengthening (GO:1904356)	22
GO_Biological_Process_2018	establishment of endothelial barrier (GO:0061028)	22
GO_Biological_Process_2018	regulation of neurotransmitter secretion (GO:0046928)	22
GO_Biological_Process_2018	cellular transition metal ion homeostasis (GO:0046916)	21
GO_Biological_Process_2018	skeletal muscle contraction (GO:0003009)	21
GO_Biological_Process_2018	negative regulation of cell differentiation (GO:0045596)	21
GO_Biological_Process_2018	regulation of cardiac muscle hypertrophy (GO:0010611)	21
GO_Biological_Process_2018	negative regulation of cardiac muscle hypertrophy (GO:0010614)	21
GO_Biological_Process_2018	positive regulation of protein export from nucleus (GO:0046827)	21
GO_Biological_Process_2018	regulation of protein export from nucleus (GO:0046825)	21
GO_Biological_Process_2018	muscle filament sliding (GO:0030049)	21
GO_Biological_Process_2018	actin-myosin filament sliding (GO:0033275)	21
GO_Biological_Process_2018	regulation of transcription from RNA polymerase II promoter in response to oxidative stress (GO:0043619)	21
GO_Biological_Process_2018	aspartate family amino acid catabolic process (GO:0009068)	21
GO_Biological_Process_2018	icosanoid metabolic process (GO:0006690)	21
GO_Biological_Process_2018	nuclear import (GO:0051170)	21
GO_Biological_Process_2018	acute inflammatory response (GO:0002526)	21
GO_Biological_Process_2018	vesicle-mediated transport (GO:0016192)	21
GO_Biological_Process_2018	regulation of tumor necrosis factor production (GO:0032680)	21
GO_Biological_Process_2018	protein-cofactor linkage (GO:0018065)	21
GO_Biological_Process_2018	negative regulation of cellular senescence (GO:2000773)	21
GO_Biological_Process_2018	positive regulation of steroid biosynthetic process (GO:0010893)	21
GO_Biological_Process_2018	striated muscle tissue development (GO:0014706)	20
GO_Biological_Process_2018	release of sequestered calcium ion into cytosol by endoplasmic reticulum (GO:1903514)	20
GO_Biological_Process_2018	axon development (GO:0061564)	20
GO_Biological_Process_2018	calcium ion homeostasis (GO:0055074)	20
GO_Biological_Process_2018	regulation of dendritic cell antigen processing and presentation (GO:0002604)	20
GO_Biological_Process_2018	regulation of leukocyte migration (GO:0002685)	20
GO_Biological_Process_2018	chemical synaptic transmission (GO:0007268)	20
GO_Biological_Process_2018	negative regulation of JAK-STAT cascade (GO:0046426)	20
GO_Biological_Process_2018	mitotic nuclear division (GO:0140014)	20
GO_Biological_Process_2018	cellular response to hypoxia (GO:0071456)	20
GO_Biological_Process_2018	positive regulation of smooth muscle cell proliferation (GO:0048661)	20
GO_Biological_Process_2018	regulation of establishment of planar polarity (GO:0090175)	20
GO_Biological_Process_2018	non-canonical Wnt signaling pathway (GO:0035567)	20
GO_Biological_Process_2018	chromosome organization (GO:0051276)	20
GO_Biological_Process_2018	Wnt signaling pathway, planar cell polarity pathway (GO:0060071)	20
GO_Biological_Process_2018	sister chromatid segregation (GO:0000819)	20
GO_Biological_Process_2018	positive regulation of stress fiber assembly (GO:0051496)	20
GO_Biological_Process_2018	establishment of spindle localization (GO:0051293)	20
GO_Biological_Process_2018	regulation of G2/M transition of mitotic cell cycle (GO:0010389)	20
GO_Biological_Process_2018	response to endoplasmic reticulum stress (GO:0034976)	20
GO_Biological_Process_2018	phospholipid transport (GO:0015914)	20
GO_Biological_Process_2018	negative regulation of intrinsic apoptotic signaling pathway in response to DNA damage by p53 class mediator (GO:1902166)	20
GO_Biological_Process_2018	positive regulation of protein secretion (GO:0050714)	20
GO_Biological_Process_2018	cellular response to prostaglandin E stimulus (GO:0071380)	19
GO_Biological_Process_2018	negative regulation of endothelial cell proliferation (GO:0001937)	19
GO_Biological_Process_2018	regulation of phosphatase activity (GO:0010921)	19
GO_Biological_Process_2018	midbrain dopaminergic neuron differentiation (GO:1904948)	19
GO_Biological_Process_2018	positive regulation of keratinocyte differentiation (GO:0045618)	19
GO_Biological_Process_2018	histone lysine methylation (GO:0034968)	19
GO_Biological_Process_2018	cellular response to magnesium ion (GO:0071286)	19
GO_Biological_Process_2018	adipose tissue development (GO:0060612)	19
GO_Biological_Process_2018	regulation of cell migration involved in sprouting angiogenesis (GO:0090049)	19
GO_Biological_Process_2018	regulation of transforming growth factor beta2 production (GO:0032909)	19
GO_Biological_Process_2018	cell morphogenesis involved in neuron differentiation (GO:0048667)	19
GO_Biological_Process_2018	microtubule nucleation by microtubule organizing center (GO:0051418)	19
GO_Biological_Process_2018	strand invasion (GO:0042148)	19
GO_Biological_Process_2018	positive regulation of nucleocytoplasmic transport (GO:0046824)	19
GO_Biological_Process_2018	positive regulation of T cell chemotaxis (GO:0010820)	19
GO_Biological_Process_2018	protein modification by small protein removal (GO:0070646)	19
GO_Biological_Process_2018	actin filament organization (GO:0007015)	19
GO_Biological_Process_2018	negative regulation of epithelial cell migration (GO:0010633)	19
GO_Biological_Process_2018	positive regulation of calcium-mediated signaling (GO:0050850)	19
GO_Biological_Process_2018	negative regulation of leukocyte degranulation (GO:0043301)	19
GO_Biological_Process_2018	positive regulation of calcium ion transport (GO:0051928)	19
GO_Biological_Process_2018	DNA recombinase assembly (GO:0000730)	19
GO_Biological_Process_2018	DNA repair complex assembly (GO:0090735)	19
GO_Biological_Process_2018	double-strand break repair via synthesis-dependent strand annealing (GO:0045003)	19
GO_Biological_Process_2018	histone H2A-K119 monoubiquitination (GO:0036353)	19
GO_Biological_Process_2018	sulfur compound transport (GO:0072348)	19
GO_Biological_Process_2018	regulation of muscle cell differentiation (GO:0051147)	19
GO_Biological_Process_2018	protein deubiquitination (GO:0016579)	19
GO_Biological_Process_2018	regulation of vesicle-mediated transport (GO:0060627)	19
GO_Biological_Process_2018	regulation of mRNA splicing, via spliceosome (GO:0048024)	19
GO_Biological_Process_2018	ceramide biosynthetic process (GO:0046513)	19
GO_Biological_Process_2018	regulation of mitotic cell cycle (GO:0007346)	19
GO_Biological_Process_2018	fructose metabolic process (GO:0006000)	19
GO_Biological_Process_2018	cleavage furrow formation (GO:0036089)	19
GO_Biological_Process_2018	positive regulation of blood vessel endothelial cell migration (GO:0043536)	19
GO_Biological_Process_2018	long term synaptic depression (GO:0060292)	19
GO_Biological_Process_2018	ribonucleoprotein complex assembly (GO:0022618)	19
GO_Biological_Process_2018	excitatory postsynaptic potential (GO:0060079)	19
GO_Biological_Process_2018	chemical synaptic transmission, postsynaptic (GO:0099565)	19
GO_Biological_Process_2018	regulation of postsynaptic membrane potential (GO:0060078)	19
GO_Biological_Process_2018	regulation of early endosome to late endosome transport (GO:2000641)	19
GO_Biological_Process_2018	regulation of type I interferon production (GO:0032479)	19
GO_Biological_Process_2018	regulation of gene expression (GO:0010468)	18
GO_Biological_Process_2018	negative regulation of phosphatase activity (GO:0010923)	18
GO_Biological_Process_2018	regulation of regulatory T cell differentiation (GO:0045589)	18
GO_Biological_Process_2018	negative regulation of macrophage derived foam cell differentiation (GO:0010745)	18
GO_Biological_Process_2018	positive regulation of interleukin-1 beta secretion (GO:0050718)	18
GO_Biological_Process_2018	negative regulation of dendritic cell apoptotic process (GO:2000669)	18
GO_Biological_Process_2018	cellular calcium ion homeostasis (GO:0006874)	18
GO_Biological_Process_2018	positive regulation of protein depolymerization (GO:1901881)	18
GO_Biological_Process_2018	myeloid dendritic cell differentiation (GO:0043011)	18
GO_Biological_Process_2018	negative regulation of sprouting angiogenesis (GO:1903671)	18
GO_Biological_Process_2018	regulation of transcription from RNA polymerase II promoter in response to stress (GO:0043618)	18
GO_Biological_Process_2018	spindle assembly (GO:0051225)	18
GO_Biological_Process_2018	negative regulation of cell migration involved in sprouting angiogenesis (GO:0090051)	18
GO_Biological_Process_2018	cellular response to growth factor stimulus (GO:0071363)	18
GO_Biological_Process_2018	Golgi organization (GO:0007030)	18
GO_Biological_Process_2018	ubiquitin-dependent protein catabolic process via the multivesicular body sorting pathway (GO:0043162)	18
GO_Biological_Process_2018	positive regulation of ubiquitin protein ligase activity (GO:1904668)	18
GO_Biological_Process_2018	photoreceptor cell differentiation (GO:0046530)	18
GO_Biological_Process_2018	positive regulation of extrinsic apoptotic signaling pathway via death domain receptors (GO:1902043)	18
GO_Biological_Process_2018	positive regulation of cardiac muscle cell differentiation (GO:2000727)	18
GO_Biological_Process_2018	response to magnesium ion (GO:0032026)	18
GO_Biological_Process_2018	anaphase-promoting complex-dependent catabolic process (GO:0031145)	18
GO_Biological_Process_2018	cytoplasmic microtubule organization (GO:0031122)	18
GO_Biological_Process_2018	cytoskeletal anchoring at plasma membrane (GO:0007016)	18
GO_Biological_Process_2018	positive regulation of regulated secretory pathway (GO:1903307)	18
GO_Biological_Process_2018	negative regulation of ubiquitin-protein ligase activity involved in mitotic cell cycle (GO:0051436)	18
GO_Biological_Process_2018	catecholamine transport (GO:0051937)	18
GO_Biological_Process_2018	regulation of vascular smooth muscle cell proliferation (GO:1904705)	18
GO_Biological_Process_2018	inhibition of cysteine-type endopeptidase activity (GO:0097340)	18
GO_Biological_Process_2018	regulation of viral genome replication (GO:0045069)	18
GO_Biological_Process_2018	positive regulation of leukocyte degranulation (GO:0043302)	18
GO_Biological_Process_2018	calcium ion transport into cytosol (GO:0060402)	18
GO_Biological_Process_2018	regulation of cell cycle G2/M phase transition (GO:1902749)	18
GO_Biological_Process_2018	lipid transport (GO:0006869)	18
GO_Biological_Process_2018	hemopoiesis (GO:0030097)	17
GO_Biological_Process_2018	positive regulation of interleukin-1 beta production (GO:0032731)	17
GO_Biological_Process_2018	positive regulation of defense response (GO:0031349)	17
GO_Biological_Process_2018	macrophage chemotaxis (GO:0048246)	17
GO_Biological_Process_2018	macrophage migration (GO:1905517)	17
GO_Biological_Process_2018	oxygen homeostasis (GO:0032364)	17
GO_Biological_Process_2018	negative regulation of epithelial to mesenchymal transition (GO:0010719)	17
GO_Biological_Process_2018	negative regulation of necroptotic process (GO:0060546)	17
GO_Biological_Process_2018	T-helper cell lineage commitment (GO:0002295)	17
GO_Biological_Process_2018	leukocyte adhesion to vascular endothelial cell (GO:0061756)	17
GO_Biological_Process_2018	leukocyte tethering or rolling (GO:0050901)	17
GO_Biological_Process_2018	porphyrin-containing compound biosynthetic process (GO:0006779)	17
GO_Biological_Process_2018	heme biosynthetic process (GO:0006783)	17
GO_Biological_Process_2018	negative regulation of membrane protein ectodomain proteolysis (GO:0051045)	17
GO_Biological_Process_2018	calcium ion transmembrane transport (GO:0070588)	17
GO_Biological_Process_2018	mitotic spindle assembly (GO:0090307)	17
GO_Biological_Process_2018	regulation of transcription from RNA polymerase II promoter in response to hypoxia (GO:0061418)	17
GO_Biological_Process_2018	regulation of vesicle fusion (GO:0031338)	17
GO_Biological_Process_2018	response to laminar fluid shear stress (GO:0034616)	17
GO_Biological_Process_2018	negative regulation of pathway-restricted SMAD protein phosphorylation (GO:0060394)	17
GO_Biological_Process_2018	regulation of T cell chemotaxis (GO:0010819)	17
GO_Biological_Process_2018	basement membrane organization (GO:0071711)	17
GO_Biological_Process_2018	DNA synthesis involved in DNA repair (GO:0000731)	17
GO_Biological_Process_2018	ubiquitin-dependent protein catabolic process (GO:0006511)	17
GO_Biological_Process_2018	protection from non-homologous end joining at telomere (GO:0031848)	17
GO_Biological_Process_2018	regulation of transcription involved in cell fate commitment (GO:0060850)	17
GO_Biological_Process_2018	positive regulation of histone acetylation (GO:0035066)	17
GO_Biological_Process_2018	regulation of cation channel activity (GO:2001257)	17
GO_Biological_Process_2018	regulation of alternative mRNA splicing, via spliceosome (GO:0000381)	17
GO_Biological_Process_2018	regulation of ubiquitin-protein ligase activity involved in mitotic cell cycle (GO:0051439)	17
GO_Biological_Process_2018	drug transmembrane transport (GO:0006855)	17
GO_Biological_Process_2018	Wnt signaling pathway involved in midbrain dopaminergic neuron differentiation (GO:1904953)	17
GO_Biological_Process_2018	negative regulation of MAPK cascade (GO:0043409)	17
GO_Biological_Process_2018	extracellular matrix organization (GO:0030198)	17
GO_Biological_Process_2018	negative regulation of cell adhesion (GO:0007162)	17
GO_Biological_Process_2018	cellular response to inorganic substance (GO:0071241)	17
GO_Biological_Process_2018	negative regulation of immune system process (GO:0002683)	16
GO_Biological_Process_2018	negative regulation of defense response (GO:0031348)	16
GO_Biological_Process_2018	intracellular sterol transport (GO:0032366)	16
GO_Biological_Process_2018	neurotransmitter receptor diffusion trapping (GO:0099628)	16
GO_Biological_Process_2018	postsynaptic neurotransmitter receptor diffusion trapping (GO:0098970)	16
GO_Biological_Process_2018	cytoskeleton organization (GO:0007010)	16
GO_Biological_Process_2018	positive regulation of inflammatory response (GO:0050729)	16
GO_Biological_Process_2018	dendritic cell chemotaxis (GO:0002407)	16
GO_Biological_Process_2018	negative regulation of cysteine-type endopeptidase activity (GO:2000117)	16
GO_Biological_Process_2018	calcium ion import (GO:0070509)	16
GO_Biological_Process_2018	T-helper 17 cell differentiation (GO:0072539)	16
GO_Biological_Process_2018	interphase microtubule nucleation by interphase microtubule organizing center (GO:0051415)	16
GO_Biological_Process_2018	negative regulation of blood vessel endothelial cell migration (GO:0043537)	16
GO_Biological_Process_2018	mitochondrial transport (GO:0006839)	16
GO_Biological_Process_2018	amide biosynthetic process (GO:0043604)	16
GO_Biological_Process_2018	positive regulation of actin filament bundle assembly (GO:0032233)	16
GO_Biological_Process_2018	semaphorin-plexin signaling pathway (GO:0071526)	16
GO_Biological_Process_2018	mitotic sister chromatid segregation (GO:0000070)	16
GO_Biological_Process_2018	negative regulation of ubiquitin protein ligase activity (GO:1904667)	16
GO_Biological_Process_2018	negative regulation of oxidative stress-induced cell death (GO:1903202)	16
GO_Biological_Process_2018	positive regulation of SMAD protein import into nucleus (GO:0060391)	16
GO_Biological_Process_2018	regulation of RNA polymerase II transcriptional preinitiation complex assembly (GO:0045898)	16
GO_Biological_Process_2018	cardiac muscle tissue development (GO:0048738)	16
GO_Biological_Process_2018	energy coupled proton transport, down electrochemical gradient (GO:0015985)	16
GO_Biological_Process_2018	negative regulation of intrinsic apoptotic signaling pathway by p53 class mediator (GO:1902254)	16
GO_Biological_Process_2018	positive regulation of myoblast differentiation (GO:0045663)	16
GO_Biological_Process_2018	positive regulation of catecholamine secretion (GO:0033605)	16
GO_Biological_Process_2018	SCF complex assembly (GO:0010265)	16
GO_Biological_Process_2018	response to dopamine (GO:1903350)	16
GO_Biological_Process_2018	cellular response to dopamine (GO:1903351)	16
GO_Biological_Process_2018	lysosome organization (GO:0007040)	16
GO_Biological_Process_2018	inflammatory response (GO:0006954)	15
GO_Biological_Process_2018	divalent metal ion transport (GO:0070838)	15
GO_Biological_Process_2018	positive regulation of CD4-positive, alpha-beta T cell activation (GO:2000516)	15
GO_Biological_Process_2018	negative regulation of cytokine production involved in immune response (GO:0002719)	15
GO_Biological_Process_2018	brain morphogenesis (GO:0048854)	15
GO_Biological_Process_2018	negative regulation of dephosphorylation (GO:0035305)	15
GO_Biological_Process_2018	regulation of striated muscle contraction (GO:0006942)	15
GO_Biological_Process_2018	negative regulation of transcription, DNA-templated (GO:0045892)	15
GO_Biological_Process_2018	response to organic cyclic compound (GO:0014070)	15
GO_Biological_Process_2018	positive regulation of immunoglobulin production (GO:0002639)	15
GO_Biological_Process_2018	establishment of protein localization to vacuole (GO:0072666)	15
GO_Biological_Process_2018	response to growth factor (GO:0070848)	15
GO_Biological_Process_2018	positive regulation of DNA-templated transcription, elongation (GO:0032786)	15
GO_Biological_Process_2018	positive regulation of NF-kappaB transcription factor activity (GO:0051092)	15
GO_Biological_Process_2018	ceramide metabolic process (GO:0006672)	15
GO_Biological_Process_2018	cellular response to increased oxygen levels (GO:0036295)	15
GO_Biological_Process_2018	neurotrophin TRK receptor signaling pathway (GO:0048011)	15
GO_Biological_Process_2018	negative regulation of muscle hypertrophy (GO:0014741)	15
GO_Biological_Process_2018	positive regulation of ubiquitin-protein ligase activity involved in regulation of mitotic cell cycle transition (GO:0051437)	15
GO_Biological_Process_2018	negative regulation of mitotic cell cycle phase transition (GO:1901991)	15
GO_Biological_Process_2018	positive regulation of vascular smooth muscle cell proliferation (GO:1904707)	15
GO_Biological_Process_2018	ESCRT complex disassembly (GO:1904896)	15
GO_Biological_Process_2018	ESCRT III complex disassembly (GO:1904903)	15
GO_Biological_Process_2018	mesodermal cell differentiation (GO:0048333)	15
GO_Biological_Process_2018	negative regulation of homeostatic process (GO:0032845)	15
GO_Biological_Process_2018	positive regulation of nitric-oxide synthase activity (GO:0051000)	15
GO_Biological_Process_2018	molybdopterin cofactor metabolic process (GO:0043545)	15
GO_Biological_Process_2018	molybdopterin cofactor biosynthetic process (GO:0032324)	15
GO_Biological_Process_2018	regulation of cellular response to heat (GO:1900034)	15
GO_Biological_Process_2018	leukotriene biosynthetic process (GO:0019370)	15
GO_Biological_Process_2018	cytoskeletal anchoring at nuclear membrane (GO:0090286)	15
GO_Biological_Process_2018	regulation of protein localization to centrosome (GO:1904779)	15
GO_Biological_Process_2018	RNA secondary structure unwinding (GO:0010501)	15
GO_Biological_Process_2018	regulation of synaptic transmission, dopaminergic (GO:0032225)	15
GO_Biological_Process_2018	positive regulation of T cell differentiation (GO:0045582)	15
GO_Biological_Process_2018	signal complex assembly (GO:0007172)	15
GO_Biological_Process_2018	positive regulation of monooxygenase activity (GO:0032770)	15
GO_Biological_Process_2018	catecholamine metabolic process (GO:0006584)	15
GO_Biological_Process_2018	regulation of telomere capping (GO:1904353)	15
GO_Biological_Process_2018	positive regulation of telomere maintenance via telomere lengthening (GO:1904358)	15
GO_Biological_Process_2018	positive regulation of cell cycle phase transition (GO:1901989)	15
GO_Biological_Process_2018	defense response to Gram-negative bacterium (GO:0050829)	15
GO_Biological_Process_2018	negative regulation of cellular response to hypoxia (GO:1900038)	14
GO_Biological_Process_2018	positive regulation of immune system process (GO:0002684)	14
GO_Biological_Process_2018	cholesterol efflux (GO:0033344)	14
GO_Biological_Process_2018	positive regulation of alpha-beta T cell proliferation (GO:0046641)	14
GO_Biological_Process_2018	activation of cysteine-type endopeptidase activity (GO:0097202)	14
GO_Biological_Process_2018	negative regulation of STAT cascade (GO:1904893)	14
GO_Biological_Process_2018	glycerophospholipid metabolic process (GO:0006650)	14
GO_Biological_Process_2018	phosphatidylinositol biosynthetic process (GO:0006661)	14
GO_Biological_Process_2018	positive regulation of sequence-specific DNA binding transcription factor activity (GO:0051091)	14
GO_Biological_Process_2018	monoterpenoid metabolic process (GO:0016098)	14
GO_Biological_Process_2018	strand displacement (GO:0000732)	14
GO_Biological_Process_2018	DNA biosynthetic process (GO:0071897)	14
GO_Biological_Process_2018	cellular potassium ion homeostasis (GO:0030007)	14
GO_Biological_Process_2018	positive regulation of T cell migration (GO:2000406)	14
GO_Biological_Process_2018	regulation of cellular ketone metabolic process (GO:0010565)	14
GO_Biological_Process_2018	negative regulation of protein kinase B signaling (GO:0051898)	14
GO_Biological_Process_2018	response to sterol (GO:0036314)	14
GO_Biological_Process_2018	mitotic spindle elongation (GO:0000022)	14
GO_Biological_Process_2018	regulation of cellular amine metabolic process (GO:0033238)	14
GO_Biological_Process_2018	regulation of cellular amino acid metabolic process (GO:0006521)	14
GO_Biological_Process_2018	regulation of glycoprotein biosynthetic process (GO:0010559)	14
GO_Biological_Process_2018	tetrahydrofolate interconversion (GO:0035999)	14
GO_Biological_Process_2018	polyol metabolic process (GO:0019751)	14
GO_Biological_Process_2018	inositol phosphate metabolic process (GO:0043647)	14
GO_Biological_Process_2018	DNA metabolic process (GO:0006259)	14
GO_Biological_Process_2018	intra-Golgi vesicle-mediated transport (GO:0006891)	14
GO_Biological_Process_2018	sulfur amino acid biosynthetic process (GO:0000097)	14
GO_Biological_Process_2018	triglyceride-rich lipoprotein particle remodeling (GO:0034370)	14
GO_Biological_Process_2018	potassium ion transport (GO:0006813)	14
GO_Biological_Process_2018	regulation of tissue remodeling (GO:0034103)	14
GO_Biological_Process_2018	acute-phase response (GO:0006953)	14
GO_Biological_Process_2018	cellular response to lipid (GO:0071396)	14
GO_Biological_Process_2018	regulation of transcription, DNA-templated (GO:0006355)	13
GO_Biological_Process_2018	regulation of cholesterol transport (GO:0032374)	13
GO_Biological_Process_2018	cellular response to transforming growth factor beta stimulus (GO:0071560)	13
GO_Biological_Process_2018	regulation of dendritic cell differentiation (GO:2001198)	13
GO_Biological_Process_2018	negative regulation of MAP kinase activity (GO:0043407)	13
GO_Biological_Process_2018	regulation of calcium ion transport (GO:0051924)	13
GO_Biological_Process_2018	protein transmembrane import into intracellular organelle (GO:0044743)	13
GO_Biological_Process_2018	negative regulation of transcription from RNA polymerase II promoter (GO:0000122)	13
GO_Biological_Process_2018	amyloid precursor protein catabolic process (GO:0042987)	13
GO_Biological_Process_2018	adherens junction assembly (GO:0034333)	13
GO_Biological_Process_2018	negative regulation of cellular protein localization (GO:1903828)	13
GO_Biological_Process_2018	glycerophospholipid biosynthetic process (GO:0046474)	13
GO_Biological_Process_2018	negative regulation of RIG-I signaling pathway (GO:0039536)	13
GO_Biological_Process_2018	negative regulation of glial cell apoptotic process (GO:0034351)	13
GO_Biological_Process_2018	negative regulation of transforming growth factor beta receptor signaling pathway (GO:0030512)	13
GO_Biological_Process_2018	positive regulation of cell adhesion mediated by integrin (GO:0033630)	13
GO_Biological_Process_2018	dicarboxylic acid catabolic process (GO:0043649)	13
GO_Biological_Process_2018	regulation of SMAD protein import into nucleus (GO:0060390)	13
GO_Biological_Process_2018	positive regulation of phosphatidylinositol 3-kinase signaling (GO:0014068)	13
GO_Biological_Process_2018	protein complex subunit organization (GO:0071822)	13
GO_Biological_Process_2018	positive regulation of protein ubiquitination involved in ubiquitin-dependent protein catabolic process (GO:2000060)	13
GO_Biological_Process_2018	positive regulation of neurological system process (GO:0031646)	13
GO_Biological_Process_2018	phosphate-containing compound metabolic process (GO:0006796)	13
GO_Biological_Process_2018	viral translation (GO:0019081)	13
GO_Biological_Process_2018	positive regulation of insulin-like growth factor receptor signaling pathway (GO:0043568)	13
GO_Biological_Process_2018	regulation of insulin-like growth factor receptor signaling pathway (GO:0043567)	13
GO_Biological_Process_2018	cell-cell junction maintenance (GO:0045217)	13
GO_Biological_Process_2018	import across plasma membrane (GO:0098739)	13
GO_Biological_Process_2018	regulation of MHC class II biosynthetic process (GO:0045346)	13
GO_Biological_Process_2018	hydrogen ion transmembrane transport (GO:1902600)	13
GO_Biological_Process_2018	positive regulation of tumor necrosis factor production (GO:0032760)	13
GO_Biological_Process_2018	cell junction maintenance (GO:0034331)	13
GO_Biological_Process_2018	metanephros development (GO:0001656)	13
GO_Biological_Process_2018	regulation of nucleic acid-templated transcription (GO:1903506)	12
GO_Biological_Process_2018	COPII-coated vesicle budding (GO:0090114)	12
GO_Biological_Process_2018	COPII vesicle coating (GO:0048208)	12
GO_Biological_Process_2018	vesicle targeting, rough ER to cis-Golgi (GO:0048207)	12
GO_Biological_Process_2018	vesicle coating (GO:0006901)	12
GO_Biological_Process_2018	cellular response to prostaglandin stimulus (GO:0071379)	12
GO_Biological_Process_2018	negative regulation of inflammatory response (GO:0050728)	12
GO_Biological_Process_2018	membrane raft organization (GO:0031579)	12
GO_Biological_Process_2018	cellular response to cytokine stimulus (GO:0071345)	12
GO_Biological_Process_2018	cellular response to interferon-gamma (GO:0071346)	12
GO_Biological_Process_2018	ATP synthesis coupled electron transport (GO:0042773)	12
GO_Biological_Process_2018	regulation of intracellular pH (GO:0051453)	12
GO_Biological_Process_2018	neurotransmitter receptor transport, postsynaptic endosome to lysosome (GO:0098943)	12
GO_Biological_Process_2018	cellular response to UV-B (GO:0071493)	12
GO_Biological_Process_2018	cytoskeleton-dependent cytokinesis (GO:0061640)	12
GO_Biological_Process_2018	negative regulation of peptidyl-tyrosine phosphorylation (GO:0050732)	12
GO_Biological_Process_2018	positive regulation of dendritic cell chemotaxis (GO:2000510)	12
GO_Biological_Process_2018	terpenoid metabolic process (GO:0006721)	12
GO_Biological_Process_2018	myoblast differentiation (GO:0045445)	12
GO_Biological_Process_2018	regulation of cellular catabolic process (GO:0031329)	12
GO_Biological_Process_2018	small GTPase mediated signal transduction (GO:0007264)	12
GO_Biological_Process_2018	positive regulation of branching involved in ureteric bud morphogenesis (GO:0090190)	12
GO_Biological_Process_2018	multivesicular body organization (GO:0036257)	12
GO_Biological_Process_2018	endothelial cell differentiation (GO:0045446)	12
GO_Biological_Process_2018	T-helper cell differentiation (GO:0042093)	12
GO_Biological_Process_2018	cellular response to organic cyclic compound (GO:0071407)	12
GO_Biological_Process_2018	intracellular lipid transport (GO:0032365)	12
GO_Biological_Process_2018	regulation of muscle contraction (GO:0006937)	12
GO_Biological_Process_2018	regulation of transcription from RNA polymerase II promoter (GO:0006357)	12
GO_Biological_Process_2018	negative regulation of immune effector process (GO:0002698)	12
GO_Biological_Process_2018	positive regulation of bone remodeling (GO:0046852)	12
GO_Biological_Process_2018	positive regulation of bone resorption (GO:0045780)	12
GO_Biological_Process_2018	glucocorticoid metabolic process (GO:0008211)	12
GO_Biological_Process_2018	IRES-dependent viral translational initiation (GO:0075522)	12
GO_Biological_Process_2018	positive regulation of protein localization to centrosome (GO:1904781)	12
GO_Biological_Process_2018	regulation of interleukin-6 production (GO:0032675)	12
GO_Biological_Process_2018	regulation of mitotic cell cycle spindle assembly checkpoint (GO:0090266)	12
GO_Biological_Process_2018	protein localization to nuclear envelope (GO:0090435)	12
GO_Biological_Process_2018	regulation of interleukin-17 production (GO:0032660)	12
GO_Biological_Process_2018	spermatid development (GO:0007286)	12
GO_Biological_Process_2018	positive regulation of cytokine secretion (GO:0050715)	12
GO_Biological_Process_2018	lipid biosynthetic process (GO:0008610)	12
GO_Biological_Process_2018	antimicrobial humoral immune response mediated by antimicrobial peptide (GO:0061844)	12
GO_Biological_Process_2018	regulation of release of cytochrome c from mitochondria (GO:0090199)	12
GO_Biological_Process_2018	actin cytoskeleton reorganization (GO:0031532)	12
GO_Biological_Process_2018	skeletal muscle organ development (GO:0060538)	11
GO_Biological_Process_2018	positive regulation of epithelial cell proliferation (GO:0050679)	11
GO_Biological_Process_2018	regulation of blood vessel endothelial cell migration (GO:0043535)	11
GO_Biological_Process_2018	regulation of dopamine receptor signaling pathway (GO:0060159)	11
GO_Biological_Process_2018	protein monoubiquitination (GO:0006513)	11
GO_Biological_Process_2018	striated muscle contraction (GO:0006941)	11
GO_Biological_Process_2018	negative regulation of B cell proliferation (GO:0030889)	11
GO_Biological_Process_2018	regulation of dendritic cell apoptotic process (GO:2000668)	11
GO_Biological_Process_2018	positive regulation of mRNA processing (GO:0050685)	11
GO_Biological_Process_2018	protein processing (GO:0016485)	11
GO_Biological_Process_2018	actin filament-based transport (GO:0099515)	11
GO_Biological_Process_2018	mitotic spindle organization (GO:0007052)	11
GO_Biological_Process_2018	Notch receptor processing, ligand-dependent (GO:0035333)	11
GO_Biological_Process_2018	negative regulation of heterotypic cell-cell adhesion (GO:0034115)	11
GO_Biological_Process_2018	regulation of cell-cell adhesion involved in gastrulation (GO:0070587)	11
GO_Biological_Process_2018	positive regulation of calcineurin-NFAT signaling cascade (GO:0070886)	11
GO_Biological_Process_2018	regulation of membrane depolarization (GO:0003254)	11
GO_Biological_Process_2018	mitochondrial calcium ion transmembrane transport (GO:0006851)	11
GO_Biological_Process_2018	regulation of phosphatidylinositol 3-kinase signaling (GO:0014066)	11
GO_Biological_Process_2018	SCF-dependent proteasomal ubiquitin-dependent protein catabolic process (GO:0031146)	11
GO_Biological_Process_2018	positive regulation of protein kinase activity (GO:0045860)	11
GO_Biological_Process_2018	negative regulation of cellular response to transforming growth factor beta stimulus (GO:1903845)	11
GO_Biological_Process_2018	RNA export from nucleus (GO:0006405)	11
GO_Biological_Process_2018	cellular response to DNA damage stimulus (GO:0006974)	11
GO_Biological_Process_2018	negative regulation of G2/M transition of mitotic cell cycle (GO:0010972)	11
GO_Biological_Process_2018	heterocycle biosynthetic process (GO:0018130)	11
GO_Biological_Process_2018	positive regulation of cardiocyte differentiation (GO:1905209)	11
GO_Biological_Process_2018	cellular hyperosmotic response (GO:0071474)	11
GO_Biological_Process_2018	regulation of t-circle formation (GO:1904429)	11
GO_Biological_Process_2018	positive regulation of embryonic development (GO:0040019)	11
GO_Biological_Process_2018	phosphate ion homeostasis (GO:0055062)	11
GO_Biological_Process_2018	anatomical structure homeostasis (GO:0060249)	11
GO_Biological_Process_2018	positive regulation of protein modification process (GO:0031401)	11
GO_Biological_Process_2018	negative regulation of telomere maintenance via telomere lengthening (GO:1904357)	11
GO_Biological_Process_2018	negative regulation of protein kinase activity (GO:0006469)	11
GO_Biological_Process_2018	negative regulation of double-strand break repair (GO:2000780)	11
GO_Biological_Process_2018	response to ionizing radiation (GO:0010212)	11
GO_Biological_Process_2018	lipid catabolic process (GO:0016042)	10
GO_Biological_Process_2018	amide transport (GO:0042886)	10
GO_Biological_Process_2018	negative regulation of hydrogen peroxide-induced cell death (GO:1903206)	10
GO_Biological_Process_2018	regulation of immunoglobulin mediated immune response (GO:0002889)	10
GO_Biological_Process_2018	lens fiber cell development (GO:0070307)	10
GO_Biological_Process_2018	RNA interference (GO:0016246)	10
GO_Biological_Process_2018	negative regulation of calcium ion transport (GO:0051926)	10
GO_Biological_Process_2018	negative regulation of interleukin-1 beta production (GO:0032691)	10
GO_Biological_Process_2018	mitochondrion distribution (GO:0048311)	10
GO_Biological_Process_2018	transcription from RNA polymerase II promoter (GO:0006366)	10
GO_Biological_Process_2018	cranial nerve development (GO:0021545)	10
GO_Biological_Process_2018	regulation of cardiac muscle cell action potential (GO:0098901)	10
GO_Biological_Process_2018	organelle assembly (GO:0070925)	10
GO_Biological_Process_2018	regulation of protein localization to nucleus (GO:1900180)	10
GO_Biological_Process_2018	negative regulation of ion transport (GO:0043271)	10
GO_Biological_Process_2018	signal peptide processing (GO:0006465)	10
GO_Biological_Process_2018	beta-catenin-TCF complex assembly (GO:1904837)	10
GO_Biological_Process_2018	negative regulation of ATP metabolic process (GO:1903579)	10
GO_Biological_Process_2018	ER to Golgi vesicle-mediated transport (GO:0006888)	10
GO_Biological_Process_2018	regulation of transmembrane transport (GO:0034762)	10
GO_Biological_Process_2018	regulation of endodeoxyribonuclease activity (GO:0032071)	10
GO_Biological_Process_2018	cellular copper ion homeostasis (GO:0006878)	10
GO_Biological_Process_2018	regulation of Notch signaling pathway (GO:0008593)	10
GO_Biological_Process_2018	pyruvate metabolic process (GO:0006090)	10
GO_Biological_Process_2018	regulation of adaptive immune response (GO:0002819)	10
GO_Biological_Process_2018	positive regulation of catalytic activity (GO:0043085)	10
GO_Biological_Process_2018	regulation of cellular pH (GO:0030641)	10
GO_Biological_Process_2018	nucleotide-excision repair, DNA incision, 5'-to lesion (GO:0006296)	10
GO_Biological_Process_2018	regulation of myeloid cell differentiation (GO:0045637)	10
GO_Biological_Process_2018	positive regulation of muscle cell differentiation (GO:0051149)	10
GO_Biological_Process_2018	cellular response to peptide (GO:1901653)	10
GO_Biological_Process_2018	response to lipoteichoic acid (GO:0070391)	10
GO_Biological_Process_2018	cellular response to lipoteichoic acid (GO:0071223)	10
GO_Biological_Process_2018	monovalent inorganic anion homeostasis (GO:0055083)	10
GO_Biological_Process_2018	positive regulation of protein kinase A signaling (GO:0010739)	10
GO_Biological_Process_2018	nucleoside metabolic process (GO:0009116)	10
GO_Biological_Process_2018	negative regulation of chemokine production (GO:0032682)	10
GO_Biological_Process_2018	negative regulation of macroautophagy (GO:0016242)	10
GO_Biological_Process_2018	sulfur amino acid metabolic process (GO:0000096)	10
GO_Biological_Process_2018	transcription initiation from RNA polymerase III promoter (GO:0006384)	10
GO_Biological_Process_2018	mitotic cell cycle phase transition (GO:0044772)	10
GO_Biological_Process_2018	positive regulation of endothelial cell proliferation (GO:0001938)	9
GO_Biological_Process_2018	amyloid precursor protein metabolic process (GO:0042982)	9
GO_Biological_Process_2018	negative regulation of neuron apoptotic process (GO:0043524)	9
GO_Biological_Process_2018	cell wall macromolecule catabolic process (GO:0016998)	9
GO_Biological_Process_2018	sensory perception of light stimulus (GO:0050953)	9
GO_Biological_Process_2018	mitotic nuclear envelope reassembly (GO:0007084)	9
GO_Biological_Process_2018	sodium ion transmembrane transport (GO:0035725)	9
GO_Biological_Process_2018	stress granule assembly (GO:0034063)	9
GO_Biological_Process_2018	detection of chemical stimulus involved in sensory perception (GO:0050907)	9
GO_Biological_Process_2018	L-alanine transport (GO:0015808)	9
GO_Biological_Process_2018	protein import into mitochondrial matrix (GO:0030150)	9
GO_Biological_Process_2018	monocyte activation (GO:0042117)	9
GO_Biological_Process_2018	hexose metabolic process (GO:0019318)	9
GO_Biological_Process_2018	monocarboxylic acid transport (GO:0015718)	9
GO_Biological_Process_2018	negative regulation of Wnt signaling pathway (GO:0030178)	9
GO_Biological_Process_2018	regulation of JAK-STAT cascade (GO:0046425)	9
GO_Biological_Process_2018	regulation of mitotic cell cycle phase transition (GO:1901990)	9
GO_Biological_Process_2018	protein localization to plasma membrane (GO:0072659)	9
GO_Biological_Process_2018	positive regulation of interleukin-1 secretion (GO:0050716)	9
GO_Biological_Process_2018	positive regulation of mononuclear cell migration (GO:0071677)	9
GO_Biological_Process_2018	DNA dealkylation involved in DNA repair (GO:0006307)	9
GO_Biological_Process_2018	DNA dealkylation (GO:0035510)	9
GO_Biological_Process_2018	positive regulation of response to external stimulus (GO:0032103)	9
GO_Biological_Process_2018	cellular response to virus (GO:0098586)	9
GO_Biological_Process_2018	regulation of pri-miRNA transcription from RNA polymerase II promoter (GO:1902893)	9
GO_Biological_Process_2018	interstrand cross-link repair (GO:0036297)	9
GO_Biological_Process_2018	membrane depolarization during action potential (GO:0086010)	9
GO_Biological_Process_2018	DNA repair (GO:0006281)	9
GO_Biological_Process_2018	ruffle organization (GO:0031529)	9
GO_Biological_Process_2018	negative regulation of lipid storage (GO:0010888)	9
GO_Biological_Process_2018	regulation of extracellular matrix organization (GO:1903053)	9
GO_Biological_Process_2018	tumor necrosis factor-mediated signaling pathway (GO:0033209)	9
GO_Biological_Process_2018	regulation of smooth muscle cell migration (GO:0014910)	9
GO_Biological_Process_2018	microtubule nucleation (GO:0007020)	9
GO_Biological_Process_2018	kinetochore organization (GO:0051383)	9
GO_Biological_Process_2018	L-serine metabolic process (GO:0006563)	9
GO_Biological_Process_2018	peptidyl-serine modification (GO:0018209)	9
GO_Biological_Process_2018	negative regulation of appetite (GO:0032099)	9
GO_Biological_Process_2018	regulation of phagocytosis (GO:0050764)	9
GO_Biological_Process_2018	positive regulation of myeloid leukocyte mediated immunity (GO:0002888)	9
GO_Biological_Process_2018	glycerolipid metabolic process (GO:0046486)	9
GO_Biological_Process_2018	regulation of interleukin-1 beta production (GO:0032651)	9
GO_Biological_Process_2018	peptide transport (GO:0015833)	9
GO_Biological_Process_2018	regulation of sodium ion transport (GO:0002028)	9
GO_Biological_Process_2018	organophosphate ester transport (GO:0015748)	9
GO_Biological_Process_2018	necroptotic process (GO:0070266)	9
GO_Biological_Process_2018	adaptive immune response based on somatic recombination of immune receptors built from immunoglobulin superfamily domains (GO:0002460)	9
GO_Biological_Process_2018	lytic vacuole organization (GO:0080171)	9
GO_Biological_Process_2018	cellular response to fibroblast growth factor stimulus (GO:0044344)	9
GO_Biological_Process_2018	tRNA aminoacylation for mitochondrial protein translation (GO:0070127)	9
GO_Biological_Process_2018	response to hydroperoxide (GO:0033194)	9
GO_Biological_Process_2018	positive regulation of viral entry into host cell (GO:0046598)	9
GO_Biological_Process_2018	negative regulation of cAMP-mediated signaling (GO:0043951)	9
GO_Biological_Process_2018	insulin-like growth factor receptor signaling pathway (GO:0048009)	9
GO_Biological_Process_2018	nuclear envelope organization (GO:0006998)	9
GO_Biological_Process_2018	regulation of cellular macromolecule biosynthetic process (GO:2000112)	8
GO_Biological_Process_2018	regulation of neuron apoptotic process (GO:0043523)	8
GO_Biological_Process_2018	stabilization of membrane potential (GO:0030322)	8
GO_Biological_Process_2018	negative regulation of response to external stimulus (GO:0032102)	8
GO_Biological_Process_2018	regulation of nitric-oxide synthase activity (GO:0050999)	8
GO_Biological_Process_2018	phospholipid efflux (GO:0033700)	8
GO_Biological_Process_2018	positive regulation of potassium ion transmembrane transporter activity (GO:1901018)	8
GO_Biological_Process_2018	positive regulation of ERAD pathway (GO:1904294)	8
GO_Biological_Process_2018	cyclic-nucleotide-mediated signaling (GO:0019935)	8
GO_Biological_Process_2018	exocyst localization (GO:0051601)	8
GO_Biological_Process_2018	positive regulation of potassium ion transmembrane transport (GO:1901381)	8
GO_Biological_Process_2018	negative regulation of cytokine production (GO:0001818)	8
GO_Biological_Process_2018	negative regulation of response to stimulus (GO:0048585)	8
GO_Biological_Process_2018	G-protein coupled acetylcholine receptor signaling pathway (GO:0007213)	8
GO_Biological_Process_2018	amino acid transport (GO:0006865)	8
GO_Biological_Process_2018	carboxylic acid transmembrane transport (GO:1905039)	8
GO_Biological_Process_2018	regulation of dephosphorylation (GO:0035303)	8
GO_Biological_Process_2018	ion transport (GO:0006811)	8
GO_Biological_Process_2018	extrinsic apoptotic signaling pathway (GO:0097191)	8
GO_Biological_Process_2018	response to interferon-alpha (GO:0035455)	8
GO_Biological_Process_2018	positive regulation of stem cell proliferation (GO:2000648)	8
GO_Biological_Process_2018	regulation of interleukin-4 production (GO:0032673)	8
GO_Biological_Process_2018	detection of bacterium (GO:0016045)	8
GO_Biological_Process_2018	negative regulation of ossification (GO:0030279)	8
GO_Biological_Process_2018	negative regulation of tyrosine phosphorylation of STAT protein (GO:0042532)	8
GO_Biological_Process_2018	response to alkaloid (GO:0043279)	8
GO_Biological_Process_2018	regulation of smooth muscle cell proliferation (GO:0048660)	8
GO_Biological_Process_2018	sensory perception (GO:0007600)	8
GO_Biological_Process_2018	positive regulation of cytoskeleton organization (GO:0051495)	8
GO_Biological_Process_2018	cell differentiation in hindbrain (GO:0021533)	8
GO_Biological_Process_2018	cytokine-mediated signaling pathway (GO:0019221)	8
GO_Biological_Process_2018	regulation of calcium ion-dependent exocytosis (GO:0017158)	8
GO_Biological_Process_2018	regulation of intrinsic apoptotic signaling pathway in response to DNA damage by p53 class mediator (GO:1902165)	8
GO_Biological_Process_2018	endodermal cell differentiation (GO:0035987)	8
GO_Biological_Process_2018	protein polyubiquitination (GO:0000209)	8
GO_Biological_Process_2018	protein dephosphorylation (GO:0006470)	8
GO_Biological_Process_2018	wound healing (GO:0042060)	8
GO_Biological_Process_2018	cellular response to low-density lipoprotein particle stimulus (GO:0071404)	8
GO_Biological_Process_2018	drug transport (GO:0015893)	8
GO_Biological_Process_2018	covalent chromatin modification (GO:0016569)	8
GO_Biological_Process_2018	response to estradiol (GO:0032355)	8
GO_Biological_Process_2018	positive regulation of transcription from RNA polymerase II promoter in response to endoplasmic reticulum stress (GO:1990440)	8
GO_Biological_Process_2018	regulation of T cell proliferation (GO:0042129)	8
GO_Biological_Process_2018	high-density lipoprotein particle remodeling (GO:0034375)	8
GO_Biological_Process_2018	reverse cholesterol transport (GO:0043691)	8
GO_Biological_Process_2018	potassium ion import (GO:0010107)	8
GO_Biological_Process_2018	potassium ion homeostasis (GO:0055075)	8
GO_Biological_Process_2018	epithelial cell differentiation (GO:0030855)	8
GO_Biological_Process_2018	regulation of organelle organization (GO:0033043)	8
GO_Biological_Process_2018	regulation of epithelial cell migration (GO:0010632)	8
GO_Biological_Process_2018	regulation of cholesterol homeostasis (GO:2000188)	8
GO_Biological_Process_2018	positive regulation of fatty acid metabolic process (GO:0045923)	8
GO_Biological_Process_2018	hexose transport (GO:0008645)	8
GO_Biological_Process_2018	regulation of memory T cell differentiation (GO:0043380)	8
GO_Biological_Process_2018	regulation of hydrogen peroxide metabolic process (GO:0010310)	8
GO_Biological_Process_2018	telomere organization (GO:0032200)	8
GO_Biological_Process_2018	positive regulation of fertilization (GO:1905516)	8
GO_Biological_Process_2018	TORC1 signaling (GO:0038202)	8
GO_Biological_Process_2018	prostanoid biosynthetic process (GO:0046457)	8
GO_Biological_Process_2018	defense response to Gram-positive bacterium (GO:0050830)	8
GO_Biological_Process_2018	membrane disruption in other organism (GO:0051673)	8
GO_Biological_Process_2018	positive regulation of phosphatase activity (GO:0010922)	8
GO_Biological_Process_2018	positive regulation of B cell differentiation (GO:0045579)	8
GO_Biological_Process_2018	pharyngeal system development (GO:0060037)	8
GO_Biological_Process_2018	peptidyl-serine dephosphorylation (GO:0070262)	8
GO_Biological_Process_2018	cell-substrate adherens junction assembly (GO:0007045)	8
GO_Biological_Process_2018	focal adhesion assembly (GO:0048041)	8
GO_Biological_Process_2018	regulation of telomere maintenance via telomerase (GO:0032210)	8
GO_Biological_Process_2018	regulation of actin filament depolymerization (GO:0030834)	8
GO_Biological_Process_2018	regulation of glucokinase activity (GO:0033131)	8
GO_Biological_Process_2018	regulation of calcium ion import (GO:0090279)	8
GO_Biological_Process_2018	proteolysis (GO:0006508)	8
GO_Biological_Process_2018	positive regulation of DNA biosynthetic process (GO:2000573)	8
GO_Biological_Process_2018	regulation of cardiac conduction (GO:1903779)	7
GO_Biological_Process_2018	positive regulation of epidermis development (GO:0045684)	7
GO_Biological_Process_2018	myelination (GO:0042552)	7
GO_Biological_Process_2018	regulation of mRNA 3'-end processing (GO:0031440)	7
GO_Biological_Process_2018	negative regulation of protein tyrosine kinase activity (GO:0061099)	7
GO_Biological_Process_2018	negative regulation of sequence-specific DNA binding transcription factor activity (GO:0043433)	7
GO_Biological_Process_2018	positive regulation of lymphocyte migration (GO:2000403)	7
GO_Biological_Process_2018	protein trimerization (GO:0070206)	7
GO_Biological_Process_2018	nuclear envelope reassembly (GO:0031468)	7
GO_Biological_Process_2018	synaptic vesicle recycling (GO:0036465)	7
GO_Biological_Process_2018	galactosylceramide metabolic process (GO:0006681)	7
GO_Biological_Process_2018	positive regulation of humoral immune response (GO:0002922)	7
GO_Biological_Process_2018	citrate metabolic process (GO:0006101)	7
GO_Biological_Process_2018	relaxation of cardiac muscle (GO:0055119)	7
GO_Biological_Process_2018	dendritic cell differentiation (GO:0097028)	7
GO_Biological_Process_2018	chemical homeostasis (GO:0048878)	7
GO_Biological_Process_2018	defense response to fungus (GO:0050832)	7
GO_Biological_Process_2018	positive regulation of transcription from RNA polymerase II promoter (GO:0045944)	7
GO_Biological_Process_2018	anion transport (GO:0006820)	7
GO_Biological_Process_2018	vesicle-mediated transport in synapse (GO:0099003)	7
GO_Biological_Process_2018	calcium ion import into cytosol (GO:1902656)	7
GO_Biological_Process_2018	calcium ion import across plasma membrane (GO:0098703)	7
GO_Biological_Process_2018	outflow tract septum morphogenesis (GO:0003148)	7
GO_Biological_Process_2018	striated muscle cell development (GO:0055002)	7
GO_Biological_Process_2018	negative regulation of angiogenesis (GO:0016525)	7
GO_Biological_Process_2018	beta-catenin destruction complex disassembly (GO:1904886)	7
GO_Biological_Process_2018	positive regulation of cell migration (GO:0030335)	7
GO_Biological_Process_2018	regulation of branching involved in ureteric bud morphogenesis (GO:0090189)	7
GO_Biological_Process_2018	positive regulation of axonogenesis (GO:0050772)	7
GO_Biological_Process_2018	positive regulation of morphogenesis of an epithelium (GO:1905332)	7
GO_Biological_Process_2018	sulfur compound biosynthetic process (GO:0044272)	7
GO_Biological_Process_2018	positive regulation of protein import into nucleus (GO:0042307)	7
GO_Biological_Process_2018	heart contraction (GO:0060047)	7
GO_Biological_Process_2018	nucleotide-excision repair, preincision complex assembly (GO:0006294)	7
GO_Biological_Process_2018	response to nutrient levels (GO:0031667)	7
GO_Biological_Process_2018	sterol metabolic process (GO:0016125)	7
GO_Biological_Process_2018	nucleocytoplasmic transport (GO:0006913)	7
GO_Biological_Process_2018	mRNA-containing ribonucleoprotein complex export from nucleus (GO:0071427)	7
GO_Biological_Process_2018	oogenesis (GO:0048477)	7
GO_Biological_Process_2018	cytoplasmic mRNA processing body assembly (GO:0033962)	7
GO_Biological_Process_2018	cellular monovalent inorganic cation homeostasis (GO:0030004)	7
GO_Biological_Process_2018	negative regulation of cell cycle (GO:0045786)	7
GO_Biological_Process_2018	stem cell differentiation (GO:0048863)	7
GO_Biological_Process_2018	positive regulation of angiogenesis (GO:0045766)	7
GO_Biological_Process_2018	heart development (GO:0007507)	7
GO_Biological_Process_2018	positive regulation of stem cell differentiation (GO:2000738)	7
GO_Biological_Process_2018	regulation of interleukin-1 beta secretion (GO:0050706)	7
GO_Biological_Process_2018	cytochrome complex assembly (GO:0017004)	7
GO_Biological_Process_2018	intracellular steroid hormone receptor signaling pathway (GO:0030518)	7
GO_Biological_Process_2018	positive regulation of DNA replication (GO:0045740)	7
GO_Biological_Process_2018	glucose homeostasis (GO:0042593)	7
GO_Biological_Process_2018	establishment of protein localization to mitochondrial membrane (GO:0090151)	7
GO_Biological_Process_2018	regulation of muscle system process (GO:0090257)	7
GO_Biological_Process_2018	monosaccharide transport (GO:0015749)	7
GO_Biological_Process_2018	cellular response to mechanical stimulus (GO:0071260)	7
GO_Biological_Process_2018	regulation of double-strand break repair (GO:2000779)	7
GO_Biological_Process_2018	innate immune response in mucosa (GO:0002227)	7
GO_Biological_Process_2018	positive regulation of cholesterol storage (GO:0010886)	7
GO_Biological_Process_2018	regulation of protein modification process (GO:0031399)	7
GO_Biological_Process_2018	positive regulation of mitotic cell cycle phase transition (GO:1901992)	7
GO_Biological_Process_2018	tRNA aminoacylation for protein translation (GO:0006418)	7
GO_Biological_Process_2018	cardiac right ventricle morphogenesis (GO:0003215)	7
GO_Biological_Process_2018	bone development (GO:0060348)	7
GO_Biological_Process_2018	positive regulation by host of viral transcription (GO:0043923)	7
GO_Biological_Process_2018	negative regulation of leukocyte activation (GO:0002695)	7
GO_Biological_Process_2018	positive regulation of TOR signaling (GO:0032008)	7
GO_Biological_Process_2018	smooth muscle cell differentiation (GO:0051145)	7
GO_Biological_Process_2018	cellular response to glucose starvation (GO:0042149)	7
GO_Biological_Process_2018	DNA replication (GO:0006260)	7
GO_Biological_Process_2018	regulation of lipid biosynthetic process (GO:0046890)	7
GO_Biological_Process_2018	mRNA transcription from RNA polymerase II promoter (GO:0042789)	6
GO_Biological_Process_2018	negative regulation of NF-kappaB transcription factor activity (GO:0032088)	6
GO_Biological_Process_2018	regulation of neuron death (GO:1901214)	6
GO_Biological_Process_2018	negative regulation of growth (GO:0045926)	6
GO_Biological_Process_2018	DNA-templated transcription, initiation (GO:0006352)	6
GO_Biological_Process_2018	regulation of spindle assembly (GO:0090169)	6
GO_Biological_Process_2018	cytoskeleton-dependent intracellular transport (GO:0030705)	6
GO_Biological_Process_2018	regulation of blood vessel diameter (GO:0097746)	6
GO_Biological_Process_2018	positive regulation of glycoprotein biosynthetic process (GO:0010560)	6
GO_Biological_Process_2018	immunological synapse formation (GO:0001771)	6
GO_Biological_Process_2018	negative regulation of cellular macromolecule biosynthetic process (GO:2000113)	6
GO_Biological_Process_2018	platelet degranulation (GO:0002576)	6
GO_Biological_Process_2018	positive regulation of T-helper 2 cell differentiation (GO:0045630)	6
GO_Biological_Process_2018	T-helper 17 cell lineage commitment (GO:0072540)	6
GO_Biological_Process_2018	cardiac muscle contraction (GO:0060048)	6
GO_Biological_Process_2018	protein localization to membrane (GO:0072657)	6
GO_Biological_Process_2018	low-density lipoprotein particle remodeling (GO:0034374)	6
GO_Biological_Process_2018	toll-like receptor signaling pathway (GO:0002224)	6
GO_Biological_Process_2018	cell migration involved in heart development (GO:0060973)	6
GO_Biological_Process_2018	negative regulation of DNA repair (GO:0045738)	6
GO_Biological_Process_2018	positive regulation of intracellular estrogen receptor signaling pathway (GO:0033148)	6
GO_Biological_Process_2018	negative regulation of multicellular organismal process (GO:0051241)	6
GO_Biological_Process_2018	cellular response to acid chemical (GO:0071229)	6
GO_Biological_Process_2018	positive regulation of interleukin-10 production (GO:0032733)	6
GO_Biological_Process_2018	positive regulation of protein exit from endoplasmic reticulum (GO:0070863)	6
GO_Biological_Process_2018	regulation of interleukin-10 production (GO:0032653)	6
GO_Biological_Process_2018	negative regulation of leukocyte apoptotic process (GO:2000107)	6
GO_Biological_Process_2018	regulation of JNK cascade (GO:0046328)	6
GO_Biological_Process_2018	nose development (GO:0043584)	6
GO_Biological_Process_2018	lysosome localization (GO:0032418)	6
GO_Biological_Process_2018	positive regulation of autophagosome maturation (GO:1901098)	6
GO_Biological_Process_2018	positive regulation of acrosome reaction (GO:2000344)	6
GO_Biological_Process_2018	multivesicular body assembly (GO:0036258)	6
GO_Biological_Process_2018	regulation of autophagosome maturation (GO:1901096)	6
GO_Biological_Process_2018	positive regulation of leukocyte chemotaxis (GO:0002690)	6
GO_Biological_Process_2018	organic cation transport (GO:0015695)	6
GO_Biological_Process_2018	nucleus organization (GO:0006997)	6
GO_Biological_Process_2018	negative regulation of mitotic nuclear division (GO:0045839)	6
GO_Biological_Process_2018	DNA recombination (GO:0006310)	6
GO_Biological_Process_2018	negative regulation of interleukin-12 production (GO:0032695)	6
GO_Biological_Process_2018	positive regulation of macromolecule biosynthetic process (GO:0010557)	6
GO_Biological_Process_2018	positive regulation of cellular catabolic process (GO:0031331)	6
GO_Biological_Process_2018	microtubule polymerization (GO:0046785)	6
GO_Biological_Process_2018	protein localization to nucleus (GO:0034504)	6
GO_Biological_Process_2018	respiratory chain complex IV assembly (GO:0008535)	6
GO_Biological_Process_2018	cellular response to nitrogen starvation (GO:0006995)	6
GO_Biological_Process_2018	cellular response to nitrogen levels (GO:0043562)	6
GO_Biological_Process_2018	negative regulation of cell division (GO:0051782)	6
GO_Biological_Process_2018	negative regulation of transmembrane receptor protein serine/threonine kinase signaling pathway (GO:0090101)	6
GO_Biological_Process_2018	secondary alcohol metabolic process (GO:1902652)	6
GO_Biological_Process_2018	fructose 1,6-bisphosphate metabolic process (GO:0030388)	6
GO_Biological_Process_2018	negative regulation of vasculature development (GO:1901343)	6
GO_Biological_Process_2018	phosphatidylglycerol acyl-chain remodeling (GO:0036148)	6
GO_Biological_Process_2018	positive regulation of catabolic process (GO:0009896)	6
GO_Biological_Process_2018	methylation-dependent chromatin silencing (GO:0006346)	6
GO_Biological_Process_2018	cAMP-mediated signaling (GO:0019933)	6
GO_Biological_Process_2018	intracellular estrogen receptor signaling pathway (GO:0030520)	6
GO_Biological_Process_2018	high-density lipoprotein particle assembly (GO:0034380)	6
GO_Biological_Process_2018	detection of chemical stimulus involved in sensory perception of smell (GO:0050911)	6
GO_Biological_Process_2018	peptidyl-serine phosphorylation (GO:0018105)	6
GO_Biological_Process_2018	chaperone-mediated protein transport (GO:0072321)	6
GO_Biological_Process_2018	cell morphogenesis involved in differentiation (GO:0000904)	6
GO_Biological_Process_2018	neurotransmitter transport (GO:0006836)	6
GO_Biological_Process_2018	termination of RNA polymerase II transcription (GO:0006369)	6
GO_Biological_Process_2018	negative regulation of GTPase activity (GO:0034260)	6
GO_Biological_Process_2018	positive regulation of intracellular transport (GO:0032388)	6
GO_Biological_Process_2018	regulation of stem cell proliferation (GO:0072091)	6
GO_Biological_Process_2018	negative regulation of interleukin-17 production (GO:0032700)	6
GO_Biological_Process_2018	regulation of mitotic metaphase/anaphase transition (GO:0030071)	6
GO_Biological_Process_2018	regulation of cytoplasmic transport (GO:1903649)	6
GO_Biological_Process_2018	DNA replication checkpoint (GO:0000076)	6
GO_Biological_Process_2018	protein methylation (GO:0006479)	6
GO_Biological_Process_2018	regulation of protein catabolic process (GO:0042176)	6
GO_Biological_Process_2018	positive regulation of dephosphorylation (GO:0035306)	6
GO_Biological_Process_2018	ionotropic glutamate receptor signaling pathway (GO:0035235)	6
GO_Biological_Process_2018	positive regulation of cysteine-type endopeptidase activity (GO:2001056)	6
GO_Biological_Process_2018	positive regulation of lymphocyte differentiation (GO:0045621)	6
GO_Biological_Process_2018	Notch signaling pathway (GO:0007219)	6
GO_Biological_Process_2018	mRNA 3'-splice site recognition (GO:0000389)	6
GO_Biological_Process_2018	regulation of programmed cell death (GO:0043067)	6
GO_Biological_Process_2018	cellular response to glucocorticoid stimulus (GO:0071385)	6
GO_Biological_Process_2018	positive regulation of cell cycle G1/S phase transition (GO:1902808)	6
GO_Biological_Process_2018	regulation of cell aging (GO:0090342)	6
GO_Biological_Process_2018	atrial septum development (GO:0003283)	6
GO_Biological_Process_2018	positive regulation by host of viral process (GO:0044794)	6
GO_Biological_Process_2018	nucleotide-excision repair, DNA incision (GO:0033683)	6
GO_Biological_Process_2018	positive regulation of lipid storage (GO:0010884)	6
GO_Biological_Process_2018	apoptotic process (GO:0006915)	6
GO_Biological_Process_2018	regulation of delayed rectifier potassium channel activity (GO:1902259)	6
GO_Biological_Process_2018	regulation of macrophage activation (GO:0043030)	6
GO_Biological_Process_2018	positive regulation of transcription of Notch receptor target (GO:0007221)	6
GO_Biological_Process_2018	establishment of protein localization to organelle (GO:0072594)	6
GO_Biological_Process_2018	autophagosome maturation (GO:0097352)	6
GO_Biological_Process_2018	regulation of platelet-derived growth factor receptor-beta signaling pathway (GO:2000586)	6
GO_Biological_Process_2018	RNA metabolic process (GO:0016070)	6
GO_Biological_Process_2018	positive regulation of calcium ion transmembrane transport (GO:1904427)	6
GO_Biological_Process_2018	growth hormone receptor signaling pathway (GO:0060396)	6
GO_Biological_Process_2018	regulation of Wnt signaling pathway (GO:0030111)	6
GO_Biological_Process_2018	positive regulation of epidermal cell differentiation (GO:0045606)	5
GO_Biological_Process_2018	positive regulation of regulatory T cell differentiation (GO:0045591)	5
GO_Biological_Process_2018	response to metal ion (GO:0010038)	5
GO_Biological_Process_2018	regulation of heart contraction (GO:0008016)	5
GO_Biological_Process_2018	regulation of G-protein coupled receptor protein signaling pathway (GO:0008277)	5
GO_Biological_Process_2018	mRNA transcription (GO:0009299)	5
GO_Biological_Process_2018	positive regulation of protein binding (GO:0032092)	5
GO_Biological_Process_2018	peptidyl-proline hydroxylation (GO:0019511)	5
GO_Biological_Process_2018	transforming growth factor beta receptor signaling pathway (GO:0007179)	5
GO_Biological_Process_2018	positive regulation of fatty acid biosynthetic process (GO:0045723)	5
GO_Biological_Process_2018	negative regulation of T cell mediated immunity (GO:0002710)	5
GO_Biological_Process_2018	positive regulation of isomerase activity (GO:0010912)	5
GO_Biological_Process_2018	activation of cysteine-type endopeptidase activity involved in apoptotic process (GO:0006919)	5
GO_Biological_Process_2018	release of sequestered calcium ion into cytosol (GO:0051209)	5
GO_Biological_Process_2018	nicotinamide nucleotide metabolic process (GO:0046496)	5
GO_Biological_Process_2018	positive regulation of chromatin silencing (GO:0031937)	5
GO_Biological_Process_2018	regulation of cytokinesis (GO:0032465)	5
GO_Biological_Process_2018	peptidyl-lysine dimethylation (GO:0018027)	5
GO_Biological_Process_2018	creatine metabolic process (GO:0006600)	5
GO_Biological_Process_2018	gland morphogenesis (GO:0022612)	5
GO_Biological_Process_2018	anterograde trans-synaptic signaling (GO:0098916)	5
GO_Biological_Process_2018	snRNA processing (GO:0016180)	5
GO_Biological_Process_2018	carnitine transport (GO:0015879)	5
GO_Biological_Process_2018	amino-acid betaine transport (GO:0015838)	5
GO_Biological_Process_2018	regulation of ventricular cardiac muscle cell action potential (GO:0098911)	5
GO_Biological_Process_2018	coenzyme metabolic process (GO:0006732)	5
GO_Biological_Process_2018	transepithelial transport (GO:0070633)	5
GO_Biological_Process_2018	regulation of protein exit from endoplasmic reticulum (GO:0070861)	5
GO_Biological_Process_2018	regulated exocytosis (GO:0045055)	5
GO_Biological_Process_2018	positive regulation of cellular protein metabolic process (GO:0032270)	5
GO_Biological_Process_2018	negative regulation of catalytic activity (GO:0043086)	5
GO_Biological_Process_2018	regulation of G1/S transition of mitotic cell cycle (GO:2000045)	5
GO_Biological_Process_2018	positive regulation of ER-associated ubiquitin-dependent protein catabolic process (GO:1903071)	5
GO_Biological_Process_2018	renal system development (GO:0072001)	5
GO_Biological_Process_2018	aldehyde biosynthetic process (GO:0046184)	5
GO_Biological_Process_2018	regulation of T-helper 2 cell cytokine production (GO:2000551)	5
GO_Biological_Process_2018	positive regulation of interleukin-4 production (GO:0032753)	5
GO_Biological_Process_2018	glycosaminoglycan catabolic process (GO:0006027)	5
GO_Biological_Process_2018	regulation of chromosome segregation (GO:0051983)	5
GO_Biological_Process_2018	negative regulation of axonogenesis (GO:0050771)	5
GO_Biological_Process_2018	negative regulation of biomineral tissue development (GO:0070168)	5
GO_Biological_Process_2018	ribosomal small subunit assembly (GO:0000028)	5
GO_Biological_Process_2018	positive regulation of calcium ion-dependent exocytosis (GO:0045956)	5
GO_Biological_Process_2018	response to reactive oxygen species (GO:0000302)	5
GO_Biological_Process_2018	nucleus localization (GO:0051647)	5
GO_Biological_Process_2018	nucleotide-excision repair (GO:0006289)	5
GO_Biological_Process_2018	oxygen transport (GO:0015671)	5
GO_Biological_Process_2018	phosphatidylinositol-mediated signaling (GO:0048015)	5
GO_Biological_Process_2018	positive regulation of cell motility (GO:2000147)	5
GO_Biological_Process_2018	negative regulation of ATPase activity (GO:0032780)	5
GO_Biological_Process_2018	lymphocyte activation involved in immune response (GO:0002285)	5
GO_Biological_Process_2018	regulation of peptidyl-serine phosphorylation of STAT protein (GO:0033139)	5
GO_Biological_Process_2018	positive regulation of peptidyl-serine phosphorylation of STAT protein (GO:0033141)	5
GO_Biological_Process_2018	response to dsRNA (GO:0043331)	5
GO_Biological_Process_2018	T cell activation involved in immune response (GO:0002286)	5
GO_Biological_Process_2018	natural killer cell activation involved in immune response (GO:0002323)	5
GO_Biological_Process_2018	B cell proliferation (GO:0042100)	5
GO_Biological_Process_2018	lymphocyte proliferation (GO:0046651)	5
GO_Biological_Process_2018	response to exogenous dsRNA (GO:0043330)	5
GO_Biological_Process_2018	B cell activation (GO:0042113)	5
GO_Biological_Process_2018	regulation of bone resorption (GO:0045124)	5
GO_Biological_Process_2018	cellular response to growth hormone stimulus (GO:0071378)	5
GO_Biological_Process_2018	cellular response to ATP (GO:0071318)	5
GO_Biological_Process_2018	regulation of type I interferon-mediated signaling pathway (GO:0060338)	5
GO_Biological_Process_2018	ornithine transport (GO:0015822)	5
GO_Biological_Process_2018	positive regulation of interleukin-5 production (GO:0032754)	5
GO_Biological_Process_2018	natural killer cell activation (GO:0030101)	5
GO_Biological_Process_2018	mRNA transport (GO:0051028)	5
GO_Biological_Process_2018	regulation of cytokine secretion involved in immune response (GO:0002739)	5
GO_Biological_Process_2018	regulation of glycolytic process (GO:0006110)	5
GO_Biological_Process_2018	regulation of nucleocytoplasmic transport (GO:0046822)	5
GO_Biological_Process_2018	histone-serine phosphorylation (GO:0035404)	5
GO_Biological_Process_2018	mitochondrial respiratory chain complex IV assembly (GO:0033617)	5
GO_Biological_Process_2018	negative regulation of striated muscle tissue development (GO:0045843)	5
GO_Biological_Process_2018	negative regulation of nervous system development (GO:0051961)	5
GO_Biological_Process_2018	regulation of mitotic spindle assembly (GO:1901673)	5
GO_Biological_Process_2018	glucocorticoid biosynthetic process (GO:0006704)	5
GO_Biological_Process_2018	positive regulation of mRNA 3'-end processing (GO:0031442)	5
GO_Biological_Process_2018	embryonic camera-type eye development (GO:0031076)	5
GO_Biological_Process_2018	regulation of ion transmembrane transport (GO:0034765)	5
GO_Biological_Process_2018	regulation of actin cytoskeleton reorganization (GO:2000249)	5
GO_Biological_Process_2018	negative regulation of protein serine/threonine kinase activity (GO:0071901)	5
GO_Biological_Process_2018	plasma membrane organization (GO:0007009)	5
GO_Biological_Process_2018	negative regulation of canonical Wnt signaling pathway (GO:0090090)	5
GO_Biological_Process_2018	regulation of telomerase activity (GO:0051972)	5
GO_Biological_Process_2018	positive regulation of telomerase activity (GO:0051973)	5
GO_Biological_Process_2018	peptidyl-threonine modification (GO:0018210)	5
GO_Biological_Process_2018	ephrin receptor signaling pathway (GO:0048013)	5
GO_Biological_Process_2018	regulation of keratinocyte differentiation (GO:0045616)	5
GO_Biological_Process_2018	chylomicron assembly (GO:0034378)	5
GO_Biological_Process_2018	regulation of mRNA stability (GO:0043488)	5
GO_Biological_Process_2018	glycosaminoglycan biosynthetic process (GO:0006024)	5
GO_Biological_Process_2018	phosphatidylcholine metabolic process (GO:0046470)	5
GO_Biological_Process_2018	phosphatidylglycerol metabolic process (GO:0046471)	5
GO_Biological_Process_2018	organonitrogen compound biosynthetic process (GO:1901566)	5
GO_Biological_Process_2018	phosphatidylinositol acyl-chain remodeling (GO:0036149)	5
GO_Biological_Process_2018	positive regulation of extrinsic apoptotic signaling pathway (GO:2001238)	5
GO_Biological_Process_2018	chylomicron remodeling (GO:0034371)	5
GO_Biological_Process_2018	regulation of protein depolymerization (GO:1901879)	5
GO_Biological_Process_2018	negative regulation of cell-substrate adhesion (GO:0010812)	5
GO_Biological_Process_2018	female gamete generation (GO:0007292)	5
GO_Biological_Process_2018	regulation of fatty acid biosynthetic process (GO:0042304)	5
GO_Biological_Process_2018	regulation of metaphase/anaphase transition of cell cycle (GO:1902099)	5
GO_Biological_Process_2018	tRNA metabolic process (GO:0006399)	5
GO_Biological_Process_2018	cAMP biosynthetic process (GO:0006171)	5
GO_Biological_Process_2018	positive regulation of interleukin-6 production (GO:0032755)	5
GO_Biological_Process_2018	negative regulation of protein kinase activity by regulation of protein phosphorylation (GO:0044387)	5
GO_Biological_Process_2018	regulation of protein homooligomerization (GO:0032462)	5
GO_Biological_Process_2018	cellular response to molecule of bacterial origin (GO:0071219)	5
GO_Biological_Process_2018	nucleic acid phosphodiester bond hydrolysis (GO:0090305)	5
GO_Biological_Process_2018	tRNA aminoacylation (GO:0043039)	5
GO_Biological_Process_2018	phosphatidylethanolamine acyl-chain remodeling (GO:0036152)	5
GO_Biological_Process_2018	epithelial cell development (GO:0002064)	5
GO_Biological_Process_2018	purine ribonucleotide metabolic process (GO:0009150)	5
GO_Biological_Process_2018	unsaturated fatty acid metabolic process (GO:0033559)	5
GO_Biological_Process_2018	antibacterial humoral response (GO:0019731)	5
GO_Biological_Process_2018	response to lipopolysaccharide (GO:0032496)	5
GO_Biological_Process_2018	positive regulation of supramolecular fiber organization (GO:1902905)	5
GO_Biological_Process_2018	cellular response to interleukin-12 (GO:0071349)	5
GO_Biological_Process_2018	interleukin-12-mediated signaling pathway (GO:0035722)	5
GO_Biological_Process_2018	positive regulation of telomere maintenance via telomerase (GO:0032212)	5
GO_Biological_Process_2018	regulation of intracellular transport (GO:0032386)	5
GO_Biological_Process_2018	activation of protein kinase B activity (GO:0032148)	5
GO_Biological_Process_2018	double-strand break repair via homologous recombination (GO:0000724)	5
GO_Biological_Process_2018	glutamate receptor signaling pathway (GO:0007215)	5
GO_Biological_Process_2018	regulation of innate immune response (GO:0045088)	5
GO_Biological_Process_2018	negative regulation of stress-activated MAPK cascade (GO:0032873)	5
GO_Biological_Process_2018	septin ring assembly (GO:0000921)	5
GO_Biological_Process_2018	negative regulation of bone resorption (GO:0045779)	5
GO_Biological_Process_2018	cyclic nucleotide metabolic process (GO:0009187)	5
GO_Biological_Process_2018	ERBB2 signaling pathway (GO:0038128)	5
GO_Biological_Process_2018	response to ethanol (GO:0045471)	5
GO_Biological_Process_2018	sulfate transport (GO:0008272)	5
GO_Biological_Process_2018	negative regulation of epidermal cell differentiation (GO:0045605)	5
GO_Biological_Process_2018	folic acid transport (GO:0015884)	4
GO_Biological_Process_2018	positive regulation of protein dephosphorylation (GO:0035307)	4
GO_Biological_Process_2018	immune response-inhibiting cell surface receptor signaling pathway (GO:0002767)	4
GO_Biological_Process_2018	regulation of endothelial cell migration (GO:0010594)	4
GO_Biological_Process_2018	regulation of vasoconstriction (GO:0019229)	4
GO_Biological_Process_2018	negative regulation of nitric oxide metabolic process (GO:1904406)	4
GO_Biological_Process_2018	negative regulation of nitric oxide biosynthetic process (GO:0045019)	4
GO_Biological_Process_2018	myelination in peripheral nervous system (GO:0022011)	4
GO_Biological_Process_2018	negative regulation of reactive oxygen species biosynthetic process (GO:1903427)	4
GO_Biological_Process_2018	positive regulation of catenin import into nucleus (GO:0035413)	4
GO_Biological_Process_2018	peptidyl-lysine monomethylation (GO:0018026)	4
GO_Biological_Process_2018	4-hydroxyproline metabolic process (GO:0019471)	4
GO_Biological_Process_2018	regulation of epidermal cell differentiation (GO:0045604)	4
GO_Biological_Process_2018	pyroptosis (GO:0070269)	4
GO_Biological_Process_2018	positive regulation of mitochondrial membrane potential (GO:0010918)	4
GO_Biological_Process_2018	negative regulation of secretion by cell (GO:1903531)	4
GO_Biological_Process_2018	positive regulation of G2/M transition of mitotic cell cycle (GO:0010971)	4
GO_Biological_Process_2018	regulation of sequestering of zinc ion (GO:0061088)	4
GO_Biological_Process_2018	protein prenylation (GO:0018342)	4
GO_Biological_Process_2018	embryonic skeletal joint development (GO:0072498)	4
GO_Biological_Process_2018	carbohydrate transport (GO:0008643)	4
GO_Biological_Process_2018	positive regulation of antigen processing and presentation (GO:0002579)	4
GO_Biological_Process_2018	positive regulation of dendritic cell antigen processing and presentation (GO:0002606)	4
GO_Biological_Process_2018	positive regulation of T-helper cell differentiation (GO:0045624)	4
GO_Biological_Process_2018	regulation of steroid metabolic process (GO:0019218)	4
GO_Biological_Process_2018	positive regulation of production of molecular mediator of immune response (GO:0002702)	4
GO_Biological_Process_2018	canonical Wnt signaling pathway (GO:0060070)	4
GO_Biological_Process_2018	leukocyte aggregation (GO:0070486)	4
GO_Biological_Process_2018	modulation by host of viral process (GO:0044788)	4
GO_Biological_Process_2018	brain development (GO:0007420)	4
GO_Biological_Process_2018	negative regulation of nucleic acid-templated transcription (GO:1903507)	4
GO_Biological_Process_2018	receptor clustering (GO:0043113)	4
GO_Biological_Process_2018	semaphorin-plexin signaling pathway involved in neuron projection guidance (GO:1902285)	4
GO_Biological_Process_2018	negative regulation of transcription elongation from RNA polymerase II promoter (GO:0034244)	4
GO_Biological_Process_2018	regulation of lymphocyte migration (GO:2000401)	4
GO_Biological_Process_2018	membrane protein ectodomain proteolysis (GO:0006509)	4
GO_Biological_Process_2018	negative regulation of cell cycle G1/S phase transition (GO:1902807)	4
GO_Biological_Process_2018	negative regulation of viral entry into host cell (GO:0046597)	4
GO_Biological_Process_2018	regulation of protein import into nucleus (GO:0042306)	4
GO_Biological_Process_2018	positive regulation of cell migration involved in sprouting angiogenesis (GO:0090050)	4
GO_Biological_Process_2018	Rho protein signal transduction (GO:0007266)	4
GO_Biological_Process_2018	establishment of epithelial cell polarity (GO:0090162)	4
GO_Biological_Process_2018	positive regulation of peptidyl-serine phosphorylation (GO:0033138)	4
GO_Biological_Process_2018	nucleotide-excision repair, DNA duplex unwinding (GO:0000717)	4
GO_Biological_Process_2018	poly(A)+ mRNA export from nucleus (GO:0016973)	4
GO_Biological_Process_2018	regulation of transcription from RNA polymerase I promoter (GO:0006356)	4
GO_Biological_Process_2018	negative regulation of JNK cascade (GO:0046329)	4
GO_Biological_Process_2018	positive regulation of actin filament polymerization (GO:0030838)	4
GO_Biological_Process_2018	central nervous system neuron differentiation (GO:0021953)	4
GO_Biological_Process_2018	copper ion import (GO:0015677)	4
GO_Biological_Process_2018	regulation of activation of Janus kinase activity (GO:0010533)	4
GO_Biological_Process_2018	response to ATP (GO:0033198)	4
GO_Biological_Process_2018	neurogenesis (GO:0022008)	4
GO_Biological_Process_2018	lipoprotein biosynthetic process (GO:0042158)	4
GO_Biological_Process_2018	positive regulation of monocyte chemotaxis (GO:0090026)	4
GO_Biological_Process_2018	tRNA transport (GO:0051031)	4
GO_Biological_Process_2018	regulation of intracellular protein transport (GO:0033157)	4
GO_Biological_Process_2018	regulation of monooxygenase activity (GO:0032768)	4
GO_Biological_Process_2018	succinyl-CoA metabolic process (GO:0006104)	4
GO_Biological_Process_2018	pyrimidine-containing compound metabolic process (GO:0072527)	4
GO_Biological_Process_2018	positive regulation of immunoglobulin mediated immune response (GO:0002891)	4
GO_Biological_Process_2018	regulation of protein localization (GO:0032880)	4
GO_Biological_Process_2018	response to UV (GO:0009411)	4
GO_Biological_Process_2018	neuronal ion channel clustering (GO:0045161)	4
GO_Biological_Process_2018	myotube differentiation (GO:0014902)	4
GO_Biological_Process_2018	negative regulation of intracellular signal transduction (GO:1902532)	4
GO_Biological_Process_2018	phosphatidylinositol metabolic process (GO:0046488)	4
GO_Biological_Process_2018	histone H2A monoubiquitination (GO:0035518)	4
GO_Biological_Process_2018	circulatory system development (GO:0072359)	4
GO_Biological_Process_2018	regulation of epithelial cell proliferation (GO:0050678)	4
GO_Biological_Process_2018	pyrimidine deoxyribonucleotide catabolic process (GO:0009223)	4
GO_Biological_Process_2018	regulation of transforming growth factor beta receptor signaling pathway (GO:0017015)	4
GO_Biological_Process_2018	cellular response to insulin stimulus (GO:0032869)	4
GO_Biological_Process_2018	monocarboxylic acid metabolic process (GO:0032787)	4
GO_Biological_Process_2018	regulation of stress fiber assembly (GO:0051492)	4
GO_Biological_Process_2018	negative regulation of protein complex assembly (GO:0031333)	4
GO_Biological_Process_2018	dicarboxylic acid metabolic process (GO:0043648)	4
GO_Biological_Process_2018	positive regulation of endothelial cell migration (GO:0010595)	4
GO_Biological_Process_2018	sterol transport (GO:0015918)	4
GO_Biological_Process_2018	negative regulation of cellular process (GO:0048523)	4
GO_Biological_Process_2018	interleukin-17-mediated signaling pathway (GO:0097400)	4
GO_Biological_Process_2018	depyrimidination (GO:0045008)	4
GO_Biological_Process_2018	cellular response to interleukin-17 (GO:0097398)	4
GO_Biological_Process_2018	regulation of transmembrane receptor protein serine/threonine kinase signaling pathway (GO:0090092)	4
GO_Biological_Process_2018	positive regulation of telomere capping (GO:1904355)	4
GO_Biological_Process_2018	antigen processing and presentation of exogenous peptide antigen (GO:0002478)	4
GO_Biological_Process_2018	antigen processing and presentation of exogenous peptide antigen via MHC class II (GO:0019886)	4
GO_Biological_Process_2018	antigen processing and presentation of peptide antigen via MHC class II (GO:0002495)	4
GO_Biological_Process_2018	positive regulation of neural precursor cell proliferation (GO:2000179)	4
GO_Biological_Process_2018	osteoclast differentiation (GO:0030316)	4
GO_Biological_Process_2018	Notch receptor processing (GO:0007220)	4
GO_Biological_Process_2018	Golgi ribbon formation (GO:0090161)	4
GO_Biological_Process_2018	T cell activation (GO:0042110)	4
GO_Biological_Process_2018	DNA-templated transcription, termination (GO:0006353)	4
GO_Biological_Process_2018	protein localization to endosome (GO:0036010)	4
GO_Biological_Process_2018	serine family amino acid catabolic process (GO:0009071)	4
GO_Biological_Process_2018	regulation of apoptotic signaling pathway (GO:2001233)	4
GO_Biological_Process_2018	negative regulation of viral life cycle (GO:1903901)	4
GO_Biological_Process_2018	chordate embryonic development (GO:0043009)	4
GO_Biological_Process_2018	negative regulation of response to cytokine stimulus (GO:0060761)	4
GO_Biological_Process_2018	positive regulation of glycolytic process (GO:0045821)	4
GO_Biological_Process_2018	positive regulation of coenzyme metabolic process (GO:0051197)	4
GO_Biological_Process_2018	attachment of mitotic spindle microtubules to kinetochore (GO:0051315)	4
GO_Biological_Process_2018	hexose biosynthetic process (GO:0019319)	4
GO_Biological_Process_2018	regulation of Ras protein signal transduction (GO:0046578)	4
GO_Biological_Process_2018	icosanoid biosynthetic process (GO:0046456)	4
GO_Biological_Process_2018	macroautophagy (GO:0016236)	4
GO_Biological_Process_2018	monocarboxylic acid biosynthetic process (GO:0072330)	4
GO_Biological_Process_2018	peptidyl-tyrosine dephosphorylation (GO:0035335)	4
GO_Biological_Process_2018	carbohydrate homeostasis (GO:0033500)	4
GO_Biological_Process_2018	phosphatidylcholine acyl-chain remodeling (GO:0036151)	4
GO_Biological_Process_2018	regulation of signal transduction (GO:0009966)	4
GO_Biological_Process_2018	positive regulation of calcium ion import (GO:0090280)	4
GO_Biological_Process_2018	substrate adhesion-dependent cell spreading (GO:0034446)	4
GO_Biological_Process_2018	organic hydroxy compound catabolic process (GO:1901616)	4
GO_Biological_Process_2018	pericardium development (GO:0060039)	4
GO_Biological_Process_2018	cellular response to ammonium ion (GO:0071242)	4
GO_Biological_Process_2018	regulation of RNA metabolic process (GO:0051252)	4
GO_Biological_Process_2018	regulation of integrin activation (GO:0033623)	4
GO_Biological_Process_2018	positive regulation of protein polymerization (GO:0032273)	4
GO_Biological_Process_2018	regulation of lymphocyte proliferation (GO:0050670)	4
GO_Biological_Process_2018	response to X-ray (GO:0010165)	4
GO_Biological_Process_2018	regulation of store-operated calcium entry (GO:2001256)	4
GO_Biological_Process_2018	regulation of dopamine metabolic process (GO:0042053)	4
GO_Biological_Process_2018	cellular monovalent inorganic anion homeostasis (GO:0030320)	4
GO_Biological_Process_2018	programmed necrotic cell death (GO:0097300)	4
GO_Biological_Process_2018	positive regulation of lipid localization (GO:1905954)	4
GO_Biological_Process_2018	positive regulation of mitotic nuclear division (GO:0045840)	4
GO_Biological_Process_2018	mucosal immune response (GO:0002385)	4
GO_Biological_Process_2018	glycolytic process (GO:0006096)	4
GO_Biological_Process_2018	endoderm development (GO:0007492)	4
GO_Biological_Process_2018	ATP generation from ADP (GO:0006757)	4
GO_Biological_Process_2018	production of siRNA involved in RNA interference (GO:0030422)	4
GO_Biological_Process_2018	cellular response to starvation (GO:0009267)	4
GO_Biological_Process_2018	positive regulation of type I interferon production (GO:0032481)	4
GO_Biological_Process_2018	triglyceride catabolic process (GO:0019433)	4
GO_Biological_Process_2018	acylglycerol catabolic process (GO:0046464)	4
GO_Biological_Process_2018	protein autophosphorylation (GO:0046777)	4
GO_Biological_Process_2018	cellular response to gamma radiation (GO:0071480)	4
GO_Biological_Process_2018	ERBB signaling pathway (GO:0038127)	4
GO_Biological_Process_2018	regulation of smooth muscle contraction (GO:0006940)	4
GO_Biological_Process_2018	regulation of chemokine secretion (GO:0090196)	4
GO_Biological_Process_2018	cellular response to ionizing radiation (GO:0071479)	4
GO_Biological_Process_2018	positive regulation of cellular biosynthetic process (GO:0031328)	4
GO_Biological_Process_2018	posttranscriptional regulation of gene expression (GO:0010608)	4
GO_Biological_Process_2018	regulation of megakaryocyte differentiation (GO:0045652)	4
GO_Biological_Process_2018	ribosomal large subunit biogenesis (GO:0042273)	4
GO_Biological_Process_2018	regulation of autophagy of mitochondrion (GO:1903146)	4
GO_Biological_Process_2018	regulation of cellular biosynthetic process (GO:0031326)	4
GO_Biological_Process_2018	intraciliary transport involved in cilium assembly (GO:0035735)	4
GO_Biological_Process_2018	positive regulation of epithelial cell apoptotic process (GO:1904037)	4
GO_Biological_Process_2018	regulation of saliva secretion (GO:0046877)	4
GO_Biological_Process_2018	T cell homeostasis (GO:0043029)	4
GO_Biological_Process_2018	cellular biogenic amine catabolic process (GO:0042402)	4
GO_Biological_Process_2018	cGMP metabolic process (GO:0046068)	4
GO_Biological_Process_2018	phosphatidylethanolamine metabolic process (GO:0046337)	4
GO_Biological_Process_2018	regulation of secretion by cell (GO:1903530)	4
GO_Biological_Process_2018	negative regulation of B cell activation (GO:0050869)	4
GO_Biological_Process_2018	regulation of cellular metabolic process (GO:0031323)	4
GO_Biological_Process_2018	positive regulation of intracellular signal transduction (GO:1902533)	4
GO_Biological_Process_2018	receptor recycling (GO:0001881)	4
GO_Biological_Process_2018	positive regulation of ERBB signaling pathway (GO:1901186)	4
GO_Biological_Process_2018	interleukin-27-mediated signaling pathway (GO:0070106)	4
GO_Biological_Process_2018	recombinational repair (GO:0000725)	4
GO_Biological_Process_2018	isoprenoid metabolic process (GO:0006720)	4
GO_Biological_Process_2018	mRNA export from nucleus (GO:0006406)	4
GO_Biological_Process_2018	regulation of peptidyl-tyrosine phosphorylation (GO:0050730)	4
GO_Biological_Process_2018	negative regulation of cell cycle G2/M phase transition (GO:1902750)	4
GO_Biological_Process_2018	formation of translation preinitiation complex (GO:0001731)	4
GO_Biological_Process_2018	positive regulation of histone H4 acetylation (GO:0090240)	4
GO_Biological_Process_2018	regulation of dendrite development (GO:0050773)	4
GO_Biological_Process_2018	regulation of interferon-gamma production (GO:0032649)	4
GO_Biological_Process_2018	negative regulation of endocytosis (GO:0045806)	3
GO_Biological_Process_2018	cofactor transport (GO:0051181)	3
GO_Biological_Process_2018	positive regulation of heart contraction (GO:0045823)	3
GO_Biological_Process_2018	skeletal muscle tissue development (GO:0007519)	3
GO_Biological_Process_2018	regulation of macrophage derived foam cell differentiation (GO:0010743)	3
GO_Biological_Process_2018	positive regulation of calcium ion transmembrane transporter activity (GO:1901021)	3
GO_Biological_Process_2018	positive regulation of blood circulation (GO:1903524)	3
GO_Biological_Process_2018	lymphatic endothelial cell differentiation (GO:0060836)	3
GO_Biological_Process_2018	regulation of immune response (GO:0050776)	3
GO_Biological_Process_2018	regulation of cell cycle process (GO:0010564)	3
GO_Biological_Process_2018	protein localization to endoplasmic reticulum (GO:0070972)	3
GO_Biological_Process_2018	peripheral nervous system axon ensheathment (GO:0032292)	3
GO_Biological_Process_2018	negative regulation of leukocyte mediated cytotoxicity (GO:0001911)	3
GO_Biological_Process_2018	Schwann cell development (GO:0014044)	3
GO_Biological_Process_2018	transcription initiation from RNA polymerase II promoter (GO:0006367)	3
GO_Biological_Process_2018	regulation of interleukin-8 production (GO:0032677)	3
GO_Biological_Process_2018	flavonoid glucuronidation (GO:0052696)	3
GO_Biological_Process_2018	positive regulation of membrane potential (GO:0045838)	3
GO_Biological_Process_2018	negative regulation of sequestering of calcium ion (GO:0051283)	3
GO_Biological_Process_2018	leptin-mediated signaling pathway (GO:0033210)	3
GO_Biological_Process_2018	zinc II ion transport (GO:0006829)	3
GO_Biological_Process_2018	visual perception (GO:0007601)	3
GO_Biological_Process_2018	intermediate filament organization (GO:0045109)	3
GO_Biological_Process_2018	carbohydrate catabolic process (GO:0016052)	3
GO_Biological_Process_2018	endosome to lysosome transport via multivesicular body sorting pathway (GO:0032510)	3
GO_Biological_Process_2018	protein depolymerization (GO:0051261)	3
GO_Biological_Process_2018	negative regulation of innate immune response (GO:0045824)	3
GO_Biological_Process_2018	neuromuscular junction development (GO:0007528)	3
GO_Biological_Process_2018	negative regulation of gene expression (GO:0010629)	3
GO_Biological_Process_2018	GPI anchor biosynthetic process (GO:0006506)	3
GO_Biological_Process_2018	negative regulation of necrotic cell death (GO:0060547)	3
GO_Biological_Process_2018	carboxylic acid transport (GO:0046942)	3
GO_Biological_Process_2018	positive regulation of DNA damage response, signal transduction by p53 class mediator (GO:0043517)	3
GO_Biological_Process_2018	positive regulation of viral process (GO:0048524)	3
GO_Biological_Process_2018	sphingoid biosynthetic process (GO:0046520)	3
GO_Biological_Process_2018	small RNA loading onto RISC (GO:0070922)	3
GO_Biological_Process_2018	DNA double-strand break processing (GO:0000729)	3
GO_Biological_Process_2018	protein targeting to mitochondrion (GO:0006626)	3
GO_Biological_Process_2018	positive regulation of ion transmembrane transporter activity (GO:0032414)	3
GO_Biological_Process_2018	positive regulation of membrane depolarization (GO:1904181)	3
GO_Biological_Process_2018	regulation of hormone biosynthetic process (GO:0046885)	3
GO_Biological_Process_2018	regulation of interleukin-2 production (GO:0032663)	3
GO_Biological_Process_2018	bicarbonate transport (GO:0015701)	3
GO_Biological_Process_2018	dicarboxylic acid transport (GO:0006835)	3
GO_Biological_Process_2018	positive regulation of organelle organization (GO:0010638)	3
GO_Biological_Process_2018	regulation of epithelial to mesenchymal transition (GO:0010717)	3
GO_Biological_Process_2018	diol biosynthetic process (GO:0034312)	3
GO_Biological_Process_2018	sphingosine biosynthetic process (GO:0046512)	3
GO_Biological_Process_2018	positive regulation of protein modification by small protein conjugation or removal (GO:1903322)	3
GO_Biological_Process_2018	cellular response to light stimulus (GO:0071482)	3
GO_Biological_Process_2018	erythrocyte development (GO:0048821)	3
GO_Biological_Process_2018	DNA catabolic process (GO:0006308)	3
GO_Biological_Process_2018	semaphorin-plexin signaling pathway involved in axon guidance (GO:1902287)	3
GO_Biological_Process_2018	negative regulation of NF-kappaB import into nucleus (GO:0042347)	3
GO_Biological_Process_2018	nucleoside salvage (GO:0043174)	3
GO_Biological_Process_2018	snRNA 3'-end processing (GO:0034472)	3
GO_Biological_Process_2018	positive regulation of TORC1 signaling (GO:1904263)	3
GO_Biological_Process_2018	regulation of ER-associated ubiquitin-dependent protein catabolic process (GO:1903069)	3
GO_Biological_Process_2018	neuron apoptotic process (GO:0051402)	3
GO_Biological_Process_2018	regulation of fatty acid oxidation (GO:0046320)	3
GO_Biological_Process_2018	plasma membrane bounded cell projection organization (GO:0120036)	3
GO_Biological_Process_2018	cellular response to UV (GO:0034644)	3
GO_Biological_Process_2018	endosome to lysosome transport (GO:0008333)	3
GO_Biological_Process_2018	neuron development (GO:0048666)	3
GO_Biological_Process_2018	Ras protein signal transduction (GO:0007265)	3
GO_Biological_Process_2018	superoxide anion generation (GO:0042554)	3
GO_Biological_Process_2018	B cell differentiation (GO:0030183)	3
GO_Biological_Process_2018	embryonic cranial skeleton morphogenesis (GO:0048701)	3
GO_Biological_Process_2018	quaternary ammonium group transport (GO:0015697)	3
GO_Biological_Process_2018	axonogenesis (GO:0007409)	3
GO_Biological_Process_2018	regulation of protein transport (GO:0051223)	3
GO_Biological_Process_2018	UV protection (GO:0009650)	3
GO_Biological_Process_2018	positive regulation of T cell cytokine production (GO:0002726)	3
GO_Biological_Process_2018	transcription-dependent tethering of RNA polymerase II gene DNA at nuclear periphery (GO:0000972)	3
GO_Biological_Process_2018	nucleic acid transport (GO:0050657)	3
GO_Biological_Process_2018	negative regulation of cAMP biosynthetic process (GO:0030818)	3
GO_Biological_Process_2018	cellular response to interleukin-6 (GO:0071354)	3
GO_Biological_Process_2018	interleukin-6-mediated signaling pathway (GO:0070102)	3
GO_Biological_Process_2018	nucleotide-binding domain, leucine rich repeat containing receptor signaling pathway (GO:0035872)	3
GO_Biological_Process_2018	ERAD pathway (GO:0036503)	3
GO_Biological_Process_2018	negative regulation of cell development (GO:0010721)	3
GO_Biological_Process_2018	sodium ion export from cell (GO:0036376)	3
GO_Biological_Process_2018	sodium ion export (GO:0071436)	3
GO_Biological_Process_2018	mitotic spindle midzone assembly (GO:0051256)	3
GO_Biological_Process_2018	aortic valve development (GO:0003176)	3
GO_Biological_Process_2018	aortic valve morphogenesis (GO:0003180)	3
GO_Biological_Process_2018	regulation of gene silencing by miRNA (GO:0060964)	3
GO_Biological_Process_2018	regulation of nitric oxide biosynthetic process (GO:0045428)	3
GO_Biological_Process_2018	peroxisome proliferator activated receptor signaling pathway (GO:0035357)	3
GO_Biological_Process_2018	regulation of T-helper 2 cell differentiation (GO:0045628)	3
GO_Biological_Process_2018	cargo loading into vesicle (GO:0035459)	3
GO_Biological_Process_2018	ubiquitin-dependent ERAD pathway (GO:0030433)	3
GO_Biological_Process_2018	positive regulation of epithelial cell migration (GO:0010634)	3
GO_Biological_Process_2018	chondroitin sulfate catabolic process (GO:0030207)	3
GO_Biological_Process_2018	regulation of fibroblast growth factor receptor signaling pathway (GO:0040036)	3
GO_Biological_Process_2018	chondroitin sulfate biosynthetic process (GO:0030206)	3
GO_Biological_Process_2018	membrane protein proteolysis (GO:0033619)	3
GO_Biological_Process_2018	intrinsic apoptotic signaling pathway by p53 class mediator (GO:0072332)	3
GO_Biological_Process_2018	phosphatidylinositol 3-kinase signaling (GO:0014065)	3
GO_Biological_Process_2018	hematopoietic stem cell differentiation (GO:0060218)	3
GO_Biological_Process_2018	rRNA metabolic process (GO:0016072)	3
GO_Biological_Process_2018	vesicle-mediated transport between endosomal compartments (GO:0098927)	3
GO_Biological_Process_2018	venous blood vessel development (GO:0060841)	3
GO_Biological_Process_2018	protein localization to kinetochore (GO:0034501)	3
GO_Biological_Process_2018	monoamine transport (GO:0015844)	3
GO_Biological_Process_2018	response to insulin (GO:0032868)	3
GO_Biological_Process_2018	cholesterol transport (GO:0030301)	3
GO_Biological_Process_2018	regulation of vascular endothelial growth factor receptor signaling pathway (GO:0030947)	3
GO_Biological_Process_2018	urogenital system development (GO:0001655)	3
GO_Biological_Process_2018	positive regulation of cellular protein localization (GO:1903829)	3
GO_Biological_Process_2018	in utero embryonic development (GO:0001701)	3
GO_Biological_Process_2018	proteasome assembly (GO:0043248)	3
GO_Biological_Process_2018	positive regulation of protein metabolic process (GO:0051247)	3
GO_Biological_Process_2018	positive regulation of insulin receptor signaling pathway (GO:0046628)	3
GO_Biological_Process_2018	organophosphate biosynthetic process (GO:0090407)	3
GO_Biological_Process_2018	gas transport (GO:0015669)	3
GO_Biological_Process_2018	endocardial cushion development (GO:0003197)	3
GO_Biological_Process_2018	positive regulation of cell adhesion (GO:0045785)	3
GO_Biological_Process_2018	adenylate cyclase-modulating G-protein coupled receptor signaling pathway (GO:0007188)	3
GO_Biological_Process_2018	organic cyclic compound biosynthetic process (GO:1901362)	3
GO_Biological_Process_2018	viral process (GO:0016032)	3
GO_Biological_Process_2018	regulation of multicellular organism growth (GO:0040014)	3
GO_Biological_Process_2018	positive regulation of mesonephros development (GO:0061213)	3
GO_Biological_Process_2018	vascular endothelial growth factor receptor signaling pathway (GO:0048010)	3
GO_Biological_Process_2018	antigen processing and presentation of exogenous peptide antigen via MHC class I, TAP-independent (GO:0002480)	3
GO_Biological_Process_2018	positive regulation of urine volume (GO:0035810)	3
GO_Biological_Process_2018	negative regulation of transcription factor import into nucleus (GO:0042992)	3
GO_Biological_Process_2018	mitochondrial translational termination (GO:0070126)	3
GO_Biological_Process_2018	chaperone-mediated protein complex assembly (GO:0051131)	3
GO_Biological_Process_2018	positive regulation of phagocytosis (GO:0050766)	3
GO_Biological_Process_2018	protein K48-linked ubiquitination (GO:0070936)	3
GO_Biological_Process_2018	serine family amino acid biosynthetic process (GO:0009070)	3
GO_Biological_Process_2018	telomere maintenance via telomere lengthening (GO:0010833)	3
GO_Biological_Process_2018	intrinsic apoptotic signaling pathway (GO:0097193)	3
GO_Biological_Process_2018	telomere maintenance via telomerase (GO:0007004)	3
GO_Biological_Process_2018	signal transduction by p53 class mediator (GO:0072331)	3
GO_Biological_Process_2018	phosphate ion transmembrane transport (GO:0035435)	3
GO_Biological_Process_2018	transcription elongation from RNA polymerase I promoter (GO:0006362)	3
GO_Biological_Process_2018	ATP metabolic process (GO:0046034)	3
GO_Biological_Process_2018	RNA-dependent DNA biosynthetic process (GO:0006278)	3
GO_Biological_Process_2018	negative regulation of multi-organism process (GO:0043901)	3
GO_Biological_Process_2018	regulation of glial cell apoptotic process (GO:0034350)	3
GO_Biological_Process_2018	regulation of RNA export from nucleus (GO:0046831)	3
GO_Biological_Process_2018	establishment of protein localization to peroxisome (GO:0072663)	3
GO_Biological_Process_2018	regulation of adenylate cyclase activity (GO:0045761)	3
GO_Biological_Process_2018	regulation of cell migration (GO:0030334)	3
GO_Biological_Process_2018	intrinsic apoptotic signaling pathway in response to DNA damage by p53 class mediator (GO:0042771)	3
GO_Biological_Process_2018	histone H3-K4 methylation (GO:0051568)	3
GO_Biological_Process_2018	collagen fibril organization (GO:0030199)	3
GO_Biological_Process_2018	regulation of brown fat cell differentiation (GO:0090335)	3
GO_Biological_Process_2018	regulation of response to stress (GO:0080134)	3
GO_Biological_Process_2018	chitin metabolic process (GO:0006030)	3
GO_Biological_Process_2018	chitin catabolic process (GO:0006032)	3
GO_Biological_Process_2018	phosphatidylserine acyl-chain remodeling (GO:0036150)	3
GO_Biological_Process_2018	glucosamine-containing compound catabolic process (GO:1901072)	3
GO_Biological_Process_2018	regulation of protein kinase activity (GO:0045859)	3
GO_Biological_Process_2018	acylglycerol homeostasis (GO:0055090)	3
GO_Biological_Process_2018	positive regulation of killing of cells of other organism (GO:0051712)	3
GO_Biological_Process_2018	pericardium morphogenesis (GO:0003344)	3
GO_Biological_Process_2018	axon regeneration (GO:0031103)	3
GO_Biological_Process_2018	negative regulation of telomere capping (GO:1904354)	3
GO_Biological_Process_2018	regulation of protein complex assembly (GO:0043254)	3
GO_Biological_Process_2018	hormone transport (GO:0009914)	3
GO_Biological_Process_2018	maturation of 5.8S rRNA (GO:0000460)	3
GO_Biological_Process_2018	regulation of interleukin-12 production (GO:0032655)	3
GO_Biological_Process_2018	peptidyl-methionine modification (GO:0018206)	3
GO_Biological_Process_2018	negative regulation of interleukin-2 production (GO:0032703)	3
GO_Biological_Process_2018	Golgi transport vesicle coating (GO:0048200)	3
GO_Biological_Process_2018	COPI-coated vesicle budding (GO:0035964)	3
GO_Biological_Process_2018	COPI coating of Golgi vesicle (GO:0048205)	3
GO_Biological_Process_2018	regulation of RNA polymerase II regulatory region sequence-specific DNA binding (GO:1903025)	3
GO_Biological_Process_2018	cellular amide metabolic process (GO:0043603)	3
GO_Biological_Process_2018	defense response to protozoan (GO:0042832)	3
GO_Biological_Process_2018	extrinsic apoptotic signaling pathway via death domain receptors (GO:0008625)	3
GO_Biological_Process_2018	positive regulation of macrophage derived foam cell differentiation (GO:0010744)	3
GO_Biological_Process_2018	positive regulation of myelination (GO:0031643)	3
GO_Biological_Process_2018	regulation of cellular response to oxidative stress (GO:1900407)	3
GO_Biological_Process_2018	regulation of superoxide metabolic process (GO:0090322)	3
GO_Biological_Process_2018	cellular response to catecholamine stimulus (GO:0071870)	3
GO_Biological_Process_2018	long-term synaptic potentiation (GO:0060291)	3
GO_Biological_Process_2018	lung epithelium development (GO:0060428)	3
GO_Biological_Process_2018	protein destabilization (GO:0031648)	3
GO_Biological_Process_2018	adult heart development (GO:0007512)	3
GO_Biological_Process_2018	positive regulation of striated muscle cell differentiation (GO:0051155)	3
GO_Biological_Process_2018	gluconeogenesis (GO:0006094)	3
GO_Biological_Process_2018	positive regulation of granulocyte differentiation (GO:0030854)	3
GO_Biological_Process_2018	regulation of macroautophagy (GO:0016241)	3
GO_Biological_Process_2018	telomeric loop disassembly (GO:0090657)	3
GO_Biological_Process_2018	regulation of chondrocyte differentiation (GO:0032330)	3
GO_Biological_Process_2018	regulation of receptor internalization (GO:0002090)	3
GO_Biological_Process_2018	mitotic cytokinesis (GO:0000281)	3
GO_Biological_Process_2018	positive regulation of receptor-mediated endocytosis (GO:0048260)	3
GO_Biological_Process_2018	macromolecular complex assembly (GO:0065003)	3
GO_Biological_Process_2018	peptidyl-threonine dephosphorylation (GO:0035970)	3
GO_Biological_Process_2018	regulation of isotype switching (GO:0045191)	3
GO_Biological_Process_2018	tube closure (GO:0060606)	3
GO_Biological_Process_2018	regulation of cellular response to stress (GO:0080135)	3
GO_Biological_Process_2018	mRNA cis splicing, via spliceosome (GO:0045292)	3
GO_Biological_Process_2018	regulation of amyloid precursor protein catabolic process (GO:1902991)	3
GO_Biological_Process_2018	regulation of neurotransmitter transport (GO:0051588)	3
GO_Biological_Process_2018	choline catabolic process (GO:0042426)	3
GO_Biological_Process_2018	nucleosome assembly (GO:0006334)	3
GO_Biological_Process_2018	nucleosome organization (GO:0034728)	3
GO_Biological_Process_2018	peptidyl-arginine modification (GO:0018195)	3
GO_Biological_Process_2018	coenzyme A metabolic process (GO:0015936)	3
GO_Biological_Process_2018	chromosome condensation (GO:0030261)	3
GO_Biological_Process_2018	spliceosomal tri-snRNP complex assembly (GO:0000244)	3
GO_Biological_Process_2018	signal transduction involved in G2 DNA damage checkpoint (GO:0072425)	3
GO_Biological_Process_2018	regulation of mitochondrial depolarization (GO:0051900)	3
GO_Biological_Process_2018	purine ribonucleotide catabolic process (GO:0009154)	3
GO_Biological_Process_2018	ribosome disassembly (GO:0032790)	3
GO_Biological_Process_2018	skeletal system development (GO:0001501)	3
GO_Biological_Process_2018	regulation of T cell activation (GO:0050863)	3
GO_Biological_Process_2018	cellular response to estradiol stimulus (GO:0071392)	3
GO_Biological_Process_2018	regulation of mitochondrion organization (GO:0010821)	3
GO_Biological_Process_2018	JAK-STAT cascade involved in growth hormone signaling pathway (GO:0060397)	3
GO_Biological_Process_2018	cGMP biosynthetic process (GO:0006182)	3
GO_Biological_Process_2018	establishment of protein localization to telomere (GO:0070200)	3
GO_Biological_Process_2018	DNA strand elongation involved in DNA replication (GO:0006271)	3
GO_Biological_Process_2018	alternative mRNA splicing, via spliceosome (GO:0000380)	3
GO_Biological_Process_2018	regulation of protein kinase B signaling (GO:0051896)	3
GO_Biological_Process_2018	lysine metabolic process (GO:0006553)	3
GO_Biological_Process_2018	lysine catabolic process (GO:0006554)	3
GO_Biological_Process_2018	regulation of fatty acid metabolic process (GO:0019217)	3
GO_Biological_Process_2018	negative regulation of platelet-derived growth factor receptor-beta signaling pathway (GO:2000587)	3
GO_Biological_Process_2018	positive regulation of T cell proliferation (GO:0042102)	3
GO_Biological_Process_2018	sterol import (GO:0035376)	3
GO_Biological_Process_2018	cholesterol import (GO:0070508)	3
GO_Biological_Process_2018	lipid particle organization (GO:0034389)	3
GO_Biological_Process_2018	regulation of histone phosphorylation (GO:0033127)	3
GO_Biological_Process_2018	positive regulation of fat cell differentiation (GO:0045600)	3
GO_Biological_Process_2018	negative regulation of cell cycle arrest (GO:0071157)	3
GO_Biological_Process_2018	positive regulation of cell differentiation (GO:0045597)	3
GO_Biological_Process_2018	positive regulation of histone H3-K4 methylation (GO:0051571)	3
GO_Biological_Process_2018	icosanoid secretion (GO:0032309)	3
GO_Biological_Process_2018	organonitrogen compound catabolic process (GO:1901565)	3
GO_Biological_Process_2018	inhibition of cysteine-type endopeptidase activity involved in apoptotic process (GO:1990001)	3
GO_Biological_Process_2018	protein targeting to lysosome (GO:0006622)	3
GO_Biological_Process_2018	atrioventricular valve development (GO:0003171)	3
GO_Biological_Process_2018	protein import (GO:0017038)	3
GO_Biological_Process_2018	steroid biosynthetic process (GO:0006694)	3
GO_Biological_Process_2018	regulation of apoptotic process (GO:0042981)	3
GO_Biological_Process_2018	regulation of keratinocyte proliferation (GO:0010837)	3
GO_Biological_Process_2018	epithelial cell morphogenesis (GO:0003382)	3
GO_Biological_Process_2018	cartilage development (GO:0051216)	3
GO_Biological_Process_2018	positive regulation of filopodium assembly (GO:0051491)	3
GO_Biological_Process_2018	glutathione metabolic process (GO:0006749)	3
GO_Biological_Process_2018	digestive tract development (GO:0048565)	3
GO_Biological_Process_2018	cellular response to forskolin (GO:1904322)	3
GO_Biological_Process_2018	response to forskolin (GO:1904321)	3
GO_Biological_Process_2018	steroid hormone mediated signaling pathway (GO:0043401)	3
GO_Biological_Process_2018	negative regulation of T cell activation (GO:0050868)	3
GO_Biological_Process_2018	negative regulation of Ras protein signal transduction (GO:0046580)	3
GO_Biological_Process_2018	regulation of cell growth (GO:0001558)	3
GO_Biological_Process_2018	positive regulation of chemokine secretion (GO:0090197)	3
GO_Biological_Process_2018	phospholipase C-activating dopamine receptor signaling pathway (GO:0060158)	3
GO_Biological_Process_2018	digestive system development (GO:0055123)	3
GO_Biological_Process_2018	bicellular tight junction assembly (GO:0070830)	3
GO_Biological_Process_2018	response to increased oxygen levels (GO:0036296)	3
GO_Biological_Process_2018	phagosome maturation (GO:0090382)	3
GO_Biological_Process_2018	tooth mineralization (GO:0034505)	3
GO_Biological_Process_2018	complement receptor mediated signaling pathway (GO:0002430)	2
GO_Biological_Process_2018	regulation of phosphoprotein phosphatase activity (GO:0043666)	2
GO_Biological_Process_2018	immune response-activating cell surface receptor signaling pathway (GO:0002429)	2
GO_Biological_Process_2018	positive regulation of G-protein coupled receptor protein signaling pathway (GO:0045745)	2
GO_Biological_Process_2018	positive regulation of cytosolic calcium ion concentration (GO:0007204)	2
GO_Biological_Process_2018	regulation of cytosolic calcium ion concentration (GO:0051480)	2
GO_Biological_Process_2018	regulation of mRNA polyadenylation (GO:1900363)	2
GO_Biological_Process_2018	negative regulation of tumor necrosis factor production (GO:0032720)	2
GO_Biological_Process_2018	regulation of Rho protein signal transduction (GO:0035023)	2
GO_Biological_Process_2018	positive regulation of vascular endothelial growth factor receptor signaling pathway (GO:0030949)	2
GO_Biological_Process_2018	regulation of cyclic-nucleotide phosphodiesterase activity (GO:0051342)	2
GO_Biological_Process_2018	pharyngeal arch artery morphogenesis (GO:0061626)	2
GO_Biological_Process_2018	regulation of endothelial cell chemotaxis (GO:2001026)	2
GO_Biological_Process_2018	neuron differentiation (GO:0030182)	2
GO_Biological_Process_2018	negative regulation of mRNA polyadenylation (GO:1900364)	2
GO_Biological_Process_2018	negative regulation of interleukin-1 production (GO:0032692)	2
GO_Biological_Process_2018	regulation of lipid metabolic process (GO:0019216)	2
GO_Biological_Process_2018	positive regulation of cAMP metabolic process (GO:0030816)	2
GO_Biological_Process_2018	positive regulation of cysteine-type endopeptidase activity involved in apoptotic process (GO:0043280)	2
GO_Biological_Process_2018	positive regulation of cAMP biosynthetic process (GO:0030819)	2
GO_Biological_Process_2018	negative regulation of receptor-mediated endocytosis (GO:0048261)	2
GO_Biological_Process_2018	modified amino acid transport (GO:0072337)	2
GO_Biological_Process_2018	xenobiotic glucuronidation (GO:0052697)	2
GO_Biological_Process_2018	positive regulation of cell cycle G2/M phase transition (GO:1902751)	2
GO_Biological_Process_2018	regulation of ion homeostasis (GO:2000021)	2
GO_Biological_Process_2018	morphogenesis of an epithelium (GO:0002009)	2
GO_Biological_Process_2018	striated muscle hypertrophy (GO:0014897)	2
GO_Biological_Process_2018	response to alcohol (GO:0097305)	2
GO_Biological_Process_2018	microtubule depolymerization (GO:0007019)	2
GO_Biological_Process_2018	calcium ion transmembrane import into cytosol (GO:0097553)	2
GO_Biological_Process_2018	protein-DNA complex disassembly (GO:0032986)	2
GO_Biological_Process_2018	toll-like receptor 9 signaling pathway (GO:0034162)	2
GO_Biological_Process_2018	detection of mechanical stimulus involved in sensory perception (GO:0050974)	2
GO_Biological_Process_2018	pattern recognition receptor signaling pathway (GO:0002221)	2
GO_Biological_Process_2018	embryonic forelimb morphogenesis (GO:0035115)	2
GO_Biological_Process_2018	toll-like receptor 3 signaling pathway (GO:0034138)	2
GO_Biological_Process_2018	cardiolipin metabolic process (GO:0032048)	2
GO_Biological_Process_2018	secretion (GO:0046903)	2
GO_Biological_Process_2018	forelimb morphogenesis (GO:0035136)	2
GO_Biological_Process_2018	phosphatidylglycerol biosynthetic process (GO:0006655)	2
GO_Biological_Process_2018	ATP hydrolysis coupled proton transport (GO:0015991)	2
GO_Biological_Process_2018	positive regulation of transmembrane transport (GO:0034764)	2
GO_Biological_Process_2018	pri-miRNA transcription from RNA polymerase II promoter (GO:0061614)	2
GO_Biological_Process_2018	ATP hydrolysis coupled cation transmembrane transport (GO:0099132)	2
GO_Biological_Process_2018	negative regulation of stress fiber assembly (GO:0051497)	2
GO_Biological_Process_2018	purine-containing compound metabolic process (GO:0072521)	2
GO_Biological_Process_2018	hepaticobiliary system development (GO:0061008)	2
GO_Biological_Process_2018	piRNA metabolic process (GO:0034587)	2
GO_Biological_Process_2018	early endosome to late endosome transport (GO:0045022)	2
GO_Biological_Process_2018	positive regulation of chemokine production (GO:0032722)	2
GO_Biological_Process_2018	cation transmembrane transport (GO:0098655)	2
GO_Biological_Process_2018	peptidyl-cysteine modification (GO:0018198)	2
GO_Biological_Process_2018	positive regulation of monocyte differentiation (GO:0045657)	2
GO_Biological_Process_2018	negative regulation of vascular permeability (GO:0043116)	2
GO_Biological_Process_2018	glomerular visceral epithelial cell development (GO:0072015)	2
GO_Biological_Process_2018	regulation of histone H4 acetylation (GO:0090239)	2
GO_Biological_Process_2018	positive regulation of viral release from host cell (GO:1902188)	2
GO_Biological_Process_2018	positive regulation of potassium ion transport (GO:0043268)	2
GO_Biological_Process_2018	synaptic vesicle endocytosis (GO:0048488)	2
GO_Biological_Process_2018	clathrin-dependent endocytosis (GO:0072583)	2
GO_Biological_Process_2018	protein localization to endoplasmic reticulum exit site (GO:0070973)	2
GO_Biological_Process_2018	protein modification by small protein conjugation or removal (GO:0070647)	2
GO_Biological_Process_2018	B cell activation involved in immune response (GO:0002312)	2
GO_Biological_Process_2018	negative regulation of G1/S transition of mitotic cell cycle (GO:2000134)	2
GO_Biological_Process_2018	cellular defense response (GO:0006968)	2
GO_Biological_Process_2018	regulation of cardiac muscle cell membrane repolarization (GO:0099623)	2
GO_Biological_Process_2018	regulation of hemopoiesis (GO:1903706)	2
GO_Biological_Process_2018	regulation of receptor biosynthetic process (GO:0010869)	2
GO_Biological_Process_2018	protein carboxylation (GO:0018214)	2
GO_Biological_Process_2018	peptidyl-glutamic acid carboxylation (GO:0017187)	2
GO_Biological_Process_2018	sodium ion homeostasis (GO:0055078)	2
GO_Biological_Process_2018	positive regulation of cell development (GO:0010720)	2
GO_Biological_Process_2018	pyrimidine nucleobase metabolic process (GO:0006206)	2
GO_Biological_Process_2018	regulation of G0 to G1 transition (GO:0070316)	2
GO_Biological_Process_2018	negative regulation of interleukin-8 production (GO:0032717)	2
GO_Biological_Process_2018	regulation of intrinsic apoptotic signaling pathway (GO:2001242)	2
GO_Biological_Process_2018	acetylcholine receptor signaling pathway (GO:0095500)	2
GO_Biological_Process_2018	establishment of epithelial cell apical/basal polarity (GO:0045198)	2
GO_Biological_Process_2018	regulation of protein metabolic process (GO:0051246)	2
GO_Biological_Process_2018	establishment of apical/basal cell polarity (GO:0035089)	2
GO_Biological_Process_2018	interleukin-1-mediated signaling pathway (GO:0070498)	2
GO_Biological_Process_2018	response to ketone (GO:1901654)	2
GO_Biological_Process_2018	negative regulation of hemopoiesis (GO:1903707)	2
GO_Biological_Process_2018	ventricular cardiac muscle tissue development (GO:0003229)	2
GO_Biological_Process_2018	transmembrane transport (GO:0055085)	2
GO_Biological_Process_2018	negative regulation of osteoblast differentiation (GO:0045668)	2
GO_Biological_Process_2018	stress-activated MAPK cascade (GO:0051403)	2
GO_Biological_Process_2018	G1 DNA damage checkpoint (GO:0044783)	2
GO_Biological_Process_2018	positive regulation of mRNA splicing, via spliceosome (GO:0048026)	2
GO_Biological_Process_2018	positive regulation of transcription initiation from RNA polymerase II promoter (GO:0060261)	2
GO_Biological_Process_2018	cytoplasmic translational initiation (GO:0002183)	2
GO_Biological_Process_2018	regulation of sister chromatid cohesion (GO:0007063)	2
GO_Biological_Process_2018	positive regulation of transcription from RNA polymerase I promoter (GO:0045943)	2
GO_Biological_Process_2018	negative regulation of catabolic process (GO:0009895)	2
GO_Biological_Process_2018	microtubule polymerization or depolymerization (GO:0031109)	2
GO_Biological_Process_2018	copper ion transport (GO:0006825)	2
GO_Biological_Process_2018	positive regulation of ion transmembrane transport (GO:0034767)	2
GO_Biological_Process_2018	purine ribonucleoside monophosphate metabolic process (GO:0009167)	2
GO_Biological_Process_2018	regulation of cytokine production (GO:0001817)	2
GO_Biological_Process_2018	transcription from RNA polymerase III promoter (GO:0006383)	2
GO_Biological_Process_2018	protein alpha-1,2-demannosylation (GO:0036508)	2
GO_Biological_Process_2018	lipoxin biosynthetic process (GO:2001301)	2
GO_Biological_Process_2018	lymphoid progenitor cell differentiation (GO:0002320)	2
GO_Biological_Process_2018	organelle disassembly (GO:1903008)	2
GO_Biological_Process_2018	cellular sodium ion homeostasis (GO:0006883)	2
GO_Biological_Process_2018	nucleobase-containing compound catabolic process (GO:0034655)	2
GO_Biological_Process_2018	mitochondrial respiratory chain complex IV biogenesis (GO:0097034)	2
GO_Biological_Process_2018	regulation of cell-substrate adhesion (GO:0010810)	2
GO_Biological_Process_2018	regulation of coenzyme metabolic process (GO:0051196)	2
GO_Biological_Process_2018	regulation of toll-like receptor 9 signaling pathway (GO:0034163)	2
GO_Biological_Process_2018	regulation of viral transcription (GO:0046782)	2
GO_Biological_Process_2018	negative regulation of vascular smooth muscle cell proliferation (GO:1904706)	2
GO_Biological_Process_2018	regulation of vascular endothelial cell proliferation (GO:1905562)	2
GO_Biological_Process_2018	protein exit from endoplasmic reticulum (GO:0032527)	2
GO_Biological_Process_2018	response to catecholamine (GO:0071869)	2
GO_Biological_Process_2018	cellular response to monoamine stimulus (GO:0071868)	2
GO_Biological_Process_2018	regulation of establishment of protein localization (GO:0070201)	2
GO_Biological_Process_2018	positive regulation of RNA polymerase II transcriptional preinitiation complex assembly (GO:0045899)	2
GO_Biological_Process_2018	intrinsic apoptotic signaling pathway in response to DNA damage (GO:0008630)	2
GO_Biological_Process_2018	thymus development (GO:0048538)	2
GO_Biological_Process_2018	cellular response to decreased oxygen levels (GO:0036294)	2
GO_Biological_Process_2018	regulation of mitotic spindle organization (GO:0060236)	2
GO_Biological_Process_2018	positive regulation of Wnt signaling pathway (GO:0030177)	2
GO_Biological_Process_2018	negative regulation of lymphocyte apoptotic process (GO:0070229)	2
GO_Biological_Process_2018	negative regulation of DNA-templated transcription, elongation (GO:0032785)	2
GO_Biological_Process_2018	nuclear pore organization (GO:0006999)	2
GO_Biological_Process_2018	tricarboxylic acid metabolic process (GO:0072350)	2
GO_Biological_Process_2018	proteolysis involved in cellular protein catabolic process (GO:0051603)	2
GO_Biological_Process_2018	mesoderm formation (GO:0001707)	2
GO_Biological_Process_2018	regulation of viral process (GO:0050792)	2
GO_Biological_Process_2018	postreplication repair (GO:0006301)	2
GO_Biological_Process_2018	DNA modification (GO:0006304)	2
GO_Biological_Process_2018	positive regulation of vasculature development (GO:1904018)	2
GO_Biological_Process_2018	skeletal muscle thin filament assembly (GO:0030240)	2
GO_Biological_Process_2018	positive regulation of signal transduction by p53 class mediator (GO:1901798)	2
GO_Biological_Process_2018	2-oxoglutarate metabolic process (GO:0006103)	2
GO_Biological_Process_2018	sphingolipid biosynthetic process (GO:0030148)	2
GO_Biological_Process_2018	negative regulation of vascular endothelial growth factor receptor signaling pathway (GO:0030948)	2
GO_Biological_Process_2018	outer dynein arm assembly (GO:0036158)	2
GO_Biological_Process_2018	endoderm formation (GO:0001706)	2
GO_Biological_Process_2018	regulation of mitotic nuclear division (GO:0007088)	2
GO_Biological_Process_2018	regulation of angiogenesis (GO:0045765)	2
GO_Biological_Process_2018	microtubule cytoskeleton organization involved in mitosis (GO:1902850)	2
GO_Biological_Process_2018	regulation of BMP signaling pathway (GO:0030510)	2
GO_Biological_Process_2018	renal water homeostasis (GO:0003091)	2
GO_Biological_Process_2018	amine metabolic process (GO:0009308)	2
GO_Biological_Process_2018	sphingosine-1-phosphate signaling pathway (GO:0003376)	2
GO_Biological_Process_2018	sulfation (GO:0051923)	2
GO_Biological_Process_2018	peptidyl-threonine phosphorylation (GO:0018107)	2
GO_Biological_Process_2018	ammonium transport (GO:0015696)	2
GO_Biological_Process_2018	regulation of pathway-restricted SMAD protein phosphorylation (GO:0060393)	2
GO_Biological_Process_2018	mesenchyme morphogenesis (GO:0072132)	2
GO_Biological_Process_2018	antigen processing and presentation of peptide antigen via MHC class I (GO:0002474)	2
GO_Biological_Process_2018	interferon-gamma-mediated signaling pathway (GO:0060333)	2
GO_Biological_Process_2018	ER overload response (GO:0006983)	2
GO_Biological_Process_2018	cellular response to unfolded protein (GO:0034620)	2
GO_Biological_Process_2018	negative regulation of response to biotic stimulus (GO:0002832)	2
GO_Biological_Process_2018	regulation of urine volume (GO:0035809)	2
GO_Biological_Process_2018	cellular response to topologically incorrect protein (GO:0035967)	2
GO_Biological_Process_2018	transcription, DNA-templated (GO:0006351)	2
GO_Biological_Process_2018	inner mitochondrial membrane organization (GO:0007007)	2
GO_Biological_Process_2018	hindlimb morphogenesis (GO:0035137)	2
GO_Biological_Process_2018	positive regulation of transcription from RNA polymerase II promoter in response to stress (GO:0036003)	2
GO_Biological_Process_2018	regulation of membrane repolarization (GO:0060306)	2
GO_Biological_Process_2018	translational termination (GO:0006415)	2
GO_Biological_Process_2018	regulation of execution phase of apoptosis (GO:1900117)	2
GO_Biological_Process_2018	RNA transport (GO:0050658)	2
GO_Biological_Process_2018	muscle cell migration (GO:0014812)	2
GO_Biological_Process_2018	positive regulation of mitotic sister chromatid separation (GO:1901970)	2
GO_Biological_Process_2018	positive regulation of neuroblast proliferation (GO:0002052)	2
GO_Biological_Process_2018	positive regulation of metaphase/anaphase transition of cell cycle (GO:1902101)	2
GO_Biological_Process_2018	regulation of ventricular cardiac muscle cell membrane repolarization (GO:0060307)	2
GO_Biological_Process_2018	regulation of phosphate metabolic process (GO:0019220)	2
GO_Biological_Process_2018	positive regulation of heterotypic cell-cell adhesion (GO:0034116)	2
GO_Biological_Process_2018	regulation of plasma membrane bounded cell projection organization (GO:0120035)	2
GO_Biological_Process_2018	apical junction assembly (GO:0043297)	2
GO_Biological_Process_2018	protein localization to microtubule organizing center (GO:1905508)	2
GO_Biological_Process_2018	response to cholesterol (GO:0070723)	2
GO_Biological_Process_2018	regulation of insulin receptor signaling pathway (GO:0046626)	2
GO_Biological_Process_2018	endocytic recycling (GO:0032456)	2
GO_Biological_Process_2018	connective tissue development (GO:0061448)	2
GO_Biological_Process_2018	positive regulation of protein insertion into mitochondrial membrane involved in apoptotic signaling pathway (GO:1900740)	2
GO_Biological_Process_2018	regulation of protein insertion into mitochondrial membrane involved in apoptotic signaling pathway (GO:1900739)	2
GO_Biological_Process_2018	regulation of transcription from RNA polymerase II promoter involved in heart development (GO:1901213)	2
GO_Biological_Process_2018	regulation of proteolysis involved in cellular protein catabolic process (GO:1903050)	2
GO_Biological_Process_2018	neurotransmitter receptor internalization (GO:0099590)	2
GO_Biological_Process_2018	negative regulation of fibrinolysis (GO:0051918)	2
GO_Biological_Process_2018	gap junction assembly (GO:0016264)	2
GO_Biological_Process_2018	ventricular cardiac muscle tissue morphogenesis (GO:0055010)	2
GO_Biological_Process_2018	regulation of Rac protein signal transduction (GO:0035020)	2
GO_Biological_Process_2018	neuron projection extension (GO:1990138)	2
GO_Biological_Process_2018	negative regulation of cell cycle process (GO:0010948)	2
GO_Biological_Process_2018	chromatin silencing at telomere (GO:0006348)	2
GO_Biological_Process_2018	regulation of NAD(P)H oxidase activity (GO:0033860)	2
GO_Biological_Process_2018	regulation of sequestering of triglyceride (GO:0010889)	2
GO_Biological_Process_2018	lipid homeostasis (GO:0055088)	2
GO_Biological_Process_2018	response to interferon-beta (GO:0035456)	2
GO_Biological_Process_2018	phosphatidylserine metabolic process (GO:0006658)	2
GO_Biological_Process_2018	negative regulation of lipase activity (GO:0060192)	2
GO_Biological_Process_2018	regulation of mRNA catabolic process (GO:0061013)	2
GO_Biological_Process_2018	histone deacetylation (GO:0016575)	2
GO_Biological_Process_2018	negative regulation of lipid catabolic process (GO:0050995)	2
GO_Biological_Process_2018	positive regulation of cellular response to insulin stimulus (GO:1900078)	2
GO_Biological_Process_2018	positive regulation of voltage-gated potassium channel activity (GO:1903818)	2
GO_Biological_Process_2018	membrane protein intracellular domain proteolysis (GO:0031293)	2
GO_Biological_Process_2018	regulation of fatty acid beta-oxidation (GO:0031998)	2
GO_Biological_Process_2018	positive regulation of signal transduction (GO:0009967)	2
GO_Biological_Process_2018	sensory perception of taste (GO:0050909)	2
GO_Biological_Process_2018	positive regulation of small GTPase mediated signal transduction (GO:0051057)	2
GO_Biological_Process_2018	negative regulation of axon extension involved in axon guidance (GO:0048843)	2
GO_Biological_Process_2018	cellular response to leptin stimulus (GO:0044320)	2
GO_Biological_Process_2018	astrocyte differentiation (GO:0048708)	2
GO_Biological_Process_2018	axon extension (GO:0048675)	2
GO_Biological_Process_2018	response to leptin (GO:0044321)	2
GO_Biological_Process_2018	pulmonary valve morphogenesis (GO:0003184)	2
GO_Biological_Process_2018	negative regulation of myoblast differentiation (GO:0045662)	2
GO_Biological_Process_2018	smoothened signaling pathway (GO:0007224)	2
GO_Biological_Process_2018	positive regulation of carbohydrate metabolic process (GO:0045913)	2
GO_Biological_Process_2018	C-terminal protein lipidation (GO:0006501)	2
GO_Biological_Process_2018	regulation of NFAT protein import into nucleus (GO:0051532)	2
GO_Biological_Process_2018	positive regulation of I-kappaB kinase/NF-kappaB signaling (GO:0043123)	2
GO_Biological_Process_2018	very-low-density lipoprotein particle remodeling (GO:0034372)	2
GO_Biological_Process_2018	hyperosmotic response (GO:0006972)	2
GO_Biological_Process_2018	regulation of double-strand break repair via nonhomologous end joining (GO:2001032)	2
GO_Biological_Process_2018	mitochondrial ATP synthesis coupled electron transport (GO:0042775)	2
GO_Biological_Process_2018	regulation of TORC1 signaling (GO:1903432)	2
GO_Biological_Process_2018	negative regulation of cholesterol transport (GO:0032375)	2
GO_Biological_Process_2018	melanosome organization (GO:0032438)	2
GO_Biological_Process_2018	ectoderm development (GO:0007398)	2
GO_Biological_Process_2018	negative regulation of chromosome organization (GO:2001251)	2
GO_Biological_Process_2018	ATF6-mediated unfolded protein response (GO:0036500)	2
GO_Biological_Process_2018	peptidyl-amino acid modification (GO:0018193)	2
GO_Biological_Process_2018	positive regulation of ribosome biogenesis (GO:0090070)	2
GO_Biological_Process_2018	positive regulation of rRNA processing (GO:2000234)	2
GO_Biological_Process_2018	muscle cell fate commitment (GO:0042693)	2
GO_Biological_Process_2018	regulation of cellular senescence (GO:2000772)	2
GO_Biological_Process_2018	regulation of histone methylation (GO:0031060)	2
GO_Biological_Process_2018	regulation of mitotic sister chromatid separation (GO:0010965)	2
GO_Biological_Process_2018	positive regulation of DNA repair (GO:0045739)	2
GO_Biological_Process_2018	positive regulation of RNA export from nucleus (GO:0046833)	2
GO_Biological_Process_2018	positive regulation of nucleobase-containing compound transport (GO:0032241)	2
GO_Biological_Process_2018	positive regulation of cellular protein catabolic process (GO:1903364)	2
GO_Biological_Process_2018	amino sugar biosynthetic process (GO:0046349)	2
GO_Biological_Process_2018	response to glucocorticoid (GO:0051384)	2
GO_Biological_Process_2018	base-excision repair, AP site formation (GO:0006285)	2
GO_Biological_Process_2018	regulation of telomere maintenance (GO:0032204)	2
GO_Biological_Process_2018	atrial septum morphogenesis (GO:0060413)	2
GO_Biological_Process_2018	regulation of nitrogen compound metabolic process (GO:0051171)	2
GO_Biological_Process_2018	viral RNA genome replication (GO:0039694)	2
GO_Biological_Process_2018	response to interleukin-6 (GO:0070741)	2
GO_Biological_Process_2018	DNA damage response, signal transduction by p53 class mediator resulting in transcription of p21 class mediator (GO:0006978)	2
GO_Biological_Process_2018	positive regulation of JNK cascade (GO:0046330)	2
GO_Biological_Process_2018	DNA damage response, signal transduction resulting in transcription (GO:0042772)	2
GO_Biological_Process_2018	purine ribonucleoside bisphosphate metabolic process (GO:0034035)	2
GO_Biological_Process_2018	gene silencing by miRNA (GO:0035195)	2
GO_Biological_Process_2018	phospholipid biosynthetic process (GO:0008654)	2
GO_Biological_Process_2018	negative regulation of viral process (GO:0048525)	2
GO_Biological_Process_2018	positive regulation of apoptotic signaling pathway (GO:2001235)	2
GO_Biological_Process_2018	telomere maintenance (GO:0000723)	2
GO_Biological_Process_2018	glucose metabolic process (GO:0006006)	2
GO_Biological_Process_2018	regulation of bone remodeling (GO:0046850)	2
GO_Biological_Process_2018	negative regulation of translational initiation (GO:0045947)	2
GO_Biological_Process_2018	regulation of protein import into nucleus, translocation (GO:0033158)	2
GO_Biological_Process_2018	response to gamma radiation (GO:0010332)	2
GO_Biological_Process_2018	cellular response to lipopolysaccharide (GO:0071222)	2
GO_Biological_Process_2018	N-glycan processing (GO:0006491)	2
GO_Biological_Process_2018	positive regulation of intracellular steroid hormone receptor signaling pathway (GO:0033145)	2
GO_Biological_Process_2018	transmembrane receptor protein tyrosine kinase signaling pathway (GO:0007169)	2
GO_Biological_Process_2018	protein glycosylation (GO:0006486)	2
GO_Biological_Process_2018	skeletal muscle cell differentiation (GO:0035914)	2
GO_Biological_Process_2018	canonical glycolysis (GO:0061621)	2
GO_Biological_Process_2018	glycolytic process through glucose-6-phosphate (GO:0061620)	2
GO_Biological_Process_2018	glucose catabolic process to pyruvate (GO:0061718)	2
GO_Biological_Process_2018	epithelium development (GO:0060429)	2
GO_Biological_Process_2018	photoreceptor cell development (GO:0042461)	2
GO_Biological_Process_2018	GTP metabolic process (GO:0046039)	2
GO_Biological_Process_2018	positive regulation of protein kinase C signaling (GO:0090037)	2
GO_Biological_Process_2018	regulation of microtubule binding (GO:1904526)	2
GO_Biological_Process_2018	regulation of DNA replication (GO:0006275)	2
GO_Biological_Process_2018	regulation of calcineurin-NFAT signaling cascade (GO:0070884)	2
GO_Biological_Process_2018	neuromuscular synaptic transmission (GO:0007274)	2
GO_Biological_Process_2018	positive regulation of cell death (GO:0010942)	2
GO_Biological_Process_2018	cellular response to cAMP (GO:0071320)	2
GO_Biological_Process_2018	mitotic DNA damage checkpoint (GO:0044773)	2
GO_Biological_Process_2018	regulation of toll-like receptor 2 signaling pathway (GO:0034135)	2
GO_Biological_Process_2018	NAD biosynthetic process (GO:0009435)	2
GO_Biological_Process_2018	regulation of actin polymerization or depolymerization (GO:0008064)	2
GO_Biological_Process_2018	cellular response to bacterial lipopeptide (GO:0071221)	2
GO_Biological_Process_2018	protein heterotetramerization (GO:0051290)	2
GO_Biological_Process_2018	protein heterooligomerization (GO:0051291)	2
GO_Biological_Process_2018	protein-DNA complex assembly (GO:0065004)	2
GO_Biological_Process_2018	mitotic G1/S transition checkpoint (GO:0044819)	2
GO_Biological_Process_2018	ketone body metabolic process (GO:1902224)	2
GO_Biological_Process_2018	production of small RNA involved in gene silencing by RNA (GO:0070918)	2
GO_Biological_Process_2018	RNA splicing, via transesterification reactions (GO:0000375)	2
GO_Biological_Process_2018	posttranscriptional gene silencing by RNA (GO:0035194)	2
GO_Biological_Process_2018	protein tetramerization (GO:0051262)	2
GO_Biological_Process_2018	miRNA loading onto RISC involved in gene silencing by miRNA (GO:0035280)	2
GO_Biological_Process_2018	negative regulation of macrophage activation (GO:0043031)	2
GO_Biological_Process_2018	regulation of protein targeting to mitochondrion (GO:1903214)	2
GO_Biological_Process_2018	positive regulation of protein targeting to mitochondrion (GO:1903955)	2
GO_Biological_Process_2018	positive regulation of peptidase activity (GO:0010952)	2
GO_Biological_Process_2018	positive regulation of release of cytochrome c from mitochondria (GO:0090200)	2
GO_Biological_Process_2018	regulation of monocyte differentiation (GO:0045655)	2
GO_Biological_Process_2018	regulation of cytokine secretion (GO:0050707)	2
GO_Biological_Process_2018	microtubule anchoring at microtubule organizing center (GO:0072393)	2
GO_Biological_Process_2018	positive regulation of natural killer cell activation (GO:0032816)	2
GO_Biological_Process_2018	negative regulation of intrinsic apoptotic signaling pathway in response to DNA damage (GO:1902230)	2
GO_Biological_Process_2018	protein N-linked glycosylation (GO:0006487)	2
GO_Biological_Process_2018	positive regulation of myeloid leukocyte differentiation (GO:0002763)	2
GO_Biological_Process_2018	intraciliary transport (GO:0042073)	2
GO_Biological_Process_2018	regulation of DNA biosynthetic process (GO:2000278)	2
GO_Biological_Process_2018	positive regulation of fatty acid oxidation (GO:0046321)	2
GO_Biological_Process_2018	cellular response to amino acid starvation (GO:0034198)	2
GO_Biological_Process_2018	regulation of protein serine/threonine kinase activity (GO:0071900)	2
GO_Biological_Process_2018	positive regulation of mitochondrion organization (GO:0010822)	2
GO_Biological_Process_2018	regulation of endocytosis (GO:0030100)	2
GO_Biological_Process_2018	protein sulfation (GO:0006477)	2
GO_Biological_Process_2018	positive regulation of actin filament depolymerization (GO:0030836)	2
GO_Biological_Process_2018	response to lead ion (GO:0010288)	2
GO_Biological_Process_2018	positive regulation of microtubule polymerization or depolymerization (GO:0031112)	2
GO_Biological_Process_2018	pore complex assembly (GO:0046931)	2
GO_Biological_Process_2018	phosphatidylethanolamine biosynthetic process (GO:0006646)	2
GO_Biological_Process_2018	JAK-STAT cascade (GO:0007259)	2
GO_Biological_Process_2018	mitotic metaphase plate congression (GO:0007080)	2
GO_Biological_Process_2018	water-soluble vitamin metabolic process (GO:0006767)	2
GO_Biological_Process_2018	regulation of MAP kinase activity (GO:0043405)	2
GO_Biological_Process_2018	ATP synthesis coupled proton transport (GO:0015986)	2
GO_Biological_Process_2018	nucleotide-excision repair, DNA gap filling (GO:0006297)	2
GO_Biological_Process_2018	cellular response to heat (GO:0034605)	2
GO_Biological_Process_2018	positive regulation of interleukin-17 production (GO:0032740)	2
GO_Biological_Process_2018	regulation of centriole replication (GO:0046599)	2
GO_Biological_Process_2018	positive regulation of activation of Janus kinase activity (GO:0010536)	2
GO_Biological_Process_2018	positive regulation of amyloid-beta clearance (GO:1900223)	2
GO_Biological_Process_2018	DNA ligation (GO:0006266)	2
GO_Biological_Process_2018	positive regulation of tissue remodeling (GO:0034105)	2
GO_Biological_Process_2018	regulation of cytoplasmic mRNA processing body assembly (GO:0010603)	2
GO_Biological_Process_2018	negative regulation of centrosome duplication (GO:0010826)	2
GO_Biological_Process_2018	purine ribonucleotide biosynthetic process (GO:0009152)	2
GO_Biological_Process_2018	modulation by host of viral transcription (GO:0043921)	2
GO_Biological_Process_2018	transcription-coupled nucleotide-excision repair (GO:0006283)	2
GO_Biological_Process_2018	stimulatory C-type lectin receptor signaling pathway (GO:0002223)	2
GO_Biological_Process_2018	innate immune response activating cell surface receptor signaling pathway (GO:0002220)	2
GO_Biological_Process_2018	arachidonate transport (GO:1903963)	2
GO_Biological_Process_2018	osteoblast development (GO:0002076)	2
GO_Biological_Process_2018	arachidonic acid secretion (GO:0050482)	2
GO_Biological_Process_2018	regulation of actin filament polymerization (GO:0030833)	2
GO_Biological_Process_2018	positive regulation of viral transcription (GO:0050434)	2
GO_Biological_Process_2018	regulation of chemokine biosynthetic process (GO:0045073)	2
GO_Biological_Process_2018	heme catabolic process (GO:0042167)	2
GO_Biological_Process_2018	porphyrin-containing compound catabolic process (GO:0006787)	2
GO_Biological_Process_2018	regulation of cell proliferation (GO:0042127)	2
GO_Biological_Process_2018	regulation of myoblast differentiation (GO:0045661)	2
GO_Biological_Process_2018	aromatic compound catabolic process (GO:0019439)	2
GO_Biological_Process_2018	transition metal ion homeostasis (GO:0055076)	2
GO_Biological_Process_2018	methionine metabolic process (GO:0006555)	2
GO_Biological_Process_2018	regulation of release of sequestered calcium ion into cytosol (GO:0051279)	2
GO_Biological_Process_2018	L-fucose metabolic process (GO:0042354)	2
GO_Biological_Process_2018	fucose catabolic process (GO:0019317)	2
GO_Biological_Process_2018	L-fucose catabolic process (GO:0042355)	2
GO_Biological_Process_2018	fatty acid transmembrane transport (GO:1902001)	2
GO_Biological_Process_2018	carnitine shuttle (GO:0006853)	2
GO_Biological_Process_2018	cellular response to interleukin-15 (GO:0071350)	2
GO_Biological_Process_2018	interleukin-15-mediated signaling pathway (GO:0035723)	2
GO_Biological_Process_2018	regulation of heart rate by cardiac conduction (GO:0086091)	2
GO_Biological_Process_2018	negative regulation of interferon-gamma production (GO:0032689)	2
GO_Biological_Process_2018	angiogenesis involved in wound healing (GO:0060055)	2
GO_Biological_Process_2018	negative regulation of blood coagulation (GO:0030195)	2
GO_Biological_Process_2018	negative regulation of gluconeogenesis (GO:0045721)	2
GO_Biological_Process_2018	negative regulation of cellular carbohydrate metabolic process (GO:0010677)	2
GO_Biological_Process_2018	positive regulation of type I interferon-mediated signaling pathway (GO:0060340)	2
GO_Biological_Process_2018	response to glucagon (GO:0033762)	2
GO_Biological_Process_2018	tRNA pseudouridine synthesis (GO:0031119)	2
GO_Biological_Process_2018	mitochondrial respiratory chain complex assembly (GO:0033108)	2
GO_Biological_Process_2018	spinal cord motor neuron differentiation (GO:0021522)	2
GO_Biological_Process_2018	NADH dehydrogenase complex assembly (GO:0010257)	2
GO_Biological_Process_2018	mitochondrial respiratory chain complex I biogenesis (GO:0097031)	2
GO_Biological_Process_2018	mitochondrial respiratory chain complex I assembly (GO:0032981)	2
GO_Biological_Process_2018	ATP biosynthetic process (GO:0006754)	2
GO_Biological_Process_2018	myeloid cell differentiation (GO:0030099)	2
GO_Biological_Process_2018	positive regulation of alcohol biosynthetic process (GO:1902932)	2
GO_Biological_Process_2018	cellular response to type I interferon (GO:0071357)	2
GO_Biological_Process_2018	type I interferon signaling pathway (GO:0060337)	2
GO_Biological_Process_2018	kidney development (GO:0001822)	2
GO_Biological_Process_2018	positive regulation of macromolecule metabolic process (GO:0010604)	2
GO_Biological_Process_2018	regulation of gene expression, epigenetic (GO:0040029)	2
[truncated: 997 more rows]
